# Supplementary material for: Genome-Wide Expression and Physiological Profiling of Pearl Millet Genotype Reveal the Biological Pathways and Various Gene Clusters Underlying Salt Resistance
Source: Front Plant Sci. 2022 Mar 28;13:849618. doi: 10.3389/fpls.2022.849618 (PMC8996197; doi:10.3389/fpls.2022.849618)
Supplement: Supplementary file 8 [file Table_8.XLSX]

## Sheet: TFs
subject_ids	CK_1h	CK_3h	CK_7h	S_1h	S_3h	S_7h	log2FC(S vs CK_1h)	log2FC(S vs CK_3h)	log2FC(S vs CK_7h)	swiss_prot	KEGG	KOG	nt		nr
i1_LQ_LWC_c20904/f1p47/1586	3.68333	5.86333	5.54	4.11667	3.23	5.74333	0.160465	-0.860187	0.0520023	{sp|Q1PFE1|AIL1_ARATH; AP2-like ethylene-responsive transcription factor AIL1 OS=Arabidopsis thaliana GN=AIL1 PE=2 SV=1}	{zma:103631785; K09285 OVM, ANT AP2-like factor, ANT lineage - -}	{NA}	{XM_004985454.1; PREDICTED: Setaria italica AP2-like ethylene-responsive transcription factor AIL5 (LOC101755546), mRNA}	AP2-ERF	{XP_004985511.1; PREDICTED: AP2-like ethylene-responsive transcription factor AIL5 [Setaria italica]}
i1_LQ_LWC_c4908/f1p3/1487	8.12333	7.56333	7.64667	9.16	3.47667	8.1	0.173276	-1.12132	0.0830909	{sp|Q94AN4|AP2L1_ARATH; AP2-like ethylene-responsive transcription factor At1g16060 OS=Arabidopsis thaliana GN=At1g16060 PE=2 SV=1}	{sita:101764942; K09285 OVM, ANT AP2-like factor, ANT lineage - -}	{NA}	{XM_004973513.2; PREDICTED: Setaria italica AP2-like ethylene-responsive transcription factor At2g41710 (LOC101756673), mRNA}	AP2-ERF	{XP_004973570.1; PREDICTED: AP2-like ethylene-responsive transcription factor At2g41710 [Setaria italica]}
i1_LQ_LWC_c6613/f1p0/1667	0	0	0	0	0	0.02	0	0	0	{sp|Q6J9N8|AIL7_ARATH; AP2-like ethylene-responsive transcription factor AIL7 OS=Arabidopsis thaliana GN=AIL7 PE=2 SV=2}	{bdi:100845569; K09285 OVM, ANT AP2-like factor, ANT lineage - -}	{NA}	{XM_004965625.2; PREDICTED: Setaria italica AP2-like ethylene-responsive transcription factor AIL5 (LOC101761227), mRNA}	AP2-ERF	{XP_004965682.1; PREDICTED: AP2-like ethylene-responsive transcription factor AIL5 [Setaria italica]}
i2_HQ_LWC_c22437/f2p0/2330	6.4	8.90333	6.33333	6.83	6.16333	10.5967	0.0938137	-0.530635	0.742574	{sp|Q6PQQ3|AIL5_ARATH; AP2-like ethylene-responsive transcription factor AIL5 OS=Arabidopsis thaliana GN=AIL5 PE=2 SV=2}	{sita:101767014; K09285 OVM, ANT AP2-like factor, ANT lineage - -}	{NA}	{XM_004960188.2; PREDICTED: Setaria italica AP2-like ethylene-responsive transcription factor AIL5 (LOC101767014), mRNA}	AP2-ERF	{XP_004960245.1; PREDICTED: AP2-like ethylene-responsive transcription factor AIL5 [Setaria italica]}
i2_LQ_LWC_c57868/f1p0/2057	0.373333	0.57	0.696667	0.416667	0.176667	0.473333	0.158429	-1.68993	-0.557612	{sp|Q38914|ANT_ARATH; AP2-like ethylene-responsive transcription factor ANT OS=Arabidopsis thaliana GN=ANT PE=1 SV=2}	{bdi:100841772; K09285 OVM, ANT AP2-like factor, ANT lineage - -}	{NA}	{XM_004985067.2; PREDICTED: Setaria italica AP2-like ethylene-responsive transcription factor ANT (LOC101778390), mRNA}	AP2-ERF-ANT	{XP_004985124.1; PREDICTED: AP2-like ethylene-responsive transcription factor ANT [Setaria italica]}
i2_LQ_LWC_c22325/f1p0/2486	6.87	8.68667	7.02333	4.43667	6.37	10.6767	-0.630834	-0.447509	0.604233	{sp|Q6PQQ4|BBM_ARATH; AP2-like ethylene-responsive transcription factor BBM OS=Arabidopsis thaliana GN=BBM PE=2 SV=2}	{sbi:SORBI_03g042810; K09285 OVM, ANT AP2-like factor, ANT lineage - -}	{NA}	{XM_004970871.1; PREDICTED: Setaria italica AP2-like ethylene-responsive transcription factor BBM2 (LOC101776233), mRNA}	AP2-ERF-BBM2	{XP_004970928.1; PREDICTED: AP2-like ethylene-responsive transcription factor BBM2 [Setaria italica]}
i2_LQ_LWC_c82810/f1p0/2345	6.80667	7.29	7.42667	6.4	3.69333	7.82	-0.0888766	-0.980995	0.0744538	{sp|P47927|AP2_ARATH; Floral homeotic protein APETALA 2 OS=Arabidopsis thaliana GN=AP2 PE=1 SV=1}	{bdi:100839861; K09284 AP2 AP2-like factor, euAP2 lineage - -}	{NA}	{XM_004981214.2; PREDICTED: Setaria italica AP2-like ethylene-responsive transcription factor TOE3 (LOC101772000), mRNA}	AP2-ERF-TOE3	{XP_004981271.1; PREDICTED: AP2-like ethylene-responsive transcription factor TOE3 [Setaria italica]}
i1_LQ_LWC_c18992/f1p1/1923	0.686667	0.65	0.52	0.823333	0.41	0.713333	0.261867	-0.664816	0.456065	{sp|O80674|BH106_ARATH; Transcription factor bHLH106 OS=Arabidopsis thaliana GN=BHLH106 PE=2 SV=1}	{sbi:SORBI_01g003830; - - - - -}	{At2g41130; KOG3561 Aryl-hydrocarbon receptor nuclear translocator K Transcription ;}	{XM_004981255.2; PREDICTED: Setaria italica transcription factor bHLH106-like (LOC101754448), mRNA}	bHLH106	{XP_004981312.1; PREDICTED: transcription factor bHLH106-like [Setaria italica]}
i1_LQ_LWC_c14498/f1p6/1445	22.8433	26.99	21.92	15.81	15.7267	25.08	-0.530936	-0.779212	0.19429	{sp|Q9LT67|BH113_ARATH; Transcription factor bHLH113 OS=Arabidopsis thaliana GN=BHLH113 PE=2 SV=1}	{egu:105038624; - - - - -}	{NA}	{XM_012847211.2; PREDICTED: Setaria italica transcription factor bHLH113-like (LOC101759001), transcript variant X1, mRNA}	bHLH113	{XP_012702665.1; PREDICTED: transcription factor bHLH113-like [Setaria italica]}
i2_LQ_LWC_c23902/f1p0/2516	0.266667	0.32	0.256667	0.206667	0.243333	0.383333	-0.367732	-0.395138	0.578704	{sp|Q9SN74|BH047_ARATH; Transcription factor bHLH47 OS=Arabidopsis thaliana GN=BHLH47 PE=1 SV=1}	{mus:103973851; - - - - -}	{NA}	{XM_004979578.2; PREDICTED: Setaria italica transcription factor bHLH121-like (LOC101759966), mRNA}	bHLH121	{XP_004979635.1; PREDICTED: transcription factor bHLH121-like [Setaria italica]}
i1_LQ_LWC_c16864/f1p0/1632	7.33667	2.18667	2.76667	11.1067	2.76333	3.07667	0.598229	0.337676	0.153219	{sp|Q8H102|BH128_ARATH; Transcription factor bHLH128 OS=Arabidopsis thaliana GN=BHLH128 PE=1 SV=1}	{osa:4325038; - - - - -}	{NA}	{XM_004970874.2; PREDICTED: Setaria italica transcription factor bHLH128-like (LOC101777326), mRNA}	bHLH128	{XP_004970931.1; PREDICTED: transcription factor bHLH128-like [Setaria italica]}
i1_LQ_LWC_c42201/f1p0/1048	2.31333	1.8	2.26667	1.17667	1.64	2.37	-0.975267	-0.134301	0.0643148	{sp|Q39204|MYC2_ARATH; Transcription factor MYC2 OS=Arabidopsis thaliana GN=MYC2 PE=1 SV=2}	{sbi:SORBI_07g025340; - - - - -}	{NA}	{XM_004974031.1; PREDICTED: Setaria italica transcription factor bHLH14-like (LOC101763717), mRNA}	bHLH14	{XP_004974088.1; PREDICTED: transcription factor bHLH14-like [Setaria italica]}
i1_LQ_LWC_c30510/f1p0/1951	0.256667	0.126667	0.12	0.206667	0.25	0.1	-0.31259	0.980891	-0.263034	{sp|Q9ASX9|BH144_ARATH; Transcription factor bHLH144 OS=Arabidopsis thaliana GN=BHLH144 PE=1 SV=1}	{sbi:SORBI_03g028550; - - - - -}	{NA}	{XM_004969169.2; PREDICTED: Setaria italica transcription factor bHLH144-like (LOC101756510), mRNA}	bHLH144	{XP_004969226.1; PREDICTED: transcription factor bHLH144-like [Setaria italica]}
i1_LQ_LWC_c21713/f1p0/1977	3.95667	12.8133	8.33	4.48	6.58	12.09	0.179213	-0.961486	0.537426	{sp|Q9T072|BH025_ARATH; Transcription factor bHLH25 OS=Arabidopsis thaliana GN=BHLH25 PE=2 SV=2}	{osa:4333965; - - - - -}	{NA}	{XM_014805755.1; PREDICTED: Setaria italica transcription factor bHLH18-like (LOC101762009), mRNA}	bHLH18	{XP_014661241.1; PREDICTED: transcription factor bHLH18-like [Setaria italica]}
i3_LQ_LWC_c9982/f1p0/3230	0	0.02	0	0	0	0	0	0	0	{sp|Q9T072|BH025_ARATH; Transcription factor bHLH25 OS=Arabidopsis thaliana GN=BHLH25 PE=2 SV=2}	{sbi:SORBI_01g012260; - - - - -}	{NA}	{XM_004984090.2; PREDICTED: Setaria italica transcription factor bHLH18-like (LOC101772425), mRNA}	bHLH18	{XP_004984147.2; PREDICTED: transcription factor bHLH18-like [Setaria italica]}
i1_LQ_LWC_c22620/f1p0/1896	0.116667	0.873333	1.35	0.596667	0.306667	0.823333	2.35453	-1.50986	-0.713411	{sp|Q9LTS4|BH041_ARATH; Putative transcription factor bHLH041 OS=Arabidopsis thaliana GN=BHLH41 PE=3 SV=1}	{obr:102710082; - - - - -}	{NA}	{XM_004968975.2; PREDICTED: Setaria italica putative transcription factor bHLH041 (LOC101780831), mRNA}	bHLH41	{XP_004969032.1; PREDICTED: putative transcription factor bHLH041 [Setaria italica]}
i1_HQ_LWC_c39571/f2p0/1388	42.2967	46.81	58	41.24	28.55	57.1967	-0.0364996	-0.713326	-0.0201218	{sp|Q9CAA9|BH049_ARATH; Transcription factor bHLH49 OS=Arabidopsis thaliana GN=BHLH49 PE=1 SV=1}	{sita:101760887; - - - - -}	{NA}	{XM_004957207.3; PREDICTED: Setaria italica transcription factor bHLH49-like (LOC101760887), mRNA}	bHLH49	{XP_004957264.1; PREDICTED: transcription factor bHLH49-like [Setaria italica]}
i1_LQ_LWC_c31826/f1p0/1753	0	0	0	0	0	0	0	0	0	{sp|Q9LK48|BH077_ARATH; Transcription factor bHLH77 OS=Arabidopsis thaliana GN=BHLH77 PE=1 SV=1}	{pop:POPTR_0002s23650g; - - - - -}	{NA}	{XM_012847995.2; PREDICTED: Setaria italica transcription factor bHLH62-like (LOC101753209), mRNA}	bHLH62	{XP_012703449.1; PREDICTED: transcription factor bHLH62-like [Setaria italica]}
i0_LQ_LWC_c744/f1p0/869	34.6067	6.28	4.99333	30.6667	4.37	9.16	-0.174379	-0.523131	0.875344	{sp|Q8GY61|BH063_ARATH; Transcription factor bHLH63 OS=Arabidopsis thaliana GN=BHLH63 PE=1 SV=1}	{sita:101754377; - - - - -}	{NA}	{XM_004953557.3; PREDICTED: Setaria italica transcription factor bHLH63 (LOC101754377), mRNA}	bHLH63	{XP_004953614.1; PREDICTED: transcription factor bHLH63 [Setaria italica]}
i1_LQ_LWC_c12659/f1p1/1681	0.43	0.23	0.3	0.12	0.14	0.41	-1.8413	-0.716207	0.450661	{sp|Q8S3D1|BH068_ARATH; Transcription factor bHLH68 OS=Arabidopsis thaliana GN=BHLH68 PE=2 SV=2}	{sita:101765300; - - - - -}	{NA}	{XM_012843224.1; PREDICTED: Setaria italica transcription factor bHLH68-like (LOC101765300), transcript variant X2, mRNA}	bHLH68	{XP_012698678.1; PREDICTED: transcription factor bHLH68-like isoform X2 [Setaria italica]}
i1_LQ_LWC_c36328/f1p21/1749	27.7267	38.8967	36.5033	29.0533	29.0967	44.3433	0.0674295	-0.418793	0.280689	{sp|Q9CAA9|BH049_ARATH; Transcription factor bHLH49 OS=Arabidopsis thaliana GN=BHLH49 PE=1 SV=1}	{sbi:SORBI_07g026610; - - - - -}	{NA}	{XM_004973876.2; PREDICTED: Setaria italica transcription factor bHLH78-like (LOC101769938), mRNA}	bHLH78	{XP_004973933.1; PREDICTED: transcription factor bHLH78-like [Setaria italica]}
i1_LQ_LWC_c19306/f1p7/1996	0.1	0.226667	0.906667	0.193333	0.276667	0.49	0.95109	0.287577	-0.88779	{NA}	{obr:102706528; - - - - -}	{NA}	{XM_012846165.1; PREDICTED: Setaria italica transcription factor bHLH92-like (LOC101781517), mRNA}	bHLH92	{XP_012701619.1; PREDICTED: transcription factor bHLH92-like [Setaria italica]}
i1_LQ_LWC_c39446/f2p0/1411	22.5633	24.9667	26.7833	17.9567	19.95	32.8667	-0.329461	-0.323614	0.29529	{sp|Q9LSL1|BH093_ARATH; Transcription factor bHLH93 OS=Arabidopsis thaliana GN=BHLH93 PE=1 SV=1}	{bdi:100846181; - - - - -}	{NA}	{XM_004966431.2; PREDICTED: Setaria italica transcription factor bHLH93-like (LOC101770156), transcript variant X2, mRNA}	bHLH93	{XP_004966488.1; PREDICTED: transcription factor bHLH93-like isoform X2 [Setaria italica]}
i1_HQ_LWC_c4240/f2p0/1723	2.05667	1.43	0.81	1.10333	1.22667	1.61	-0.898439	-0.221272	0.991067	{sp|Q56XR0|BH071_ARATH; Transcription factor bHLH71 OS=Arabidopsis thaliana GN=BHLH71 PE=1 SV=1}	{pda:103704696; - - - - -}	{NA}	{XM_004976590.2; PREDICTED: Setaria italica transcription factor bHLH96-like (LOC101754406), mRNA}	bHLH96	{XP_004976647.1; PREDICTED: transcription factor bHLH96-like [Setaria italica]}
i1_HQ_LWC_c4595/f4p1/1987	0	0.0466667	0	0	0	0	0	0	0	{sp|Q9CAA4|BIM2_ARATH; Transcription factor BIM2 OS=Arabidopsis thaliana GN=BIM2 PE=1 SV=1}	{sbi:SORBI_07g028860; - - - - -}	{NA}	{XM_004973706.1; PREDICTED: Setaria italica transcription factor BIM1-like (LOC101771138), mRNA}	BIM1	{XP_004973763.1; PREDICTED: transcription factor BIM1-like [Setaria italica]}
i1_LQ_LWC_c23539/f1p0/1729	4.54	10.7633	7.12667	4.22	6.74667	7.33667	-0.105449	-0.673878	0.0418973	{sp|Q9LEZ3|BIM1_ARATH; Transcription factor BIM1 OS=Arabidopsis thaliana GN=BIM1 PE=1 SV=2}	{sita:101779387; - - - - -}	{NA}	{XM_004953713.3; PREDICTED: Setaria italica transcription factor BIM2-like (LOC101779387), transcript variant X2, mRNA}	BIM2	{XP_004953770.1; PREDICTED: transcription factor BIM2-like isoform X2 [Setaria italica]}
i1_LQ_LWC_c25950/f1p4/1334	25.2067	19.6167	24.2833	38.02	9.73	20.2333	0.592953	-1.01157	-0.263232	{sp|Q9SMW7|BTF3_ARATH; Basic transcription factor 3 OS=Arabidopsis thaliana GN=BTF3 PE=1 SV=1}	{bdi:100836116; K01527 EGD1, BTF3 nascent polypeptide-associated complex subunit beta - ko04214; Cellular Processes; Cell growth and death; Apoptosis - fly}	{At1g73230; KOG2240 RNA polymerase II general transcription factor BTF3 and related proteins K Transcription ;}	{XM_004980975.2; PREDICTED: Setaria italica transcription factor BTF3-like (LOC101780379), mRNA}	BTF3	{XP_004981032.1; PREDICTED: transcription factor BTF3-like [Setaria italica]}
i1_HQ_LWC_c29681/f2p0/1990	6.08333	6.24333	8.14	8.26667	3.87667	8.13	0.442444	-0.6875	-0.00177344	{sp|Q6AU90|BZP39_ORYSJ; bZIP transcription factor 39 OS=Oryza sativa subsp. japonica GN=BZIP39 PE=2 SV=1}	{sita:101778763; - - - - -}	{NA}	{XM_004962036.2; PREDICTED: Setaria italica bZIP transcription factor 17-like (LOC101778763), mRNA}	bZIP17	{XP_004962093.1; PREDICTED: bZIP transcription factor 17-like [Setaria italica]}
i1_HQ_LWC_c19889/f2p2/1859	13.4667	8.06	9.85	8.46667	5.56667	8.55	-0.669527	-0.533966	-0.204199	{sp|O04682|PTI6_SOLLC; Pathogenesis-related genes transcriptional activator PTI6 OS=Solanum lycopersicum GN=PTI6 PE=2 SV=1}	{sita:101765518; - - - - -}	{NA}	{XM_004962409.2; PREDICTED: Setaria italica ethylene-responsive transcription factor CRF3-like (LOC101765518), mRNA}	CRF3	{XP_004962466.1; PREDICTED: ethylene-responsive transcription factor CRF3-like [Setaria italica]}
i2_LQ_LWC_c86875/f1p1/2414	1.23	1.24667	1.35667	1.81667	0.93	1.36	0.562635	-0.422773	0.00354036	{sp|Q9FNY2|DPB_ARATH; Transcription factor-like protein DPB OS=Arabidopsis thaliana GN=DPB PE=1 SV=1}	{osa:4331648; K04683 TFDP1 transcription factor Dp-1 - ko04350; Environmental Information Processing; Signal transduction; TGF-beta signaling pathway | ko04110; Cellular Processes; Cell growth and death; Cell cycle}	{At5g03410_2; KOG2829 E2F-like protein K Transcription ;}	{XM_004985611.3; PREDICTED: Setaria italica transcription factor-like protein DPB (LOC101782828), transcript variant X2, mRNA}	DBP	{XP_004985668.1; PREDICTED: transcription factor-like protein DPB isoform X2 [Setaria italica]}
i1_LQ_LWC_c10005/f1p13/1708	37.96	45.1433	36.1867	42.95	23.6333	46.74	0.178178	-0.93369	0.3692	{sp|Q8S9H7|DIV_ANTMA; Transcription factor DIVARICATA OS=Antirrhinum majus GN=DIVARICATA PE=2 SV=1}	{obr:102712018; - - - - -}	{At5g58900; KOG0724 Zuotin and related molecular chaperones (DnaJ superfamily), contains DNA-binding domains O Posttranslational modification, protein turnover, chaperones ;}	{XM_004968111.2; PREDICTED: Setaria italica transcription factor DIVARICATA (LOC101764484), mRNA}	DIVARICATA	{XP_004968168.1; PREDICTED: transcription factor DIVARICATA [Setaria italica]}
i1_LQ_LWC_c32095/f1p0/1426	46.9267	76.1633	55.2167	44.15	43.5267	57.5	-0.0879945	-0.807197	0.0584582	{sp|Q9FNN6|SRM1_ARATH; Transcription factor SRM1 OS=Arabidopsis thaliana GN=SRM1 PE=2 SV=1}	{sita:101770801; - - - - -}	{At5g08520; KOG0724 Zuotin and related molecular chaperones (DnaJ superfamily), contains DNA-binding domains O Posttranslational modification, protein turnover, chaperones ;}	{XM_004960021.2; PREDICTED: Setaria italica transcription factor DIVARICATA (LOC101770801), mRNA}	DIVARICATA	{XP_004960078.1; PREDICTED: transcription factor DIVARICATA [Setaria italica]}
i1_LQ_LWC_c34366/f1p6/1517	88.58	70.4267	61.24	92.6133	63.6233	78.7	0.0642389	-0.146566	0.361889	{sp|Q8S9H7|DIV_ANTMA; Transcription factor DIVARICATA OS=Antirrhinum majus GN=DIVARICATA PE=2 SV=1}	{obr:102717862; - - - - -}	{At5g58900; KOG0724 Zuotin and related molecular chaperones (DnaJ superfamily), contains DNA-binding domains O Posttranslational modification, protein turnover, chaperones ;}	{XM_004970555.3; PREDICTED: Setaria italica transcription factor DIVARICATA (LOC101755975), mRNA}	DIVARICATA	{XP_004970612.1; PREDICTED: transcription factor DIVARICATA [Setaria italica]}
i1_LQ_LWC_c12026/f1p0/1907	5.04667	1.64333	3.50333	3.1	2.39667	4.62667	-0.703063	0.544404	0.401245	{sp|Q9FNY0|E2FA_ARATH; Transcription factor E2FA OS=Arabidopsis thaliana GN=E2FA PE=1 SV=1}	{egu:105038300; K06620 E2F3 transcription factor E2F3 - ko04110; Cellular Processes; Cell growth and death; Cell cycle | ko05200; Human Diseases; Cancers: Overview; Pathways in cancer | ko05206; Human Diseases; Cancers: Overview; MicroRNAs in cancer | ko05212; Human Diseases; Cancers: Specific types; Pancreatic cancer | ko05214; Human Diseases; Cancers: Specific types; Glioma | ko05220; Human Dis…	{At2g36010; KOG2577 Transcription factor E2F/dimerization partner (TDP) K Transcription ;}	{XM_004977283.2; PREDICTED: Setaria italica transcription factor E2FA-like (LOC101754019), transcript variant X1, mRNA}	E2FA	{XP_004977340.1; PREDICTED: transcription factor E2FA-like isoform X1 [Setaria italica]}
i1_LQ_LWC_c12512/f1p0/2032	4.15	5.41667	4.7	3.71667	2.76333	4.42333	-0.159102	-0.970996	-0.0875268	{sp|Q9FV71|E2FB_ARATH; Transcription factor E2FB OS=Arabidopsis thaliana GN=E2FB PE=1 SV=1}	{obr:102713816; K06620 E2F3 transcription factor E2F3 - ko04110; Cellular Processes; Cell growth and death; Cell cycle | ko05200; Human Diseases; Cancers: Overview; Pathways in cancer | ko05206; Human Diseases; Cancers: Overview; MicroRNAs in cancer | ko05212; Human Diseases; Cancers: Specific types; Pancreatic cancer | ko05214; Human Diseases; Cancers: Specific types; Glioma | ko05220; Human Dis…	{At2g36010; KOG2577 Transcription factor E2F/dimerization partner (TDP) K Transcription ;}	{XM_004974947.3; PREDICTED: Setaria italica transcription factor E2FC-like (LOC101785985), mRNA}	E2FC	{XP_004975004.1; PREDICTED: transcription factor E2FC-like [Setaria italica]}
i1_LQ_LWC_c9082/f1p1/1597	7.05667	8.01	7.28	10.6633	6.23	7.12667	0.5956	-0.36257	-0.030711	{sp|Q8LSZ4|E2FE_ARATH; E2F transcription factor-like E2FE OS=Arabidopsis thaliana GN=E2FE PE=2 SV=1}	{sbi:SORBI_10g008800; - - - - -}	{At5g14960; KOG2578 Transcription factor E2F/dimerization partner (TDP)-like proteins K Transcription ;}	{XM_004966801.2; PREDICTED: Setaria italica E2F transcription factor-like E2FE (LOC101784328), mRNA}	E2FE	{XP_004966858.1; PREDICTED: E2F transcription factor-like E2FE [Setaria italica]}
i2_LQ_LWC_c107090/f1p1/2114	2.46	2.76	2.95333	2.06	2.7	3.50667	-0.256014	-0.0317089	0.247756	{sp|O65665|ERF60_ARATH; Ethylene-responsive transcription factor ERF060 OS=Arabidopsis thaliana GN=ERF060 PE=2 SV=1}	{sita:101781253; K09286 EREBP EREBP-like factor - -}	{NA}	{XM_004964924.1; PREDICTED: Setaria italica ethylene-responsive transcription factor RAP2-13-like (LOC101773917), mRNA}	EERF-RAP2-13	{XP_004964981.1; PREDICTED: ethylene-responsive transcription factor RAP2-13-like [Setaria italica]}
i2_LQ_LWC_c104677/f1p1/2891	6.56333	9.77667	9.02	4.45333	4.64333	9.4	-0.559543	-1.07418	0.0595333	{sp|Q9XIN0|LHW_ARATH; Transcription factor LHW OS=Arabidopsis thaliana GN=LHW PE=1 SV=1}	{sita:101783409; - - - - -}	{NA}	{XM_004953368.2; PREDICTED: Setaria italica transcription factor EMB1444-like (LOC101783409), mRNA}	EMB1444	{XP_004953425.1; PREDICTED: transcription factor EMB1444-like [Setaria italica]}
i1_LQ_LWC_c39098/f1p0/1441	11.3833	6.21	7.90333	15.8067	7.73333	9.18333	0.47361	0.316497	0.216557	{sp|Q8H1E4|RAP24_ARATH; Ethylene-responsive transcription factor RAP2-4 OS=Arabidopsis thaliana GN=RAP2-4 PE=1 SV=1}	{obr:102711243; K09286 EREBP EREBP-like factor - -}	{NA}	{XM_004985330.1; PREDICTED: Setaria italica ethylene-responsive transcription factor RAP2-13-like (LOC101777576), mRNA}	ERF-RAP2-13	{XP_004985387.1; PREDICTED: ethylene-responsive transcription factor RAP2-13-like [Setaria italica]}
i2_LQ_LWC_c90423/f1p3/2817	0.313333	0.426667	0.38	0.27	0.33	0.66	-0.214739	-0.370643	0.796467	{sp|Q9XI33|WIN1_ARATH; Ethylene-responsive transcription factor WIN1 OS=Arabidopsis thaliana GN=WIN1 PE=2 SV=1}	{sita:101764762; - - - - -}	{NA}	{XR_001164731.1; PREDICTED: Setaria italica uncharacterized LOC105915035 (LOC105915035), transcript variant X3, ncRNA}	ERF-WIN1	{XP_004951533.1; PREDICTED: ethylene-responsive transcription factor WIN1-like [Setaria italica]}
i1_LQ_LWC_c37745/f1p24/1102	3.06	2.54	2.78667	2.3	2.45	1.52667	-0.411898	-0.0520467	-0.868155	{sp|Q9LYD3|DREB3_ARATH; Dehydration-responsive element-binding protein 3 OS=Arabidopsis thaliana GN=DREB3 PE=2 SV=1}	{osa:4327064; K09286 EREBP EREBP-like factor - -}	{NA}	{XM_004968491.1; PREDICTED: Setaria italica ethylene-responsive transcription factor ERF039 (LOC101776627), mRNA}	ERF039	{XP_004968548.1; PREDICTED: ethylene-responsive transcription factor ERF039 [Setaria italica]}
i1_LQ_LWC_c10760/f1p0/1932	0.07	0.15	0.113333	0.236667	0	0.103333	1.75743	0	-0.133267	{sp|Q9FJQ2|ERF57_ARATH; Ethylene-responsive transcription factor ERF057 OS=Arabidopsis thaliana GN=ERF057 PE=2 SV=1}	{sita:101755201; K09286 EREBP EREBP-like factor - -}	{NA}	{XM_004956621.3; PREDICTED: Setaria italica ethylene-responsive transcription factor RAP2-13-like (LOC101755201), mRNA}	ERF13	{XP_004956678.1; PREDICTED: ethylene-responsive transcription factor RAP2-13-like [Setaria italica]}
i1_LQ_LWC_c13328/f1p0/1342	25.2333	14.7633	12.9833	23.9	10.6633	13.4533	-0.0783202	-0.46936	0.0513028	{sp|Q9LW50|ERF2_NICSY; Ethylene-responsive transcription factor 2 OS=Nicotiana sylvestris GN=ERF2 PE=2 SV=1}	{sita:101783166; K09286 EREBP EREBP-like factor - -}	{NA}	{XM_004956349.2; PREDICTED: Setaria italica ethylene-responsive transcription factor 2-like (LOC101783166), mRNA}	ERF2	{XP_004956406.1; PREDICTED: ethylene-responsive transcription factor 2-like [Setaria italica]}
i1_HQ_LWC_c2213/f2p0/1493	1301.08	692.557	414.997	1269.82	552.78	598.91	-0.0350931	-0.325227	0.529239	{sp|Q6K7E6|ERF1_ORYSJ; Ethylene-responsive transcription factor 1 OS=Oryza sativa subsp. japonica GN=EREBP1 PE=1 SV=1}	{osa:4331845; K09286 EREBP EREBP-like factor - -}	{NA}	{XM_004985412.1; PREDICTED: Setaria italica ethylene-responsive transcription factor RAP2-3-like (LOC101773791), transcript variant X1, mRNA}	ERF2-like	{XP_004985469.1; PREDICTED: ethylene-responsive transcription factor RAP2-3-like [Setaria italica]}
i1_LQ_LWC_c26287/f1p0/1195	33.6533	20.5167	18.55	31.3167	17.7067	22.8433	-0.103819	-0.212504	0.300354	{sp|Q9MAI5|ERF79_ARATH; Ethylene-responsive transcription factor 8 OS=Arabidopsis thaliana GN=ERF8 PE=2 SV=1}	{sita:101785275; K09286 EREBP EREBP-like factor - -}	{NA}	{XM_004951775.1; PREDICTED: Setaria italica ethylene-responsive transcription factor 3-like (LOC101785275), mRNA}	ERF3	{XP_004951832.1; PREDICTED: ethylene-responsive transcription factor 3-like [Setaria italica]}
i1_HQ_LWC_c18252/f2p0/1804	0	0	0	0	0	0	0	0	0	{sp|Q0JIC2|GAM1_ORYSJ; Transcription factor GAMYB OS=Oryza sativa subsp. japonica GN=GAM1 PE=2 SV=1}	{bdi:104582109; K09422 MYBP myb proto-oncogene protein, plant - -}	{At5g06100; KOG0048 Transcription factor, Myb superfamily K Transcription ;}	{XM_004966156.1; PREDICTED: Setaria italica transcription factor GAMYB (LOC101767992), transcript variant X1, mRNA}	GAMYB	{XP_004966214.1; PREDICTED: transcription factor GAMYB isoform X2 [Setaria italica]}
i2_LQ_LWC_c88854/f1p0/2208	14.1533	12.7933	12	16.2633	10.6167	12.0033	0.200481	#REF!	0.000400693	{sp|P69781|GAT12_ARATH; GATA transcription factor 12 OS=Arabidopsis thaliana GN=GATA12 PE=2 SV=1}	{osa:4326175; - - - - -}	{At5g25830; KOG1601 GATA-4/5/6 transcription factors K Transcription ;}	{XM_004969870.1; PREDICTED: Setaria italica GATA transcription factor 12 (LOC101761904), mRNA}	GATA12	{OEL30989.1; GATA transcription factor 12 [Dichanthelium oligosanthes]}
i1_LQ_LWC_c36813/f1p0/1755	31.1367	24.1133	21.0167	30.8567	20.4333	23.7133	-0.0130323	-0.238907	0.174165	{sp|O49741|GATA2_ARATH; GATA transcription factor 2 OS=Arabidopsis thaliana GN=GATA2 PE=2 SV=1}	{zma:103637652; - - - - -}	{At2g45050; KOG1601 GATA-4/5/6 transcription factors K Transcription ;}	{XM_004983621.1; PREDICTED: Setaria italica GATA transcription factor 2-like (LOC101753923), mRNA}	GATA2	{XP_004983678.1; PREDICTED: GATA transcription factor 2-like [Setaria italica]}
i1_HQ_LWC_c16703/f3p3/1604	40.22	35.25	31.9033	33.5633	23.9167	47.0467	-0.261027	-0.559607	0.560385	{sp|Q5Z4U5|GAT20_ORYSJ; GATA transcription factor 20 OS=Oryza sativa subsp. japonica GN=GATA20 PE=2 SV=1}	{bdi:100821872; - - - - -}	{At4g24470; KOG1601 GATA-4/5/6 transcription factors K Transcription ;}	{XM_004966067.2; PREDICTED: Setaria italica GATA transcription factor 24-like (LOC101766092), transcript variant X2, mRNA}	GATA24	{XP_004966124.1; PREDICTED: GATA transcription factor 24-like isoform X2 [Setaria italica]}
i1_LQ_LWC_c10053/f1p0/1604	110.447	45.85	38.8333	102.67	39.7367	43.5933	-0.105335	-0.206451	0.166812	{sp|Q9ZQ85|EFM_ARATH; Myb family transcription factor EFM OS=Arabidopsis thaliana GN=EFM PE=1 SV=2}	{obr:102710679; - - - - -}	{NA}	{XM_004981600.1; PREDICTED: Setaria italica probable transcription factor GLK1 (LOC101753232), mRNA}	GLK1	{XP_004981657.1; PREDICTED: probable transcription factor GLK1 [Setaria italica]}
i2_HQ_LWC_c53618/f4p0/2173	2.96667	7.24	6.95667	7.1	2.62333	6.42	1.25898	-1.46459	-0.115823	{sp|Q9LNC4|GTE4_ARATH; Transcription factor GTE4 OS=Arabidopsis thaliana GN=GTE4 PE=2 SV=1}	{zma:103649580; - - - - -}	{At1g06230; KOG1474 Transcription initiation factor TFIID, subunit BDF1 and related bromodomain proteins K Transcription ;}	{XM_004968562.1; PREDICTED: Setaria italica transcription factor GTE4-like (LOC101774886), mRNA}	GTE4	{XP_004968619.1; PREDICTED: transcription factor GTE4-like [Setaria italica]}
i1_HQ_LWC_c21954/f5p1/1914	14.0033	21.7667	13.0867	8.91333	11.4133	12.2533	-0.651733	-0.9314	-0.0949234	{sp|Q7Y214|GTE7_ARATH; Transcription factor GTE7 OS=Arabidopsis thaliana GN=GTE7 PE=2 SV=1}	{obr:102710015; - - - - -}	{At5g65630; KOG1474 Transcription initiation factor TFIID, subunit BDF1 and related bromodomain proteins K Transcription ;}	{XM_004976794.1; PREDICTED: Setaria italica transcription factor GTE7-like (LOC101768467), mRNA}	GTE7	{XP_004976851.1; PREDICTED: transcription factor GTE7-like [Setaria italica]}
i1_LQ_LWC_c18844/f1p0/2015	27.41	29.2967	35.1033	23.68	18.9967	30.1767	-0.211033	-0.62499	-0.218175	{sp|Q8H1D7|GTE5_ARATH; Transcription factor GTE5, chloroplastic OS=Arabidopsis thaliana GN=GTE5 PE=1 SV=1}	{obr:102710015; - - - - -}	{At1g17790; KOG1474 Transcription initiation factor TFIID, subunit BDF1 and related bromodomain proteins K Transcription ;}	{XM_004974315.3; PREDICTED: Setaria italica transcription factor GTE7-like (LOC101784905), partial mRNA}	GTE7	{XP_004974372.3; PREDICTED: transcription factor GTE7-like, partial [Setaria italica]}
i1_HQ_LWC_c19844/f2p2/1556	16.1733	14.5067	10.87	11.25	9.35667	9.55	-0.523692	-0.632649	-0.186779	{sp|P23922|HBP1A_WHEAT; Transcription factor HBP-1a OS=Triticum aestivum PE=2 SV=1}	{sita:101756519; K09060 GBF plant G-box-binding factor - -}	{NA}	{XM_004951969.3; PREDICTED: Setaria italica transcription factor HBP-1a-like (LOC101756519), mRNA}	HBP-1a	{XP_004952026.1; PREDICTED: transcription factor HBP-1a-like [Setaria italica]}
i1_HQ_LWC_c23518/f2p3/1737	26.32	31.5833	31.3933	23.9567	25.02	30.02	-0.135732	-0.336082	-0.0645342	{sp|Q84LG2|BZP68_ARATH; bZIP transcription factor 68 OS=Arabidopsis thaliana GN=BZIP68 PE=1 SV=1}	{sita:101753891; K09060 GBF plant G-box-binding factor - -}	{NA}	{XM_004960672.2; PREDICTED: Setaria italica transcription factor HBP-1a-like (LOC101753891), transcript variant X1, mRNA}	HBP-1a	{XP_004960729.1; PREDICTED: transcription factor HBP-1a-like [Setaria italica]}
i1_HQ_LWC_c2355/f7p4/1991	19.42	17.98	16.51	16.6167	10.2333	15.71	-0.224912	-0.813117	-0.0716569	{sp|Q501B2|BZP16_ARATH; bZIP transcription factor 16 OS=Arabidopsis thaliana GN=BZIP16 PE=1 SV=1}	{bdi:100827008; K09060 GBF plant G-box-binding factor - -}	{NA}	{XM_012843029.2; PREDICTED: Setaria italica transcription factor HBP-1a-like (LOC101784853), transcript variant X2, mRNA}	HBP-1a	{XP_004985057.1; PREDICTED: transcription factor HBP-1a-like [Setaria italica]}
i1_LQ_LWC_c11857/f1p0/1749	2.77667	1.68333	3.70333	3.43	4.65	5.31667	0.304855	1.46591	0.521698	{sp|Q7X993|TGA21_ORYSJ; Transcription factor TGA2.1 OS=Oryza sativa subsp. japonica GN=TGA2.1 PE=1 SV=1}	{sita:101767398; K14431 TGA transcription factor TGA - ko04075; Environmental Information Processing; Signal transduction; Plant hormone signal transduction}	{NA}	{XM_012844101.2; PREDICTED: Setaria italica transcription factor HBP-1b(c38) (LOC101767398), transcript variant X2, mRNA}	HBP-1b	{XP_004958749.1; PREDICTED: transcription factor HBP-1b(c38) isoform X2 [Setaria italica]}
i1_LQ_LWC_c19595/f1p10/2131	30.2367	24.0933	18.48	40.1233	19.8867	23.52	0.408142	-0.276833	0.347923	{sp|Q69T21|TGAL8_ORYSJ; Transcription factor TGAL8 OS=Oryza sativa subsp. japonica GN=TGAL8 PE=1 SV=1}	{atr:18439862; K14431 TGA transcription factor TGA - ko04075; Environmental Information Processing; Signal transduction; Plant hormone signal transduction}	{NA}	{XM_004965829.2; PREDICTED: Setaria italica transcription factor HBP-1b(c38)-like (LOC101774191), transcript variant X2, mRNA}	HBP-1b	{XP_004965886.1; PREDICTED: transcription factor HBP-1b(c38)-like isoform X2 [Setaria italica]}
i1_LQ_LWC_c21900/f2p0/1464	35.5767	39.9167	34.5967	31.78	24.9267	38.3767	-0.162812	-0.679301	0.149596	{sp|Q0JNL3|TGA23_ORYSJ; Transcription factor TGA2.3 OS=Oryza sativa subsp. japonica GN=TGA2.3 PE=1 SV=1}	{obr:102713217; K14431 TGA transcription factor TGA - ko04075; Environmental Information Processing; Signal transduction; Plant hormone signal transduction}	{NA}	{XM_012846506.2; PREDICTED: Setaria italica transcription factor HBP-1b(c38) (LOC101770845), transcript variant X2, mRNA}	HBP-1b	{XP_012701959.1; PREDICTED: transcription factor HBP-1b(c38) isoform X1 [Setaria italica]}
i1_LQ_LWC_c24325/f1p0/1907	4.48333	6.22333	5.69	1.80333	4.27	6.68667	-1.31391	-0.543451	0.232859	{sp|Q41558|HBP1C_WHEAT; Transcription factor HBP-1b(c1) (Fragment) OS=Triticum aestivum PE=1 SV=2}	{sbi:SORBI_03g037560; K14431 TGA transcription factor TGA - ko04075; Environmental Information Processing; Signal transduction; Plant hormone signal transduction}	{NA}	{XM_012845802.2; PREDICTED: Setaria italica transcription factor HBP-1b(c1)-like (LOC101771904), transcript variant X3, mRNA}	HBP-1b	{XP_004970302.1; PREDICTED: transcription factor HBP-1b(c1)-like [Setaria italica]}
i1_LQ_LWC_c33857/f1p5/1991	0.876667	2.03333	1.26333	0.513333	1.74333	2.14	-0.772132	-0.221998	0.760375	{sp|Q53Q70|TGAL4_ORYSJ; Transcription factor TGAL4 OS=Oryza sativa subsp. japonica GN=TGAL4 PE=1 SV=1}	{sbi:SORBI_08g003260; K14431 TGA transcription factor TGA - ko04075; Environmental Information Processing; Signal transduction; Plant hormone signal transduction}	{NA}	{XM_004978643.1; PREDICTED: Setaria italica transcription factor HBP-1b(c38)-like (LOC101755908), mRNA}	HBP-1b	{XP_004978700.1; PREDICTED: transcription factor HBP-1b(c38)-like [Setaria italica]}
i2_LQ_LWC_c64158/f1p0/2409	17.75	19.7433	12.7233	11.58	12.0967	15.4333	-0.616184	-0.706756	0.278573	{sp|Q6F2N0|TGAL5_ORYSJ; Transcription factor TGAL5 OS=Oryza sativa subsp. japonica GN=TGAL5 PE=1 SV=1}	{sita:101782105; K14431 TGA transcription factor TGA - ko04075; Environmental Information Processing; Signal transduction; Plant hormone signal transduction}	{NA}	{XM_004961869.2; PREDICTED: Setaria italica transcription factor HBP-1b(c38)-like (LOC101782105), transcript variant X1, mRNA}	HBP-1b	{XP_004961926.1; PREDICTED: transcription factor HBP-1b(c38)-like isoform X1 [Setaria italica]}
i2_LQ_LWC_c92997/f1p0/2068	26.3567	48.85	40.59	17.83	28.2067	47.5067	-0.563861	-0.792322	0.227006	{sp|Q53Q70|TGAL4_ORYSJ; Transcription factor TGAL4 OS=Oryza sativa subsp. japonica GN=TGAL4 PE=1 SV=1}	{sbi:SORBI_08g003260; K14431 TGA transcription factor TGA - ko04075; Environmental Information Processing; Signal transduction; Plant hormone signal transduction}	{NA}	{XM_004978643.1; PREDICTED: Setaria italica transcription factor HBP-1b(c38)-like (LOC101755908), mRNA}	HBP-1b	{XP_004978700.1; PREDICTED: transcription factor HBP-1b(c38)-like [Setaria italica]}
i1_HQ_LWC_c6023/f3p0/1761	12.44	10.78	9.59	14.22	11.9433	14.35	0.192935	0.147848	0.581448	{sp|Q94J16|HFA4B_ORYSJ; Heat stress transcription factor A-4b OS=Oryza sativa subsp. japonica GN=HSFA4B PE=2 SV=1}	{osa:4325556; K09414 HSF1 heat shock transcription factor 1 - ko04212; Organismal Systems; Aging; Longevity regulating pathway - worm | ko05134; Human Diseases; Infectious diseases: Bacterial; Legionellosis}	{At4g13980_2; KOG0627 Heat shock transcription factor K Transcription ;}	{EU492460.1; Pennisetum glaucum heat shock transcription factor mRNA, complete cds}	HSF	{ACA58566.1; heat shock transcription factor [Cenchrus americanus]}
i1_LQ_LWC_c18736/f1p1/1715	15.8367	12.7833	16.0933	22.8033	10.5733	13.8033	0.525976	-0.273834	-0.221446	{sp|Q6Z9C8|HFB2B_ORYSJ; Heat stress transcription factor B-2b OS=Oryza sativa subsp. japonica GN=HSFB2B PE=2 SV=1}	{sita:101752512; K09419 HSFF heat shock transcription factor, other eukaryote - -}	{At4g11660; KOG0627 Heat shock transcription factor K Transcription ;}	{XM_004974057.3; PREDICTED: Setaria italica heat stress transcription factor B-2b-like (LOC101775044), transcript variant X2, mRNA}	HSF	{XP_004974114.1; PREDICTED: heat stress transcription factor B-2b-like isoform X2 [Setaria italica]}
i1_HQ_LWC_c21251/f3p3/1745	16.84	16.16	17.7567	16.75	10.46	13.88	-0.00773104	-0.627544	-0.355353	{sp|Q10PR4|HSFA9_ORYSJ; Heat stress transcription factor A-9 OS=Oryza sativa subsp. japonica GN=HSFA9 PE=2 SV=1}	{dosa:Os03t0224700-01; K09419 HSFF heat shock transcription factor, other eukaryote - -}	{At4g17750; KOG0627 Heat shock transcription factor K Transcription ;}	{XM_004985093.1; PREDICTED: Setaria italica heat stress transcription factor A-9-like (LOC101754078), mRNA}	HSF A-9	{XP_004985150.1; PREDICTED: heat stress transcription factor A-9-like [Setaria italica]}
i2_LQ_LWC_c90147/f1p0/2328	3.85	1.65333	1.27667	9.21	1.73	1.68333	1.25834	0.0653944	0.398939	{sp|Q84MN7|HFA2A_ORYSJ; Heat stress transcription factor A-2a OS=Oryza sativa subsp. japonica GN=HSFA2A PE=2 SV=1}	{osa:4334080; K09419 HSFF heat shock transcription factor, other eukaryote - -}	{At3g22830; KOG0627 Heat shock transcription factor K Transcription ;}	{XM_012848675.2; PREDICTED: Setaria italica heat stress transcription factor A-2a-like (LOC105915063), mRNA}	HSF-A2a	{XP_012704129.1; PREDICTED: heat stress transcription factor A-2a-like [Setaria italica]}
i2_LQ_LWC_c4082/f1p0/2693	7.64333	16.62	9.86667	5.12333	7.49667	10.3167	-0.577119	-1.1486	0.0643422	{sp|Q6H6Q7|HSFA3_ORYSJ; Heat stress transcription factor A-3 OS=Oryza sativa subsp. japonica GN=HSFA3 PE=2 SV=1}	{sita:101771916; K09419 HSFF heat shock transcription factor, other eukaryote - -}	{At5g03720; KOG0627 Heat shock transcription factor K Transcription ;}	{XM_004952565.2; PREDICTED: Setaria italica heat stress transcription factor A-3-like (LOC101771916), mRNA}	HSF-A3	{XP_004952622.1; PREDICTED: heat stress transcription factor A-3-like [Setaria italica]}
i0_LQ_LWC_c947/f1p0/989	15.3333	8.17	12.1367	22.6867	7.11667	11.3633	0.565173	-0.199134	-0.0949861	{NA}	{dosa:Os01t0630300-01; - - - - -}	{NA}	{XM_004969186.3; PREDICTED: Setaria italica transcription factor IBH1-like (LOC101763280), mRNA}	IBH1-like	{XP_004969243.1; PREDICTED: transcription factor IBH1-like [Setaria italica]}
i2_LQ_LWC_c90172/f1p0/2729	0.0833333	0.1	0.14	0.0933333	0.0166667	0.22	0.163499	-2.58496	0.652077	{sp|Q9LSE2|ICE1_ARATH; Transcription factor ICE1 OS=Arabidopsis thaliana GN=SCRM PE=1 SV=1}	{sbi:SORBI_03g044660; - - - - -}	{NA}	{XM_004971094.1; PREDICTED: Setaria italica transcription factor ICE1-like (LOC101759762), mRNA}	ICE1	{XP_004971151.1; PREDICTED: transcription factor ICE1-like [Setaria italica]}
i1_LQ_LWC_c11710/f1p0/1877	46.1033	45.8033	37.24	38.3567	26.13	39.89	-0.265394	-0.809745	0.0991741	{sp|Q9FH37|ILR3_ARATH; Transcription factor ILR3 OS=Arabidopsis thaliana GN=ILR3 PE=1 SV=1}	{ats:F775_31340; - - - - -}	{NA}	{XM_004972835.3; PREDICTED: Setaria italica transcription factor ILR3 (LOC101769522), mRNA}	ILR3	{XP_004972892.1; PREDICTED: transcription factor ILR3 [Setaria italica]}
i1_LQ_LWC_c37910/f1p2/1185	284.19	207.31	130.827	284.663	168.257	154.513	0.00240089	-0.301126	0.240075	{sp|Q9FH37|ILR3_ARATH; Transcription factor ILR3 OS=Arabidopsis thaliana GN=ILR3 PE=1 SV=1}	{sita:101765514; - - - - -}	{NA}	{XM_004961830.2; PREDICTED: Setaria italica transcription factor ILR3-like (LOC101765514), mRNA}	ILR3	{XP_004961887.1; PREDICTED: transcription factor ILR3-like [Setaria italica]}
i1_LQ_LWC_c25741/f2p2/1239	0	0	0	0.1	0	0	0	0	0	{sp|Q6EU39|MADS6_ORYSJ; MADS-box transcription factor 6 OS=Oryza sativa subsp. japonica GN=MADS6 PE=1 SV=1}	{sita:101761927; K09264 K09264 MADS-box transcription factor, plant - -}	{At2g45650; KOG0014 MADS box transcription factor K Transcription ;}	{XM_004953402.3; PREDICTED: Setaria italica MADS-box transcription factor 6 (AGL6), mRNA}	MAD6	{XP_004953459.1; PREDICTED: MADS-box transcription factor 6 [Setaria italica]}
i1_HQ_LWC_c13491/f5p0/1603	0.273333	0.2	0.163333	0.326667	0.213333	0.266667	0.257158	0.0931094	0.707218	{sp|Q10CQ1|MAD14_ORYSJ; MADS-box transcription factor 14 OS=Oryza sativa subsp. japonica GN=MADS14 PE=1 SV=2}	{obr:102722380; K09264 K09264 MADS-box transcription factor, plant - -}	{At1g69120; KOG0014 MADS box transcription factor K Transcription ;}	{XM_004981683.2; PREDICTED: Setaria italica MADS-box transcription factor 14 (FUL1), transcript variant X1, mRNA}	MADS14	{XP_004981740.1; PREDICTED: MADS-box transcription factor 14 isoform X1 [Setaria italica]}
i1_LQ_LWC_c38613/f1p0/1374	0.58	0.13	0.196667	0.883333	0.203333	0.27	0.606905	0.645335	0.457207	{sp|Q6Q9I2|MAD15_ORYSJ; MADS-box transcription factor 15 OS=Oryza sativa subsp. japonica GN=MADS15 PE=1 SV=2}	{sita:101771011; K09264 K09264 MADS-box transcription factor, plant - -}	{At1g69120; KOG0014 MADS box transcription factor K Transcription ;}	{XM_004955268.2; PREDICTED: Setaria italica MADS-box transcription factor 15 (FUL2), mRNA}	MADS15	{XP_004955325.1; PREDICTED: MADS-box transcription factor 15 [Setaria italica]}
i1_LQ_LWC_c38425/f1p0/1194	8.22667	10.9233	9.11333	12.9833	6.59667	9.87667	0.658281	-0.727604	0.116045	{sp|Q0D4T4|MAD18_ORYSJ; MADS-box transcription factor 18 OS=Oryza sativa subsp. japonica GN=MADS18 PE=1 SV=1}	{sita:101776296; K09264 K09264 MADS-box transcription factor, plant - -}	{At1g69120; KOG0014 MADS box transcription factor K Transcription ;}	{XM_004958191.1; PREDICTED: Setaria italica MADS-box transcription factor 18-like (LOC101776296), mRNA}	MADS18	{XP_004958248.1; PREDICTED: MADS-box transcription factor 18-like [Setaria italica]}
i1_LQ_LWC_c38089/f1p0/1222	35.0567	27.88	32.82	40.35	16.8767	39.6233	0.20288	-0.724201	0.271775	{sp|Q9XJ66|MAD22_ORYSJ; MADS-box transcription factor 22 OS=Oryza sativa subsp. japonica GN=MADS22 PE=2 SV=1}	{sita:101766409; - - - - -}	{At2g22540; KOG0014 MADS box transcription factor K Transcription ;}	{XM_004953941.3; PREDICTED: Setaria italica MADS-box transcription factor 22 (LOC101766409), mRNA}	MADS22	{XP_004953998.1; PREDICTED: MADS-box transcription factor 22 [Setaria italica]}
i5_LQ_LWC_c3462/f1p1/5719	0.383333	0.363333	0.273333	0.413333	0.286667	0.376667	0.108706	-0.34192	0.462627	{sp|Q6EP49|MAD27_ORYSJ; MADS-box transcription factor 27 OS=Oryza sativa subsp. japonica GN=MADS27 PE=2 SV=2}	{nnu:104595549; - - - - -}	{At4g37940; KOG0014 MADS box transcription factor K Transcription ;}	{XM_002445493.1; Sorghum bicolor hypothetical protein, mRNA}	MADS27	{OEL24288.1; MADS-box transcription factor 27 [Dichanthelium oligosanthes]}
i2_LQ_LWC_c38394/f1p1/2422	1.06333	1.14	1.25667	0.8	0.566667	1.41	-0.410522	-1.00846	0.166093	{NA}	{NA}	{NA}	{XM_015787576.1; PREDICTED: Oryza sativa Japonica Group disease resistance protein RPM1 (LOC4340190), transcript variant X2, mRNA}	MADS31	{XP_004976800.1; PREDICTED: MADS-box transcription factor 31-like [Setaria italica]}
i2_LQ_LWC_c85666/f1p1/2171	2.14667	1.61	1.01333	2.67667	1.04333	1.82333	0.318339	-0.625861	0.84747	{sp|Q84NC2|MAD31_ORYSJ; MADS-box transcription factor 31 OS=Oryza sativa subsp. japonica GN=MADS31 PE=2 SV=1}	{obr:102714733; - - - - -}	{At5g23260; KOG0014 MADS box transcription factor K Transcription ;}	{XM_004976743.1; PREDICTED: Setaria italica MADS-box transcription factor 31-like (LOC101780468), mRNA}	MADS31	{XP_004976800.1; PREDICTED: MADS-box transcription factor 31-like [Setaria italica]}
i2_LQ_LWC_c19264/f1p0/2346	0.246667	0.3	0.456667	0.453333	0.176667	0.24	0.878009	-0.763933	-0.928107	{sp|Q8S151|MAD32_ORYSJ; MADS-box transcription factor 32 OS=Oryza sativa subsp. japonica GN=MADS32 PE=2 SV=1}	{obr:102721318; - - - - -}	{At3g54340; KOG0014 MADS box transcription factor K Transcription ;}	{XM_004969753.2; PREDICTED: Setaria italica MADS-box transcription factor 32 (LOC101784476), transcript variant X2, mRNA}	MADS32	{XP_004969809.1; PREDICTED: MADS-box transcription factor 32 isoform X1 [Setaria italica]}
i1_HQ_LWC_c25811/f2p0/1210	77.0833	70.8567	89.91	69.3433	38.6033	111.763	-0.152662	-0.876178	0.313893	{sp|Q5K4R0|MAD47_ORYSJ; MADS-box transcription factor 47 OS=Oryza sativa subsp. japonica GN=MADS47 PE=1 SV=2}	{osa:4331872; - - - - -}	{At2g22540; KOG0014 MADS box transcription factor K Transcription ;}	{XM_004985382.2; PREDICTED: Setaria italica MADS-box transcription factor 47-like (LOC101761485), transcript variant X4, mRNA}	MADS47	{XP_004985436.1; PREDICTED: MADS-box transcription factor 47-like isoform X1 [Setaria italica]}
i4_LQ_LWC_c32900/f1p0/4180	0	0	0.01	0	0	0	0	0	0	{sp|A2Y9P0|MADS5_ORYSI; MADS-box transcription factor 5 OS=Oryza sativa subsp. indica GN=MADS5 PE=2 SV=1}	{ats:F775_27416; - - - - -}	{At5g15800; KOG0014 MADS box transcription factor K Transcription ;}	{JN661597.1; Cenchrus americanus MADS5-like protein (OSM5) mRNA, partial cds}	MADS5	{XP_004964768.1; PREDICTED: MADS-box transcription factor 5-like [Setaria italica]}
i1_LQ_LWC_c13925/f1p0/1120	21.4367	16.56	20.9167	20.1267	12.9567	20.0833	-0.0909723	-0.354008	-0.0586542	{sp|Q9XJ60|MAD50_ORYSJ; MADS-box transcription factor 50 OS=Oryza sativa subsp. japonica GN=MADS50 PE=2 SV=1}	{obr:102720685; - - - - -}	{At2g45660; KOG0014 MADS box transcription factor K Transcription ;}	{XM_004985863.3; PREDICTED: Setaria italica MADS-box transcription factor 50 (LOC101777581), transcript variant X4, mRNA}	MADS50	{XP_004985919.1; PREDICTED: MADS-box transcription factor 50 isoform X2 [Setaria italica]}
i1_LQ_LWC_c13479/f1p0/1311	0.22	0.156667	0.773333	0.326667	0.216667	0.383333	0.570316	0.467779	-1.01249	{sp|Q2V0P1|MAD58_ORYSJ; MADS-box transcription factor 58 OS=Oryza sativa subsp. japonica GN=MADS58 PE=2 SV=1}	{sita:101767547; K09264 K09264 MADS-box transcription factor, plant - -}	{At4g18960; KOG0014 MADS box transcription factor K Transcription ;}	{XM_004960542.1; PREDICTED: Setaria italica MADS-box transcription factor 58 (LOC101767547), mRNA}	MADS58	{XP_004960599.1; PREDICTED: MADS-box transcription factor 58 [Setaria italica]}
i1_LQ_LWC_c26705/f1p0/1115	0	0	0	0	0	0	0	0	0	{sp|Q0J466|MADS7_ORYSJ; MADS-box transcription factor 7 OS=Oryza sativa subsp. japonica GN=MADS7 PE=1 SV=2}	{sita:101771024; - - - - -}	{At5g15800; KOG0014 MADS box transcription factor K Transcription ;}	{XM_004973946.1; PREDICTED: Setaria italica MADS-box transcription factor 7-like (LOC101762495), mRNA}	MADS7	{XP_004974003.1; PREDICTED: MADS-box transcription factor 7-like [Setaria italica]}
i1_LQ_LWC_c39452/f2p0/1301	8.79	7.24667	7.67667	9.38667	5.73	8.24667	0.0947498	-0.338782	0.103331	{sp|Q9SAK5|APL_ARATH; Myb family transcription factor APL OS=Arabidopsis thaliana GN=APL PE=1 SV=2}	{sita:101782452; - - - - -}	{NA}	{XM_004951691.2; PREDICTED: Setaria italica myb family transcription factor APL (LOC101782452), mRNA}	MYB-APL	{XP_004951748.1; PREDICTED: myb family transcription factor APL [Setaria italica]}
i1_LQ_LWC_c32176/f1p5/1528	2.28667	3.33667	2.70333	1.75667	2.04667	3.67	-0.380406	-0.705131	0.441041	{sp|Q9SAK5|APL_ARATH; Myb family transcription factor APL OS=Arabidopsis thaliana GN=APL PE=1 SV=2}	{sita:101782452; - - - - -}	{NA}	{XM_012845370.2; PREDICTED: Setaria italica myb family transcription factor APL-like (LOC101773784), mRNA}	MYB-APL	{XP_012700824.1; PREDICTED: myb family transcription factor APL-like [Setaria italica]}
i1_HQ_LWC_c4046/f2p0/1642	105.34	24.16	22.7567	53.86	26.54	22.8033	-0.967767	0.135548	0.00295548	{sp|Q9ZQ85|EFM_ARATH; Myb family transcription factor EFM OS=Arabidopsis thaliana GN=EFM PE=1 SV=2}	{zma:103640508; - - - - -}	{NA}	{XM_004962969.2; PREDICTED: Setaria italica transcription factor PCL1-like (LOC101773071), transcript variant X1, mRNA}	MYB-EFM	{OEL22877.1; Myb family transcription factor EFM [Dichanthelium oligosanthes]}
i1_LQ_LWC_c22547/f1p0/1875	1.99333	2.7	2.08333	1.44	1.58333	2.17	-0.469114	-0.769994	0.0588014	{sp|Q9FGY3|MYB78_ARATH; Transcription factor MYB78 OS=Arabidopsis thaliana GN=MYB78 PE=2 SV=1}	{ats:F775_08129; K09422 MYBP myb proto-oncogene protein, plant - -}	{At5g49620; KOG0048 Transcription factor, Myb superfamily K Transcription ;}	{XM_004979936.2; PREDICTED: Setaria italica transcription factor MYB108 (LOC101771445), mRNA}	MYB108	{XP_004979993.1; PREDICTED: transcription factor MYB108 [Setaria italica]}
i1_LQ_LWC_c34468/f1p0/1535	1.25667	1.75	1.68667	1.78	0.896667	1.64667	0.502275	-0.964711	-0.0346263	{sp|Q6R053|MYB56_ARATH; Transcription factor MYB56 OS=Arabidopsis thaliana GN=MYB56 PE=1 SV=1}	{sbi:SORBI_03g010960; K09422 MYBP myb proto-oncogene protein, plant - -}	{At1g69560; KOG0048 Transcription factor, Myb superfamily K Transcription ;}	{XM_004967647.1; PREDICTED: Setaria italica myb-related protein Myb4-like (LOC101783781), mRNA}	MYB44	{OEL23487.1; Transcription factor MYB44 [Dichanthelium oligosanthes]}
i1_LQ_LWC_c4587/f1p0/1559	26.8033	16.4267	28.2767	30.79	12.2367	28.0967	0.200049	-0.424829	-0.00921308	{sp|Q9FDW1|MYB44_ARATH; Transcription factor MYB44 OS=Arabidopsis thaliana GN=MYB44 PE=2 SV=1}	{sita:101769643; K09422 MYBP myb proto-oncogene protein, plant - -}	{At5g67300; KOG0048 Transcription factor, Myb superfamily K Transcription ;}	{XM_004951573.1; PREDICTED: Setaria italica transcription factor MYB44-like (LOC101769643), mRNA}	MYB44	{XP_004951630.1; PREDICTED: transcription factor MYB44-like [Setaria italica]}
i1_HQ_LWC_c12727/f2p2/1645	293.7	214.853	172.907	193.57	104.68	243.883	-0.601488	-1.03737	0.496198	{sp|Q4JL84|MYB59_ARATH; Transcription factor MYB59 OS=Arabidopsis thaliana GN=MYB59 PE=2 SV=2}	{sita:101761709; K09422 MYBP myb proto-oncogene protein, plant - -}	{At5g59780; KOG0048 Transcription factor, Myb superfamily K Transcription ;}	{XM_014804822.1; PREDICTED: Setaria italica transcription factor MYB59-like (LOC101761709), transcript variant X1, mRNA}	MYB59	{XP_014660308.1; PREDICTED: transcription factor MYB59-like [Setaria italica]}
i2_LQ_LWC_c39630/f1p0/2177	4.19333	5.39333	4.26	3.99	4.30667	4.87333	-0.0717088	-0.324606	0.194055	{sp|Q9S7L2|MYB98_ARATH; Transcription factor MYB98 OS=Arabidopsis thaliana GN=MYB98 PE=2 SV=1}	{zma:103644185; K09422 MYBP myb proto-oncogene protein, plant - -}	{At4g18770; KOG0048 Transcription factor, Myb superfamily K Transcription ;}	{XM_004986129.2; PREDICTED: Setaria italica transcription factor MYB46-like (LOC101758116), mRNA}	MYB98	{OEL19496.1; Transcription factor MYB98 [Dichanthelium oligosanthes]}
i1_LQ_LWC_c21904/f1p2/1672	15.7033	15.3167	16.0567	14.38	10.7867	15.27	-0.127007	-0.505853	-0.0724724	{sp|Q9FKF9|M5162_ARATH; Probable transcription factor At5g61620 OS=Arabidopsis thaliana GN=At5g61620 PE=3 SV=1}	{bvg:104892779; - - - - -}	{NA}	{XM_004972813.2; PREDICTED: Setaria italica transcription factor MYB1R1-like (LOC101760048), mRNA}	MYBIR1	{XP_004972870.1; PREDICTED: transcription factor MYB1R1-like [Setaria italica]}
i1_LQ_LWC_c31589/f1p1/1513	76.83	114.283	67.5167	48.6233	67.94	101.853	-0.660021	-0.750282	0.593178	{sp|Q2V9B0|MY1R1_SOLTU; Transcription factor MYB1R1 OS=Solanum tuberosum PE=2 SV=1}	{sita:101757925; - - - - -}	{NA}	{XM_004960855.1; PREDICTED: Setaria italica transcription factor MYB1R1-like (LOC101757925), mRNA}	MYBIR1	{XP_004960912.1; PREDICTED: transcription factor MYB1R1-like [Setaria italica]}
i1_LQ_LWC_c37875/f1p0/1309	74.2967	43.1333	26.77	50.5267	43.2367	40.6167	-0.556252	0.00345209	0.601455	{sp|Q8S9H7|DIV_ANTMA; Transcription factor DIVARICATA OS=Antirrhinum majus GN=DIVARICATA PE=2 SV=1}	{bdi:100839820; - - - - -}	{NA}	{XM_004969032.1; PREDICTED: Setaria italica transcription factor MYB1R1-like (LOC101770038), mRNA}	MYBIR1	{XP_004969089.1; PREDICTED: transcription factor MYB1R1-like [Setaria italica]}
i1_LQ_LWC_c14472/f1p0/1395	0	0	0	11.97	6.47	11.6967	0	0	0	{sp|Q9FY93|NAC83_ARATH; NAC domain-containing protein 83 OS=Arabidopsis thaliana GN=NAC083 PE=1 SV=1}	{zma:103650824; - - - - -}	{NA}	{XM_004971069.3; PREDICTED: Setaria italica NAC domain-containing protein 83-like (LOC101783799), transcript variant X2, mRNA}	NAC	{OEL34183.1; NAC transcription factor ONAC010 [Dichanthelium oligosanthes]}
i1_LQ_LWC_c16364/f1p0/1884	0	0	0	0	0	0	0	0	0	{sp|A0SPJ6|NAMB2_TRITD; NAC transcription factor NAM-B2 OS=Triticum turgidum subsp. durum GN=NAM-B2 PE=2 SV=1}	{sita:101766170; - - - - -}	{NA}	{XM_004957999.1; PREDICTED: Setaria italica NAC transcription factor NAM-B2 (LOC101766170), mRNA}	NAC	{XP_004958056.1; PREDICTED: NAC transcription factor NAM-B2 [Setaria italica]}
i1_LQ_LWC_c33255/f1p6/1970	0.943333	1.85333	2.10667	1.43	1.34667	3.06	0.600176	-0.46073	0.53857	{sp|Q9LD44|NAC56_ARATH; NAC transcription factor 56 OS=Arabidopsis thaliana GN=NAC056 PE=2 SV=1}	{pda:103709106; - - - - -}	{NA}	{XM_004977363.3; PREDICTED: Setaria italica NAC domain-containing protein 67-like (LOC101786404), mRNA}	NAC	{AET07181.1; NAC transcription factor [Panicum virgatum]}
i1_LQ_LWC_c7526/f1p0/1822	0.75	0.713333	0.753333	0.393333	0.69	1.36667	-0.931138	-0.04798	0.859301	{sp|Q8H4S4|NAC10_ORYSJ; NAC transcription factor ONAC010 OS=Oryza sativa subsp. japonica GN=ONAC010 PE=2 SV=1}	{pda:103702204; - - - - -}	{NA}	{XM_004977363.3; PREDICTED: Setaria italica NAC domain-containing protein 67-like (LOC101786404), mRNA}	NAC	{AET07181.1; NAC transcription factor [Panicum virgatum]}
i1_LQ_LWC_c11891/f1p12/1718	1.86333	1.5	1.48333	2.38	0.73	1.42333	0.353076	-1.03899	-0.0595693	{sp|Q65XK1|NFYB4_ORYSJ; Nuclear transcription factor Y subunit B-4 OS=Oryza sativa subsp. japonica GN=NFYB4 PE=2 SV=2}	{sita:101782383; K08065 NFYB nuclear transcription Y subunit beta - ko04612; Organismal Systems; Immune system; Antigen processing and presentation | ko05152; Human Diseases; Infectious diseases: Bacterial; Tuberculosis | ko05166; Human Diseases; Infectious diseases: Viral; HTLV-I infection}	{At2g37060; KOG0869 CCAAT-binding factor, subunit A (HAP3) K Transcription ;}	{XM_012844395.1; PREDICTED: Setaria italica nuclear transcription factor Y subunit B-4-like (LOC101782383), mRNA}	NTF	{OEL33886.1; Nuclear transcription factor Y subunit B-4 [Dichanthelium oligosanthes]}
i1_LQ_LWC_c13309/f1p0/1219	22.2133	39.1	37.1833	20.11	21.8367	38.1567	-0.143513	-0.840416	0.037279	{sp|Q655V5|NFYC4_ORYSJ; Nuclear transcription factor Y subunit C-4 OS=Oryza sativa subsp. japonica GN=NFYC4 PE=1 SV=1}	{obr:102704484; K08066 NFYC nuclear transcription factor Y, gamma - ko04612; Organismal Systems; Immune system; Antigen processing and presentation | ko05152; Human Diseases; Infectious diseases: Bacterial; Tuberculosis}	{At1g56170; KOG1657 CCAAT-binding factor, subunit C (HAP5) K Transcription ;}	{XM_004966261.3; PREDICTED: Setaria italica nuclear transcription factor Y subunit C-2-like (LOC101776080), mRNA}	NTF	{XP_004966318.1; PREDICTED: nuclear transcription factor Y subunit C-2-like [Setaria italica]}
i1_LQ_LWC_c14338/f1p1/1278	33.5067	44.2067	35.4933	29.7833	29.0633	39.6267	-0.169943	-0.605064	0.158924	{sp|Q9LVJ7|NFYA6_ARATH; Nuclear transcription factor Y subunit A-6 OS=Arabidopsis thaliana GN=NFYA6 PE=2 SV=1}	{obr:102719750; K08064 NFYA nuclear transcription factor Y, alpha - ko04612; Organismal Systems; Immune system; Antigen processing and presentation | ko05152; Human Diseases; Infectious diseases: Bacterial; Tuberculosis}	{At3g14020; KOG1561 CCAAT-binding factor, subunit B (HAP2) K Transcription ;}	{XM_004983989.3; PREDICTED: Setaria italica nuclear transcription factor Y subunit A-4-like (LOC101767581), transcript variant X3, mRNA}	NTF	{XP_004984046.1; PREDICTED: nuclear transcription factor Y subunit A-4-like isoform X2 [Setaria italica]}
i1_LQ_LWC_c25840/f1p1/1079	38.0233	30.9133	21.88	24.2933	17.1267	24.3233	-0.646325	-0.851985	0.152728	{sp|Q93ZH2|NFYA3_ARATH; Nuclear transcription factor Y subunit A-3 OS=Arabidopsis thaliana GN=NFYA3 PE=2 SV=2}	{sbi:SORBI_01g045500; K08064 NFYA nuclear transcription factor Y, alpha - ko04612; Organismal Systems; Immune system; Antigen processing and presentation | ko05152; Human Diseases; Infectious diseases: Bacterial; Tuberculosis}	{At1g72830; KOG1561 CCAAT-binding factor, subunit B (HAP2) K Transcription ;}	{XM_004985460.3; PREDICTED: Setaria italica nuclear transcription factor Y subunit A-7 (LOC101757571), transcript variant X3, mRNA}	NTF	{XP_004985517.1; PREDICTED: nuclear transcription factor Y subunit A-7 isoform X3 [Setaria italica]}
i1_LQ_LWC_c22131/f1p5/1616	0.113333	0	1.81	0	0	0	0	0	0	{sp|Q8LT05|PCF7_ORYSJ; Transcription factor PCF7 OS=Oryza sativa subsp. japonica GN=PCF7 PE=2 SV=2}	{dosa:Os01t0755500-01; - - - - -}	{NA}	{XM_004972124.1; PREDICTED: Setaria italica transcription factor PCF7-like (LOC101771780), mRNA}	PCF7	{XP_004972181.1; PREDICTED: transcription factor PCF7-like [Setaria italica]}
i2_LQ_LWC_c6147/f1p0/2627	0.736667	0.85	1.30667	1.39	0.44	0.903333	0.916001	-0.949959	-0.532561	{sp|A2ZMR9|PCF8_ORYSI; Transcription factor PCF8 OS=Oryza sativa subsp. indica GN=PCF8 PE=4 SV=1}	{sita:101773896; - - - - -}	{NA}	{XM_004963152.2; PREDICTED: Setaria italica transcription factor PCF8 (LOC101773896), mRNA}	PCF8	{XP_004963209.1; PREDICTED: transcription factor PCF8 [Setaria italica]}
i1_LQ_LWC_c9837/f1p0/1796	34.73	43.9467	34.6367	28.1333	33.2467	39.74	-0.303902	-0.402544	0.198292	{sp|Q9SNB4|PCL1_ARATH; Transcription factor LUX OS=Arabidopsis thaliana GN=LUX PE=1 SV=1}	{sita:101777681; - - - - -}	{NA}	{XM_004962033.2; PREDICTED: Setaria italica transcription factor PCL1 (LOC101777681), mRNA}	PCL1	{XP_004962090.1; PREDICTED: transcription factor PCL1 [Setaria italica]}
i1_LQ_LWC_c34059/f1p0/1878	0	0	0	0	0	0	0	0	0	{sp|Q8GZM7|PIF1_ARATH; Transcription factor PIF1 OS=Arabidopsis thaliana GN=PIF1 PE=1 SV=1}	{ats:F775_16112; K16189 PIF4 phytochrome-interacting factor 4 - ko04075; Environmental Information Processing; Signal transduction; Plant hormone signal transduction}	{NA}	{XM_004982294.2; PREDICTED: Setaria italica transcription factor PIF1-like (LOC101760676), transcript variant X3, mRNA}	PIF1	{XP_004982351.1; PREDICTED: transcription factor PIF1-like isoform X3 [Setaria italica]}
i2_LQ_LWC_c83983/f1p0/2153	3.49667	1.3	2.02667	2.72	0.73	1.02	-0.362374	-0.832543	-0.99054	{sp|Q84LH8|PIF5_ARATH; Transcription factor PIF5 OS=Arabidopsis thaliana GN=PIF5 PE=1 SV=1}	{zma:100384229; K16189 PIF4 phytochrome-interacting factor 4 - ko04075; Environmental Information Processing; Signal transduction; Plant hormone signal transduction}	{NA}	{XM_004981482.3; PREDICTED: Setaria italica transcription factor PIF4-like (LOC101775649), transcript variant X1, mRNA}	PIF4	{XP_004981539.1; PREDICTED: transcription factor PIF4-like isoform X1 [Setaria italica]}
i3_LQ_LWC_c19003/f1p0/3244	22.9	21.6667	21.1767	18.1633	12.0667	21.4467	-0.334319	-0.84445	0.0182779	{sp|Q9SKZ1|PUR_ARATH; Transcription factor Pur-alpha 1 OS=Arabidopsis thaliana GN=PURA1 PE=1 SV=2}	{obr:102718605; - - - - -}	{At2g32080; KOG3074 Transcriptional regulator of the PUR family, single-stranded-DNA-binding K Transcription ;}	{XM_012845717.2; PREDICTED: Setaria italica transcription factor Pur-alpha 1 (LOC101785801), transcript variant X1, mRNA}	Pur-alpha1	{XP_012701171.1; PREDICTED: transcription factor Pur-alpha 1 isoform X1 [Setaria italica]}
i1_LQ_LWC_c8193/f1p5/1661	7.83667	3.31667	3.92	5.97333	1.95333	2.24333	-0.391704	-0.763796	-0.80521	{sp|Q69IL4|RF2A_ORYSJ; Transcription factor RF2a OS=Oryza sativa subsp. japonica GN=RF2a PE=1 SV=1}	{sita:101761959; - - - - -}	{NA}	{XM_004957297.2; PREDICTED: Setaria italica transcription factor RF2a-like (LOC101761959), transcript variant X1, mRNA}	RF2a	{XP_004957354.1; PREDICTED: transcription factor RF2a-like [Setaria italica]}
i1_LQ_LWC_c35023/f1p1/1707	0	0	7.02667	0	0	0.0133333	0	0	-9.04166	{sp|Q9FME3|TCP5_ARATH; Transcription factor TCP5 OS=Arabidopsis thaliana GN=TCP5 PE=1 SV=1}	{sita:101757931; - - - - -}	{NA}	{XM_004961464.2; PREDICTED: Setaria italica transcription factor TCP13-like (LOC101757931), transcript variant X1, mRNA}	TCP13	{XP_004961521.1; PREDICTED: transcription factor TCP13-like isoform X1 [Setaria italica]}
i1_LQ_LWC_c30278/f1p0/1785	5.04667	6.90333	5.76	3.41333	4.24667	7.57	-0.564149	-0.700962	0.394224	{sp|Q9C9L2|TCP15_ARATH; Transcription factor TCP15 OS=Arabidopsis thaliana GN=TCP15 PE=1 SV=1}	{osa:4330722; - - - - -}	{NA}	{XM_004964979.3; PREDICTED: Setaria italica transcription factor TCP15-like (LOC101758915), mRNA}	TCP15	{XP_004965036.1; PREDICTED: transcription factor TCP15-like [Setaria italica]}
i1_LQ_LWC_c36383/f1p2/1900	12.38	11.3867	11.2967	11.9733	7.51667	12.86	-0.0481865	-0.599181	0.186994	{sp|Q52MZ2|TGA10_TOBAC; bZIP transcription factor TGA10 OS=Nicotiana tabacum GN=TGA10 PE=1 SV=1}	{sita:101763586; K14431 TGA transcription factor TGA - ko04075; Environmental Information Processing; Signal transduction; Plant hormone signal transduction}	{NA}	{XM_014804640.1; PREDICTED: Setaria italica transcription factor TGA2-like (LOC101763586), mRNA}	TGA2	{XP_014660126.1; PREDICTED: transcription factor TGA2-like [Setaria italica]}
i4_LQ_LWC_c23933/f1p0/4691	1.77	2.04333	1.92667	1.78	1.31667	1.95667	0.00812788	-0.634034	0.022291	{NA}	{sita:101761136; - - - - -}	{NA}	{XM_004953314.2; PREDICTED: Setaria italica transcription factor TGA2 (LOC101761136), transcript variant X1, mRNA}	TGA2	{XP_004953371.1; PREDICTED: transcription factor TGA2 [Setaria italica]}
i1_HQ_LWC_c11086/f2p0/1795	54.5233	53.76	30.3433	35.0767	29.08	34.6733	-0.636362	-0.886506	0.192447	{sp|A0A0P0WFC8|TGAL6_ORYSJ; Transcription factor TGAL6 OS=Oryza sativa subsp. japonica GN=TGAL6 PE=2 SV=1}	{mus:103973934; K14431 TGA transcription factor TGA - ko04075; Environmental Information Processing; Signal transduction; Plant hormone signal transduction}	{NA}	{XM_004976917.3; PREDICTED: Setaria italica transcription factor TGA4-like (LOC101781674), transcript variant X1, mRNA}	TGA4	{XP_004976974.1; PREDICTED: transcription factor TGA4-like isoform X1 [Setaria italica]}
i1_LQ_LWC_c32624/f1p3/1793	3.87333	6.15	9.85667	4.18333	4.40667	4.29667	0.111077	-0.480899	-1.19788	{sp|Q6ZDF3|TRAB1_ORYSJ; bZIP transcription factor TRAB1 OS=Oryza sativa subsp. japonica GN=TRAB1 PE=1 SV=1}	{sita:101758999; K14432 ABF ABA responsive element binding factor - ko04075; Environmental Information Processing; Signal transduction; Plant hormone signal transduction}	{NA}	{XM_004956953.1; PREDICTED: Setaria italica bZIP transcription factor TRAB1-like (LOC101758999), mRNA}	TRAB1	{XP_004957010.1; PREDICTED: bZIP transcription factor TRAB1-like [Setaria italica]}
i1_LQ_LWC_c17064/f1p0/1537	8.81333	11.5833	11.2167	11.7967	7.04	12.27	0.42062	-0.718403	0.129491	{sp|Q9LJG8|ASIL2_ARATH; Trihelix transcription factor ASIL2 OS=Arabidopsis thaliana GN=ASIL2 PE=2 SV=1}	{dosa:Os02t0565000-01; - - - - -}	{At3g58630; KOG4282 Transcription factor GT-2 and related proteins, contains trihelix DNA-binding/SANT domain K Transcription ;}	{XM_004975687.3; PREDICTED: Setaria italica trihelix transcription factor ASIL2-like (LOC101768858), mRNA}	triheix TF	{XP_004975744.1; PREDICTED: trihelix transcription factor ASIL2-like [Setaria italica]}
i2_LQ_LWC_c48039/f1p0/2209	60.2333	40.44	44.2567	67.8233	29.8267	31.3633	0.17122	-0.43918	-0.496816	{sp|P0CG86|RS271_HORVU; Ubiquitin-40S ribosomal protein S27a OS=Hordeum vulgare GN=MUB1 PE=3 SV=1}	{zma:103651369; - - - - -}	{At5g05550; KOG4282 Transcription factor GT-2 and related proteins, contains trihelix DNA-binding/SANT domain K Transcription ;}	{XM_004969453.3; PREDICTED: Setaria italica trihelix transcription factor ASIL2-like (LOC101767341), mRNA}	triheix TF	{XP_004969510.1; PREDICTED: trihelix transcription factor ASIL2-like [Setaria italica]}
i1_LQ_LWC_c2918/f3p0/1687	36.23	31.09	24.5867	37.0667	20.3667	26.71	0.0329376	-0.610241	0.119504	{sp|Q9LJG8|ASIL2_ARATH; Trihelix transcription factor ASIL2 OS=Arabidopsis thaliana GN=ASIL2 PE=2 SV=1}	{sita:101782730; - - - - -}	{At3g14180; KOG4282 Transcription factor GT-2 and related proteins, contains trihelix DNA-binding/SANT domain K Transcription ;}	{XM_004952674.1; PREDICTED: Setaria italica trihelix transcription factor ASIL2-like (LOC101782730), mRNA}	trihelix TF	{XP_004952731.1; PREDICTED: trihelix transcription factor ASIL2-like [Setaria italica]}
i4_LQ_LWC_c8187/f1p3/4803	3.59333	3.29333	3.46667	3.1	2.56333	3.75667	-0.213055	-0.361527	0.115904	{sp|Q9SYG2|ASIL1_ARATH; Trihelix transcription factor ASIL1 OS=Arabidopsis thaliana GN=ASIL1 PE=1 SV=1}	{osa:4324693; - - - - -}	{At1g54060; KOG4282 Transcription factor GT-2 and related proteins, contains trihelix DNA-binding/SANT domain K Transcription ;}	{XM_004969708.1; PREDICTED: Setaria italica trihelix transcription factor ASIL1 (LOC101766391), mRNA}	trihelix TF	{XP_004969765.1; PREDICTED: trihelix transcription factor ASIL1 [Setaria italica]}
i1_LQ_LWC_c30973/f1p0/1663	33.2567	39.24	37.62	27.4867	22.76	42.7533	-0.274912	-0.785824	0.184537	{sp|O22768|UNE12_ARATH; Transcription factor UNE12 OS=Arabidopsis thaliana GN=UNE12 PE=2 SV=2}	{bdi:100831162; - - - - -}	{NA}	{XM_004981368.2; PREDICTED: Setaria italica transcription factor UNE12-like (LOC101766345), mRNA}	UNE12	{XP_004981425.1; PREDICTED: transcription factor UNE12-like [Setaria italica]}
i3_LQ_LWC_c20861/f1p21/3109	0.776667	0.843333	0.803333	0.553333	0.82	1.48333	-0.489147	-0.0404791	0.884772	{sp|Q9MA75|VIP1_ARATH; Transcription factor VIP1 OS=Arabidopsis thaliana GN=VIP1 PE=1 SV=1}	{pda:103703162; K20557 VIP1 transcription factor VIP1 - ko04016; Environmental Information Processing; Signal transduction; MAPK signaling pathway - plant}	{NA}	{XM_004977263.3; PREDICTED: Setaria italica transcription factor VIP1-like (LOC101780472), mRNA}	VIP1	{OEL31972.1; Transcription factor VIP1 [Dichanthelium oligosanthes]}
i0_LQ_LWC_c373/f1p0/966	13.2733	22.4467	31.5467	14.5433	13.78	22.6367	0.131827	-0.703925	-0.478826	{sp|Q9MA75|VIP1_ARATH; Transcription factor VIP1 OS=Arabidopsis thaliana GN=VIP1 PE=1 SV=1}	{pda:103703162; K20557 VIP1 transcription factor VIP1 - ko04016; Environmental Information Processing; Signal transduction; MAPK signaling pathway - plant}	{NA}	{XM_004978695.3; PREDICTED: Setaria italica transcription factor VIP1-like (LOC101777244), mRNA}	VIP1-like	{XP_004978752.1; PREDICTED: transcription factor VIP1-like [Setaria italica]}
i2_HQ_LWC_c12823/f2p0/2735	0.08	0.18	0.183333	0.08	0.06	0.186667	0	-1.58496	0.0259952	{sp|Q9SVB7|WRK13_ARATH; Probable WRKY transcription factor 13 OS=Arabidopsis thaliana GN=WRKY13 PE=2 SV=1}	{lang:109359100; - - - - -}	{NA}	{XM_004968384.1; PREDICTED: Setaria italica probable WRKY transcription factor 12 (LOC101767737), mRNA}	WRKY12	{XP_004968441.1; PREDICTED: probable WRKY transcription factor 12 [Setaria italica]}
i2_LQ_LWC_c68862/f1p0/2465	0.0433333	0.06	0	0	0.02	0	0	-1.58496	0	{sp|Q9FG77|WRKY2_ARATH; Probable WRKY transcription factor 2 OS=Arabidopsis thaliana GN=WRKY2 PE=1 SV=1}	{egu:105038993; K18835 WRKY2 WRKY transcription factor 2 - ko04626; Organismal Systems; Environmental adaptation; Plant-pathogen interaction}	{NA}	{XM_012846644.2; PREDICTED: Setaria italica probable WRKY transcription factor 2 (LOC101756130), mRNA}	WRKY2	{XP_012702098.2; PREDICTED: LOW QUALITY PROTEIN: probable WRKY transcription factor 2 [Setaria italica]}
i1_LQ_LWC_c21190/f1p0/1893	3.18333	4.00667	6.17333	2.38667	2.62667	3.50333	-0.415541	-0.609169	-0.817321	{sp|Q6B6R4|WRK24_ORYSI; WRKY transcription factor WRKY24 OS=Oryza sativa subsp. indica GN=WRKY24 PE=2 SV=1}	{sita:101782795; K13424 WRKY33 WRKY transcription factor 33 - ko04016; Environmental Information Processing; Signal transduction; MAPK signaling pathway - plant | ko04626; Organismal Systems; Environmental adaptation; Plant-pathogen interaction}	{NA}	{XM_004961706.3; PREDICTED: Setaria italica probable WRKY transcription factor 25 (LOC101782795), mRNA}	WRKY25	{XP_004961763.1; PREDICTED: probable WRKY transcription factor 25 [Setaria italica]}
i0_LQ_LWC_c803/f1p0/877	17.9033	6.45667	4.12333	14.6733	8.79333	6.56333	-0.287032	0.445621	0.670618	{sp|Q9FLX8|WRK27_ARATH; Probable WRKY transcription factor 27 OS=Arabidopsis thaliana GN=WRKY27 PE=2 SV=1}	{sita:101752465; - - - - -}	{NA}	{XM_004951190.2; PREDICTED: Setaria italica probable WRKY transcription factor 27 (LOC101752465), mRNA}	WRKY27	{XP_004951247.1; PREDICTED: probable WRKY transcription factor 27 [Setaria italica]}
i2_HQ_LWC_c5316/f3p1/2478	2.03	1.08333	1.87	0.496667	1.25333	1.36667	-2.03113	0.210293	-0.452377	{sp|Q9FG77|WRKY2_ARATH; Probable WRKY transcription factor 2 OS=Arabidopsis thaliana GN=WRKY2 PE=1 SV=1}	{sbi:SORBI_06g019710; K18835 WRKY2 WRKY transcription factor 2 - ko04626; Organismal Systems; Environmental adaptation; Plant-pathogen interaction}	{NA}	{XM_012847254.1; PREDICTED: Setaria italica probable WRKY transcription factor 34 (LOC101773177), transcript variant X2, mRNA}	WRKY34	{XP_004975929.1; PREDICTED: probable WRKY transcription factor 34 [Setaria italica]}
i2_LQ_LWC_c85901/f1p0/2168	11.53	5.20333	29.2567	16.3467	8.10667	4.00333	0.503604	0.639673	-2.86949	{sp|Q9SUP6|WRK53_ARATH; Probable WRKY transcription factor 53 OS=Arabidopsis thaliana GN=WRKY53 PE=1 SV=1}	{sita:101785214; - - - - -}	{NA}	{XM_004961104.2; PREDICTED: Setaria italica probable WRKY transcription factor 53 (LOC101785214), transcript variant X2, mRNA}	WRKY53	{XP_004961161.1; PREDICTED: probable WRKY transcription factor 53 isoform X2 [Setaria italica]}
i2_LQ_LWC_c35040/f1p0/2510	2.98333	1.8	2.62333	2.74667	1.43	2.15333	-0.119243	-0.331982	-0.284829	{sp|Q9C983|WRK57_ARATH; Probable WRKY transcription factor 57 OS=Arabidopsis thaliana GN=WRKY57 PE=2 SV=1}	{obr:102719478; - - - - -}	{NA}	{XM_004981648.1; PREDICTED: Setaria italica probable WRKY transcription factor 57 (LOC101773634), mRNA}	WRKY57	{XP_004981705.1; PREDICTED: probable WRKY transcription factor 57 [Setaria italica]}
i1_LQ_LWC_c21040/f1p2/1452	9.47	5.61667	16.8833	13.3933	4.83667	9.27	0.500079	-0.215701	-0.864959	{sp|Q0DAJ3|WRK28_ORYSJ; WRKY transcription factor WRKY28 OS=Oryza sativa subsp. japonica GN=WRKY28 PE=2 SV=2}	{sbi:SORBI_10g025600; - - - - -}	{NA}	{XM_004965669.2; PREDICTED: Setaria italica probable WRKY transcription factor 60 (LOC101781477), mRNA}	WRKY60	{XP_004965726.1; PREDICTED: probable WRKY transcription factor 60 [Setaria italica]}
i2_LQ_LWC_c41563/f1p0/2028	8.11667	13.33	10.7667	6.84667	8.86	12.3533	-0.245486	-0.589298	0.198329	{sp|Q9C9F0|WRKY9_ARATH; Probable WRKY transcription factor 9 OS=Arabidopsis thaliana GN=WRKY9 PE=2 SV=1}	{sita:101777359; - - - - -}	{NA}	{XM_012845679.1; PREDICTED: Setaria italica probable WRKY transcription factor 61 (LOC101777359), mRNA}	WRKY61	{XP_012701133.1; PREDICTED: LOW QUALITY PROTEIN: probable WRKY transcription factor 61 [Setaria italica]}
i1_LQ_LWC_c36450/f1p2/1858	38.96	9.28667	6.00667	32.4367	8.99333	8.3	-0.264368	-0.0463049	0.466547	{sp|O64747|WRK35_ARATH; Probable WRKY transcription factor 35 OS=Arabidopsis thaliana GN=WRKY35 PE=2 SV=1}	{zma:103651472; K13425 WRKY22 WRKY transcription factor 22 - ko04016; Environmental Information Processing; Signal transduction; MAPK signaling pathway - plant | ko04626; Organismal Systems; Environmental adaptation; Plant-pathogen interaction}	{NA}	{XM_004969162.2; PREDICTED: Setaria italica probable WRKY transcription factor 65 (LOC101753693), mRNA}	WRKY65	{XP_004969219.1; PREDICTED: probable WRKY transcription factor 65 [Setaria italica]}
i2_LQ_LWC_c8508/f1p0/2662	119.56	77.1367	57.45	99.1033	45.11	70.0133	-0.270729	-0.77397	0.285323	{sp|Q9LP56|WRK65_ARATH; Probable WRKY transcription factor 65 OS=Arabidopsis thaliana GN=WRKY65 PE=2 SV=1}	{zma:100501507; - - - - -}	{NA}	{XM_004969899.3; PREDICTED: Setaria italica probable WRKY transcription factor 65 (LOC101774212), mRNA}	WRKY65	{XP_004969956.1; PREDICTED: probable WRKY transcription factor 65 [Setaria italica]}
i1_LQ_LWC_c34927/f1p0/1483	65.66	64.9833	94.53	72.65	67.5	83.3467	0.145948	0.0548178	-0.181648	{sp|Q9SUP6|WRK53_ARATH; Probable WRKY transcription factor 53 OS=Arabidopsis thaliana GN=WRKY53 PE=1 SV=1}	{sita:101762911; - - - - -}	{NA}	{XM_004956556.3; PREDICTED: Setaria italica probable WRKY transcription factor 70 (LOC101762911), mRNA}	WRKY70	{XP_004956613.1; PREDICTED: probable WRKY transcription factor 70 [Setaria italica]}
i1_LQ_LWC_c11635/f1p0/1937	64.0767	61.74	45.9533	69.1667	56.21	57.66	0.110278	-0.135379	0.327401	{sp|Q8VWV6|WRK61_ARATH; Probable WRKY transcription factor 61 OS=Arabidopsis thaliana GN=WRKY61 PE=2 SV=1}	{zma:103649651; - - - - -}	{NA}	{XM_004968428.2; PREDICTED: Setaria italica probable WRKY transcription factor 72 (LOC101785397), mRNA}	WRKY72	{XP_004968485.1; PREDICTED: probable WRKY transcription factor 72 [Setaria italica]}
i2_LQ_LWC_c71825/f1p0/2205	11.21	14.1967	8.16	8.09	7.46333	12.19	-0.470575	-0.92766	0.579057	{NA}	{pda:103705538; - - - - -}	{NA}	{XM_004964484.2; PREDICTED: Setaria italica probable WRKY transcription factor 72 (LOC101766218), mRNA}	WRKY72	{XP_004964541.1; PREDICTED: probable WRKY transcription factor 72 [Setaria italica]}
i1_LQ_LWC_c7112/f1p0/1655	10.3333	7.86	10.1567	10.1767	5.40333	8.49	-0.0220406	-0.54068	-0.258591	{sp|Q9FYA2|WRK75_ARATH; Probable WRKY transcription factor 75 OS=Arabidopsis thaliana GN=WRKY75 PE=2 SV=1}	{zma:103648003; - - - - -}	{NA}	{XM_004979239.2; PREDICTED: Setaria italica probable WRKY transcription factor 75 (LOC101786418), mRNA}	WRKY75	{XP_004979296.1; PREDICTED: probable WRKY transcription factor 75 [Setaria italica]}
