# Supplementary material for: Genome-Wide Expression and Physiological Profiling of Pearl Millet Genotype Reveal the Biological Pathways and Various Gene Clusters Underlying Salt Resistance
Source: Front Plant Sci. 2022 Mar 28;13:849618. doi: 10.3389/fpls.2022.849618 (PMC8996197; doi:10.3389/fpls.2022.849618)
Supplement: Supplementary file 10 [file Table_10.XLSX]

## Sheet: 1hr
BinCode	BinName	transcript_ids	type	description	input_1hr.txt
27.3	RNA.regulation of transcription	i2_LQ_LWC_c103936/f1p0/2843	Transcript	moderately similar to ( 203) AT1G62910 | Symbols: | pentatricopeptide (PPR) repeat-containing protein | chr1:23299060-23303162 FORWARDhighly similar to ( 516) RF1_ORYSA Rf1 protein, mitochondrial precursor (PPR protein) (Fertility restorer) (Restorer for CMS) - Oryza sativa (Rice) protein|pentatricopeptide repeat domain containing protein, putative, expressed	7.83404	TFS
27.3	RNA.regulation of transcription	i0_LQ_LWC_c2050/f1p0/746	Transcript	highly similar to ( 548) AT3G04740 | Symbols: SWP, MED14, ATMED14 | SWP (STRUWWELPETER) | chr3:1294037-1300555 FORWARD MED14 protein|SWP, putative, expressed	-10.1319
27.3	RNA.regulation of transcription	i1_LQ_LWC_c3926/f1p13/1967	Transcript	moderately similar to ( 477) AT3G48250 | Symbols: | pentatricopeptide (PPR) repeat-containing protein | chr3:17870064-17871929 REVERSEvery weakly similar to (93.2) RF1_ORYSA Rf1 protein, mitochondrial precursor (PPR protein) (Fertility restorer) (Restorer for CMS) - Oryza sativa (Rice) protein|PPR repeat containing protein, expressed	3.21642
27.3	RNA.regulation of transcription	i2_HQ_LWC_c32274/f2p0/2808	Transcript	moderately similar to ( 397) AT1G10270 | Symbols: GRP23 | GRP23 (GLUTAMINE-RICH PROTEIN23); binding | chr1:3363535-3366276 FORWARDweakly similar to ( 129) RF1_ORYSA Rf1 protein, mitochondrial precursor (PPR protein) (Fertility restorer) (Restorer for CMS) - Oryza sativa (Rice) protein|PPR repeat domain containing protein, putative, expressed	11.3054
27.3	RNA.regulation of transcription	i2_LQ_LWC_c103363/f1p0/2962	Transcript	highly similar to ( 504) AT2G02150 | Symbols: | pentatricopeptide (PPR) repeat-containing protein | chr2:547389-552229 REVERSEmoderately similar to ( 263) RF1_ORYSA Rf1 protein, mitochondrial precursor (PPR protein) (Fertility restorer) (Restorer for CMS) - Oryza sativa (Rice) protein|pentatricopeptide, putative, expressed	-3.37093
27.3	RNA.regulation of transcription	i5_LQ_LWC_c10445/f1p0/5092	Transcript	moderately similar to ( 333) AT1G62670 | Symbols: | pentatricopeptide (PPR) repeat-containing protein | chr1:23204773-23206665 REVERSEhighly similar to ( 910) RF1_ORYSA Rf1 protein, mitochondrial precursor (PPR protein) (Fertility restorer) (Restorer for CMS) - Oryza sativa (Rice) protein|Rf1, mitochondrial precursor, putative, expressed	8.85995
27.3	RNA.regulation of transcription	i2_LQ_LWC_c24489/f1p0/2962	Transcript	moderately similar to ( 456) AT3G54980 | Symbols: | pentatricopeptide (PPR) repeat-containing protein | chr3:20370293-20372848 FORWARDmoderately similar to ( 264) RF1_ORYSA Rf1 protein, mitochondrial precursor (PPR protein) (Fertility restorer) (Restorer for CMS) - Oryza sativa (Rice) protein|pentatricopeptide containing protein, putative, expressed	0
27.3	RNA.regulation of transcription	i1_LQ_LWC_c4950/f1p0/1556	Transcript	moderately similar to ( 317) AT1G61870 | Symbols: PPR336 | PPR336 (pentatricopeptide repeat 336) | chr1:22865326-22866552 REVERSEweakly similar to ( 103) RF1_ORYSA Rf1 protein, mitochondrial precursor (PPR protein) (Fertility restorer) (Restorer for CMS) - Oryza sativa (Rice) protein|membrane-associated salt-inducible protein, putative, expressed	3.54785
27.3	RNA.regulation of transcription	i1_LQ_LWC_c3736/f1p0/1805	Transcript	moderately similar to ( 406) AT2G34640 | Symbols: PTAC12 | PTAC12 (PLASTID TRANSCRIPTIONALLY ACTIVE12) | chr2:14582061-14584345 REVERSE protein|PTAC12, putative, expressed	7.53122
27.3	RNA.regulation of transcription	i2_LQ_LWC_c106123/f1p1/2713	Transcript	highly similar to ( 590) AT5G02830 | Symbols: | pentatricopeptide (PPR) repeat-containing protein | chr5:644458-648421 REVERSEweakly similar to ( 105) RF1_ORYSA Rf1 protein, mitochondrial precursor (PPR protein) (Fertility restorer) (Restorer for CMS) - Oryza sativa (Rice) protein|PPR repeat domain containing protein, putative, expressed	7.47537
27.3	RNA.regulation of transcription	i2_LQ_LWC_c58856/f1p0/2033	Transcript	moderately similar to ( 315) AT5G40400 | Symbols: | FUNCTIONS IN: molecular_function unknown; INVOLVED IN: biological_process unknown; LOCATED IN: cellular_component unknown; CONTAINS InterPro DOMAIN/s: Pentatricopeptide repeat (InterPro:IPR002885); BEST Arabidopsis thaliana protein match is: pentatricopeptide (PPR) repeat-containing protein (TAIR:AT5G55840.1); Has 18933 Blast hits to 5737 protei…	7.68279
27.3	RNA.regulation of transcription	i2_LQ_LWC_c109308/f1p0/2510	Transcript	moderately similar to ( 330) AT1G09900 | Symbols: | pentatricopeptide (PPR) repeat-containing protein | chr1:3218133-3219929 FORWARDmoderately similar to ( 263) RF1_ORYSA Rf1 protein, mitochondrial precursor (PPR protein) (Fertility restorer) (Restorer for CMS) - Oryza sativa (Rice) protein|PPR repeat domain containing protein, putative, expressed	6.07003
27.3	RNA.regulation of transcription	i2_HQ_LWC_c10219/f3p0/2664	Transcript	highly similar to ( 592) AT2G37230 | Symbols: | pentatricopeptide (PPR) repeat-containing protein | chr2:15637177-15639450 REVERSEweakly similar to ( 167) RF1_ORYSA Rf1 protein, mitochondrial precursor (PPR protein) (Fertility restorer) (Restorer for CMS) - Oryza sativa (Rice) protein|pentatricopeptide, putative, expressed	10.1606
27.3	RNA.regulation of transcription	i2_LQ_LWC_c37627/f1p0/2820	Transcript	moderately similar to ( 462) AT3G18020 | Symbols: | pentatricopeptide (PPR) repeat-containing protein | chr3:6165449-6167515 FORWARDweakly similar to ( 161) RF1_ORYSA Rf1 protein, mitochondrial precursor (PPR protein) (Fertility restorer) (Restorer for CMS) - Oryza sativa (Rice) protein|PPR repeat domain containing protein, putative, expressed	7.63192
27.3	RNA.regulation of transcription	i2_HQ_LWC_c12397/f8p0/2507	Transcript	moderately similar to ( 405) AT1G79730 | Symbols: ELF7 | ELF7 (EARLY FLOWERING 7) | chr1:30000743-30003969 REVERSE Paf1 protein|ELF7, putative, expressed	10.3342
27.3	RNA.regulation of transcription	i1_LQ_LWC_c34326/f1p0/1951	Transcript	moderately similar to ( 295) AT1G62910 | Symbols: | pentatricopeptide (PPR) repeat-containing protein | chr1:23299060-23303162 FORWARDhighly similar to ( 634) RF1_ORYSA Rf1 protein, mitochondrial precursor (PPR protein) (Fertility restorer) (Restorer for CMS) - Oryza sativa (Rice) protein|Rf1, mitochondrial precursor, putative, expressed	6.22225
27.3	RNA.regulation of transcription	i3_LQ_LWC_c5121/f1p0/3138	Transcript	moderately similar to ( 286) AT1G62910 | Symbols: | pentatricopeptide (PPR) repeat-containing protein | chr1:23299060-23303162 FORWARDhighly similar to ( 786) RF1_ORYSA Rf1 protein, mitochondrial precursor (PPR protein) (Fertility restorer) (Restorer for CMS) - Oryza sativa (Rice) protein|Rf1, mitochondrial precursor, putative, expressed	9.13736
27.3	RNA.regulation of transcription	i3_LQ_LWC_c37666/f1p1/3717	Transcript	moderately similar to ( 347) AT5G61400 | Symbols: | pentatricopeptide (PPR) repeat-containing protein | chr5:24681550-24683514 FORWARDmoderately similar to ( 218) RF1_ORYSA Rf1 protein, mitochondrial precursor (PPR protein) (Fertility restorer) (Restorer for CMS) - Oryza sativa (Rice) protein|PPR repeat domain containing protein, putative, expressed	-0.969243
27.3	RNA.regulation of transcription	i2_LQ_LWC_c89652/f1p0/2287	Transcript	moderately similar to ( 259) AT1G66345 | Symbols: | pentatricopeptide (PPR) repeat-containing protein | chr1:24737719-24739353 FORWARDweakly similar to ( 113) RF1_ORYSA Rf1 protein, mitochondrial precursor (PPR protein) (Fertility restorer) (Restorer for CMS) - Oryza sativa (Rice) protein|PPR repeat domain containing protein, putative, expressed	6.39709
27.3	RNA.regulation of transcription	i2_LQ_LWC_c32225/f1p0/2632	Transcript	highly similar to ( 560) AT4G01570 | Symbols: | pentatricopeptide (PPR) repeat-containing protein | chr4:679487-681904 FORWARDweakly similar to ( 154) RF1_ORYSA Rf1 protein, mitochondrial precursor (PPR protein) (Fertility restorer) (Restorer for CMS) - Oryza sativa (Rice) protein|PPR repeat domain containing protein, putative, expressed	4.88703
27.3	RNA.regulation of transcription	i1_LQ_LWC_c10574/f1p6/1838	Transcript	moderately similar to ( 370) AT5G60960 | Symbols: | pentatricopeptide (PPR) repeat-containing protein | chr5:24528423-24529988 REVERSEvery weakly similar to (92.0) RF1_ORYSA Rf1 protein, mitochondrial precursor (PPR protein) (Fertility restorer) (Restorer for CMS) - Oryza sativa (Rice) protein|PPR repeat domain containing protein, putative, expressed	10.2077
27.3	RNA.regulation of transcription	i1_LQ_LWC_c10535/f1p1/1622	Transcript	moderately similar to ( 243) AT3G25210 | Symbols: | FUNCTIONS IN: molecular_function unknown; INVOLVED IN: biological_process unknown; LOCATED IN: chloroplast; EXPRESSED IN: 19 plant structures; EXPRESSED DURING: 13 growth stages; CONTAINS InterPro DOMAIN/s: Pentatricopeptide repeat (InterPro:IPR002885); BEST Arabidopsis thaliana protein match is: unknown protein (TAIR:AT2G27800.1); Has 13348 Bla…	7.67722
27.3	RNA.regulation of transcription	i1_LQ_LWC_c24980/f1p0/1920	Transcript	moderately similar to ( 432) AT5G18390 | Symbols: | pentatricopeptide (PPR) repeat-containing protein | chr5:6090954-6092333 FORWARDweakly similar to ( 142) RF1_ORYSA Rf1 protein, mitochondrial precursor (PPR protein) (Fertility restorer) (Restorer for CMS) - Oryza sativa (Rice) protein|pentatricopeptide, putative, expressed	-1.55965
27.3	RNA.regulation of transcription	i2_LQ_LWC_c30982/f5p5/2802	Transcript	moderately similar to ( 368) AT1G62670 | Symbols: | pentatricopeptide (PPR) repeat-containing protein | chr1:23204773-23206665 REVERSEnearly identical (1301) RF1_ORYSA Rf1 protein, mitochondrial precursor (PPR protein) (Fertility restorer) (Restorer for CMS) - Oryza sativa (Rice) protein|Rf1, mitochondrial precursor, putative, expressed	9.55483
27.3	RNA.regulation of transcription	i5_LQ_LWC_c7220/f1p0/5375	Transcript	highly similar to ( 546) AT5G15280 | Symbols: | pentatricopeptide (PPR) repeat-containing protein | chr5:4962293-4965976 FORWARDweakly similar to ( 135) RF1_ORYSA Rf1 protein, mitochondrial precursor (PPR protein) (Fertility restorer) (Restorer for CMS) - Oryza sativa (Rice) protein|PPR repeat domain containing protein, putative, expressed	6.75683
27.3	RNA.regulation of transcription	i1_LQ_LWC_c23030/f1p1/1810	Transcript	moderately similar to ( 416) AT1G80150 | Symbols: | pentatricopeptide (PPR) repeat-containing protein | chr1:30148738-30149931 FORWARDweakly similar to ( 109) RF1_ORYSA Rf1 protein, mitochondrial precursor (PPR protein) (Fertility restorer) (Restorer for CMS) - Oryza sativa (Rice) protein|pentatricopeptide, putative, expressed	9.19601
27.3	RNA.regulation of transcription	i2_LQ_LWC_c103887/f1p0/2923	Transcript	moderately similar to ( 476) AT4G19440 | Symbols: | pentatricopeptide (PPR) repeat-containing protein | chr4:10602006-10604483 REVERSEmoderately similar to ( 264) RF1_ORYSA Rf1 protein, mitochondrial precursor (PPR protein) (Fertility restorer) (Restorer for CMS) - Oryza sativa (Rice) protein|pentatricopeptide repeat domain containing protein, putative, expressed	-7.85541
27.3	RNA.regulation of transcription	i1_LQ_LWC_c23708/f1p0/1765	Transcript	highly similar to ( 644) AT3G46610 | Symbols: | pentatricopeptide (PPR) repeat-containing protein | chr3:17160224-17162221 REVERSEweakly similar to ( 137) RF1_ORYSA Rf1 protein, mitochondrial precursor (PPR protein) (Fertility restorer) (Restorer for CMS) - Oryza sativa (Rice) protein|pentatricopeptide, putative, expressed	-2.18052
27.3	RNA.regulation of transcription	i3_LQ_LWC_c4444/f1p0/4030	Transcript	weakly similar to ( 172) AT5G64320 | Symbols: | pentatricopeptide (PPR) repeat-containing protein | chr5:25723247-25725439 REVERSEweakly similar to ( 141) RF1_ORYSA Rf1 protein, mitochondrial precursor (PPR protein) (Fertility restorer) (Restorer for CMS) - Oryza sativa (Rice) protein|PPR repeat domain containing protein, putative, expressed	7.32418
27.3	RNA.regulation of transcription	i2_LQ_LWC_c35875/f1p0/2720	Transcript	moderately similar to ( 273) AT5G42520 | Symbols: BPC6, BBR/BPC6, ATBPC6 | ATBPC6; DNA binding / transcription factor | chr5:17001618-17002466 FORWARDDUF1004 protein|GAGA-binding protein, putative, expressed	3.48716
27.3.1	RNA.regulation of transcription.ABI3/VP1-related B3-domain-containing transcription factor family	i1_LQ_LWC_c6374/f1p0/1835	Transcript	weakly similar to ( 194) AT2G46870 | Symbols: NGA1 | NGA1 (NGATHA1); transcription factor | chr2:19261313-19262245 FORWARDB3 protein|B3 DNA binding domain containing protein, expressed	0
27.3.1	RNA.regulation of transcription.ABI3/VP1-related B3-domain-containing transcription factor family	i1_LQ_LWC_c18965/f1p0/1793	Transcript	moderately similar to ( 216) AT2G46870 | Symbols: NGA1 | NGA1 (NGATHA1); transcription factor | chr2:19261313-19262245 FORWARDB3 protein|B3 DNA binding domain containing protein, expressed	-7.49422
27.3.2	RNA.regulation of transcription.Alfin-like	i1_LQ_LWC_c25837/f1p0/1133	Transcript	moderately similar to ( 303) AT5G20510 | Symbols: AL5 | AL5 (ALFIN-LIKE 5); DNA binding / methylated histone residue binding | chr5:6939991-6942846 REVERSE protein|PHD finger protein, putative, expressed	7.83156
27.3.2	RNA.regulation of transcription.Alfin-like	i2_LQ_LWC_c101396/f1p1/2813	Transcript	weakly similar to ( 108) AT2G02470 | Symbols: AL6 | AL6 (ALFIN-LIKE 6); DNA binding / methylated histone residue binding | chr2:652837-654621 FORWARD protein|PHD finger protein, putative, expressed	-4.77379
27.3.2	RNA.regulation of transcription.Alfin-like	i3_HQ_LWC_c33886/f2p0/3668	Transcript	moderately similar to ( 208) AT5G20510 | Symbols: AL5 | AL5 (ALFIN-LIKE 5); DNA binding / methylated histone residue binding | chr5:6939991-6942846 REVERSE protein|PHD finger protein, putative, expressed	9.62074
27.3.2	RNA.regulation of transcription.Alfin-like	i1_LQ_LWC_c27406/f1p0/1285	Transcript	moderately similar to ( 295) AT5G05610 | Symbols: AL1 | AL1 (ALFIN-LIKE 1); DNA binding / methylated histone residue binding | chr5:1677331-1678942 REVERSE protein|PHD finger protein, putative, expressed	11.3551
27.3.2	RNA.regulation of transcription.Alfin-like	i1_LQ_LWC_c14275/f1p0/1229	Transcript	moderately similar to ( 280) AT5G20510 | Symbols: AL5 | AL5 (ALFIN-LIKE 5); DNA binding / methylated histone residue binding | chr5:6939991-6942846 REVERSE protein|PHD finger protein, putative, expressed	4.37151
27.3.2	RNA.regulation of transcription.Alfin-like	i3_LQ_LWC_c19058/f1p0/3118	Transcript	moderately similar to ( 266) AT3G11200 | Symbols: AL2 | AL2 (ALFIN-LIKE 2); DNA binding / methylated histone residue binding | chr3:3508387-3510195 REVERSE protein|PHD finger protein, putative, expressed	9.89162
27.3.3	RNA.regulation of transcription.AP2/EREBP, APETALA2/Ethylene-responsive element binding protein family	i2_LQ_LWC_c107090/f1p1/2114	Transcript	weakly similar to ( 109) AT1G78080 | Symbols: RAP2.4 | RAP2.4 (related to AP2 4); DNA binding / transcription factor | chr1:29364790-29365794 FORWARDAP2 AP2 protein|ethylene-responsive transcription factor, putative, expressed	8.54243
27.3.3	RNA.regulation of transcription.AP2/EREBP, APETALA2/Ethylene-responsive element binding protein family	i1_LQ_LWC_c42634/f1p0/1045	Transcript	weakly similar to ( 120) AT4G25480 | Symbols: DREB1A, CBF3, ATCBF3 | DREB1A (DEHYDRATION RESPONSE ELEMENT B1A); DNA binding / transcription activator/ transcription factor | chr4:13018353-13019003 REVERSEAP2 AP2 protein|dehydration-responsive element-binding protein, putative, expressed	-5.57301
27.3.3	RNA.regulation of transcription.AP2/EREBP, APETALA2/Ethylene-responsive element binding protein family	i1_LQ_LWC_c19082/f1p2/1882	Transcript	moderately similar to ( 258) AT4G36920 | Symbols: AP2, FLO2, FL1 | AP2 (APETALA 2); transcription factor | chr4:17400998-17403140 FORWARDweakly similar to ( 145) BBM2_BRANA Protein BABY BOOM 2 (BnBBM2) - Brassica napus (Rape)AP2 AP2 protein|AP2 domain containing protein, expressed	0.762474
27.3.3	RNA.regulation of transcription.AP2/EREBP, APETALA2/Ethylene-responsive element binding protein family	i3_LQ_LWC_c21203/f1p7/3600	Transcript	moderately similar to ( 226) AT3G54320 | Symbols: WRI1, WRI, ASML1 | WRI1 (WRINKLED 1); DNA binding / transcription factor | chr3:20114809-20118473 FORWARDweakly similar to ( 199) BBM1_BRANA Protein BABY BOOM 1 (BnBBM1) - Brassica napus (Rape)AP2 AP2 protein|AP2 domain containing protein, expressed	9.2081
27.3.3	RNA.regulation of transcription.AP2/EREBP, APETALA2/Ethylene-responsive element binding protein family	i2_LQ_LWC_c85068/f1p0/2278	Transcript	moderately similar to ( 214) AT4G36920 | Symbols: AP2, FLO2, FL1 | AP2 (APETALA 2); transcription factor | chr4:17400998-17403140 FORWARDweakly similar to ( 123) BBM2_BRANA Protein BABY BOOM 2 (BnBBM2) - Brassica napus (Rape)AP2 AP2 protein|AP2 domain containing protein, expressed	-5.04389
27.3.3	RNA.regulation of transcription.AP2/EREBP, APETALA2/Ethylene-responsive element binding protein family	i1_HQ_LWC_c19889/f2p2/1859	Transcript	AP2 AP2 protein|AP2 domain containing protein, expressed	4.56222
27.3.3	RNA.regulation of transcription.AP2/EREBP, APETALA2/Ethylene-responsive element binding protein family	i1_LQ_LWC_c10760/f1p0/1932	Transcript	weakly similar to ( 117) AT4G39780 | Symbols: | AP2 domain-containing transcription factor, putative | chr4:18458216-18459034 REVERSEAP2 AP2 protein|ethylene-responsive transcription factor, putative, expressed	-5.20374
27.3.3	RNA.regulation of transcription.AP2/EREBP, APETALA2/Ethylene-responsive element binding protein family	i1_LQ_LWC_c39098/f1p0/1441	Transcript	weakly similar to ( 136) AT1G78080 | Symbols: RAP2.4 | RAP2.4 (related to AP2 4); DNA binding / transcription factor | chr1:29364790-29365794 FORWARDAP2 AP2 protein|ethylene-responsive transcription factor, putative, expressed	10.6314
27.3.3	RNA.regulation of transcription.AP2/EREBP, APETALA2/Ethylene-responsive element binding protein family	i1_HQ_LWC_c2213/f2p0/1493	Transcript	very weakly similar to ( 100) AT1G72360 | Symbols: | ethylene-responsive element-binding protein, putative | chr1:27241904-27242777 FORWARDweakly similar to ( 104) ERF1_ORYSA Ethylene-responsive transcription factor 1 (Ethylene-responsive element-binding factor 1) (EREBP-1) (OsEREBP1) - Oryza sativa (Rice)AP2 AP2 protein|AP2 domain containing protein, expressed	4.30422
27.3.3	RNA.regulation of transcription.AP2/EREBP, APETALA2/Ethylene-responsive element binding protein family	i2_LQ_LWC_c90423/f1p3/2817	Transcript	weakly similar to ( 182) AT1G15360 | Symbols: SHN1, WIN1 | SHN1 (SHINE 1); DNA binding / sequence-specific DNA binding / transcription factor | chr1:5283609-5284506 FORWARDAP2 AP2 protein|AP2 domain containing protein, expressed	-1.95005
27.3.3	RNA.regulation of transcription.AP2/EREBP, APETALA2/Ethylene-responsive element binding protein family	i1_LQ_LWC_c13219/f1p0/1441	Transcript	moderately similar to ( 234) AT1G25560 | Symbols: TEM1 | TEM1 (TEMPRANILLO 1); transcription factor | chr1:8981891-8982976 REVERSEB3 protein|B3 DNA binding domain containing protein, expressed	5.8628
27.3.3	RNA.regulation of transcription.AP2/EREBP, APETALA2/Ethylene-responsive element binding protein family	i1_LQ_LWC_c37745/f1p24/1102	Transcript	weakly similar to ( 110) AT5G11590 | Symbols: TINY2 | TINY2 (TINY2); DNA binding / transcription factor | chr5:3727789-3728499 REVERSEAP2 AP2 protein|AP2 domain containing protein, expressed	6.9605
27.3.3	RNA.regulation of transcription.AP2/EREBP, APETALA2/Ethylene-responsive element binding protein family	i2_LQ_LWC_c82810/f1p0/2345	Transcript	moderately similar to ( 256) AT4G36920 | Symbols: AP2, FLO2, FL1 | AP2 (APETALA 2); transcription factor | chr4:17400998-17403140 FORWARDweakly similar to ( 151) BBM1_BRANA Protein BABY BOOM 1 (BnBBM1) - Brassica napus (Rape)AP2 protein|AP2 domain containing protein, expressed	2.80174
27.3.4	RNA.regulation of transcription.ARF, Auxin Response Factor family	i2_LQ_LWC_c125769/f1p1/2056	Transcript	highly similar to ( 664) AT1G19220 | Symbols: ARF19, IAA22, ARF11 | ARF19 (AUXIN RESPONSE FACTOR 19); DNA binding / transcription factor | chr1:6628395-6632779 REVERSEAuxin_resp B3 protein|auxin response factor, putative, expressed	9.41709
27.3.4	RNA.regulation of transcription.ARF, Auxin Response Factor family	i1_LQ_LWC_c9153/f1p1/1854	Transcript	moderately similar to ( 480) AT2G33860 | Symbols: ETT, ARF3 | ETT (ETTIN); DNA binding / transcription factor | chr2:14325444-14328613 REVERSEAuxin_resp B3 protein|auxin response factor, putative, expressed	-6.01734
27.3.4	RNA.regulation of transcription.ARF, Auxin Response Factor family	i2_LQ_LWC_c11177/f1p7/2394	Transcript	highly similar to ( 729) AT1G30330 | Symbols: ARF6 | ARF6 (AUXIN RESPONSE FACTOR 6); transcription factor | chr1:10686125-10690036 REVERSEAuxin_resp B3 protein|auxin response factor 6, putative, expressed	0
27.3.4	RNA.regulation of transcription.ARF, Auxin Response Factor family	i1_LQ_LWC_c31360/f1p0/1674	Transcript	moderately similar to ( 408) AT2G33860 | Symbols: ETT, ARF3 | ETT (ETTIN); DNA binding / transcription factor | chr2:14325444-14328613 REVERSEAuxin_resp protein|auxin response factor 14, putative, expressed	6.67355
27.3.5	RNA.regulation of transcription.ARR	i2_HQ_LWC_c119277/f2p1/2323	Transcript	moderately similar to ( 325) AT2G25180 | Symbols: ARR12 | ARR12 (ARABIDOPSIS RESPONSE REGULATOR 12); transcription factor/ two-component response regulator | chr2:10724490-10726961 REVERSEvery weakly similar to (91.7) PRR73_ORYSA Two-component response regulator-like PRR73 (Pseudo-response regulator 73) (OsPRR73) - Oryza sativa (Rice)AtoC REC Response_reg REC OmpR CheY protein|two-component respo…	1.18647
27.3.5	RNA.regulation of transcription.ARR	i1_LQ_LWC_c33422/f1p2/1844	Transcript	weakly similar to ( 140) AT3G57040 | Symbols: ARR9, ATRR4 | ARR9 (RESPONSE REGULATOR 9); transcription regulator/ two-component response regulator | chr3:21110059-21111228 FORWARDREC Response_reg REC AtoC protein|OsRR6 type-A response regulator, expressed	9.48215
27.3.5	RNA.regulation of transcription.ARR	i2_LQ_LWC_c94161/f1p6/2047	Transcript	weakly similar to ( 137) AT1G59940 | Symbols: ARR3 | ARR3 (RESPONSE REGULATOR 3); transcription regulator/ two-component response regulator | chr1:22065894-22066895 REVERSEREC Response_reg COG3437 AtoC PleD CheY protein|OsRR3 type-A response regulator, expressed	9.39283
27.3.5	RNA.regulation of transcription.ARR	i1_LQ_LWC_c21913/f1p0/1455	Transcript	very weakly similar to ( 100) AT3G57040 | Symbols: ARR9, ATRR4 | ARR9 (RESPONSE REGULATOR 9); transcription regulator/ two-component response regulator | chr3:21110059-21111228 FORWARDREC REC protein|OsRR2 type-A response regulator, expressed	11.0056
27.3.5	RNA.regulation of transcription.ARR	i1_LQ_LWC_c19170/f1p0/1627	Transcript	moderately similar to ( 317) AT2G25180 | Symbols: ARR12 | ARR12 (ARABIDOPSIS RESPONSE REGULATOR 12); transcription factor/ two-component response regulator | chr2:10724490-10726961 REVERSEvery weakly similar to (90.1) PRR95_ORYSA Two-component response regulator-like PRR95 (Pseudo-response regulator 95) (OsPRR95) - Oryza sativa (Rice)REC AtoC Response_reg REC OmpR CheY protein|two-component respo…	-10.4692
27.3.5	RNA.regulation of transcription.ARR	i3_LQ_LWC_c5984/f1p0/3128	Transcript	weakly similar to ( 178) AT3G57040 | Symbols: ARR9, ATRR4 | ARR9 (RESPONSE REGULATOR 9); transcription regulator/ two-component response regulator | chr3:21110059-21111228 FORWARDREC protein|OsRR4 type-A response regulator, expressed	2.62451
27.3.5	RNA.regulation of transcription.ARR	i1_LQ_LWC_c36348/f1p0/1452	Transcript	weakly similar to ( 125) AT1G59940 | Symbols: ARR3 | ARR3 (RESPONSE REGULATOR 3); transcription regulator/ two-component response regulator | chr1:22065894-22066895 REVERSEREC REC AtoC Response_reg CheY PleD protein|OsRR1 type-A response regulator, expressed	6.81594
27.3.6	RNA.regulation of transcription.bHLH,Basic Helix-Loop-Helix family	i7_LQ_LWC_c373/f1p0/7424	Transcript	very weakly similar to (82.0) AT5G43650 | Symbols: | basic helix-loop-helix (bHLH) family protein | chr5:17533310-17534758 REVERSE protein|helix-loop-helix DNA-binding domain containing protein, expressed	0
27.3.6	RNA.regulation of transcription.bHLH,Basic Helix-Loop-Helix family	i2_LQ_LWC_c102483/f1p0/2711	Transcript	moderately similar to ( 276) AT1G12860 | Symbols: SCRM2, ICE2 | SCRM2 (SCREAM 2); DNA binding / transcription factor | chr1:4382223-4386392 FORWARD protein|inducer of CBF expression 1, putative, expressed	-7.24865
27.3.6	RNA.regulation of transcription.bHLH,Basic Helix-Loop-Helix family	i1_LQ_LWC_c36328/f1p21/1749	Transcript	weakly similar to ( 160) AT5G48560 | Symbols: | basic helix-loop-helix (bHLH) family protein | chr5:19684160-19686871 FORWARD protein|BHLH transcription factor, putative, expressed	12.1946
27.3.6	RNA.regulation of transcription.bHLH,Basic Helix-Loop-Helix family	i1_LQ_LWC_c20136/f1p1/1918	Transcript	weakly similar to ( 131) AT5G54680 | Symbols: ILR3 | ILR3 (iaa-leucine resistant3); DNA binding / transcription factor | chr5:22217270-22218993 FORWARD protein|basic helix-loop-helix DND-binding domain containing protein, expressed	4.67131
27.3.6	RNA.regulation of transcription.bHLH,Basic Helix-Loop-Helix family	i1_LQ_LWC_c19586/f1p0/1685	Transcript	weakly similar to ( 135) AT1G05805 | Symbols: | basic helix-loop-helix (bHLH) family protein | chr1:1744843-1747427 FORWARD protein|helix-loop-helix DNA-binding domain containing protein, expressed	10.7474
27.3.6	RNA.regulation of transcription.bHLH,Basic Helix-Loop-Helix family	i1_LQ_LWC_c16864/f1p0/1632	Transcript	weakly similar to ( 147) AT1G05805 | Symbols: | basic helix-loop-helix (bHLH) family protein | chr1:1744843-1747427 FORWARD protein|helix-loop-helix DNA-binding domain containing protein, expressed	3.07648
27.3.6	RNA.regulation of transcription.bHLH,Basic Helix-Loop-Helix family	i2_LQ_LWC_c104677/f1p1/2891	Transcript	moderately similar to ( 219) AT2G27230 | Symbols: LHW | LHW (LONESOME HIGHWAY); protein homodimerization/ transcription activator/ transcription factor | chr2:11650895-11653840 FORWARD protein|helix-loop-helix DNA-binding protein, putative, expressed	-1.34548
27.3.6	RNA.regulation of transcription.bHLH,Basic Helix-Loop-Helix family	i2_LQ_LWC_c23902/f1p0/2516	Transcript	very weakly similar to (97.4) AT3G47640 | Symbols: | basic helix-loop-helix (bHLH) family protein | chr3:17568035-17569101 FORWARD protein|helix-loop-helix DNA-binding domain containing protein, expressed	6.10852
27.3.6	RNA.regulation of transcription.bHLH,Basic Helix-Loop-Helix family	i1_HQ_LWC_c39571/f2p0/1388	Transcript	weakly similar to ( 161) AT1G68920 | Symbols: | basic helix-loop-helix (bHLH) family protein | chr1:25915620-25917675 FORWARD protein|BHLH transcription factor, putative, expressed	5.95013
27.3.6	RNA.regulation of transcription.bHLH,Basic Helix-Loop-Helix family	i1_LQ_LWC_c11710/f1p0/1877	Transcript	weakly similar to ( 192) AT5G54680 | Symbols: ILR3 | ILR3 (iaa-leucine resistant3); DNA binding / transcription factor | chr5:22217270-22218993 FORWARD protein|basic helix-loop-helix DND-binding domain containing protein, expressed	3.87
27.3.6	RNA.regulation of transcription.bHLH,Basic Helix-Loop-Helix family	i1_LQ_LWC_c19407/f1p1/1998	Transcript	weakly similar to ( 117) AT5G08130 | Symbols: | BIM1; DNA binding / protein binding / transcription factor | chr5:2606655-2608652 REVERSE protein|transcription factor BIM2, putative, expressed	4.67262
27.3.6	RNA.regulation of transcription.bHLH,Basic Helix-Loop-Helix family	i0_LQ_LWC_c744/f1p0/869	Transcript	weakly similar to ( 125) AT4G34530 | Symbols: CIB1 | CIB1 (CRYPTOCHROME-INTERACTING BASIC-HELIX-LOOP-HELIX 1); DNA binding / transcription factor | chr4:16498466-16499946 FORWARD protein|basic helix-loop-helix, putative, expressed	5.18123
27.3.6	RNA.regulation of transcription.bHLH,Basic Helix-Loop-Helix family	i1_LQ_LWC_c22620/f1p0/1896	Transcript	very weakly similar to (97.1) AT5G56960 | Symbols: | basic helix-loop-helix (bHLH) family protein | chr5:23038703-23041174 REVERSE protein|helix-loop-helix DNA-binding domain containing protein, expressed	-3.34071
27.3.6	RNA.regulation of transcription.bHLH,Basic Helix-Loop-Helix family	i1_HQ_LWC_c4240/f2p0/1723	Transcript	weakly similar to ( 182) AT1G72210 | Symbols: | basic helix-loop-helix (bHLH) family protein (bHLH096) | chr1:27180066-27182268 FORWARD protein|helix-loop-helix DNA-binding protein, putative, expressed	0
27.3.6	RNA.regulation of transcription.bHLH,Basic Helix-Loop-Helix family	i1_LQ_LWC_c26613/f1p0/1381	Transcript	weakly similar to ( 111) AT3G56970 | Symbols: BHLH038, ORG2 | BHLH038; DNA binding / transcription factor | chr3:21084204-21085094 REVERSE protein|helix-loop-helix DNA-binding domain containing protein, expressed	3.87534
27.3.6	RNA.regulation of transcription.bHLH,Basic Helix-Loop-Helix family	i1_LQ_LWC_c30973/f1p0/1663	Transcript	weakly similar to ( 157) AT4G02590 | Symbols: UNE12 | UNE12 (unfertilized embryo sac 12); DNA binding / transcription factor | chr4:1137968-1140117 REVERSE protein|BHLH transcription factor, putative, expressed	4.32574
27.3.6	RNA.regulation of transcription.bHLH,Basic Helix-Loop-Helix family	i1_LQ_LWC_c31826/f1p0/1753	Transcript	weakly similar to ( 145) AT3G07340 | Symbols: | basic helix-loop-helix (bHLH) family protein | chr3:2341188-2343288 REVERSE protein|BHLH transcription factor, putative, expressed	-10.2262
27.3.6	RNA.regulation of transcription.bHLH,Basic Helix-Loop-Helix family	i1_LQ_LWC_c42201/f1p0/1048	Transcript	protein|helix-loop-helix DNA-binding domain containing protein, expressed	6.09671
27.3.6	RNA.regulation of transcription.bHLH,Basic Helix-Loop-Helix family	i2_LQ_LWC_c48337/f1p0/2229	Transcript	weakly similar to ( 134) AT5G58010 | Symbols: | basic helix-loop-helix (bHLH) family protein | chr5:23483670-23484889 REVERSE protein|BHLH transcription factor, putative, expressed	11.9262
27.3.6	RNA.regulation of transcription.bHLH,Basic Helix-Loop-Helix family	i1_HQ_LWC_c7998/f2p0/1846	Transcript	weakly similar to ( 181) AT2G31210 | Symbols: | basic helix-loop-helix (bHLH) family protein | chr2:13296655-13298139 FORWARD protein|helix-loop-helix DNA-binding domain containing protein, expressed	-5.41511
27.3.6	RNA.regulation of transcription.bHLH,Basic Helix-Loop-Helix family	i1_LQ_LWC_c23539/f1p0/1729	Transcript	very weakly similar to (99.8) AT5G08130 | Symbols: | BIM1; DNA binding / protein binding / transcription factor | chr5:2606655-2608652 REVERSE protein|helix-loop-helix DNA-binding domain containing protein, expressed	-3.2444
27.3.6	RNA.regulation of transcription.bHLH,Basic Helix-Loop-Helix family	i1_LQ_LWC_c37910/f1p2/1185	Transcript	weakly similar to ( 160) AT5G54680 | Symbols: ILR3 | ILR3 (iaa-leucine resistant3); DNA binding / transcription factor | chr5:22217270-22218993 FORWARD protein|basic helix-loop-helix DND-binding domain containing protein, expressed	14.6541
27.3.6	RNA.regulation of transcription.bHLH,Basic Helix-Loop-Helix family	i1_LQ_LWC_c14052/f1p1/1290	Transcript	protein|helix-loop-helix DNA-binding domain containing protein, expressed	-10.4452
27.3.6	RNA.regulation of transcription.bHLH,Basic Helix-Loop-Helix family	i3_LQ_LWC_c9982/f1p0/3230	Transcript	weakly similar to ( 121) AT4G37850 | Symbols: | basic helix-loop-helix (bHLH) family protein | chr4:17796362-17797647 REVERSE protein|helix-loop-helix DNA-binding protein, putative, expressed	-10.8249
27.3.6	RNA.regulation of transcription.bHLH,Basic Helix-Loop-Helix family	i2_LQ_LWC_c90172/f1p0/2729	Transcript	moderately similar to ( 277) AT3G26744 | Symbols: ICE1, ATICE1, SCRM | ICE1 (INDUCER OF CBF EXPRESSION 1); DNA binding / transcription activator/ transcription factor | chr3:9832953-9834790 REVERSE protein|inducer of CBF expression 2, putative, expressed	-8.52203
27.3.6	RNA.regulation of transcription.bHLH,Basic Helix-Loop-Helix family	i2_LQ_LWC_c83983/f1p0/2153	Transcript	weakly similar to ( 104) AT1G09530 | Symbols: PIF3, POC1, PAP3 | PIF3 (PHYTOCHROME INTERACTING FACTOR 3); DNA binding / protein binding / transcription factor/ transcription regulator | chr1:3077216-3079367 FORWARD protein|phytochrome-interacting factor 4, putative, expressed	9.27477
27.3.6	RNA.regulation of transcription.bHLH,Basic Helix-Loop-Helix family	i1_HQ_LWC_c4595/f4p1/1987	Transcript	weakly similar to ( 166) AT1G69010 | Symbols: BIM2 | BIM2 (BES1-interacting Myc-like protein 2); DNA binding / transcription factor | chr1:25941804-25943599 FORWARD protein|transcription factor BIM2, putative, expressed	-6.81835
27.3.6	RNA.regulation of transcription.bHLH,Basic Helix-Loop-Helix family	i1_LQ_LWC_c21713/f1p0/1977	Transcript	weakly similar to ( 146) AT2G22750 | Symbols: | basic helix-loop-helix (bHLH) family protein | chr2:9672145-9673624 FORWARD protein|helix-loop-helix DNA-binding domain containing protein, expressed	-0.777436
27.3.6	RNA.regulation of transcription.bHLH,Basic Helix-Loop-Helix family	i1_LQ_LWC_c34059/f1p0/1878	Transcript	weakly similar to ( 116) AT1G09530 | Symbols: PIF3, POC1, PAP3 | PIF3 (PHYTOCHROME INTERACTING FACTOR 3); DNA binding / protein binding / transcription factor/ transcription regulator | chr1:3077216-3079367 FORWARD protein|helix-loop-helix DNA-binding domain containing protein, expressed	-10.317
27.3.6	RNA.regulation of transcription.bHLH,Basic Helix-Loop-Helix family	i3_LQ_LWC_c3571/f1p30/3448	Transcript	moderately similar to ( 247) AT4G38070 | Symbols: | bHLH family protein | chr4:17876535-17882569 FORWARD Smc protein|centromere protein, putative, expressed	10.0407
27.3.6	RNA.regulation of transcription.bHLH,Basic Helix-Loop-Helix family	i1_LQ_LWC_c18992/f1p1/1923	Transcript	very weakly similar to (81.6) AT2G41130 | Symbols: | basic helix-loop-helix (bHLH) family protein | chr2:17143360-17144686 FORWARD protein|basic helix-loop-helix, putative, expressed	-2.70634
27.3.7	RNA.regulation of transcription.C2C2(Zn) CO-like, Constans-like zinc finger family	i2_HQ_LWC_c24793/f2p0/2264	Transcript	weakly similar to ( 115) AT5G57180 | Symbols: CIA2 | CIA2 (CHLOROPLAST IMPORT APPARATUS 2); transcription regulator | chr5:23168393-23169523 FORWARD protein|CCT motif family protein, expressed	9.1927
27.3.7	RNA.regulation of transcription.C2C2(Zn) CO-like, Constans-like zinc finger family	i1_LQ_LWC_c21707/f1p0/1650	Transcript	weakly similar to ( 142) AT2G47890 | Symbols: | zinc finger (B-box type) family protein | chr2:19608245-19609476 FORWARD protein|CCT/B-box zinc finger protein, putative, expressed	-6.70919
27.3.7	RNA.regulation of transcription.C2C2(Zn) CO-like, Constans-like zinc finger family	i1_HQ_LWC_c10066/f3p9/1665	Transcript	very weakly similar to (84.7) AT5G57660 | Symbols: ATCOL5, COL5 | zinc finger (B-box type) family protein | chr5:23355573-23356729 FORWARDCCT protein|CCT/B-box zinc finger protein, putative, expressed	11.9431
27.3.7	RNA.regulation of transcription.C2C2(Zn) CO-like, Constans-like zinc finger family	i1_HQ_LWC_c8163/f2p0/1709	Transcript	weakly similar to ( 107) AT2G47890 | Symbols: | zinc finger (B-box type) family protein | chr2:19608245-19609476 FORWARD protein|CCT/B-box zinc finger protein, putative, expressed	2.84739
27.3.7	RNA.regulation of transcription.C2C2(Zn) CO-like, Constans-like zinc finger family	i1_LQ_LWC_c18212/f1p8/1578	Transcript	weakly similar to ( 109) AT1G78600 | Symbols: LZF1, STH3 | LZF1 (LIGHT-REGULATED ZINC FINGER PROTEIN 1); transcription factor/ zinc ion binding | chr1:29567370-29568662 FORWARD protein|B-box zinc finger family protein, putative, expressed	-2.48921
27.3.7	RNA.regulation of transcription.C2C2(Zn) CO-like, Constans-like zinc finger family	i1_LQ_LWC_c34332/f1p4/1412	Transcript	weakly similar to ( 140) AT1G78600 | Symbols: LZF1, STH3 | LZF1 (LIGHT-REGULATED ZINC FINGER PROTEIN 1); transcription factor/ zinc ion binding | chr1:29567370-29568662 FORWARD protein|B-box zinc finger family protein, putative, expressed	-9.82352
27.3.7	RNA.regulation of transcription.C2C2(Zn) CO-like, Constans-like zinc finger family	i1_LQ_LWC_c4600/f1p1/1690	Transcript	weakly similar to ( 172) AT1G78600 | Symbols: LZF1, STH3 | LZF1 (LIGHT-REGULATED ZINC FINGER PROTEIN 1); transcription factor/ zinc ion binding | chr1:29567370-29568662 FORWARD protein|B-box zinc finger family protein, putative, expressed	0
27.3.8	RNA.regulation of transcription.C2C2(Zn) DOF zinc finger family	i1_LQ_LWC_c22543/f1p4/2016	Transcript	weakly similar to ( 139) AT5G02460 | Symbols: | Dof-type zinc finger domain-containing protein | chr5:539549-541058 REVERSEweakly similar to ( 104) PBF_MAIZE Dof zinc finger protein PBF (Prolamin box-binding factor) - Zea mays (Maize)zf-Dof protein|dof zinc finger domain containing protein, putative, expressed	-5.47053
27.3.8	RNA.regulation of transcription.C2C2(Zn) DOF zinc finger family	i1_LQ_LWC_c10594/f1p2/1859	Transcript	weakly similar to ( 153) AT3G55370 | Symbols: OBP3 | OBP3 (OBF-BINDING PROTEIN 3); DNA binding / transcription factor | chr3:20527198-20528876 FORWARDweakly similar to ( 108) PBF_MAIZE Dof zinc finger protein PBF (Prolamin box-binding factor) - Zea mays (Maize)zf-Dof protein|dof zinc finger domain containing protein, putative, expressed	-2.9588
27.3.8	RNA.regulation of transcription.C2C2(Zn) DOF zinc finger family	i1_LQ_LWC_c13816/f1p4/1261	Transcript	weakly similar to ( 101) AT5G66940 | Symbols: | Dof-type zinc finger domain-containing protein | chr5:26727989-26728666 REVERSEvery weakly similar to (92.0) PBF_MAIZE Dof zinc finger protein PBF (Prolamin box-binding factor) - Zea mays (Maize)zf-Dof protein|dof zinc finger domain containing protein, putative, expressed	11.941
27.3.8	RNA.regulation of transcription.C2C2(Zn) DOF zinc finger family	i1_LQ_LWC_c13797/f1p4/1230	Transcript	weakly similar to ( 145) AT4G24060 | Symbols: | Dof-type zinc finger domain-containing protein | chr4:12503970-12505417 FORWARDweakly similar to ( 118) PBF_MAIZE Dof zinc finger protein PBF (Prolamin box-binding factor) - Zea mays (Maize)zf-Dof protein|dof zinc finger domain containing protein, putative, expressed	10.1366
27.3.8	RNA.regulation of transcription.C2C2(Zn) DOF zinc finger family	i1_LQ_LWC_c33744/f1p0/2008	Transcript	weakly similar to ( 143) AT4G24060 | Symbols: | Dof-type zinc finger domain-containing protein | chr4:12503970-12505417 FORWARDweakly similar to ( 117) PBF_MAIZE Dof zinc finger protein PBF (Prolamin box-binding factor) - Zea mays (Maize)zf-Dof protein|dof zinc finger domain containing protein, putative, expressed	10.3429
27.3.8	RNA.regulation of transcription.C2C2(Zn) DOF zinc finger family	i0_LQ_LWC_c1280/f1p5/992	Transcript	weakly similar to ( 103) AT1G28310 | Symbols: | Dof-type zinc finger domain-containing protein | chr1:9912534-9913685 REVERSEweakly similar to ( 180) MNB1A_MAIZE Dof zinc finger protein MNB1A - Zea mays (Maize)zf-Dof protein|dof zinc finger domain containing protein, putative, expressed	4.53011
27.3.8	RNA.regulation of transcription.C2C2(Zn) DOF zinc finger family	i1_LQ_LWC_c11285/f1p0/1800	Transcript	weakly similar to ( 142) AT5G02460 | Symbols: | Dof-type zinc finger domain-containing protein | chr5:539549-541058 REVERSEweakly similar to ( 115) PBF_MAIZE Dof zinc finger protein PBF (Prolamin box-binding factor) - Zea mays (Maize)zf-Dof protein|dof zinc finger domain containing protein, putative, expressed	-9.67677
27.3.8	RNA.regulation of transcription.C2C2(Zn) DOF zinc finger family	i1_LQ_LWC_c14373/f1p0/1300	Transcript	very weakly similar to (97.8) AT5G60850 | Symbols: OBP4 | OBP4; DNA binding / transcription factor | chr5:24480578-24481501 FORWARDweakly similar to ( 125) MNB1A_MAIZE Dof zinc finger protein MNB1A - Zea mays (Maize)zf-Dof protein|dof zinc finger domain containing protein, putative, expressed	0
27.3.9	RNA.regulation of transcription.C2C2(Zn) GATA transcription factor family	i1_LQ_LWC_c36813/f1p0/1755	Transcript	weakly similar to ( 147) AT2G45050 | Symbols: | zinc finger (GATA type) family protein | chr2:18582958-18583845 FORWARD protein|GATA zinc finger domain containing protein, expressed	9.34873
27.3.9	RNA.regulation of transcription.C2C2(Zn) GATA transcription factor family	i2_LQ_LWC_c4786/f1p0/2970	Transcript	weakly similar to ( 166) AT1G51600 | Symbols: ZML2, TIFY2A | TIFY2A; sequence-specific DNA binding / transcription factor/ zinc ion binding | chr1:19133176-19135252 FORWARD protein|GATA transcription factor 25, putative, expressed	9.84586
27.3.9	RNA.regulation of transcription.C2C2(Zn) GATA transcription factor family	i1_LQ_LWC_c10425/f1p0/1673	Transcript	very weakly similar to (94.0) AT2G28340 | Symbols: | zinc finger (GATA type) family protein | chr2:12103672-12106172 FORWARD protein|GATA zinc finger domain containing protein, expressed	6.4067
27.3.9	RNA.regulation of transcription.C2C2(Zn) GATA transcription factor family	i1_HQ_LWC_c16703/f3p3/1604	Transcript	moderately similar to ( 213) AT3G21175 | Symbols: ZML1 | ZML1 (ZIM-LIKE 1); transcription factor | chr3:7422832-7423765 FORWARD protein|GATA transcription factor 25, putative, expressed	12.1394
27.3.9	RNA.regulation of transcription.C2C2(Zn) GATA transcription factor family	i1_LQ_LWC_c24237/f1p0/1838	Transcript	weakly similar to ( 189) AT3G21175 | Symbols: ZML1 | ZML1 (ZIM-LIKE 1); transcription factor | chr3:7422832-7423765 FORWARD protein|GATA transcription factor 25, putative, expressed	-10.0407
27.3.9	RNA.regulation of transcription.C2C2(Zn) GATA transcription factor family	i2_LQ_LWC_c75600/f1p0/2077	Transcript	weakly similar to ( 120) AT3G54810 | Symbols: BME3-ZF, BME3 | zinc finger (GATA type) family protein | chr3:20296957-20298236 FORWARD protein|GATA zinc finger domain containing protein, expressed	0
27.3.9	RNA.regulation of transcription.C2C2(Zn) GATA transcription factor family	i2_LQ_LWC_c107933/f1p0/2180	Transcript	weakly similar to ( 132) AT5G58280 | Symbols: | transcriptional factor B3 family protein | chr5:23567338-23568670 FORWARD protein|B3 DNA binding domain containing protein, expressed	0
27.3.9	RNA.regulation of transcription.C2C2(Zn) GATA transcription factor family	i2_LQ_LWC_c88854/f1p0/2208	Transcript	weakly similar to ( 158) AT5G25830 | Symbols: | zinc finger (GATA type) family protein | chr5:9004398-9005502 REVERSE protein|GATA zinc finger domain containing protein, expressed	-1.85241
27.3.9	RNA.regulation of transcription.C2C2(Zn) GATA transcription factor family	i2_LQ_LWC_c39385/f1p0/2385	Transcript	weakly similar to ( 169) AT4G17570 | Symbols: | zinc finger (GATA type) family protein | chr4:9784329-9786974 REVERSE protein|GATA zinc finger domain containing protein, expressed	11.5671
27.3.10	RNA.regulation of transcription.C2C2(Zn) YABBY family	i1_LQ_LWC_c42641/f1p3/1003	Transcript	weakly similar to ( 141) AT1G08465 | Symbols: YAB2 | YAB2 (YABBY2); transcription factor | chr1:2676033-2679382 FORWARDmoderately similar to ( 276) YAB1_ORYSA Protein YABBY (OsYAB1) (Filamentous flower protein 1) - Oryza sativa (Rice)YABBY protein|YABBY domain containing protein, putative, expressed	-10.5774
27.3.11	RNA.regulation of transcription.C2H2 zinc finger family	i2_LQ_LWC_c103809/f1p5/2502	Transcript	moderately similar to ( 225) AT1G30970 | Symbols: SUF4 | SUF4 (suppressor of FRIGIDA4); DNA binding / protein heterodimerization/ protein homodimerization/ transcription factor | chr1:11040613-11043433 REVERSE protein|ZOS9-19 - C2H2 zinc finger protein, expressed	-3.68504
27.3.11	RNA.regulation of transcription.C2H2 zinc finger family	i1_LQ_LWC_c4570/f1p0/1482	Transcript	weakly similar to ( 102) AT5G04390 | Symbols: | zinc finger (C2H2 type) family protein | chr5:1239166-1240254 FORWARD protein|ZOS2-19 - C2H2 zinc finger protein, expressed	9.13304
27.3.11	RNA.regulation of transcription.C2H2 zinc finger family	i1_LQ_LWC_c18826/f1p3/1443	Transcript	weakly similar to ( 134) AT3G51060 | Symbols: STY1, SRS1 | STY1 (STYLISH 1); protein heterodimerization/ transcription factor | chr3:18964606-18966130 FORWARDDUF702 protein|LRP1, putative, expressed	6.0955
27.3.11	RNA.regulation of transcription.C2H2 zinc finger family	i1_LQ_LWC_c34260/f1p24/2050	Transcript	moderately similar to ( 284) AT1G03840 | Symbols: MGP | MGP (Magpie); nucleic acid binding / protein binding / transcription factor/ zinc ion binding | chr1:967596-970058 REVERSE protein|ZOS3-04 - C2H2 zinc finger protein, expressed	-2.48059
27.3.11	RNA.regulation of transcription.C2H2 zinc finger family	i1_LQ_LWC_c26110/f1p0/1142	Transcript	weakly similar to ( 103) AT5G67450 | Symbols: AZF1 | AZF1 (ARABIDOPSIS ZINC-FINGER PROTEIN 1); DNA binding / nucleic acid binding / transcription factor/ transcription repressor/ zinc ion binding | chr5:26919142-26919879 REVERSEvery weakly similar to (88.2) ZFP1_WHEAT Zinc-finger protein 1 (WZF1) - Triticum aestivum (Wheat) protein|ZOS12-09 - C2H2 zinc finger protein, expressed	3.1967
27.3.11	RNA.regulation of transcription.C2H2 zinc finger family	i0_LQ_LWC_c1425/f1p1/906	Transcript	very weakly similar to ( 100) AT1G27730 | Symbols: STZ, ZAT10 | STZ (salt tolerance zinc finger); nucleic acid binding / transcription factor/ transcription repressor/ zinc ion binding | chr1:9648302-9648985 REVERSEweakly similar to ( 102) ZFP1_WHEAT Zinc-finger protein 1 (WZF1) - Triticum aestivum (Wheat) protein|ZOS3-12 - C2H2 zinc finger protein, expressed	-3.89317
27.3.11	RNA.regulation of transcription.C2H2 zinc finger family	i2_LQ_LWC_c17416/f1p7/2150	Transcript	moderately similar to ( 338) AT5G62090 | Symbols: | FUNCTIONS IN: molecular_function unknown; INVOLVED IN: biological_process unknown; LOCATED IN: cellular_component unknown; EXPRESSED IN: 17 plant structures; EXPRESSED DURING: 10 growth stages; BEST Arabidopsis thaliana protein match is: SLK1 (SEUSS-LIKE 1); transcription regulator (TAIR:AT4G25520.1); Has 38202 Blast hits to 15459 proteins in 74…	10.3225
27.3.11	RNA.regulation of transcription.C2H2 zinc finger family	i1_LQ_LWC_c24027/f1p1/1907	Transcript	moderately similar to ( 217) AT1G72050 | Symbols: TFIIIA | TFIIIA (TRANSCRIPTION FACTOR IIIA); nucleic acid binding / zinc ion binding | chr1:27115808-27117228 FORWARD protein|ZOS2-02 - C2H2 zinc finger protein, expressed	9.70821
27.3.11	RNA.regulation of transcription.C2H2 zinc finger family	i1_HQ_LWC_c24410/f2p2/1761	Transcript	moderately similar to ( 302) AT1G72050 | Symbols: TFIIIA | TFIIIA (TRANSCRIPTION FACTOR IIIA); nucleic acid binding / zinc ion binding | chr1:27115808-27117228 FORWARD protein|ZOS5-03 - C2H2 zinc finger protein, expressed	9.35098
27.3.11	RNA.regulation of transcription.C2H2 zinc finger family	i1_LQ_LWC_c13759/f1p0/1168	Transcript	weakly similar to ( 138) AT1G70790 | Symbols: | C2 domain-containing protein | chr1:26700724-26702127 FORWARD protein|GTPase activating protein, putative, expressed	10.1789
27.3.11	RNA.regulation of transcription.C2H2 zinc finger family	i1_LQ_LWC_c13857/f1p0/1343	Transcript	moderately similar to ( 414) AT3G07940 | Symbols: | zinc finger and C2 domain protein, putative | chr3:2529542-2531368 FORWARD ArfGap ArfGap COG5347 C2 C2 protein|stromal membrane-associated protein, putative, expressed	10.6067
27.3.11	RNA.regulation of transcription.C2H2 zinc finger family	i3_LQ_LWC_c34541/f1p0/3470	Transcript	moderately similar to ( 302) AT1G03840 | Symbols: MGP | MGP (Magpie); nucleic acid binding / protein binding / transcription factor/ zinc ion binding | chr1:967596-970058 REVERSE protein|ZOS2-08 - C2H2 zinc finger protein, expressed	6.96188
27.3.11	RNA.regulation of transcription.C2H2 zinc finger family	i1_HQ_LWC_c37424/f2p0/1351	Transcript	moderately similar to ( 220) AT1G34370 | Symbols: STOP1 | STOP1 (sensitive to proton rhizotoxicity 1); nucleic acid binding / transcription factor/ zinc ion binding | chr1:12551449-12552501 FORWARD protein|ZOS2-11 - C2H2 zinc finger protein, expressed	12.2687
27.3.11	RNA.regulation of transcription.C2H2 zinc finger family	i1_HQ_LWC_c12103/f2p2/1564	Transcript	moderately similar to ( 406) AT4G31420 | Symbols: | zinc finger (C2H2 type) family protein | chr4:15245987-15247763 REVERSE protein|ZOS6-08 - C2H2 zinc finger protein, expressed	7.04069
27.3.11	RNA.regulation of transcription.C2H2 zinc finger family	i2_HQ_LWC_c115519/f11p1/2574	Transcript	highly similar to ( 517) AT2G27100 | Symbols: SE | SE (SERRATE); DNA binding / transcription factor | chr2:11572587-11576357 FORWARD protein|ZOS6-09 - C2H2 zinc finger protein, expressed	0
27.3.12	RNA.regulation of transcription.C3H zinc finger family	i2_LQ_LWC_c76175/f1p0/2087	Transcript	weakly similar to ( 187) AT1G66810 | Symbols: | zinc finger (CCCH-type) family protein | chr1:24927613-24928619 REVERSE protein|zinc finger C-x8-C-x5-C-x3-H type family protein, expressed	-3.70961
27.3.12	RNA.regulation of transcription.C3H zinc finger family	i1_HQ_LWC_c1703/f10p3/1660	Transcript	moderately similar to ( 309) AT3G02830 | Symbols: ZFN1 | ZFN1 (ZINC FINGER PROTEIN 1); DNA binding / nuclease/ nucleic acid binding | chr3:614075-615916 FORWARDhighly similar to ( 592) ZFNL2_ORYSA Zinc finger CCCH domain-containing protein ZFN-like 2 - Oryza sativa (Rice) protein|zinc finger C-x8-C-x5-C-x3-H type family protein, expressed	11.118
27.3.12	RNA.regulation of transcription.C3H zinc finger family	i1_HQ_LWC_c37520/f2p0/1375	Transcript	weakly similar to ( 167) AT5G06770 | Symbols: | KH domain-containing protein / zinc finger (CCCH type) family protein | chr5:2090937-2092787 REVERSE protein|zinc finger C-x8-C-x5-C-x3-H type family protein, expressed	13.2695
27.3.12	RNA.regulation of transcription.C3H zinc finger family	i2_HQ_LWC_c78324/f14p1/2180	Transcript	moderately similar to ( 329) AT2G47850 | Symbols: | zinc finger (CCCH-type) family protein | chr2:19595953-19598119 FORWARDhighly similar to ( 769) ZFNL1_ORYSA Zinc finger CCCH domain-containing protein ZFN-like 1 - Oryza sativa (Rice) protein|zinc finger C-x8-C-x5-C-x3-H type family protein, expressed	11.4956
27.3.12	RNA.regulation of transcription.C3H zinc finger family	i1_LQ_LWC_c10320/f1p0/1958	Transcript	weakly similar to ( 147) AT5G06770 | Symbols: | KH domain-containing protein / zinc finger (CCCH type) family protein | chr5:2090937-2092787 REVERSE protein|zinc finger C-x8-C-x5-C-x3-H type family protein, expressed	6.95214
27.3.13	RNA.regulation of transcription.CCAAT box binding factor family, DR1	i4_LQ_LWC_c22190/f1p7/4886	Transcript	highly similar to ( 737) AT1G72440 | Symbols: EDA25 | EDA25 (embryo sac development arrest 25) | chr1:27268325-27273596 REVERSE COG5593 CBF protein|CCAAT/enhancer-binding protein, putative, expressed	9.80657
27.3.14	RNA.regulation of transcription.CCAAT box binding factor family, HAP2	i1_LQ_LWC_c14338/f1p1/1278	Transcript	weakly similar to ( 118) AT3G14020 | Symbols: NF-YA6 | NF-YA6 (NUCLEAR FACTOR Y, SUBUNIT A6); transcription factor | chr3:4642968-4644301 FORWARD CBF CBFB_NFYA protein|nuclear transcription factor Y subunit, putative, expressed	2.23254
27.3.14	RNA.regulation of transcription.CCAAT box binding factor family, HAP2	i1_LQ_LWC_c25840/f1p1/1079	Transcript	weakly similar to ( 135) AT3G14020 | Symbols: NF-YA6 | NF-YA6 (NUCLEAR FACTOR Y, SUBUNIT A6); transcription factor | chr3:4642968-4644301 FORWARD CBF CBFB_NFYA protein|nuclear transcription factor Y subunit, putative, expressed	10.4914
27.3.15	RNA.regulation of transcription.CCAAT box binding factor family, HAP3	i1_LQ_LWC_c11891/f1p12/1718	Transcript	weakly similar to ( 161) AT2G37060 | Symbols: NF-YB8 | NF-YB8 (NUCLEAR FACTOR Y, SUBUNIT B8); transcription factor | chr2:15576336-15577660 FORWARDmoderately similar to ( 226) NFYB4_ORYSA Nuclear transcription factor Y subunit B-4 (OsNF-YB-4) (Transcriptional activator HAP3C) - Oryza sativa (Rice) CBFD_NFYB_HMF protein|histone-like transcription factor and archaeal histone, putative, expressed	-2.0371
27.3.16	RNA.regulation of transcription.CCAAT box binding factor family, HAP5	i1_LQ_LWC_c13309/f1p0/1219	Transcript	moderately similar to ( 209) AT1G56170 | Symbols: HAP5B, ATHAP5B, NF-YC2 | NF-YC2 (NUCLEAR FACTOR Y, SUBUNIT C2); DNA binding / transcription activator/ transcription factor | chr1:21025118-21025717 FORWARD HAP5 protein|core histone H2A/H2B/H3/H4, putative, expressed	4.2552
27.3.17	RNA.regulation of transcription.CPP(Zn),CPP1-related transcription factor family	i2_LQ_LWC_c54644/f1p1/2861	Transcript	moderately similar to ( 261) AT4G14770 | Symbols: TCX2, ATTCX2 | TCX2 (TESMIN/TSO1-LIKE CXC 2); transcription factor | chr4:8481522-8484825 REVERSE protein|tesmin/TSO1-like CXC domain containing protein, expressed	4.24078
27.3.18	RNA.regulation of transcription.E2F/DP transcription factor family	i1_LQ_LWC_c12512/f1p0/2032	Transcript	moderately similar to ( 222) AT5G22220 | Symbols: E2F1, E2FB, ATE2FB | E2F1; DNA binding / protein binding / transcription factor | chr5:7360749-7364120 FORWARD E2F_TDP protein|transposon protein, putative, CACTA, En/Spm sub-class, expressed	6.2656
27.3.18	RNA.regulation of transcription.E2F/DP transcription factor family	i1_LQ_LWC_c9082/f1p1/1597	Transcript	moderately similar to ( 293) AT3G48160 | Symbols: DEL1, E2L3, E2FE | DEL1 (DP-E2F-LIKE 1); DNA binding / transcription factor | chr3:17783641-17785846 FORWARD E2F_TDP protein|E2F family transcription factor protein, putative, expressed	10.3335
27.3.18	RNA.regulation of transcription.E2F/DP transcription factor family	i2_LQ_LWC_c86875/f1p1/2414	Transcript	moderately similar to ( 246) AT5G03415 | Symbols: DPB, ATDPB | DPB; protein binding / protein heterodimerization | chr5:842842-845200 FORWARD DP protein|transcription factor Dp, putative, expressed	2.95435
27.3.18	RNA.regulation of transcription.E2F/DP transcription factor family	i1_LQ_LWC_c12026/f1p0/1907	Transcript	moderately similar to ( 306) AT2G36010 | Symbols: E2F3, ATE2FA | E2F3 (E2F TRANSCRIPTION FACTOR 3); DNA binding / transcription factor | chr2:15119688-15122893 FORWARD E2F_TDP protein|E2F family transcription factor protein, putative, expressed	-3.01302
27.3.20	RNA.regulation of transcription.G2-like transcription factor family, GARP	i2_LQ_LWC_c59181/f1p0/2093	Transcript	very weakly similar to (99.0) AT2G02060 | Symbols: | transcription factor | chr2:495691-497609 FORWARD protein|MYB family transcription factor, putative, expressed	8.05871
27.3.20	RNA.regulation of transcription.G2-like transcription factor family, GARP	i1_LQ_LWC_c39452/f2p0/1301	Transcript	moderately similar to ( 236) AT1G79430 | Symbols: APL, WDY | APL (ALTERED PHLOEM DEVELOPMENT); transcription factor/ transcription regulator | chr1:29877521-29879135 REVERSE protein|MYB family transcription factor, putative, expressed	-1.8847
27.3.20	RNA.regulation of transcription.G2-like transcription factor family, GARP	i1_LQ_LWC_c9837/f1p0/1796	Transcript	weakly similar to ( 156) AT3G10760 | Symbols: | myb family transcription factor | chr3:3369814-3370821 FORWARD protein|homeodomain-related, putative, expressed	4.696
27.3.20	RNA.regulation of transcription.G2-like transcription factor family, GARP	i1_LQ_LWC_c30429/f1p0/1597	Transcript	moderately similar to ( 258) AT5G18240 | Symbols: MYR1 | MYR1 (MYb-related protein 1); transcription factor | chr5:6028617-6030573 REVERSE protein|Myb transcription factor, putative, expressed	8.26335
27.3.20	RNA.regulation of transcription.G2-like transcription factor family, GARP	i1_LQ_LWC_c32176/f1p5/1528	Transcript	weakly similar to ( 192) AT4G13640 | Symbols: UNE16 | UNE16 (unfertilized embryo sac 16); transcription factor | chr4:7936864-7938497 REVERSE protein|Myb transcription factor, putative, expressed	7.873
27.3.20	RNA.regulation of transcription.G2-like transcription factor family, GARP	i1_LQ_LWC_c22958/f1p4/1801	Transcript	weakly similar to ( 124) AT2G38300 | Symbols: | DNA binding / transcription factor | chr2:16044175-16045679 REVERSE protein|MYB family transcription factor, putative, expressed	-5.11866
27.3.20	RNA.regulation of transcription.G2-like transcription factor family, GARP	i1_LQ_LWC_c10053/f1p0/1604	Transcript	weakly similar to ( 136) AT2G03500 | Symbols: | myb family transcription factor | chr2:1059926-1062259 FORWARD protein|MYB family transcription factor, putative, expressed	7.50347
27.3.20	RNA.regulation of transcription.G2-like transcription factor family, GARP	i1_HQ_LWC_c4046/f2p0/1642	Transcript	weakly similar to ( 121) AT2G03500 | Symbols: | myb family transcription factor | chr2:1059926-1062259 FORWARD protein|MYB family transcription factor, putative, expressed	12.464
27.3.20	RNA.regulation of transcription.G2-like transcription factor family, GARP	i5_LQ_LWC_c7406/f1p0/5228	Transcript	moderately similar to ( 275) AT5G18240 | Symbols: MYR1 | MYR1 (MYb-related protein 1); transcription factor | chr5:6028617-6030573 REVERSE protein|Myb transcription factor, putative, expressed	9.57647
27.3.20	RNA.regulation of transcription.G2-like transcription factor family, GARP	i2_LQ_LWC_c20805/f1p0/2418	Transcript	very weakly similar to ( 100) AT5G59570 | Symbols: | myb family transcription factor | chr5:24004047-24004943 FORWARD protein|MYB family transcription factor, putative, expressed	3.07737
27.3.21	RNA.regulation of transcription.GRAS transcription factor family	i2_HQ_LWC_c100463/f4p16/2938	Transcript	highly similar to ( 577) AT2G37650 | Symbols: | scarecrow-like transcription factor 9 (SCL9) | chr2:15792623-15794779 FORWARDmoderately similar to ( 211) CIGR2_ORYSA Chitin-inducible gibberellin-responsive protein 2 - Oryza sativa (Rice)GRAS protein|SCARECROW, putative, expressed	-10.6143
27.3.21	RNA.regulation of transcription.GRAS transcription factor family	i2_HQ_LWC_c63642/f2p0/2295	Transcript	moderately similar to ( 412) AT4G37650 | Symbols: SHR, SGR7 | SHR (SHORT ROOT); protein binding / sequence-specific DNA binding / transcription factor | chr4:17691871-17693466 FORWARDweakly similar to ( 144) CIGR2_ORYSA Chitin-inducible gibberellin-responsive protein 2 - Oryza sativa (Rice)GRAS protein|SHR, putative, expressed	-1.79532
27.3.21	RNA.regulation of transcription.GRAS transcription factor family	i1_LQ_LWC_c34328/f1p0/1759	Transcript	moderately similar to ( 388) AT4G37650 | Symbols: SHR, SGR7 | SHR (SHORT ROOT); protein binding / sequence-specific DNA binding / transcription factor | chr4:17691871-17693466 FORWARDweakly similar to ( 138) CIGR2_ORYSA Chitin-inducible gibberellin-responsive protein 2 - Oryza sativa (Rice)GRAS protein|SHORT-ROOT, putative, expressed	-4.81436
27.3.21	RNA.regulation of transcription.GRAS transcription factor family	i4_LQ_LWC_c6819/f1p6/4327	Transcript	weakly similar to ( 196) AT3G13840 | Symbols: | scarecrow transcription factor family protein | chr3:4555305-4556837 REVERSEmoderately similar to ( 229) NSP1_MEDTR Nodulation signaling pathway 1 protein - Medicago truncatula (Barrel medic)GRAS protein|nodulation-signaling pathway 1 protein, putative, expressed	11.2153
27.3.22	RNA.regulation of transcription.HB,Homeobox transcription factor family	i1_LQ_LWC_c27291/f1p0/1329	Transcript	very weakly similar to (99.0) AT4G36740 | Symbols: HB-5, ATHB40 | ATHB40 (ARABIDOPSIS THALIANA HOMEOBOX PROTEIN 40); DNA binding / transcription factor | chr4:17314649-17316314 REVERSE protein|homeobox domain containing protein, expressed	1.86111
27.3.22	RNA.regulation of transcription.HB,Homeobox transcription factor family	i1_LQ_LWC_c11124/f1p0/1886	Transcript	highly similar to ( 807) AT1G52150 | Symbols: ATHB-15, ATHB15, CNA, ICU4 | ATHB-15; DNA binding / transcription factor | chr1:19410118-19413961 REVERSEMEKHLA START START START protein|class III HD-Zip protein 8, putative, expressed	4.02853
27.3.22	RNA.regulation of transcription.HB,Homeobox transcription factor family	i1_LQ_LWC_c30822/f1p0/1553	Transcript	weakly similar to ( 149) AT1G69780 | Symbols: ATHB13 | ATHB13; DNA binding / sequence-specific DNA binding / transcription factor | chr1:26259166-26260465 FORWARD protein|homeobox associated leucine zipper, putative, expressed	1.47415
27.3.22	RNA.regulation of transcription.HB,Homeobox transcription factor family	i1_LQ_LWC_c31012/f1p0/1629	Transcript	moderately similar to ( 280) AT4G08150 | Symbols: KNAT1, BP, BP1 | KNAT1 (KNOTTED-LIKE FROM ARABIDOPSIS THALIANA); transcription factor | chr4:5147969-5150610 REVERSEmoderately similar to ( 382) RSH1_MAIZE Homeobox protein rough sheath 1 - Zea mays (Maize) KNOX2 protein|Homeobox domain containing protein, expressed	5.61375
27.3.22	RNA.regulation of transcription.HB,Homeobox transcription factor family	i1_HQ_LWC_c2556/f2p0/1766	Transcript	moderately similar to ( 233) AT1G23380 | Symbols: KNAT6, KNAT6L, KNAT6S | KNAT6; DNA binding / transcription activator/ transcription factor | chr1:8297499-8302492 REVERSEmoderately similar to ( 210) KNAP2_MALDO Homeobox protein knotted-1-like 2 (KNAP2) - Malus domestica (Apple) (Malus sylvestris) KNOX2 protein|homeobox protein knotted-1-like 6, putative, expressed	10.734
27.3.22	RNA.regulation of transcription.HB,Homeobox transcription factor family	i1_LQ_LWC_c7204/f1p0/1730	Transcript	weakly similar to ( 138) AT2G28610 | Symbols: PRS, WOX3, PRS1 | PRS (PRESSED FLOWER); transcription factor | chr2:12262115-12263286 FORWARDweakly similar to ( 115) WOX3B_MAIZE WUSCHEL-related homeobox 3B (Narrow sheath protein 2) - Zea mays (Maize) protein|homeobox domain containing protein, expressed	-10.8949
27.3.22	RNA.regulation of transcription.HB,Homeobox transcription factor family	i5_LQ_LWC_c10454/f1p0/5056	Transcript	weakly similar to ( 199) AT4G08150 | Symbols: KNAT1, BP, BP1 | KNAT1 (KNOTTED-LIKE FROM ARABIDOPSIS THALIANA); transcription factor | chr4:5147969-5150610 REVERSEmoderately similar to ( 234) RSH1_MAIZE Homeobox protein rough sheath 1 - Zea mays (Maize) protein|homeobox protein knotted-1, putative, expressed	10.3986
27.3.22	RNA.regulation of transcription.HB,Homeobox transcription factor family	i3_LQ_LWC_c21832/f1p36/3607	Transcript	highly similar to ( 677) AT5G46880 | Symbols: HB-7, HDG5 | HB-7 (HOMEOBOX-7); DNA binding / transcription factor | chr5:19031540-19035388 FORWARDSTART START START Homeobox protein|homeobox and START domains containing protein, putative, expressed	-9.16069
27.3.22	RNA.regulation of transcription.HB,Homeobox transcription factor family	i11_LQ_LWC_c28/f1p0/11517	Transcript	moderately similar to ( 259) AT3G19510 | Symbols: HAT3.1 | HAT3.1; DNA binding / sequence-specific DNA binding / transcription activator/ transcription factor | chr3:6763205-6766049 REVERSEmoderately similar to ( 479) HOX1A_MAIZE Homeobox protein HOX1A - Zea mays (Maize) protein|Homeobox domain containing protein, expressed	-4.21671
27.3.22	RNA.regulation of transcription.HB,Homeobox transcription factor family	i1_HQ_LWC_c37211/f4p0/1360	Transcript	moderately similar to ( 381) AT5G25220 | Symbols: KNAT3 | KNAT3 (KNOTTED1-LIKE HOMEOBOX GENE 3); transcription activator/ transcription factor | chr5:8736208-8738087 FORWARDmoderately similar to ( 355) KNAP3_MALDO Homeobox protein knotted-1-like 3 (KNAP3) - Malus domestica (Apple) (Malus sylvestris) protein|homeobox protein knotted-1, putative, expressed	3.89844
27.3.22	RNA.regulation of transcription.HB,Homeobox transcription factor family	i4_LQ_LWC_c6343/f1p0/4364	Transcript	moderately similar to ( 273) AT2G35940 | Symbols: BLH1 | BLH1 (BEL1-LIKE HOMEODOMAIN 1); DNA binding / protein heterodimerization/ protein homodimerization/ transcription factor | chr2:15089171-15091699 REVERSE POX POX protein|homeobox domain containing protein, expressed	7.48297
27.3.22	RNA.regulation of transcription.HB,Homeobox transcription factor family	i1_LQ_LWC_c14937/f2p0/1465	Transcript	moderately similar to ( 392) AT5G25220 | Symbols: KNAT3 | KNAT3 (KNOTTED1-LIKE HOMEOBOX GENE 3); transcription activator/ transcription factor | chr5:8736208-8738087 FORWARDmoderately similar to ( 369) KNAP3_MALDO Homeobox protein knotted-1-like 3 (KNAP3) - Malus domestica (Apple) (Malus sylvestris) protein|homeobox protein knotted-1, putative, expressed	13.8102
27.3.22	RNA.regulation of transcription.HB,Homeobox transcription factor family	i1_LQ_LWC_c7483/f1p2/1790	Transcript	weakly similar to ( 176) AT4G32980 | Symbols: ATH1 | ATH1 (ARABIDOPSIS THALIANA HOMEOBOX GENE 1); DNA binding / sequence-specific DNA binding / transcription factor | chr4:15914865-15916873 REVERSE protein|homeobox domain containing protein, expressed	-9.21579
27.3.22	RNA.regulation of transcription.HB,Homeobox transcription factor family	i1_HQ_LWC_c37233/f4p26/1178	Transcript	weakly similar to ( 114) AT2G46680 | Symbols: ATHB-7, ATHB7 | ATHB-7 (ARABIDOPSIS THALIANA HOMEOBOX 7); transcription activator/ transcription factor | chr2:19165777-19166773 REVERSE protein|homeobox associated leucine zipper, putative, expressed	9.95828
27.3.22	RNA.regulation of transcription.HB,Homeobox transcription factor family	i1_LQ_LWC_c11111/f1p0/1501	Transcript	moderately similar to ( 279) AT4G08150 | Symbols: KNAT1, BP, BP1 | KNAT1 (KNOTTED-LIKE FROM ARABIDOPSIS THALIANA); transcription factor | chr4:5147969-5150610 REVERSEmoderately similar to ( 496) OSH1_ORYSA Homeobox protein OSH1 - Oryza sativa (Rice) KNOX2 protein|Homeobox domain containing protein, expressed	-9.55822
27.3.22	RNA.regulation of transcription.HB,Homeobox transcription factor family	i1_HQ_LWC_c11899/f2p0/1671	Transcript	weakly similar to ( 144) AT3G01470 | Symbols: ATHB-1, ATHB1, HD-ZIP-1, HAT5 | ATHB-1 (ARABIDOPSIS THALIANA HOMEOBOX 1); DNA binding / protein homodimerization/ sequence-specific DNA binding / transcription activator/ transcription factor | chr3:182648-184034 REVERSE protein|CPuORF27 - conserved peptide uORF-containing transcript, expressed	4.26866
27.3.22	RNA.regulation of transcription.HB,Homeobox transcription factor family	i1_LQ_LWC_c10990/f2p4/1564	Transcript	weakly similar to ( 106) AT5G15150 | Symbols: ATHB-3, HAT7, ATHB3 | ATHB-3 (ARABIDOPSIS THALIANA HOMEOBOX 3); DNA binding / sequence-specific DNA binding / transcription factor | chr5:4913951-4915609 REVERSE protein|homeobox associated leucine zipper, putative, expressed	12.2879
27.3.22	RNA.regulation of transcription.HB,Homeobox transcription factor family	i2_LQ_LWC_c107392/f1p12/2977	Transcript	nearly identical (1018) AT4G04890 | Symbols: PDF2 | PDF2 (PROTODERMAL FACTOR 2); DNA binding / transcription factor | chr4:2476970-2480090 REVERSESTART START START Homeobox protein|homeobox and START domains containing protein, putative, expressed	-10.2758
27.3.23	RNA.regulation of transcription.HSF,Heat-shock transcription factor family	i1_HQ_LWC_c21251/f3p3/1745	Transcript	moderately similar to ( 210) AT5G16820 | Symbols: HSF3, HSFA1B, ATHSFA1B | HSF3 (HEAT SHOCK FACTOR 3); DNA binding / transcription factor | chr5:5530446-5532497 FORWARD HSF_DNA-bind HSF HSF1 protein|HSF-type DNA-binding domain containing protein, expressed	2.65663
27.3.23	RNA.regulation of transcription.HSF,Heat-shock transcription factor family	i2_LQ_LWC_c4082/f1p0/2693	Transcript	moderately similar to ( 213) AT5G03720 | Symbols: AT-HSFA3, HSFA3 | AT-HSFA3; DNA binding / transcription factor | chr5:971913-973683 REVERSE HSF_DNA-bind HSF HSF1 protein|HSF-type DNA-binding domain containing protein, expressed	2.07174
27.3.23	RNA.regulation of transcription.HSF,Heat-shock transcription factor family	i2_LQ_LWC_c90147/f1p0/2328	Transcript	weakly similar to ( 190) AT3G22830 | Symbols: AT-HSFA6B, HSFA6B | AT-HSFA6B; DNA binding / transcription factor | chr3:8078981-8080895 FORWARD protein|heat stress transcription factor, putative, expressed	2.11488
27.3.23	RNA.regulation of transcription.HSF,Heat-shock transcription factor family	i1_LQ_LWC_c18736/f1p1/1715	Transcript	weakly similar to ( 192) AT1G46264 | Symbols: AT-HSFB4, HSFB4 | AT-HSFB4; DNA binding / transcription factor | chr1:17224904-17226183 FORWARD HSF_DNA-bind HSF HSF1 protein|HSF-type DNA-binding domain containing protein, expressed	7.54908
27.3.23	RNA.regulation of transcription.HSF,Heat-shock transcription factor family	i1_HQ_LWC_c6023/f3p0/1761	Transcript	moderately similar to ( 237) AT5G45710 | Symbols: AT-HSFA4C, RHA1, HSFA4C | RHA1 (ROOT HANDEDNESS 1); DNA binding / transcription factor | chr5:18541576-18542706 FORWARD HSF_DNA-bind HSF HSF1 protein|HSF-type DNA-binding domain containing protein, expressed	11.4132
27.3.24	RNA.regulation of transcription.MADS box transcription factor family	i2_LQ_LWC_c85666/f1p1/2171	Transcript	weakly similar to ( 125) AT5G23260 | Symbols: TT16, ABS | TT16 (TRANSPARENT TESTA16); transcription factor | chr5:7836442-7838340 FORWARDmoderately similar to ( 278) MAD31_ORYSA MADS-box transcription factor 31 (OsMADS31) - Oryza sativa (Rice) MADS_MEF2_like MADS MADS MADS_SRF_like SRF-TF protein|OsMADS31 - MADS-box family gene with MIKCc type-box, expressed	6.20966
27.3.24	RNA.regulation of transcription.MADS box transcription factor family	i1_LQ_LWC_c38613/f1p0/1374	Transcript	weakly similar to ( 145) MAD15_ORYSA MADS-box transcription factor 15 (OsMADS15) (Protein APETALA1-like A) (FDRMADS3) (RMADS215) - Oryza sativa (Rice) protein|OsMADS15 - MADS-box family gene with MIKCc type-box, expressed	-2.15817
27.3.24	RNA.regulation of transcription.MADS box transcription factor family	i1_LQ_LWC_c25741/f2p2/1239	Transcript	moderately similar to ( 266) AT2G45650 | Symbols: AGL6 | AGL6 (AGAMOUS-LIKE 6); DNA binding / transcription factor | chr2:18804453-18806291 FORWARDmoderately similar to ( 457) MADS6_ORYSA MADS-box transcription factor 6 (OsMADS6) - Oryza sativa (Rice) MADS_MEF2_like MADS K-box MADS MADS_SRF_like SRF-TF protein|OsMADS6 - MADS-box family gene with MIKCc type-box, expressed	0
27.3.24	RNA.regulation of transcription.MADS box transcription factor family	i1_LQ_LWC_c38425/f1p0/1194	Transcript	moderately similar to ( 206) AT5G60910 | Symbols: AGL8, FUL | AGL8 (agamous-like 8); transcription factor | chr5:24502736-24504934 REVERSEmoderately similar to ( 403) MAD18_ORYSA MADS-box transcription factor 18 (OsMADS18) (MADS-box protein 2) (OsMADS2) (MADS-box protein 28) (OsMADS28) (FDRMADS7) - Oryza sativa (Rice) MADS_MEF2_like MADS MADS K-box MADS_SRF_like SRF-TF protein|OsMADS18 - MADS-box…	2.40233
27.3.24	RNA.regulation of transcription.MADS box transcription factor family	i1_LQ_LWC_c20721/f1p0/1680	Transcript	weakly similar to ( 154) AT1G22130 | Symbols: AGL104 | AGL104 (AGAMOUS-LIKE 104); DNA binding / transcription factor | chr1:7812387-7814259 REVERSEvery weakly similar to (97.1) MAD13_ORYSA MADS-box transcription factor 13 (OsMADS13) (RMADS206) - Oryza sativa (Rice) MADS_MEF2_like MADS MADS_SRF_like MADS SRF-TF protein|OsMADS62 - MADS-box family gene with MIKC* type-box, expressed	0
27.3.24	RNA.regulation of transcription.MADS box transcription factor family	i1_HQ_LWC_c13491/f5p0/1603	Transcript	moderately similar to ( 207) AT1G69120 | Symbols: AP1, AGL7 | AP1 (APETALA1); DNA binding / protein binding / protein heterodimerization/ transcription activator/ transcription factor | chr1:25982576-25986102 REVERSEmoderately similar to ( 365) MAD14_ORYSA MADS-box transcription factor 14 (OsMADS14) (Protein APETALA1-like B) (Protein AGAMOUS-like 10) (FDRMADS6) (RMADS211) - Oryza sativa (Rice) MA…	5.95764
27.3.24	RNA.regulation of transcription.MADS box transcription factor family	i1_LQ_LWC_c13479/f1p0/1311	Transcript	moderately similar to ( 236) AT4G18960 | Symbols: AG | AG (AGAMOUS); DNA binding / transcription factor | chr4:10383917-10388272 FORWARDmoderately similar to ( 427) MAD58_ORYSA MADS-box transcription factor 58 (OsMADS58) - Oryza sativa (Rice) MADS_MEF2_like K-box MADS MADS MADS_SRF_like SRF-TF protein|OsMADS58 - MADS-box family gene with MIKCc type-box, expressed	-8.73857
27.3.24	RNA.regulation of transcription.MADS box transcription factor family	i1_LQ_LWC_c38089/f1p0/1222	Transcript	weakly similar to ( 183) AT2G22540 | Symbols: SVP, AGL22 | SVP (SHORT VEGETATIVE PHASE); transcription factor/ translation repressor, nucleic acid binding | chr2:9580417-9583603 FORWARDmoderately similar to ( 341) MAD22_ORYSA MADS-box transcription factor 22 (OsMADS22) - Oryza sativa (Rice) MADS_MEF2_like MADS MADS MADS_SRF_like protein|OsMADS22 - MADS-box family gene with MIKCc type-box, express…	6.98054
27.3.24	RNA.regulation of transcription.MADS box transcription factor family	i2_LQ_LWC_c52513/f1p0/2119	Transcript	very weakly similar to (95.1) AT2G03710 | Symbols: SEP4, AGL3 | SEP4 (SEPALLATA 4); DNA binding / transcription factor | chr2:1129622-1131242 FORWARDvery weakly similar to (92.0) MADS7_ORYSA MADS-box transcription factor 7 (OsMADS7) (Protein AGAMOUS-like 6) (MADS-box protein 45) (OsMADS45) (FDRMADS1) (RMADS216) - Oryza sativa (Rice) MADS_MEF2_like MADS MADS MADS_SRF_like protein|OsMADS37 - MADS-b…	-4.35033
27.3.24	RNA.regulation of transcription.MADS box transcription factor family	i2_LQ_LWC_c19264/f1p0/2346	Transcript	very weakly similar to (85.1) AT5G60910 | Symbols: AGL8, FUL | AGL8 (agamous-like 8); transcription factor | chr5:24502736-24504934 REVERSEmoderately similar to ( 344) MAD32_ORYSA MADS-box transcription factor 32 (OsMADS32) - Oryza sativa (Rice) MADS_MEF2_like MADS MADS protein|OsMADS32 - MADS-box family gene with MIKCc type-box, expressed	6.20988
27.3.24	RNA.regulation of transcription.MADS box transcription factor family	i5_LQ_LWC_c3462/f1p1/5719	Transcript	weakly similar to ( 162) AT4G11880 | Symbols: AGL14 | AGL14 (agamous-like 14); DNA binding / transcription factor | chr4:7143512-7147108 FORWARDmoderately similar to ( 256) MAD56_ORYSA MADS-box transcription factor 56 (OsMADS56) (FDRMADS8) (RMADS214) - Oryza sativa (Rice) MADS_MEF2_like MADS MADS MADS_SRF_like SRF-TF protein|OsMADS56 - MADS-box family gene with MIKCc type-box, expressed	3.42543
27.3.24	RNA.regulation of transcription.MADS box transcription factor family	i1_LQ_LWC_c13925/f1p0/1120	Transcript	weakly similar to ( 107) AT4G11880 | Symbols: AGL14 | AGL14 (agamous-like 14); DNA binding / transcription factor | chr4:7143512-7147108 FORWARDweakly similar to ( 112) MAD50_ORYSA MADS-box transcription factor 50 (OsMADS50) (Protein SUPPRESSOR OF CONSTANS OVEREXPRESSION 1-like) (OsSOC1) (Protein AGAMOUS-like 20) (RMADS208) - Oryza sativa (Rice) MADS_MEF2_like MADS MADS MADS_SRF_like SRF-TF prote…	-1.36816
27.3.24	RNA.regulation of transcription.MADS box transcription factor family	i5_LQ_LWC_c9768/f1p12/5708	Transcript	moderately similar to ( 248) AT2G45650 | Symbols: AGL6 | AGL6 (AGAMOUS-LIKE 6); DNA binding / transcription factor | chr2:18804453-18806291 FORWARDmoderately similar to ( 452) MAD17_ORYSA MADS-box transcription factor 17 (OsMADS17) (NMADS3) (RMADS213) - Oryza sativa (Rice) MADS_MEF2_like MADS K-box MADS MADS_SRF_like SRF-TF protein|OsMADS17 - MADS-box family gene with MIKCc type-box, expressed	6.46968
27.3.24	RNA.regulation of transcription.MADS box transcription factor family	i4_LQ_LWC_c32900/f1p0/4180	Transcript	moderately similar to ( 206) AT3G02310 | Symbols: SEP2, AGL4 | SEP2 (SEPALLATA 2); DNA binding / protein binding / transcription factor | chr3:464554-466687 REVERSEmoderately similar to ( 401) MADS5_ORYSA MADS-box transcription factor 5 (OsMADS5) (FDRMADS2) - Oryza sativa (Rice) MADS_MEF2_like MADS MADS MADS_SRF_like K-box SRF-TF protein|OsMADS5 - MADS-box family gene with MIKCc type-box, express…	-9.93154
27.3.24	RNA.regulation of transcription.MADS box transcription factor family	i1_LQ_LWC_c26705/f1p0/1115	Transcript	moderately similar to ( 247) AT1G24260 | Symbols: SEP3, AGL9 | SEP3 (SEPALLATA3); DNA binding / protein binding / transcription factor | chr1:8593790-8595862 REVERSEmoderately similar to ( 466) MADS7_ORYSA MADS-box transcription factor 7 (OsMADS7) (Protein AGAMOUS-like 6) (MADS-box protein 45) (OsMADS45) (FDRMADS1) (RMADS216) - Oryza sativa (Rice) MADS_MEF2_like MADS MADS K-box MADS_SRF_like SRF-…	0
27.3.24	RNA.regulation of transcription.MADS box transcription factor family	i1_HQ_LWC_c25811/f2p0/1210	Transcript	weakly similar to ( 172) AT2G22540 | Symbols: SVP, AGL22 | SVP (SHORT VEGETATIVE PHASE); transcription factor/ translation repressor, nucleic acid binding | chr2:9580417-9583603 FORWARDmoderately similar to ( 325) MAD47_ORYSA MADS-box transcription factor 47 (OsMADS47) - Oryza sativa (Rice) MADS_MEF2_like MADS MADS MADS_SRF_like protein|OsMADS47 - MADS-box family gene with MIKCc type-box, express…	5.35058
27.3.24	RNA.regulation of transcription.MADS box transcription factor family	i1_LQ_LWC_c26252/f1p0/1217	Transcript	moderately similar to ( 249) AT1G24260 | Symbols: SEP3, AGL9 | SEP3 (SEPALLATA3); DNA binding / protein binding / transcription factor | chr1:8593790-8595862 REVERSEmoderately similar to ( 469) MADS8_ORYSA MADS-box transcription factor 8 (OsMADS8) (MADS-box protein 24) (OsMADS24) - Oryza sativa (Rice) MADS_MEF2_like MADS MADS K-box MADS_SRF_like SRF-TF protein|OsMADS8 - MADS-box family gene with …	-10.3256
27.3.25	RNA.regulation of transcription.MYB domain transcription factor family	i4_LQ_LWC_c26181/f1p6/5043	Transcript	moderately similar to ( 365) AT1G03510 | Symbols: | pentatricopeptide (PPR) repeat-containing protein | chr1:876258-877547 REVERSE protein|pentatricopeptide, putative, expressed	0
27.3.25	RNA.regulation of transcription.MYB domain transcription factor family	i1_LQ_LWC_c38422/f1p0/1085	Transcript	moderately similar to ( 221) AT5G57620 | Symbols: MYB36, AtMYB36 | MYB36 (myb domain protein 36); DNA binding / transcription factor | chr5:23334904-23336388 FORWARDweakly similar to ( 152) MYB4_ORYSA Myb-related protein Myb4 (OsMyb4) (Transcription factor RLTR1) - Oryza sativa (Rice) protein|MYB family transcription factor, putative, expressed	0
27.3.25	RNA.regulation of transcription.MYB domain transcription factor family	i3_LQ_LWC_c39049/f1p9/3029	Transcript	highly similar to ( 627) AT4G16835 | Symbols: | pentatricopeptide (PPR) repeat-containing protein | chr4:9473021-9474803 FORWARDvery weakly similar to (96.7) RF1_ORYSA Rf1 protein, mitochondrial precursor (PPR protein) (Fertility restorer) (Restorer for CMS) - Oryza sativa (Rice) protein|pentatricopeptide, putative, expressed	8.04872
27.3.25	RNA.regulation of transcription.MYB domain transcription factor family	i3_LQ_LWC_c27894/f1p0/3413	Transcript	highly similar to ( 520) AT2G22070 | Symbols: | pentatricopeptide (PPR) repeat-containing protein | chr2:9383602-9385962 FORWARDweakly similar to ( 122) RF1_ORYSA Rf1 protein, mitochondrial precursor (PPR protein) (Fertility restorer) (Restorer for CMS) - Oryza sativa (Rice) protein|pentatricopeptide repeat protein PPR868-14, putative, expressed	8.03536
27.3.25	RNA.regulation of transcription.MYB domain transcription factor family	i1_HQ_LWC_c39812/f6p1/1878	Transcript	moderately similar to ( 212) AT2G32460 | Symbols: MYB101, ATMYB101, ATM1 | MYB101; DNA binding / transcription factor | chr2:13782419-13784359 REVERSEmoderately similar to ( 202) GAM1_ORYSA Transcription factor GAMYB (OsGAMyb) - Oryza sativa (Rice) protein|MYB family transcription factor, putative, expressed	-7.14229
27.3.25	RNA.regulation of transcription.MYB domain transcription factor family	i2_HQ_LWC_c37877/f2p2/2250	Transcript	highly similar to ( 695) AT3G24000 | Symbols: | INVOLVED IN: biological_process unknown; EXPRESSED IN: shoot apex, carpel; EXPRESSED DURING: petal differentiation and expansion stage; CONTAINS InterPro DOMAIN/s: Pentatricopeptide repeat (InterPro:IPR002885); BEST Arabidopsis thaliana protein match is: pentatricopeptide (PPR) repeat-containing protein (TAIR:AT3G23330.1); Has 15874 Blast hits to 53…	4.63205
27.3.25	RNA.regulation of transcription.MYB domain transcription factor family	i2_HQ_LWC_c35782/f2p0/2619	Transcript	highly similar to ( 591) AT3G13880 | Symbols: | pentatricopeptide (PPR) repeat-containing protein | chr3:4572180-4574426 FORWARDvery weakly similar to (92.8) RF1_ORYSA Rf1 protein, mitochondrial precursor (PPR protein) (Fertility restorer) (Restorer for CMS) - Oryza sativa (Rice) protein|pentatricopeptide, putative, expressed	8.75163
27.3.25	RNA.regulation of transcription.MYB domain transcription factor family	i1_HQ_LWC_c8829/f2p0/1588	Transcript	moderately similar to ( 437) AT1G05750 | Symbols: PDE247, CLB19 | PDE247 (pigment defective 247) | chr1:1721523-1723025 FORWARDvery weakly similar to (99.4) RF1_ORYSA Rf1 protein, mitochondrial precursor (PPR protein) (Fertility restorer) (Restorer for CMS) - Oryza sativa (Rice) protein|tetratricopeptide-like helical, putative, expressed	7.42903
27.3.25	RNA.regulation of transcription.MYB domain transcription factor family	i2_LQ_LWC_c13982/f1p0/2089	Transcript	moderately similar to ( 347) AT4G14170 | Symbols: | pentatricopeptide (PPR) repeat-containing protein | chr4:8176709-8178085 REVERSEvery weakly similar to (89.7) RF1_ORYSA Rf1 protein, mitochondrial precursor (PPR protein) (Fertility restorer) (Restorer for CMS) - Oryza sativa (Rice) protein|pentatricopeptide, putative, expressed	0
27.3.25	RNA.regulation of transcription.MYB domain transcription factor family	i4_LQ_LWC_c2493/f1p2/4994	Transcript	moderately similar to ( 274) AT4G21065 | Symbols: | FUNCTIONS IN: molecular_function unknown; INVOLVED IN: biological_process unknown; CONTAINS InterPro DOMAIN/s: Pentatricopeptide repeat (InterPro:IPR002885); BEST Arabidopsis thaliana protein match is: pentatricopeptide (PPR) repeat-containing protein (TAIR:AT4G33170.1); Has 16184 Blast hits to 5257 proteins in 175 species: Archae - 0; Bacteria …	0
27.3.25	RNA.regulation of transcription.MYB domain transcription factor family	i2_LQ_LWC_c83980/f1p0/2409	Transcript	highly similar to ( 655) AT3G08820 | Symbols: | pentatricopeptide (PPR) repeat-containing protein | chr3:2677122-2679179 REVERSEvery weakly similar to (81.6) RF1_ORYSA Rf1 protein, mitochondrial precursor (PPR protein) (Fertility restorer) (Restorer for CMS) - Oryza sativa (Rice) protein|pentatricopeptide, putative, expressed	-4.44338
27.3.25	RNA.regulation of transcription.MYB domain transcription factor family	i3_LQ_LWC_c7771/f1p0/3191	Transcript	highly similar to ( 991) AT5G09950 | Symbols: | pentatricopeptide (PPR) repeat-containing protein | chr5:3102877-3105864 REVERSEweakly similar to ( 106) RF1_ORYSA Rf1 protein, mitochondrial precursor (PPR protein) (Fertility restorer) (Restorer for CMS) - Oryza sativa (Rice) protein|pentatricopeptide, putative, expressed	7.39528
27.3.25	RNA.regulation of transcription.MYB domain transcription factor family	i4_LQ_LWC_c29490/f1p0/4479	Transcript	highly similar to ( 835) AT4G18750 | Symbols: DOT4 | DOT4 (DEFECTIVELY ORGANIZED TRIBUTARIES 4) | chr4:10304850-10307465 FORWARDweakly similar to ( 109) RF1_ORYSA Rf1 protein, mitochondrial precursor (PPR protein) (Fertility restorer) (Restorer for CMS) - Oryza sativa (Rice) protein|pentatricopeptide, putative, expressed	0
27.3.25	RNA.regulation of transcription.MYB domain transcription factor family	i5_LQ_LWC_c10242/f1p0/5058	Transcript	moderately similar to ( 406) AT4G02750 | Symbols: | pentatricopeptide (PPR) repeat-containing protein | chr4:1221116-1223461 REVERSEweakly similar to ( 120) RF1_ORYSA Rf1 protein, mitochondrial precursor (PPR protein) (Fertility restorer) (Restorer for CMS) - Oryza sativa (Rice) protein|pentatricopeptide, putative, expressed	8.47838
27.3.25	RNA.regulation of transcription.MYB domain transcription factor family	i1_LQ_LWC_c13728/f1p0/1172	Transcript	weakly similar to ( 110) AT5G59780 | Symbols: MYB59, ATMYB59-2 | MYB59 (MYB DOMAIN PROTEIN 59); DNA binding / transcription factor | chr5:24082425-24083255 REVERSEmoderately similar to ( 334) MYBA1_ORYSA Myb-related protein MYBAS1 - Oryza sativa (Rice) protein|MYB family transcription factor, putative, expressed	13.5609
27.3.25	RNA.regulation of transcription.MYB domain transcription factor family	i3_LQ_LWC_c27376/f1p0/4012	Transcript	highly similar to ( 942) AT4G02750 | Symbols: | pentatricopeptide (PPR) repeat-containing protein | chr4:1221116-1223461 REVERSEvery weakly similar to (92.8) RF1_ORYSA Rf1 protein, mitochondrial precursor (PPR protein) (Fertility restorer) (Restorer for CMS) - Oryza sativa (Rice) protein|tetratricopeptide-like helical, putative, expressed	6.56787
27.3.25	RNA.regulation of transcription.MYB domain transcription factor family	i2_LQ_LWC_c34699/f1p0/2128	Transcript	highly similar to ( 536) AT1G59720 | Symbols: CRR28 | CRR28 (CHLORORESPIRATORY REDUCTION28); endonuclease | chr1:21939868-21941784 REVERSE protein|pentatricopeptide, putative, expressed	-2.12211
27.3.25	RNA.regulation of transcription.MYB domain transcription factor family	i3_LQ_LWC_c31298/f1p4/3049	Transcript	moderately similar to ( 322) AT4G18750 | Symbols: DOT4 | DOT4 (DEFECTIVELY ORGANIZED TRIBUTARIES 4) | chr4:10304850-10307465 FORWARDvery weakly similar to (85.1) RF1_ORYSA Rf1 protein, mitochondrial precursor (PPR protein) (Fertility restorer) (Restorer for CMS) - Oryza sativa (Rice) protein|pentatricopeptide, putative, expressed	8.13516
27.3.25	RNA.regulation of transcription.MYB domain transcription factor family	i5_LQ_LWC_c9554/f1p30/5719	Transcript	highly similar to ( 536) AT2G37310 | Symbols: | pentatricopeptide (PPR) repeat-containing protein | chr2:15665102-15667075 REVERSEweakly similar to ( 114) RF1_ORYSA Rf1 protein, mitochondrial precursor (PPR protein) (Fertility restorer) (Restorer for CMS) - Oryza sativa (Rice) protein|pentatricopeptide, putative, expressed	7.45465
27.3.25	RNA.regulation of transcription.MYB domain transcription factor family	i1_HQ_LWC_c18252/f2p0/1804	Transcript	weakly similar to ( 186) AT2G32460 | Symbols: MYB101, ATMYB101, ATM1 | MYB101; DNA binding / transcription factor | chr2:13782419-13784359 REVERSEweakly similar to ( 183) GAM1_ORYSA Transcription factor GAMYB (OsGAMyb) - Oryza sativa (Rice) protein|myb-like DNA-binding domain containing protein, expressed	-9.77663
27.3.25	RNA.regulation of transcription.MYB domain transcription factor family	i2_LQ_LWC_c7321/f1p0/2476	Transcript	moderately similar to ( 206) AT5G08510 | Symbols: | pentatricopeptide (PPR) repeat-containing protein | chr5:2753099-2754731 FORWARD protein|pentatricopeptide, putative, expressed	7.15878
27.3.25	RNA.regulation of transcription.MYB domain transcription factor family	i3_LQ_LWC_c21361/f1p8/3289	Transcript	moderately similar to ( 449) AT2G22410 | Symbols: | pentatricopeptide (PPR) repeat-containing protein | chr2:9509035-9511080 FORWARDweakly similar to ( 117) RF1_ORYSA Rf1 protein, mitochondrial precursor (PPR protein) (Fertility restorer) (Restorer for CMS) - Oryza sativa (Rice) protein|pentatricopeptide, putative, expressed	-2.52547
27.3.25	RNA.regulation of transcription.MYB domain transcription factor family	i3_HQ_LWC_c17974/f2p0/3175	Transcript	highly similar to ( 912) AT1G15510 | Symbols: | pentatricopeptide (PPR) repeat-containing protein | chr1:5329111-5331711 FORWARDweakly similar to ( 103) RF1_ORYSA Rf1 protein, mitochondrial precursor (PPR protein) (Fertility restorer) (Restorer for CMS) - Oryza sativa (Rice) protein|pentatricopeptide, putative, expressed	0
27.3.25	RNA.regulation of transcription.MYB domain transcription factor family	i2_LQ_LWC_c25110/f1p0/2403	Transcript	highly similar to ( 660) AT3G46790 | Symbols: CRR2 | CRR2 (CHLORORESPIRATORY REDUCTION 2) | chr3:17231975-17233948 REVERSEvery weakly similar to (95.1) RF1_ORYSA Rf1 protein, mitochondrial precursor (PPR protein) (Fertility restorer) (Restorer for CMS) - Oryza sativa (Rice) protein|CRR2, putative, expressed	-1.9562
27.3.25	RNA.regulation of transcription.MYB domain transcription factor family	i3_LQ_LWC_c26189/f1p7/3822	Transcript	highly similar to ( 737) AT3G63370 | Symbols: | pentatricopeptide (PPR) repeat-containing protein | chr3:23402080-23405991 FORWARDvery weakly similar to (82.4) RF1_ORYSA Rf1 protein, mitochondrial precursor (PPR protein) (Fertility restorer) (Restorer for CMS) - Oryza sativa (Rice) protein|pentatricopeptide, putative, expressed	0
27.3.25	RNA.regulation of transcription.MYB domain transcription factor family	i3_LQ_LWC_c19229/f1p5/3166	Transcript	highly similar to ( 561) AT1G77010 | Symbols: | pentatricopeptide (PPR) repeat-containing protein | chr1:28942710-28944797 FORWARDvery weakly similar to ( 100) RF1_ORYSA Rf1 protein, mitochondrial precursor (PPR protein) (Fertility restorer) (Restorer for CMS) - Oryza sativa (Rice) protein|pentatricopeptide, putative, expressed	8.22489
27.3.25	RNA.regulation of transcription.MYB domain transcription factor family	i2_LQ_LWC_c24214/f1p1/2318	Transcript	moderately similar to ( 496) AT4G02750 | Symbols: | pentatricopeptide (PPR) repeat-containing protein | chr4:1221116-1223461 REVERSEweakly similar to ( 152) RF1_ORYSA Rf1 protein, mitochondrial precursor (PPR protein) (Fertility restorer) (Restorer for CMS) - Oryza sativa (Rice) protein|tetratricopeptide-like helical, putative, expressed	-2.86572
27.3.25	RNA.regulation of transcription.MYB domain transcription factor family	i2_LQ_LWC_c103378/f1p0/2509	Transcript	moderately similar to ( 427) AT4G14820 | Symbols: | pentatricopeptide (PPR) repeat-containing protein | chr4:8507794-8510038 REVERSE protein|pentatricopeptide, putative, expressed	-5.40875
27.3.25	RNA.regulation of transcription.MYB domain transcription factor family	i1_LQ_LWC_c14071/f1p25/1252	Transcript	moderately similar to ( 261) AT3G28910 | Symbols: ATMYB30, MYB30 | MYB30 (MYB DOMAIN PROTEIN 30); DNA binding / transcription factor | chr3:10911443-10912856 FORWARDweakly similar to ( 182) MYB4_ORYSA Myb-related protein Myb4 (OsMyb4) (Transcription factor RLTR1) - Oryza sativa (Rice) REB1 protein|MYB family transcription factor, putative, expressed	0
27.3.25	RNA.regulation of transcription.MYB domain transcription factor family	i1_HQ_LWC_c10879/f2p0/2006	Transcript	highly similar to ( 679) AT2G02980 | Symbols: | pentatricopeptide (PPR) repeat-containing protein | chr2:868468-870279 FORWARDvery weakly similar to (91.7) RF1_ORYSA Rf1 protein, mitochondrial precursor (PPR protein) (Fertility restorer) (Restorer for CMS) - Oryza sativa (Rice) protein|pentatricopeptide, putative, expressed	8.44822
27.3.25	RNA.regulation of transcription.MYB domain transcription factor family	i1_LQ_LWC_c34421/f1p6/1943	Transcript	highly similar to ( 757) AT4G30700 | Symbols: | pentatricopeptide (PPR) repeat-containing protein | chr4:14962617-14964995 REVERSEweakly similar to ( 102) RF1_ORYSA Rf1 protein, mitochondrial precursor (PPR protein) (Fertility restorer) (Restorer for CMS) - Oryza sativa (Rice) protein|pentatricopeptide, putative, expressed	-2.05281
27.3.25	RNA.regulation of transcription.MYB domain transcription factor family	i2_LQ_LWC_c87035/f1p1/2610	Transcript	moderately similar to ( 317) AT1G16480 | Symbols: | FUNCTIONS IN: molecular_function unknown; INVOLVED IN: biological_process unknown; LOCATED IN: cellular_component unknown; EXPRESSED IN: shoot apex; CONTAINS InterPro DOMAIN/s: Pentatricopeptide repeat (InterPro:IPR002885); BEST Arabidopsis thaliana protein match is: pentatricopeptide (PPR) repeat-containing protein (TAIR:AT4G13650.1). | chr1:56…	-8.20434
27.3.25	RNA.regulation of transcription.MYB domain transcription factor family	i3_LQ_LWC_c35726/f1p0/3608	Transcript	moderately similar to ( 211) AT4G13650 | Symbols: | pentatricopeptide (PPR) repeat-containing protein | chr4:7939611-7942898 REVERSE protein|pentatricopeptide repeat-containing protein, putative, expressed	2.39037
27.3.25	RNA.regulation of transcription.MYB domain transcription factor family	i12_LQ_LWC_c3/f1p0/12284	Transcript	highly similar to ( 933) AT5G16860 | Symbols: | pentatricopeptide (PPR) repeat-containing protein | chr5:5543834-5546386 FORWARDweakly similar to ( 108) RF1_ORYSA Rf1 protein, mitochondrial precursor (PPR protein) (Fertility restorer) (Restorer for CMS) - Oryza sativa (Rice) protein|pentatricopeptide, putative, expressed	0
27.3.25	RNA.regulation of transcription.MYB domain transcription factor family	i1_LQ_LWC_c17727/f1p2/1878	Transcript	highly similar to ( 830) AT1G11290 | Symbols: CRR22 | CRR22 (CHLORORESPIRATORY REDUCTION22); endonuclease | chr1:3791454-3793883 REVERSEvery weakly similar to (87.4) RF1_ORYSA Rf1 protein, mitochondrial precursor (PPR protein) (Fertility restorer) (Restorer for CMS) - Oryza sativa (Rice) protein|pentatricopeptide, putative, expressed	-6.28372
27.3.25	RNA.regulation of transcription.MYB domain transcription factor family	i3_LQ_LWC_c19845/f1p20/4015	Transcript	very weakly similar to (87.0) AT3G47680 | Symbols: | DNA binding | chr3:17577483-17578391 REVERSE protein|transposon protein, putative, Pong sub-class, expressed	2.32458
27.3.25	RNA.regulation of transcription.MYB domain transcription factor family	i1_LQ_LWC_c18357/f1p0/1497	Transcript	moderately similar to ( 236) AT3G13890 | Symbols: MYB26 | ATMYB26 (MYB DOMAIN PROTEIN 26); DNA binding / transcription factor | chr3:4576744-4578027 REVERSEweakly similar to ( 191) MYB3_HORVU Myb-related protein Hv33 - Hordeum vulgare (Barley) REB1 protein|MYB family transcription factor, putative, expressed	7.58208
27.3.25	RNA.regulation of transcription.MYB domain transcription factor family	i3_LQ_LWC_c27134/f1p0/3439	Transcript	highly similar to ( 511) AT5G19020 | Symbols: | pentatricopeptide (PPR) repeat-containing protein | chr5:6352771-6357083 REVERSEweakly similar to ( 110) RF1_ORYSA Rf1 protein, mitochondrial precursor (PPR protein) (Fertility restorer) (Restorer for CMS) - Oryza sativa (Rice) protein|tetratricopeptide-like helical, putative, expressed	8.57072
27.3.25	RNA.regulation of transcription.MYB domain transcription factor family	i1_LQ_LWC_c26246/f1p0/1138	Transcript	moderately similar to ( 226) AT3G23250 | Symbols: MYB15, ATY19, ATMYB15 | MYB15 (MYB DOMAIN PROTEIN 15); DNA binding / transcription factor | chr3:8309742-8310624 FORWARDmoderately similar to ( 259) MYB4_ORYSA Myb-related protein Myb4 (OsMyb4) (Transcription factor RLTR1) - Oryza sativa (Rice) protein|MYB family transcription factor, putative, expressed	4.1995
27.3.25	RNA.regulation of transcription.MYB domain transcription factor family	i2_LQ_LWC_c74632/f1p0/2047	Transcript	highly similar to ( 622) AT4G37170 | Symbols: | pentatricopeptide (PPR) repeat-containing protein | chr4:17498580-17500655 REVERSEvery weakly similar to (84.3) RF1_ORYSA Rf1 protein, mitochondrial precursor (PPR protein) (Fertility restorer) (Restorer for CMS) - Oryza sativa (Rice) protein|pentatricopeptide, putative, expressed	6.44109
27.3.25	RNA.regulation of transcription.MYB domain transcription factor family	i2_LQ_LWC_c6545/f1p1/2865	Transcript	highly similar to ( 677) AT5G03800 | Symbols: EMB175, emb1899, EMB166 | EMB175 (EMBRYO DEFECTIVE 175); catalytic | chr5:1010894-1013584 REVERSE protein|pentatricopeptide, putative, expressed	0
27.3.25	RNA.regulation of transcription.MYB domain transcription factor family	i1_LQ_LWC_c4587/f1p0/1559	Transcript	moderately similar to ( 202) AT5G67300 | Symbols: ATMYBR1, ATMYB44, MYBR1 | MYBR1 (MYB DOMAIN PROTEIN R1); DNA binding / transcription factor | chr5:26854109-26855026 FORWARDweakly similar to ( 117) MYB4_ORYSA Myb-related protein Myb4 (OsMyb4) (Transcription factor RLTR1) - Oryza sativa (Rice) REB1 protein|myb-like DNA-binding domain containing protein, putative, expressed	7.59236
27.3.25	RNA.regulation of transcription.MYB domain transcription factor family	i3_LQ_LWC_c3057/f1p0/3157	Transcript	highly similar to ( 511) AT1G33350 | Symbols: | pentatricopeptide (PPR) repeat-containing protein | chr1:12090071-12091687 REVERSEvery weakly similar to (87.4) RF1_ORYSA Rf1 protein, mitochondrial precursor (PPR protein) (Fertility restorer) (Restorer for CMS) - Oryza sativa (Rice) protein|pentatricopeptide domain containing protein, putative, expressed	0
27.3.25	RNA.regulation of transcription.MYB domain transcription factor family	i2_LQ_LWC_c106784/f1p0/2867	Transcript	moderately similar to ( 467) AT2G29760 | Symbols: | pentatricopeptide (PPR) repeat-containing protein | chr2:12712884-12715100 FORWARDvery weakly similar to (99.0) RF1_ORYSA Rf1 protein, mitochondrial precursor (PPR protein) (Fertility restorer) (Restorer for CMS) - Oryza sativa (Rice) protein|pentatricopeptide, putative, expressed	7.47425
27.3.25	RNA.regulation of transcription.MYB domain transcription factor family	i1_LQ_LWC_c23235/f1p0/1720	Transcript	moderately similar to ( 452) AT1G28690 | Symbols: | pentatricopeptide (PPR) repeat-containing protein | chr1:10080042-10081604 REVERSE protein|pentatricopeptide, putative, expressed	7.92158
27.3.25	RNA.regulation of transcription.MYB domain transcription factor family	i1_LQ_LWC_c34468/f1p0/1535	Transcript	moderately similar to ( 224) AT1G69560 | Symbols: MYB105, AtMYB105 | MYB105 (myb domain protein 105); DNA binding / transcription factor | chr1:26157755-26158906 FORWARDweakly similar to ( 102) GAM1_ORYSA Transcription factor GAMYB (OsGAMyb) - Oryza sativa (Rice) REB1 protein|MYB family transcription factor, putative, expressed	7.67082
27.3.25	RNA.regulation of transcription.MYB domain transcription factor family	i3_LQ_LWC_c13513/f1p0/3799	Transcript	weakly similar to ( 180) AT3G13540 | Symbols: ATMYB5 | ATMYB5 (MYB DOMAIN PROTEIN 5); DNA binding / transcription factor | chr3:4420239-4421443 FORWARDmoderately similar to ( 206) MYBC_MAIZE Anthocyanin regulatory C1 protein - Zea mays (Maize) protein|MYB family transcription factor, putative, expressed	-3.74144
27.3.25	RNA.regulation of transcription.MYB domain transcription factor family	i2_LQ_LWC_c17905/f1p2/2255	Transcript	moderately similar to ( 279) AT3G51320 | Symbols: | INVOLVED IN: biological_process unknown; EXPRESSED IN: 16 plant structures; EXPRESSED DURING: 6 growth stages; CONTAINS InterPro DOMAIN/s: Pentatricopeptide repeat (InterPro:IPR002885); BEST Arabidopsis thaliana protein match is: binding (TAIR:AT3G62890.1); Has 12158 Blast hits to 4373 proteins in 95 species: Archae - 0; Bacteria - 0; Metazoa - …	0
27.3.25	RNA.regulation of transcription.MYB domain transcription factor family	i3_LQ_LWC_c20076/f1p2/3977	Transcript	moderately similar to ( 404) AT3G18100 | Symbols: MYB4R1, AtMYB4R1 | MYB4R1 (myb domain protein 4R1); transcription factor | chr3:6200689-6204583 FORWARD protein|MYB family transcription factor, putative, expressed	7.33958
27.3.25	RNA.regulation of transcription.MYB domain transcription factor family	i2_LQ_LWC_c69726/f1p1/2646	Transcript	highly similar to ( 705) AT4G14850 | Symbols: LOI1 | LOI1 (lovastatin insensitive 1) | chr4:8513947-8516275 FORWARD protein|pentatricopeptide repeat domain containing protein, putative, expressed	8.25607
27.3.25	RNA.regulation of transcription.MYB domain transcription factor family	i1_LQ_LWC_c13192/f1p2/1349	Transcript	moderately similar to ( 254) AT4G12350 | Symbols: MYB42, AtMYB42 | MYB42 (myb domain protein 42); transcription factor | chr4:7324912-7326636 FORWARDmoderately similar to ( 271) ODO1_PETHY ODORANT1 protein (MYB-like protein ODO1) - Petunia hybrida (Petunia) protein|MYB family transcription factor, putative, expressed	1.36289
27.3.25	RNA.regulation of transcription.MYB domain transcription factor family	i2_LQ_LWC_c11463/f1p0/2428	Transcript	highly similar to ( 510) AT4G01030 | Symbols: | pentatricopeptide (PPR) repeat-containing protein | chr4:448336-449838 REVERSEweakly similar to ( 162) RF1_ORYSA Rf1 protein, mitochondrial precursor (PPR protein) (Fertility restorer) (Restorer for CMS) - Oryza sativa (Rice) protein|pentatricopeptide repeat protein PPR986-12, putative, expressed	5.94411
27.3.25	RNA.regulation of transcription.MYB domain transcription factor family	i1_HQ_LWC_c12727/f2p2/1645	Transcript	moderately similar to ( 207) AT5G59780 | Symbols: MYB59, ATMYB59-2 | MYB59 (MYB DOMAIN PROTEIN 59); DNA binding / transcription factor | chr5:24082425-24083255 REVERSEmoderately similar to ( 448) MYBA2_ORYSA Myb-related protein MYBAS2 - Oryza sativa (Rice) protein|MYB family transcription factor, putative, expressed	14.4344
27.3.25	RNA.regulation of transcription.MYB domain transcription factor family	i3_LQ_LWC_c23678/f1p2/3190	Transcript	highly similar to ( 657) AT3G15130 | Symbols: | pentatricopeptide (PPR) repeat-containing protein | chr3:5097153-5099222 REVERSEvery weakly similar to (87.0) RF1_ORYSA Rf1 protein, mitochondrial precursor (PPR protein) (Fertility restorer) (Restorer for CMS) - Oryza sativa (Rice) protein|pentatricopeptide, putative, expressed	6.99877
27.3.25	RNA.regulation of transcription.MYB domain transcription factor family	i2_LQ_LWC_c65590/f1p0/2119	Transcript	moderately similar to ( 225) AT3G62890 | Symbols: | binding | chr3:23246168-23247973 FORWARD protein|pentatricopeptide, putative, expressed	6.59037
27.3.25	RNA.regulation of transcription.MYB domain transcription factor family	i2_LQ_LWC_c114980/f1p1/2041	Transcript	moderately similar to ( 250) AT1G66230 | Symbols: MYB20, AtMYB20 | MYB20 (myb domain protein 20); DNA binding / transcription factor | chr1:24677322-24678246 FORWARDmoderately similar to ( 249) ODO1_PETHY ODORANT1 protein (MYB-like protein ODO1) - Petunia hybrida (Petunia) protein|ODORANT1, putative, expressed	4.21786
27.3.25	RNA.regulation of transcription.MYB domain transcription factor family	i3_LQ_LWC_c36128/f1p0/3205	Transcript	moderately similar to ( 491) AT1G71490 | Symbols: | pentatricopeptide (PPR) repeat-containing protein | chr1:26933326-26935371 REVERSE protein|expressed protein	7.93055
27.3.25	RNA.regulation of transcription.MYB domain transcription factor family	i3_HQ_LWC_c10756/f8p0/3307	Transcript	moderately similar to ( 417) AT3G57430 | Symbols: | pentatricopeptide (PPR) repeat-containing protein | chr3:21255731-21258403 REVERSEweakly similar to ( 118) RF1_ORYSA Rf1 protein, mitochondrial precursor (PPR protein) (Fertility restorer) (Restorer for CMS) - Oryza sativa (Rice) protein|pentatricopeptide, putative, expressed	-3.00681
27.3.25	RNA.regulation of transcription.MYB domain transcription factor family	i4_LQ_LWC_c11758/f1p0/4926	Transcript	highly similar to ( 574) AT4G18520 | Symbols: | INVOLVED IN: biological_process unknown; EXPRESSED IN: 21 plant structures; EXPRESSED DURING: 9 growth stages; CONTAINS InterPro DOMAIN/s: Pentatricopeptide repeat (InterPro:IPR002885); BEST Arabidopsis thaliana protein match is: pentatricopeptide (PPR) repeat-containing protein (TAIR:AT4G39530.1); Has 16698 Blast hits to 4567 proteins in 114 specie…	-4.5671
27.3.25	RNA.regulation of transcription.MYB domain transcription factor family	i2_LQ_LWC_c55441/f1p0/2904	Transcript	highly similar to ( 897) AT1G68930 | Symbols: | pentatricopeptide (PPR) repeat-containing protein | chr1:25918314-25920545 FORWARDweakly similar to ( 106) RF1_ORYSA Rf1 protein, mitochondrial precursor (PPR protein) (Fertility restorer) (Restorer for CMS) - Oryza sativa (Rice) protein|pentatricopeptide, putative, expressed	6.26586
27.3.25	RNA.regulation of transcription.MYB domain transcription factor family	i1_LQ_LWC_c14241/f1p0/1440	Transcript	moderately similar to ( 215) AT1G79180 | Symbols: ATMYB63, MYB63 | MYB63 (MYB DOMAIN PROTEIN 63); DNA binding / transcription activator/ transcription factor | chr1:29786509-29787589 FORWARDmoderately similar to ( 243) MYB1_MAIZE Myb-related protein Zm1 - Zea mays (Maize) REB1 protein|MYB family transcription factor, putative, expressed	7.38665
27.3.25	RNA.regulation of transcription.MYB domain transcription factor family	i1_LQ_LWC_c19499/f1p0/1550	Transcript	moderately similar to ( 258) AT4G21440 | Symbols: ATMYB102, ATM4 | ATMYB102 (ARABIDOPSIS MYB-LIKE 102); DNA binding / transcription factor | chr4:11418425-11419652 REVERSEmoderately similar to ( 214) MYB38_MAIZE Myb-related protein Zm38 - Zea mays (Maize) REB1 protein|MYB family transcription factor, putative, expressed	8.30115
27.3.25	RNA.regulation of transcription.MYB domain transcription factor family	i1_LQ_LWC_c33776/f1p1/1472	Transcript	moderately similar to ( 268) AT5G62470 | Symbols: MYB96 | MYB96 (myb domain protein 96); DNA binding / transcription factor | chr5:25079434-25080858 REVERSEweakly similar to ( 180) MYB4_ORYSA Myb-related protein Myb4 (OsMyb4) (Transcription factor RLTR1) - Oryza sativa (Rice) REB1 protein|MYB family transcription factor, putative, expressed	0
27.3.25	RNA.regulation of transcription.MYB domain transcription factor family	i1_LQ_LWC_c10238/f1p1/1776	Transcript	moderately similar to ( 209) AT4G13480 | Symbols: AtMYB79 | AtMYB79 (myb domain protein 79); DNA binding / transcription factor | chr4:7836675-7837653 FORWARDweakly similar to ( 160) MYBA2_ORYSA Myb-related protein MYBAS2 - Oryza sativa (Rice) protein|MYB family transcription factor, putative, expressed	-5.84968
27.3.25	RNA.regulation of transcription.MYB domain transcription factor family	i0_LQ_LWC_c1857/f1p0/954	Transcript	moderately similar to ( 468) AT2G36960 | Symbols: TKI1 | TKI1 (TSL-kinase interacting protein 1); DNA binding / transcription factor | chr2:15523552-15527245 FORWARD protein|myb/SANT domain protein, putative, expressed	-11.9609
27.3.25	RNA.regulation of transcription.MYB domain transcription factor family	i2_LQ_LWC_c33402/f1p0/2865	Transcript	highly similar to ( 599) AT3G57430 | Symbols: | pentatricopeptide (PPR) repeat-containing protein | chr3:21255731-21258403 REVERSEweakly similar to ( 105) RF1_ORYSA Rf1 protein, mitochondrial precursor (PPR protein) (Fertility restorer) (Restorer for CMS) - Oryza sativa (Rice) protein|pentatricopeptide repeat protein PPR986-12, putative, expressed	-3.72891
27.3.25	RNA.regulation of transcription.MYB domain transcription factor family	i2_LQ_LWC_c71723/f1p0/2123	Transcript	moderately similar to ( 432) AT3G58590 | Symbols: | pentatricopeptide (PPR) repeat-containing protein | chr3:21666262-21668487 FORWARD protein|pentatricopeptide, putative, expressed	-7.548
27.3.25	RNA.regulation of transcription.MYB domain transcription factor family	i3_LQ_LWC_c8041/f1p0/3323	Transcript	moderately similar to ( 219) AT3G05380 | Symbols: ALY2, ATALY2 | DNA binding / nucleic acid binding / transcription factor | chr3:1540961-1546139 FORWARD DIRP protein|DIRP family protein, putative, expressed	0
27.3.25	RNA.regulation of transcription.MYB domain transcription factor family	i8_LQ_LWC_c96/f1p0/8752	Transcript	highly similar to ( 755) AT4G21300 | Symbols: | pentatricopeptide (PPR) repeat-containing protein | chr4:11336479-11339052 FORWARDweakly similar to ( 119) RF1_ORYSA Rf1 protein, mitochondrial precursor (PPR protein) (Fertility restorer) (Restorer for CMS) - Oryza sativa (Rice) protein|pentatricopeptide, putative, expressed	5.2505
27.3.25	RNA.regulation of transcription.MYB domain transcription factor family	i1_LQ_LWC_c8768/f1p0/1767	Transcript	moderately similar to ( 445) AT2G29760 | Symbols: | pentatricopeptide (PPR) repeat-containing protein | chr2:12712884-12715100 FORWARDvery weakly similar to (95.1) RF1_ORYSA Rf1 protein, mitochondrial precursor (PPR protein) (Fertility restorer) (Restorer for CMS) - Oryza sativa (Rice) protein|expressed protein	-8.00152
27.3.25	RNA.regulation of transcription.MYB domain transcription factor family	i2_LQ_LWC_c39630/f1p0/2177	Transcript	moderately similar to ( 203) AT4G18770 | Symbols: MYB98, AtMYB98 | MYB98 (myb domain protein 98); DNA binding / transcription factor | chr4:10311068-10312557 FORWARDweakly similar to ( 107) GAM1_ORYSA Transcription factor GAMYB (OsGAMyb) - Oryza sativa (Rice) REB1 protein|MYB family transcription factor, putative, expressed	9.65654
27.3.25	RNA.regulation of transcription.MYB domain transcription factor family	i2_HQ_LWC_c8163/f2p0/2387	Transcript	moderately similar to ( 315) AT4G13650 | Symbols: | pentatricopeptide (PPR) repeat-containing protein | chr4:7939611-7942898 REVERSEweakly similar to ( 103) RF1_ORYSA Rf1 protein, mitochondrial precursor (PPR protein) (Fertility restorer) (Restorer for CMS) - Oryza sativa (Rice) protein|vegetative storage protein, putative, expressed	7.39337
27.3.25	RNA.regulation of transcription.MYB domain transcription factor family	i2_LQ_LWC_c106373/f1p0/2530	Transcript	highly similar to ( 828) AT1G56690 | Symbols: | pentatricopeptide (PPR) repeat-containing protein | chr1:21253817-21255931 FORWARDweakly similar to ( 124) RF1_ORYSA Rf1 protein, mitochondrial precursor (PPR protein) (Fertility restorer) (Restorer for CMS) - Oryza sativa (Rice) protein|pentatricopeptide, putative, expressed	-11.5683
27.3.25	RNA.regulation of transcription.MYB domain transcription factor family	i2_LQ_LWC_c65650/f1p1/2757	Transcript	moderately similar to ( 446) AT2G47210 | Symbols: | myb family transcription factor | chr2:19379039-19382204 FORWARD protein|MYB family transcription factor, putative, expressed	-3.81903
27.3.25	RNA.regulation of transcription.MYB domain transcription factor family	i1_LQ_LWC_c19219/f1p0/1896	Transcript	moderately similar to ( 383) AT1G08070 | Symbols: | pentatricopeptide (PPR) repeat-containing protein | chr1:2514374-2516599 REVERSEvery weakly similar to (98.6) RF1_ORYSA Rf1 protein, mitochondrial precursor (PPR protein) (Fertility restorer) (Restorer for CMS) - Oryza sativa (Rice) protein|pentatricopeptide, putative, expressed	-3.03868
27.3.25	RNA.regulation of transcription.MYB domain transcription factor family	i1_HQ_LWC_c27717/f3p0/1398	Transcript	moderately similar to ( 232) AT5G26660 | Symbols: ATMYB4, ATMYB86 | ATMYB86 (MYB DOMAIN PROTEIN 86); specific transcriptional repressor/ transcription repressor | chr5:9331775-9333044 REVERSEmoderately similar to ( 309) MYB3_HORVU Myb-related protein Hv33 - Hordeum vulgare (Barley) protein|MYB family transcription factor, putative, expressed	11.0499
27.3.25	RNA.regulation of transcription.MYB domain transcription factor family	i2_LQ_LWC_c24131/f1p0/2451	Transcript	moderately similar to ( 485) AT3G11460 | Symbols: | pentatricopeptide (PPR) repeat-containing protein | chr3:3608250-3610121 FORWARD protein|pentatricopeptide repeat-containing protein, putative, expressed	0
27.3.25	RNA.regulation of transcription.MYB domain transcription factor family	i1_LQ_LWC_c38286/f1p0/1219	Transcript	weakly similar to ( 162) AT1G17950 | Symbols: ATMYB52, BW52, MYB52 | MYB52 (MYB DOMAIN PROTEIN 52); DNA binding / transcription factor | chr1:6177764-6179063 FORWARDvery weakly similar to (86.7) GAM1_ORYSA Transcription factor GAMYB (OsGAMyb) - Oryza sativa (Rice) REB1 protein|MYB family transcription factor, putative, expressed	-2.94729
27.3.25	RNA.regulation of transcription.MYB domain transcription factor family	i5_LQ_LWC_c3364/f1p1/5616	Transcript	highly similar to ( 897) AT2G27610 | Symbols: | pentatricopeptide (PPR) repeat-containing protein | chr2:11783927-11786533 REVERSEweakly similar to ( 109) RF1_ORYSA Rf1 protein, mitochondrial precursor (PPR protein) (Fertility restorer) (Restorer for CMS) - Oryza sativa (Rice) protein|pentatricopeptide, putative, expressed	7.11492
27.3.25	RNA.regulation of transcription.MYB domain transcription factor family	i3_LQ_LWC_c24158/f1p0/3842	Transcript	highly similar to ( 766) AT1G25360 | Symbols: | pentatricopeptide (PPR) repeat-containing protein | chr1:8894428-8896800 FORWARDweakly similar to ( 108) RF1_ORYSA Rf1 protein, mitochondrial precursor (PPR protein) (Fertility restorer) (Restorer for CMS) - Oryza sativa (Rice) protein|pentatricopeptide repeat domain containing protein, putative, expressed	0
27.3.25	RNA.regulation of transcription.MYB domain transcription factor family	i2_LQ_LWC_c88641/f1p0/2780	Transcript	moderately similar to ( 291) AT4G38620 | Symbols: ATMYB4, MYB4 | MYB4; DNA binding / transcription factor | chr4:18053866-18054876 FORWARDmoderately similar to ( 372) MYB1_HORVU Myb-related protein Hv1 - Hordeum vulgare (Barley) REB1 protein|MYB family transcription factor, putative, expressed	7.29877
27.3.25	RNA.regulation of transcription.MYB domain transcription factor family	i1_LQ_LWC_c22547/f1p0/1875	Transcript	moderately similar to ( 230) AT1G48000 | Symbols: MYB112, AtMYB112 | MYB112 (myb domain protein 112); DNA binding / transcription factor | chr1:17704269-17706377 REVERSEweakly similar to ( 154) GAM1_ORYSA Transcription factor GAMYB (OsGAMyb) - Oryza sativa (Rice) protein|MYB family transcription factor, putative, expressed	-3.78159
27.3.25	RNA.regulation of transcription.MYB domain transcription factor family	i2_HQ_LWC_c19239/f5p2/2605	Transcript	moderately similar to ( 403) AT2G13600 | Symbols: | pentatricopeptide (PPR) repeat-containing protein | chr2:5671493-5673586 FORWARDweakly similar to ( 141) RF1_ORYSA Rf1 protein, mitochondrial precursor (PPR protein) (Fertility restorer) (Restorer for CMS) - Oryza sativa (Rice) protein|tetratricopeptide-like helical, putative, expressed	-2.37976
27.3.25	RNA.regulation of transcription.MYB domain transcription factor family	i2_LQ_LWC_c49692/f1p0/2380	Transcript	highly similar to ( 647) AT4G14050 | Symbols: | pentatricopeptide (PPR) repeat-containing protein | chr4:8103645-8105483 REVERSEvery weakly similar to (81.6) RF1_ORYSA Rf1 protein, mitochondrial precursor (PPR protein) (Fertility restorer) (Restorer for CMS) - Oryza sativa (Rice) protein|pentatricopeptide, putative, expressed	7.364
27.3.25	RNA.regulation of transcription.MYB domain transcription factor family	i5_LQ_LWC_c5876/f1p6/5633	Transcript	highly similar to ( 578) AT4G39952 | Symbols: | pentatricopeptide (PPR) repeat-containing protein | chr4:18527680-18530007 FORWARDweakly similar to ( 107) RF1_ORYSA Rf1 protein, mitochondrial precursor (PPR protein) (Fertility restorer) (Restorer for CMS) - Oryza sativa (Rice) protein|pentatricopeptide, putative, expressed	0
27.3.25	RNA.regulation of transcription.MYB domain transcription factor family	i2_LQ_LWC_c47282/f1p0/2672	Transcript	moderately similar to ( 416) AT4G37380 | Symbols: | pentatricopeptide (PPR) repeat-containing protein | chr4:17572040-17573938 REVERSE protein|pentatricopeptide, putative, expressed	7.05538
27.3.25	RNA.regulation of transcription.MYB domain transcription factor family	i2_HQ_LWC_c3302/f3p0/2669	Transcript	highly similar to ( 550) AT3G26540 | Symbols: | pentatricopeptide (PPR) repeat-containing protein | chr3:9744542-9746644 REVERSEvery weakly similar to (81.3) RF1_ORYSA Rf1 protein, mitochondrial precursor (PPR protein) (Fertility restorer) (Restorer for CMS) - Oryza sativa (Rice) protein|pentatricopeptide, putative, expressed	-2.73562
27.3.25	RNA.regulation of transcription.MYB domain transcription factor family	i4_LQ_LWC_c19571/f1p0/4993	Transcript	moderately similar to ( 439) AT1G23450 | Symbols: | pentatricopeptide (PPR) repeat-containing protein | chr1:8324698-8326697 FORWARD protein|expressed protein	8.67242
27.3.25	RNA.regulation of transcription.MYB domain transcription factor family	i2_LQ_LWC_c33914/f1p0/2423	Transcript	highly similar to ( 542) AT2G20540 | Symbols: | pentatricopeptide (PPR) repeat-containing protein | chr2:8844160-8845764 FORWARDvery weakly similar to (80.1) RF1_ORYSA Rf1 protein, mitochondrial precursor (PPR protein) (Fertility restorer) (Restorer for CMS) - Oryza sativa (Rice) protein|pentatricopeptide, putative, expressed	7.01707
27.3.25	RNA.regulation of transcription.MYB domain transcription factor family	i1_HQ_LWC_c10923/f2p0/1899	Transcript	weakly similar to ( 158) AT2G36960 | Symbols: TKI1 | TKI1 (TSL-kinase interacting protein 1); DNA binding / transcription factor | chr2:15523552-15527245 FORWARD protein|myb/SANT domain protein, putative, expressed	-5.79852
27.3.26	RNA.regulation of transcription.MYB-related transcription factor family	i1_LQ_LWC_c31589/f1p1/1513	Transcript	weakly similar to ( 147) AT5G56840 | Symbols: | DNA-binding family protein | chr5:22980789-22982152 FORWARD protein|Myb transcription factor, putative, expressed	3.49578
27.3.26	RNA.regulation of transcription.MYB-related transcription factor family	i1_LQ_LWC_c32095/f1p0/1426	Transcript	moderately similar to ( 216) AT5G08520 | Symbols: | myb family transcription factor | chr5:2755470-2757741 REVERSE protein|MYB_Al protein, putative, expressed	1.96948
27.3.26	RNA.regulation of transcription.MYB-related transcription factor family	i1_LQ_LWC_c10005/f1p13/1708	Transcript	weakly similar to ( 194) AT2G38090 | Symbols: | myb family transcription factor | chr2:15945278-15946775 FORWARD protein|MYB family transcription factor, putative, expressed	10.4752
27.3.26	RNA.regulation of transcription.MYB-related transcription factor family	i2_HQ_LWC_c19604/f2p3/2798	Transcript	highly similar to ( 944) AT1G09770 | Symbols: ATCDC5, CDC5, ATMYBCDC5 | ATCDC5 (ARABIDOPSIS THALIANA CELL DIVISION CYCLE 5); DNA binding / transcription factor | chr1:3162002-3165122 FORWARD REB1 protein|MYB family transcription factor, putative, expressed	11.9823
27.3.26	RNA.regulation of transcription.MYB-related transcription factor family	i1_LQ_LWC_c37875/f1p0/1309	Transcript	weakly similar to ( 145) AT5G56840 | Symbols: | DNA-binding family protein | chr5:22980789-22982152 FORWARD protein|Myb transcription factor, putative, expressed	12.3272
27.3.26	RNA.regulation of transcription.MYB-related transcription factor family	i2_LQ_LWC_c17541/f1p1/2608	Transcript	moderately similar to ( 269) AT5G47390 | Symbols: | myb family transcription factor | chr5:19227001-19228546 FORWARD protein|MYB family transcription factor, putative, expressed	5.65139
27.3.26	RNA.regulation of transcription.MYB-related transcription factor family	i1_LQ_LWC_c34366/f1p6/1517	Transcript	moderately similar to ( 234) AT2G38090 | Symbols: | myb family transcription factor | chr2:15945278-15946775 FORWARD protein|MYB family transcription factor, putative, expressed	7.4342
27.3.26	RNA.regulation of transcription.MYB-related transcription factor family	i1_HQ_LWC_c6565/f2p4/1812	Transcript	weakly similar to ( 125) AT5G47390 | Symbols: | myb family transcription factor | chr5:19227001-19228546 FORWARD protein|MYB family transcription factor, putative, expressed	10.6176
27.3.27	RNA.regulation of transcription.NAC domain transcription factor family	i1_LQ_LWC_c3049/f1p0/1926	Transcript	moderately similar to ( 250) AT5G60720 | Symbols: | unknown protein | chr5:24418436-24422177 REVERSEDUF547 protein|expressed protein	-10.792
27.3.27	RNA.regulation of transcription.NAC domain transcription factor family	i2_LQ_LWC_c86944/f1p1/2168	Transcript	moderately similar to ( 343) AT5G66600 | Symbols: | unknown protein | chr5:26575105-26578315 REVERSEDUF547 protein|ternary complex factor MIP1, putative, expressed	3.77267
27.3.27	RNA.regulation of transcription.NAC domain transcription factor family	i2_HQ_LWC_c77473/f4p1/2433	Transcript	moderately similar to ( 420) AT5G47380 | Symbols: | unknown protein | chr5:19221472-19224471 REVERSEDUF547 protein|ternary complex factor MIP1, putative, expressed	0
27.3.27	RNA.regulation of transcription.NAC domain transcription factor family	i2_HQ_LWC_c127409/f5p3/2192	Transcript	moderately similar to ( 377) AT4G37080 | Symbols: | unknown protein | chr4:17474205-17476716 FORWARDDUF547 protein|expressed protein	8.52829
27.3.27	RNA.regulation of transcription.NAC domain transcription factor family	i1_LQ_LWC_c32458/f1p0/1762	Transcript	moderately similar to ( 261) AT2G39690 | Symbols: | unknown protein | chr2:16541489-16543267 FORWARDDUF547 protein|expressed protein	-6.61926
27.3.27	RNA.regulation of transcription.NAC domain transcription factor family	i1_LQ_LWC_c34500/f1p0/1673	Transcript	moderately similar to ( 351) AT3G56570 | Symbols: | SET domain-containing protein | chr3:20958660-20961137 FORWARD protein|SET domain containing protein, expressed	-2.03559
27.3.27	RNA.regulation of transcription.NAC domain transcription factor family	i2_LQ_LWC_c114091/f1p0/2076	Transcript	weakly similar to ( 196) AT1G76620 | Symbols: | unknown protein | chr1:28756787-28759131 FORWARDDUF547 protein|ternary complex factor MIP1, putative, expressed	-9.73627
27.3.29	RNA.regulation of transcription.TCP transcription factor family	i2_LQ_LWC_c6147/f1p0/2627	Transcript	very weakly similar to (81.6) AT1G30210 | Symbols: TCP24 | TCP24 (TEOSINTE BRANCHED1, CYCLOIDEA, AND PCF FAMILY 24); transcription factor | chr1:10628754-10629728 REVERSETCP protein|transposon protein, putative, unclassified, expressed	5.29424
27.3.29	RNA.regulation of transcription.TCP transcription factor family	i1_LQ_LWC_c22131/f1p5/1616	Transcript	weakly similar to ( 169) AT3G15030 | Symbols: TCP4 | TCP4 (TCP family transcription factor 4); transcription factor | chr3:5062308-5063570 FORWARDTCP protein|TCP family transcription factor, putative, expressed	-13.25
27.3.29	RNA.regulation of transcription.TCP transcription factor family	i1_LQ_LWC_c30278/f1p0/1785	Transcript	weakly similar to ( 148) AT1G69690 | Symbols: | TCP family transcription factor, putative | chr1:26216449-26217426 FORWARDTCP protein|TCP-domain protein, putative, expressed	-1.91596
27.3.29	RNA.regulation of transcription.TCP transcription factor family	i1_LQ_LWC_c35023/f1p1/1707	Transcript	weakly similar to ( 130) AT5G60970 | Symbols: TCP5 | TCP5 (TEOSINTE BRANCHED1, CYCLOIDEA AND PCF TRANSCRIPTION FACTOR 5); transcription factor | chr5:24535570-24536652 REVERSETCP protein|TCP family transcription factor, putative, expressed	-8.78123
27.3.30	RNA.regulation of transcription.Trihelix, Triple-Helix transcription factor family	i1_LQ_LWC_c2918/f3p0/1687	Transcript	weakly similar to ( 109) AT3G14180 | Symbols: | transcription factor | chr3:4707290-4708621 REVERSE protein|transcription factor like protein, putative, expressed	6.5032
27.3.30	RNA.regulation of transcription.Trihelix, Triple-Helix transcription factor family	i2_LQ_LWC_c48039/f1p0/2209	Transcript	weakly similar to ( 103) AT3G14180 | Symbols: | transcription factor | chr3:4707290-4708621 REVERSE protein|transcription factor like protein, putative, expressed	13.3111
27.3.30	RNA.regulation of transcription.Trihelix, Triple-Helix transcription factor family	i1_LQ_LWC_c32148/f1p0/1765	Transcript	weakly similar to ( 130) AT5G14540 | Symbols: | proline-rich family protein | chr5:4687333-4689624 REVERSEDUF1421 protein|retrotransposon protein, putative, unclassified, expressed	-6.44424
27.3.30	RNA.regulation of transcription.Trihelix, Triple-Helix transcription factor family	i1_LQ_LWC_c17064/f1p0/1537	Transcript	weakly similar to ( 130) AT3G58630 | Symbols: | transcription factor | chr3:21683928-21685771 REVERSE protein|transcription factor like protein, putative, expressed	5.05091
27.3.30	RNA.regulation of transcription.Trihelix, Triple-Helix transcription factor family	i1_LQ_LWC_c4397/f1p0/1967	Transcript	moderately similar to ( 269) AT1G21200 | Symbols: | transcription factor | chr1:7421483-7422814 FORWARD protein|homeodomain, putative, expressed	2.23023
27.3.30	RNA.regulation of transcription.Trihelix, Triple-Helix transcription factor family	i1_LQ_LWC_c31309/f1p0/1530	Transcript	moderately similar to ( 425) AT4G17050 | Symbols: UGLYAH | UGLYAH (UREIDOGLYCINE AMINOHYDROLASE); transcription factor | chr4:9589662-9592413 FORWARDPRK11171 GlxB protein|cupin 2, conserved barrel domain protein, putative, expressed	3.13369
27.3.30	RNA.regulation of transcription.Trihelix, Triple-Helix transcription factor family	i4_LQ_LWC_c8187/f1p3/4803	Transcript	very weakly similar to (91.3) AT3G24490 | Symbols: | transcription factor | chr3:8911022-8912023 FORWARD protein|transcription factor like protein, putative, expressed	10.5568
27.3.30	RNA.regulation of transcription.Trihelix, Triple-Helix transcription factor family	i1_LQ_LWC_c22093/f1p0/2000	Transcript	moderately similar to ( 272) AT1G21200 | Symbols: | transcription factor | chr1:7421483-7422814 FORWARD protein|homeodomain, putative, expressed	4.04239
27.3.32	RNA.regulation of transcription.WRKY domain transcription factor family	i2_LQ_LWC_c8508/f1p0/2662	Transcript	weakly similar to ( 174) AT1G30650 | Symbols: WRKY14, ATWRKY14, AR411 | WRKY14; transcription factor | chr1:10868612-10870973 FORWARDWRKY protein|WRKY80, expressed	7.95273
27.3.32	RNA.regulation of transcription.WRKY domain transcription factor family	i1_LQ_LWC_c34927/f1p0/1483	Transcript	weakly similar to ( 115) AT2G46400 | Symbols: WRKY46, ATWRKY46 | WRKY46; transcription factor | chr2:19043676-19044754 REVERSEWRKY protein|WRKY74, expressed	4.43638
27.3.32	RNA.regulation of transcription.WRKY domain transcription factor family	i1_LQ_LWC_c7112/f1p0/1655	Transcript	weakly similar to ( 159) AT5G13080 | Symbols: WRKY75, ATWRKY75 | WRKY75; transcription factor | chr5:4149928-4151019 REVERSEWRKY protein|WRKY72, expressed	0
27.3.32	RNA.regulation of transcription.WRKY domain transcription factor family	i1_LQ_LWC_c11635/f1p0/1937	Transcript	weakly similar to ( 145) AT5G15130 | Symbols: WRKY72, ATWRKY72 | WRKY72; transcription factor | chr5:4904426-4906879 FORWARDWRKY protein|WRKY107, expressed	13.6958
27.3.32	RNA.regulation of transcription.WRKY domain transcription factor family	i2_HQ_LWC_c5316/f3p1/2478	Transcript	moderately similar to ( 288) AT5G56270 | Symbols: WRKY2, ATWRKY2 | WRKY2; transcription factor | chr5:22780816-22783137 FORWARDWRKY protein|WRKY35, expressed	0
27.3.32	RNA.regulation of transcription.WRKY domain transcription factor family	i2_LQ_LWC_c71825/f1p0/2205	Transcript	weakly similar to ( 190) AT5G15130 | Symbols: WRKY72, ATWRKY72 | WRKY72; transcription factor | chr5:4904426-4906879 FORWARDWRKY protein|WRKY73, expressed	4.73356
27.3.32	RNA.regulation of transcription.WRKY domain transcription factor family	i2_HQ_LWC_c12823/f2p0/2735	Transcript	weakly similar to ( 153) AT4G39410 | Symbols: WRKY13, ATWRKY13 | WRKY13; transcription factor | chr4:18332937-18334789 REVERSEWRKY protein|WRKY102, expressed	-5.54309
27.3.32	RNA.regulation of transcription.WRKY domain transcription factor family	i0_LQ_LWC_c803/f1p0/877	Transcript	weakly similar to ( 144) AT4G01250 | Symbols: WRKY22, AtWRKY22 | WRKY22; transcription factor | chr4:522839-524129 REVERSEWRKY protein|WRKY39, expressed	9.5207
27.3.32	RNA.regulation of transcription.WRKY domain transcription factor family	i2_LQ_LWC_c41563/f1p0/2028	Transcript	weakly similar to ( 160) AT1G68150 | Symbols: WRKY9, ATWRKY9 | WRKY9; transcription factor | chr1:25543970-25545615 FORWARDWRKY protein|WRKY32, expressed	0.861488
27.3.32	RNA.regulation of transcription.WRKY domain transcription factor family	i1_LQ_LWC_c21040/f1p2/1452	Transcript	weakly similar to ( 146) AT2G25000 | Symbols: WRKY60, ATWRKY60 | WRKY60; transcription factor | chr2:10629812-10631095 FORWARDWRKY protein|WRKY28, expressed	7.94868
27.3.32	RNA.regulation of transcription.WRKY domain transcription factor family	i1_HQ_LWC_c9827/f3p0/1593	Transcript	weakly similar to ( 109) AT1G80840 | Symbols: WRKY40, ATWRKY40 | WRKY40; transcription factor | chr1:30383834-30385356 FORWARD protein|WRKY71, expressed	-9.95298
27.3.32	RNA.regulation of transcription.WRKY domain transcription factor family	i1_LQ_LWC_c36450/f1p2/1858	Transcript	weakly similar to ( 130) AT4G01250 | Symbols: WRKY22, AtWRKY22 | WRKY22; transcription factor | chr4:522839-524129 REVERSEWRKY protein|WRKY12, expressed	10.3545
27.3.32	RNA.regulation of transcription.WRKY domain transcription factor family	i1_LQ_LWC_c19364/f1p1/1737	Transcript	weakly similar to ( 191) AT3G04670 | Symbols: WRKY39, ATWRKY39 | WRKY39; calmodulin binding / transcription factor | chr3:1266737-1267691 REVERSEWRKY protein|WRKY121, expressed	7.31784
27.3.32	RNA.regulation of transcription.WRKY domain transcription factor family	i1_LQ_LWC_c21190/f1p0/1893	Transcript	moderately similar to ( 241) AT2G38470 | Symbols: WRKY33, ATWRKY33 | WRKY33; transcription factor | chr2:16108476-16110539 FORWARDWRKY protein|WRKY70, expressed	1.85749
27.3.32	RNA.regulation of transcription.WRKY domain transcription factor family	i2_LQ_LWC_c85901/f1p0/2168	Transcript	weakly similar to ( 124) AT4G11070 | Symbols: WRKY41, AtWRKY41 | WRKY41; transcription factor | chr4:6759303-6760763 FORWARDWRKY protein|WRKY19, expressed	8.17809
27.3.32	RNA.regulation of transcription.WRKY domain transcription factor family	i2_LQ_LWC_c68862/f1p0/2465	Transcript	moderately similar to ( 327) AT5G56270 | Symbols: WRKY2, ATWRKY2 | WRKY2; transcription factor | chr5:22780816-22783137 FORWARDWRKY protein|WRKY30, expressed	-10.6939
27.3.34	RNA.regulation of transcription.Orphan family	i1_LQ_LWC_c19154/f1p1/1713	Transcript	weakly similar to ( 159) AT1G48380 | Symbols: RHL1, HYP7 | RHL1 (ROOT HAIRLESS 1); DNA binding / protein binding | chr1:17877637-17879203 REVERSE protein|ROOT HAIRLESS 1, putative, expressed	8.56143
27.3.34	RNA.regulation of transcription.Orphan family	i2_HQ_LWC_c31259/f2p0/2666	Transcript	moderately similar to ( 239) AT3G16000 | Symbols: MFP1 | MFP1 (MAR BINDING FILAMENT-LIKE PROTEIN 1); DNA binding | chr3:5431041-5433613 REVERSEmoderately similar to ( 239) MFP1_TOBAC MAR-binding filament-like protein 1-1 - Nicotiana tabacum (Common tobacco) protein|MAR-binding filament-like protein 1, putative, expressed	-4.48227
27.3.35	RNA.regulation of transcription.bZIP transcription factor family	i1_HQ_LWC_c29681/f2p0/1990	Transcript	moderately similar to ( 237) AT2G40950 | Symbols: BZIP17 | BZIP17; DNA binding / transcription activator/ transcription factor | chr2:17087823-17090326 REVERSE protein|bZIP transcription factor domain containing protein, expressed	-3.59612
27.3.35	RNA.regulation of transcription.bZIP transcription factor family	i1_LQ_LWC_c12378/f1p0/1872	Transcript	moderately similar to ( 369) AT4G35240 | Symbols: | unknown protein | chr4:16761479-16764324 REVERSEDUF632 protein|DUF630/DUF632 domains containing protein, putative, expressed	0
27.3.35	RNA.regulation of transcription.bZIP transcription factor family	i1_LQ_LWC_c20291/f1p0/2024	Transcript	weakly similar to ( 137) AT2G41070 | Symbols: EEL, ATBZIP12, DPBF4 | EEL (ENHANCED EM LEVEL); DNA binding / transcription factor | chr2:17131249-17132208 FORWARD protein|bZIP transcription factor domain containing protein, expressed	-7.41669
27.3.35	RNA.regulation of transcription.bZIP transcription factor family	i1_LQ_LWC_c7648/f1p0/1921	Transcript	very weakly similar to (94.4) AT3G14880 | Symbols: | FUNCTIONS IN: molecular_function unknown; INVOLVED IN: biological_process unknown; BEST Arabidopsis thaliana protein match is: DOG1 (DELAY OF GERMINATION 1) (TAIR:AT5G45830.1); Has 368 Blast hits to 367 proteins in 28 species: Archae - 0; Bacteria - 0; Metazoa - 2; Fungi - 0; Plants - 366; Viruses - 0; Other Eukaryotes - 0 (source: NCBI BLink).…	-3.29299
27.3.35	RNA.regulation of transcription.bZIP transcription factor family	i3_LQ_LWC_c20861/f1p21/3109	Transcript	weakly similar to ( 144) AT1G43700 | Symbols: VIP1 | VIP1 (VIRE2-INTERACTING PROTEIN 1); protein binding / transcription factor | chr1:16484352-16486017 FORWARDweakly similar to ( 129) RF2B_ORYSA Transcription factor RF2b - Oryza sativa (Rice) protein|bZIP transcription factor domain containing protein, expressed	7.55915
27.3.35	RNA.regulation of transcription.bZIP transcription factor family	i1_HQ_LWC_c19844/f2p2/1556	Transcript	weakly similar to ( 151) AT1G32150 | Symbols: | bZIP transcription factor family protein | chr1:11566022-11568317 FORWARDmoderately similar to ( 328) HBP1A_WHEAT Transcription factor HBP-1a (Histone-specific transcription factor HBP1) - Triticum aestivum (Wheat)MFMR bZIP_1 BRLZ protein|transcription factor, putative, expressed	0
27.3.35	RNA.regulation of transcription.bZIP transcription factor family	i1_LQ_LWC_c21900/f2p0/1464	Transcript	moderately similar to ( 355) AT3G12250 | Symbols: TGA6, BZIP45 | TGA6 (TGACG MOTIF-BINDING FACTOR 6); DNA binding / transcription factor | chr3:3906636-3908583 FORWARDmoderately similar to ( 403) HBP1B_WHEAT Transcription factor HBP-1b(c38) - Triticum aestivum (Wheat) protein|transcription factor, putative, expressed	11.9424
27.3.35	RNA.regulation of transcription.bZIP transcription factor family	i1_LQ_LWC_c19189/f1p0/1555	Transcript	moderately similar to ( 204) AT1G27000 | Symbols: | bZIP family transcription factor | chr1:9374068-9376422 FORWARDDUF1664 protein|expressed protein	-2.92475
27.3.35	RNA.regulation of transcription.bZIP transcription factor family	i0_LQ_LWC_c373/f1p0/966	Transcript	weakly similar to ( 134) AT1G43700 | Symbols: VIP1 | VIP1 (VIRE2-INTERACTING PROTEIN 1); protein binding / transcription factor | chr1:16484352-16486017 FORWARDweakly similar to ( 127) RF2B_ORYSA Transcription factor RF2b - Oryza sativa (Rice) protein|bZIP transcriptional activator RSG, putative, expressed	-1.13426
27.3.35	RNA.regulation of transcription.bZIP transcription factor family	i1_HQ_LWC_c11086/f2p0/1795	Transcript	moderately similar to ( 335) AT5G10030 | Symbols: TGA4, OBF4 | TGA4 (TGACG MOTIF-BINDING FACTOR 4); DNA binding / calmodulin binding / transcription factor | chr5:3137648-3139295 REVERSEmoderately similar to ( 293) TGA1A_TOBAC TGACG-sequence-specific DNA-binding protein TGA-1A (TGA1a) (ASF-1 protein) - Nicotiana tabacum (Common tobacco) protein|transcription factor, putative, expressed	2.98135
27.3.35	RNA.regulation of transcription.bZIP transcription factor family	i1_LQ_LWC_c19595/f1p10/2131	Transcript	moderately similar to ( 266) AT5G06839 | Symbols: | bZIP family transcription factor | chr5:2120911-2126217 FORWARDmoderately similar to ( 236) TGA21_TOBAC TGACG-sequence-specific DNA-binding protein TGA-2.1 (TGA2.1) - Nicotiana tabacum (Common tobacco) protein|transcription factor, putative, expressed	4.4344
27.3.35	RNA.regulation of transcription.bZIP transcription factor family	i1_LQ_LWC_c33857/f1p5/1991	Transcript	moderately similar to ( 353) AT1G08320 | Symbols: | bZIP family transcription factor | chr1:2622113-2627451 REVERSEmoderately similar to ( 321) TGA21_TOBAC TGACG-sequence-specific DNA-binding protein TGA-2.1 (TGA2.1) - Nicotiana tabacum (Common tobacco) protein|transcription factor, putative, expressed	7.00561
27.3.35	RNA.regulation of transcription.bZIP transcription factor family	i1_LQ_LWC_c11857/f1p0/1749	Transcript	moderately similar to ( 338) AT3G12250 | Symbols: TGA6, BZIP45 | TGA6 (TGACG MOTIF-BINDING FACTOR 6); DNA binding / transcription factor | chr3:3906636-3908583 FORWARDmoderately similar to ( 359) TGA21_TOBAC TGACG-sequence-specific DNA-binding protein TGA-2.1 (TGA2.1) - Nicotiana tabacum (Common tobacco) protein|transcription factor, putative, expressed	3.10864
27.3.35	RNA.regulation of transcription.bZIP transcription factor family	i2_LQ_LWC_c103575/f1p0/2911	Transcript	moderately similar to ( 317) AT4G35240 | Symbols: | unknown protein | chr4:16761479-16764324 REVERSEDUF632 protein|expressed protein	9.74981
27.3.35	RNA.regulation of transcription.bZIP transcription factor family	i1_HQ_LWC_c16298/f4p0/1866	Transcript	weakly similar to ( 148) AT1G58110 | Symbols: | bZIP family transcription factor | chr1:21515919-21517374 REVERSE protein|bZIP transcription factor domain containing protein, expressed	5.00943
27.3.35	RNA.regulation of transcription.bZIP transcription factor family	i1_LQ_LWC_c8193/f1p5/1661	Transcript	weakly similar to ( 176) AT1G06070 | Symbols: | bZIP transcription factor, putative (bZIP69) | chr1:1835201-1837116 REVERSEmoderately similar to ( 303) RF2A_ORYSA Transcription factor RF2a - Oryza sativa (Rice) protein|transcription factor RF2a, putative, expressed	3.62144
27.3.35	RNA.regulation of transcription.bZIP transcription factor family	i2_LQ_LWC_c64158/f1p0/2409	Transcript	moderately similar to ( 367) AT1G08320 | Symbols: | bZIP family transcription factor | chr1:2622113-2627451 REVERSEmoderately similar to ( 316) TGA21_TOBAC TGACG-sequence-specific DNA-binding protein TGA-2.1 (TGA2.1) - Nicotiana tabacum (Common tobacco) protein|transcription factor, putative, expressed	3.83455
27.3.35	RNA.regulation of transcription.bZIP transcription factor family	i1_LQ_LWC_c24325/f1p0/1907	Transcript	moderately similar to ( 375) AT3G12250 | Symbols: TGA6, BZIP45 | TGA6 (TGACG MOTIF-BINDING FACTOR 6); DNA binding / transcription factor | chr3:3906636-3908583 FORWARDhighly similar to ( 575) HBP1C_WHEAT Transcription factor HBP-1b(c1) (Fragment) - Triticum aestivum (Wheat) protein|transcription factor, putative, expressed	-4.56013
27.3.35	RNA.regulation of transcription.bZIP transcription factor family	i1_LQ_LWC_c12688/f1p0/1600	Transcript	weakly similar to ( 200) AT2G40620 | Symbols: | bZIP transcription factor family protein | chr2:16954804-16956872 REVERSEmoderately similar to ( 394) RF2B_ORYSA Transcription factor RF2b - Oryza sativa (Rice) protein|bZIP transcription factor family protein, putative, expressed	9.13946
27.3.35	RNA.regulation of transcription.bZIP transcription factor family	i1_LQ_LWC_c10385/f1p1/1974	Transcript	moderately similar to ( 273) AT1G08320 | Symbols: | bZIP family transcription factor | chr1:2622113-2627451 REVERSEmoderately similar to ( 227) HBP1C_WHEAT Transcription factor HBP-1b(c1) (Fragment) - Triticum aestivum (Wheat) protein|transcription factor, putative, expressed	2.71799
27.3.35	RNA.regulation of transcription.bZIP transcription factor family	i2_LQ_LWC_c92997/f1p0/2068	Transcript	moderately similar to ( 375) AT1G08320 | Symbols: | bZIP family transcription factor | chr1:2622113-2627451 REVERSEmoderately similar to ( 330) TGA21_TOBAC TGACG-sequence-specific DNA-binding protein TGA-2.1 (TGA2.1) - Nicotiana tabacum (Common tobacco) protein|transcription factor, putative, expressed	11.8875
27.3.35	RNA.regulation of transcription.bZIP transcription factor family	i1_LQ_LWC_c8757/f1p0/2016	Transcript	moderately similar to ( 254) AT3G60320 | Symbols: | DNA binding | chr3:22292073-22295228 REVERSEDUF632 protein|DUF630/DUF632 domains containing protein, putative, expressed	-5.99405
27.3.35	RNA.regulation of transcription.bZIP transcription factor family	i4_LQ_LWC_c40608/f1p0/4037	Transcript	moderately similar to ( 345) AT1G21740 | Symbols: | unknown protein | chr1:7641580-7645078 FORWARDDUF632 protein|DUF630/DUF632 domains containing protein, putative, expressed	0
27.3.35	RNA.regulation of transcription.bZIP transcription factor family	i1_LQ_LWC_c38263/f1p0/1326	Transcript	very weakly similar to (91.3) AT2G41070 | Symbols: EEL, ATBZIP12, DPBF4 | EEL (ENHANCED EM LEVEL); DNA binding / transcription factor | chr2:17131249-17132208 FORWARD protein|bZIP transcription factor domain containing protein, expressed	5.66649
27.3.35	RNA.regulation of transcription.bZIP transcription factor family	i1_HQ_LWC_c23518/f2p3/1737	Transcript	moderately similar to ( 206) AT1G32150 | Symbols: | bZIP transcription factor family protein | chr1:11566022-11568317 FORWARDweakly similar to ( 154) HBP1A_WHEAT Transcription factor HBP-1a (Histone-specific transcription factor HBP1) - Triticum aestivum (Wheat)MFMR BRLZ bZIP_1 protein|transcription factor, putative, expressed	1.6412
27.3.35	RNA.regulation of transcription.bZIP transcription factor family	i2_LQ_LWC_c105440/f1p0/2560	Transcript	weakly similar to ( 197) AT4G35040 | Symbols: | bZIP transcription factor family protein | chr4:16680821-16681805 FORWARD protein|E2F-related protein, putative, expressed	10.6033
27.3.35	RNA.regulation of transcription.bZIP transcription factor family	i1_LQ_LWC_c14048/f1p0/1449	Transcript	weakly similar to ( 117) AT5G28770 | Symbols: BZO2H3 | BZO2H3; DNA binding / protein heterodimerization/ transcription factor | chr5:10796907-10798147 REVERSEweakly similar to ( 166) CPRF2_PETCR Light-inducible protein CPRF-2 - Petroselinum crispum (Parsley) (Petroselinum hortense) protein|bZIP transcription factor domain containing protein, expressed	-3.62283
27.3.35	RNA.regulation of transcription.bZIP transcription factor family	i1_HQ_LWC_c2355/f7p4/1991	Transcript	weakly similar to ( 146) AT2G35530 | Symbols: | bZIP transcription factor family protein | chr2:14923280-14926025 REVERSEvery weakly similar to (87.8) HBP1A_WHEAT Transcription factor HBP-1a (Histone-specific transcription factor HBP1) - Triticum aestivum (Wheat)MFMR BRLZ bZIP_1 protein|transcription factor, putative, expressed	11.0953
27.3.35	RNA.regulation of transcription.bZIP transcription factor family	i1_LQ_LWC_c36383/f1p2/1900	Transcript	moderately similar to ( 338) AT5G06839 | Symbols: | bZIP family transcription factor | chr5:2120911-2126217 FORWARDmoderately similar to ( 300) TGA21_TOBAC TGACG-sequence-specific DNA-binding protein TGA-2.1 (TGA2.1) - Nicotiana tabacum (Common tobacco) protein|transcription factor, putative, expressed	-1.6207
27.3.36	RNA.regulation of transcription.Argonaute	i3_LQ_LWC_c28556/f1p2/3938	Transcript	nearly identical (1191) AT2G27040 | Symbols: AGO4, OCP11 | AGO4 (ARGONAUTE 4); nucleic acid binding | chr2:11536795-11541503 REVERSE Piwi_ago-like Piwi Piwi_piwi-like_Euk Piwi-like PAZ PAZ_argonaute_like DUF1785 protein|argonaute, putative, expressed	-10.1423
27.3.37	RNA.regulation of transcription.AS2,Lateral Organ Boundaries Gene Family	i1_LQ_LWC_c21062/f1p6/1435	Transcript	moderately similar to ( 204) AT3G02550 | Symbols: LBD41 | LBD41 (LOB DOMAIN-CONTAINING PROTEIN 41) | chr3:536747-537650 REVERSEDUF260 protein|DUF260 domain containing protein, putative, expressed	3.54123
27.3.37	RNA.regulation of transcription.AS2,Lateral Organ Boundaries Gene Family	i0_LQ_LWC_c1336/f1p3/780	Transcript	weakly similar to ( 157) AT3G58190 | Symbols: LBD29, ASL16 | LBD29 (LATERAL ORGAN BOUNDARIES-DOMAIN 29) | chr3:21548716-21549488 REVERSEDUF260 protein|DUF260 domain containing protein, putative, expressed	-5.46605
27.3.37	RNA.regulation of transcription.AS2,Lateral Organ Boundaries Gene Family	i4_LQ_LWC_c33039/f1p0/4226	Transcript	moderately similar to ( 202) AT2G30130 | Symbols: ASL5, LBD12, PCK1 | ASL5; DNA binding / protein binding | chr2:12868740-12869684 FORWARDDUF260 protein|DUF260 domain containing protein, putative, expressed	-1.45399
27.3.37	RNA.regulation of transcription.AS2,Lateral Organ Boundaries Gene Family	i2_HQ_LWC_c18361/f2p0/2321	Transcript	weakly similar to ( 150) AT2G30130 | Symbols: ASL5, LBD12, PCK1 | ASL5; DNA binding / protein binding | chr2:12868740-12869684 FORWARDDUF260 protein|DUF260 domain containing protein, putative, expressed	-10.8817
27.3.37	RNA.regulation of transcription.AS2,Lateral Organ Boundaries Gene Family	i1_LQ_LWC_c34590/f1p4/1396	Transcript	weakly similar to ( 174) AT5G67420 | Symbols: LBD37 | LBD37 (LOB DOMAIN-CONTAINING PROTEIN 37) | chr5:26904576-26905415 REVERSEDUF260 protein|DUF260 domain containing protein, putative, expressed	6.07872
27.3.37	RNA.regulation of transcription.AS2,Lateral Organ Boundaries Gene Family	i1_LQ_LWC_c30206/f1p0/1839	Transcript	weakly similar to ( 174) AT5G66870 | Symbols: ASL1, LBD36 | ASL1 | chr5:26706621-26707562 FORWARDDUF260 protein|DUF260 domain containing protein, putative, expressed	3.1843
27.3.38	RNA.regulation of transcription.AT-rich interaction domain containing transcription factor family	i1_HQ_LWC_c2297/f2p0/1834	Transcript	moderately similar to ( 340) AT2G17410 | Symbols: | ARID/BRIGHT DNA-binding domain-containing protein | chr2:7559869-7563474 FORWARD BRIGHT protein|ARID/BRIGHT DNA-binding domain-containing protein, putative, expressed	2.8113
27.3.39	RNA.regulation of transcription.AtSR Transcription Factor family	i2_LQ_LWC_c12054/f1p3/2674	Transcript	moderately similar to ( 335) AT1G67310 | Symbols: | calmodulin binding / transcription regulator | chr1:25198182-25203126 REVERSE CG-1 protein|calmodulin-binding transcription activator, putative, expressed	0
27.3.39	RNA.regulation of transcription.AtSR Transcription Factor family	i1_LQ_LWC_c20161/f1p0/1837	Transcript	moderately similar to ( 451) AT1G67310 | Symbols: | calmodulin binding / transcription regulator | chr1:25198182-25203126 REVERSE CG-1 protein|calmodulin-binding transcription activator 4, putative, expressed	10.295
27.3.39	RNA.regulation of transcription.AtSR Transcription Factor family	i1_HQ_LWC_c27843/f6p0/1453	Transcript	weakly similar to ( 195) AT2G17390 | Symbols: AKR2B | AKR2B (ANKYRIN REPEAT-CONTAINING 2B); protein binding / transcription regulator | chr2:7555870-7557743 FORWARD protein|ankyrin repeat domain containing protein, putative, expressed	10.0639
27.3.40	RNA.regulation of transcription.Aux/IAA family	i1_HQ_LWC_c16504/f2p0/1443	Transcript	moderately similar to ( 223) AT4G14550 | Symbols: IAA14, SLR | IAA14 (INDOLE-3-ACETIC ACID INDUCIBLE 14); protein binding / transcription factor/ transcription repressor | chr4:8348521-8349923 REVERSEmoderately similar to ( 343) IAA30_ORYSA Auxin-responsive protein IAA30 (Indoleacetic acid-induced protein 30) - Oryza sativa (Rice)AUX_IAA protein|OsIAA30 - Auxin-responsive Aux/IAA gene family memb…	9.29543
27.3.40	RNA.regulation of transcription.Aux/IAA family	i2_LQ_LWC_c72386/f1p0/2285	Transcript	weakly similar to ( 169) IAA15_ORYSA Auxin-responsive protein IAA15 (Indoleacetic acid-induced protein 15) - Oryza sativa (Rice)AUX_IAA protein|OsIAA15 - Auxin-responsive Aux/IAA gene family member, expressed	12.4243
27.3.40	RNA.regulation of transcription.Aux/IAA family	i1_LQ_LWC_c5752/f1p3/1493	Transcript	weakly similar to ( 166) AT1G04240 | Symbols: SHY2, IAA3 | SHY2 (SHORT HYPOCOTYL 2); transcription factor | chr1:1128564-1129319 REVERSEmoderately similar to ( 296) IAA31_ORYSA Auxin-responsive protein IAA31 (Indoleacetic acid-induced protein 31) - Oryza sativa (Rice)AUX_IAA protein|OsIAA31 - Auxin-responsive Aux/IAA gene family member, expressed	0.963599
27.3.40	RNA.regulation of transcription.Aux/IAA family	i1_LQ_LWC_c37824/f1p0/1259	Transcript	weakly similar to ( 161) AT2G33310 | Symbols: IAA13 | IAA13; transcription factor | chr2:14114569-14115757 REVERSEmoderately similar to ( 406) IAA10_ORYSA Auxin-responsive protein IAA10 (Indoleacetic acid-induced protein 10) - Oryza sativa (Rice)AUX_IAA protein|OsIAA10 - Auxin-responsive Aux/IAA gene family member, expressed	12.7524
27.3.40	RNA.regulation of transcription.Aux/IAA family	i0_LQ_LWC_c1479/f1p3/962	Transcript	weakly similar to ( 164) AT1G04250 | Symbols: AXR3, IAA17 | AXR3 (AUXIN RESISTANT 3); transcription factor | chr1:1136382-1138340 FORWARDmoderately similar to ( 265) IAA1_ORYSA Auxin-responsive protein IAA1 (Indoleacetic acid-induced protein 1) - Oryza sativa (Rice)AUX_IAA protein|OsIAA1 - Auxin-responsive Aux/IAA gene family member, expressed	-4.22415
27.3.40	RNA.regulation of transcription.Aux/IAA family	i1_LQ_LWC_c42458/f1p0/1095	Transcript	weakly similar to ( 128) AT1G04240 | Symbols: SHY2, IAA3 | SHY2 (SHORT HYPOCOTYL 2); transcription factor | chr1:1128564-1129319 REVERSEmoderately similar to ( 242) IAA14_ORYSA Auxin-responsive protein IAA14 (Indoleacetic acid-induced protein 14) - Oryza sativa (Rice)AUX_IAA protein|OsIAA14 - Auxin-responsive Aux/IAA gene family member, expressed	13.1161
27.3.41	RNA.regulation of transcription.B3 transcription factor family	i2_LQ_LWC_c107933/f1p0/2180	Transcript	weakly similar to ( 132) AT5G58280 | Symbols: | transcriptional factor B3 family protein | chr5:23567338-23568670 FORWARD protein|B3 DNA binding domain containing protein, expressed	0
27.3.42	RNA.regulation of transcription.Bromodomain proteins	i2_LQ_LWC_c3635/f1p2/2660	Transcript	weakly similar to ( 160) AT1G58025 | Symbols: | DNA binding | chr1:21458219-21461757 REVERSE protein|bromodomain domain containing protein, expressed	-5.99703
27.3.44	RNA.regulation of transcription.Chromatin Remodeling Factors	i2_LQ_LWC_c25702/f1p0/2350	Transcript	highly similar to ( 832) AT1G50410 | Symbols: | SNF2 domain-containing protein / helicase domain-containing protein / RING finger domain-containing protein | chr1:18672828-18677365 FORWARDvery weakly similar to (84.0) ISW2_ORYSA Probable chromatin remodelling complex ATPase chain (EC 3.6.1.-) (ISW2-like) (Sucrose nonfermenting protein 2 homolog) - Oryza sativa (Rice) HepA SNF2_N HELICc protein|ED…	-5.7987
27.3.44	RNA.regulation of transcription.Chromatin Remodeling Factors	i3_LQ_LWC_c24449/f1p4/3512	Transcript	nearly identical (1295) AT3G54460 | Symbols: | SNF2 domain-containing protein / helicase domain-containing protein / F-box family protein | chr3:20162050-20167186 REVERSE SNF2_N HepA protein|OsFBO7 - F-box and other domain containing protein, expressed	-4.04561
27.3.44	RNA.regulation of transcription.Chromatin Remodeling Factors	i1_LQ_LWC_c7282/f1p2/1714	Transcript	moderately similar to ( 239) AT3G17590 | Symbols: BSH, CHE1 | BSH (BUSHY GROWTH); chromatin binding / protein binding | chr3:6017313-6019591 REVERSE protein|SWI/SNF-related matrix-associated actin-dependent regulator of chromatin subfamily B member 1, putative, expressed	1.59644
27.3.44	RNA.regulation of transcription.Chromatin Remodeling Factors	i2_LQ_LWC_c109124/f1p0/2468	Transcript	highly similar to ( 868) AT1G48310 | Symbols: CHR18, CHA18 | CHR18; ATP binding / DNA binding / helicase/ nucleic acid binding | chr1:17848620-17853731 REVERSEweakly similar to ( 128) ISW2_ORYSA Probable chromatin remodelling complex ATPase chain (EC 3.6.1.-) (ISW2-like) (Sucrose nonfermenting protein 2 homolog) - Oryza sativa (Rice) HepA SNF2_N HELICc protein|SNF2 family N-terminal domain contai…	-10.2704
27.3.44	RNA.regulation of transcription.Chromatin Remodeling Factors	i1_LQ_LWC_c35616/f1p5/1863	Transcript	moderately similar to ( 246) AT4G22360 | Symbols: | SWIB complex BAF60b domain-containing protein | chr4:11807811-11809660 FORWARD SWIB SWIB COG5531 PRK06319 protein|SWIB/MDM2 domain containing protein, expressed	8.82861
27.3.44	RNA.regulation of transcription.Chromatin Remodeling Factors	i2_LQ_LWC_c6188/f1p0/2885	Transcript	highly similar to ( 803) AT5G05130 | Symbols: | SNF2 domain-containing protein / helicase domain-containing protein / RING finger domain-containing protein | chr5:1512173-1514918 FORWARDvery weakly similar to (94.0) ISW2_ORYSA Probable chromatin remodelling complex ATPase chain (EC 3.6.1.-) (ISW2-like) (Sucrose nonfermenting protein 2 homolog) - Oryza sativa (Rice) HepA SNF2_N HELICc protein|SWI/…	9.34506
27.3.44	RNA.regulation of transcription.Chromatin Remodeling Factors	i1_HQ_LWC_c22833/f2p8/1876	Transcript	highly similar to ( 552) AT5G14170 | Symbols: CHC1 | CHC1 | chr5:4568696-4570444 REVERSE SWIB SWIB protein|SWIB/MDM2 domain containing protein, expressed	3.42331
27.3.44	RNA.regulation of transcription.Chromatin Remodeling Factors	i4_LQ_LWC_c4106/f1p0/4733	Transcript	weakly similar to ( 171) AT2G40770 | Symbols: | ATP binding / DNA binding / helicase/ nucleic acid binding / protein binding / zinc ion binding | chr2:17013535-17021315 REVERSE protein|helicase conserved C-terminal domain containing protein, expressed	8.96043
27.3.44	RNA.regulation of transcription.Chromatin Remodeling Factors	i1_LQ_LWC_c33428/f1p5/1736	Transcript	moderately similar to ( 204) AT4G22360 | Symbols: | SWIB complex BAF60b domain-containing protein | chr4:11807811-11809660 FORWARD SWIB SWIB COG5531 protein|SWIB/MDM2 domain containing protein, expressed	-11.5322
27.3.44	RNA.regulation of transcription.Chromatin Remodeling Factors	i2_LQ_LWC_c33039/f1p0/2514	Transcript	moderately similar to ( 243) AT4G22140 | Symbols: | DNA binding / protein binding / zinc ion binding | chr4:11728093-11730230 REVERSE BAH_BAHCC1 BAH BAH BAH protein|ES43 protein, putative, expressed	5.65013
27.3.44	RNA.regulation of transcription.Chromatin Remodeling Factors	i2_LQ_LWC_c68800/f1p0/2799	Transcript	moderately similar to ( 474) AT1G21700 | Symbols: ATSWI3C, CHB4 | ATSWI3C (SWITCH/SUCROSE NONFERMENTING 3C); DNA binding | chr1:7620156-7623978 REVERSE RSC8 protein|SWIRM domain containing protein, expressed	-3.74959
27.3.44	RNA.regulation of transcription.Chromatin Remodeling Factors	i3_LQ_LWC_c37417/f1p0/3967	Transcript	highly similar to ( 905) AT5G07810 | Symbols: | SNF2 domain-containing protein / helicase domain-containing protein / HNH endonuclease domain-containing protein | chr5:2491412-2498484 REVERSE HepA SNF2_N DEXDc DEXHc protein|SNF2 domain-containing protein, putative, expressed	8.85414
27.3.44	RNA.regulation of transcription.Chromatin Remodeling Factors	i2_LQ_LWC_c106222/f1p0/2192	Transcript	moderately similar to ( 284) AT4G22140 | Symbols: | DNA binding / protein binding / zinc ion binding | chr4:11728093-11730230 REVERSE BAH_BAHCC1 BAH BAH protein|ES43 protein, putative, expressed	5.05013
27.3.44	RNA.regulation of transcription.Chromatin Remodeling Factors	i2_LQ_LWC_c36549/f1p2/2971	Transcript	highly similar to ( 808) AT2G02090 | Symbols: CHR19, CHA19, ETL1 | ETL1; ATP binding / DNA binding / helicase/ nucleic acid binding | chr2:523481-526884 FORWARDweakly similar to ( 173) ISW2_ORYSA Probable chromatin remodelling complex ATPase chain (EC 3.6.1.-) (ISW2-like) (Sucrose nonfermenting protein 2 homolog) - Oryza sativa (Rice) SNF2_N HepA DEXDc protein|SNF2 family N-terminal domain contai…	-8.41504
27.3.46	RNA.regulation of transcription.DNA methyltransferases	i1_LQ_LWC_c11173/f1p0/1531	Transcript	moderately similar to ( 321) AT5G25480 | Symbols: DNMT2 | DNMT2 (DNA METHYLTRANSFERASE-2); DNA binding | chr5:8870069-8872199 REVERSE Cyt_C5_DNA_methylase Dcm DNA_methylase protein|C-5 cytosine-specific DNA methylase, putative, expressed	3.33937
27.3.48	RNA.regulation of transcription.FHA transcription factor	i1_HQ_LWC_c2312/f2p0/1611	Transcript	moderately similar to ( 378) AT3G07220 | Symbols: | transcriptional activator, putative | chr3:2297968-2299407 FORWARD protein|FHA domain containing protein, putative, expressed	1.25196
27.3.49	RNA.regulation of transcription.GeBP like	i2_LQ_LWC_c88563/f1p0/2919	Transcript	weakly similar to ( 120) AT3G04930 | Symbols: | transcription regulator | chr3:1363029-1364399 FORWARDDUF573 protein|transcription regulator, putative, expressed	10.6525
27.3.50	RNA.regulation of transcription.General Transcription	i1_HQ_LWC_c2442/f6p1/1596	Transcript	moderately similar to ( 217) AT1G07480 | Symbols: | transcription factor IIA large subunit / TFIIA large subunit (TFIIA-L) | chr1:2296706-2299215 REVERSE TFIIA protein|transcription factor IIA large subunit, putative, expressed	1.27571
27.3.50	RNA.regulation of transcription.General Transcription	i2_LQ_LWC_c106738/f1p0/2632	Transcript	weakly similar to ( 192) AT1G73230 | Symbols: | nascent polypeptide-associated complex (NAC) domain-containing protein | chr1:27540506-27541364 REVERSE protein|transcription factor BTF3, putative, expressed	22.6621
27.3.50	RNA.regulation of transcription.General Transcription	i2_LQ_LWC_c109080/f1p1/2187	Transcript	weakly similar to ( 172) AT4G35540 | Symbols: | transcription regulator/ zinc ion binding | chr4:16873939-16875522 FORWARD protein|zinc ion binding protein, putative, expressed	10.1627
27.3.50	RNA.regulation of transcription.General Transcription	i2_LQ_LWC_c85016/f1p2/2037	Transcript	weakly similar to ( 120) AT4G37740 | Symbols: AtGRF2 | AtGRF2 (GROWTHREGULATING FACTOR 2); transcription activator | chr4:17725533-17727609 REVERSEWRC protein|growth regulating factor protein, putative, expressed	0
27.3.50	RNA.regulation of transcription.General Transcription	i1_LQ_LWC_c30106/f1p0/1835	Transcript	moderately similar to ( 203) AT1G17880 | Symbols: | nascent polypeptide-associated complex (NAC) domain-containing protein / BTF3b-like transcription factor, putative | chr1:6152572-6153425 REVERSE protein|transcription factor BTF3, putative, expressed	3.96681
27.3.50	RNA.regulation of transcription.General Transcription	i1_LQ_LWC_c25950/f1p4/1334	Transcript	weakly similar to ( 173) AT1G17880 | Symbols: | nascent polypeptide-associated complex (NAC) domain-containing protein / BTF3b-like transcription factor, putative | chr1:6152572-6153425 REVERSE protein|transcription factor BTF3, putative, expressed	0.968976
27.3.50	RNA.regulation of transcription.General Transcription	i1_HQ_LWC_c12610/f3p1/1807	Transcript	weakly similar to ( 167) AT3G13940 | Symbols: | DNA binding / DNA-directed RNA polymerase | chr3:4600647-4602412 REVERSE RNA_pol_I_A49 protein|A49-like RNA polymerase I associated factor family protein, expressed	9.79719
27.3.52	RNA.regulation of transcription.Global transcription factor group	i2_HQ_LWC_c53618/f4p0/2173	Transcript	weakly similar to ( 112) AT1G06230 | Symbols: GTE4 | GTE4 (GLOBAL TRANSCRIPTION FACTOR GROUP E 4); DNA binding | chr1:1907626-1910183 FORWARD protein|bromodomain containing protein, expressed	10.4634
27.3.52	RNA.regulation of transcription.Global transcription factor group	i1_HQ_LWC_c21954/f5p1/1914	Transcript	weakly similar to ( 152) AT1G73150 | Symbols: GTE3 | GTE3 (GLOBAL TRANSCRIPTION FACTOR GROUP E 3); DNA binding / histone binding | chr1:27504327-27505996 REVERSE BROMO Bromodomain protein|bromodomain containing protein, expressed	-1.60443
27.3.52	RNA.regulation of transcription.Global transcription factor group	i1_LQ_LWC_c18844/f1p0/2015	Transcript	weakly similar to ( 107) AT5G65630 | Symbols: GTE7 | GTE7 (Global transcription factor group E 7); DNA binding | chr5:26226311-26228257 REVERSE BROMO Bromodomain protein|bromodomain containing protein, expressed	-4.86473
27.3.54	RNA.regulation of transcription.Histone acetyltransferases	i1_LQ_LWC_c31342/f1p5/1664	Transcript	moderately similar to ( 399) AT5G56740 | Symbols: HAG2, HAC7, HAG02, HAC07 | HAG2 (HISTONE ACETYLTRANSFERASE OF THE GNAT FAMILY 2); H4 histone acetyltransferase/ histone acetyltransferase | chr5:22953009-22955577 REVERSEhighly similar to ( 927) HAT1_ORYSA Probable acetyltransferase type B catalytic subunit (EC 2.3.1.48) (HAT B) - Oryza sativa (Rice) protein|acetyltransferase type B catalytic subu…	1.94278
27.3.54	RNA.regulation of transcription.Histone acetyltransferases	i2_LQ_LWC_c88775/f1p1/2741	Transcript	highly similar to ( 695) AT5G64610 | Symbols: HAM1 | HAM1 (HISTONE ACETYLTRANSFERASE OF THE MYST FAMILY 1); H3/H4 histone acetyltransferase/ histone acetyltransferase/ nucleic acid binding / zinc ion binding | chr5:25828333-25830503 REVERSEhighly similar to ( 761) MYST1_ORYSA Putative MYST-like histone acetyltransferase 1 (EC 2.3.1.48) - Oryza sativa (Rice) SAS2 MOZ_SAS protein|MYST-like histone …	10.7856
27.3.54	RNA.regulation of transcription.Histone acetyltransferases	i2_LQ_LWC_c48203/f1p29/2189	Transcript	highly similar to ( 676) AT1G79000 | Symbols: HAC1, PCAT2, ATHPCAT2 | HAC1 (HISTONE ACETYLTRANSFERASE OF THE CBP FAMILY 1); H3/H4 histone acetyltransferase/ histone acetyltransferase/ transcription cofactor | chr1:29716933-29723984 REVERSE DUF906 protein|histone acetyltransferase HAC5, putative, expressed	8.75687
27.3.54	RNA.regulation of transcription.Histone acetyltransferases	i3_LQ_LWC_c20286/f1p0/3691	Transcript	highly similar to ( 780) AT1G79000 | Symbols: HAC1, PCAT2, ATHPCAT2 | HAC1 (HISTONE ACETYLTRANSFERASE OF THE CBP FAMILY 1); H3/H4 histone acetyltransferase/ histone acetyltransferase/ transcription cofactor | chr1:29716933-29723984 REVERSE DUF906 protein|TAZ zinc finger family protein, expressed	0
27.3.54	RNA.regulation of transcription.Histone acetyltransferases	i1_LQ_LWC_c30713/f1p0/1915	Transcript	highly similar to ( 508) AT4G16420 | Symbols: ADA2B, PRZ1 | ADA2B (HOMOLOG OF YEAST ADA2 2B); DNA binding / transcription coactivator/ transcription factor | chr4:9262805-9265775 REVERSE COG5114 ZZ_ADA2 protein|transcriptional adaptor, putative, expressed	9.63484
27.3.55	RNA.regulation of transcription.HDA	i1_LQ_LWC_c36399/f1p0/1992	Transcript	highly similar to ( 565) AT4G33470 | Symbols: hda14, ATHDA14 | hda14 (histone deacetylase 14); histone deacetylase | chr4:16102774-16105439 REVERSEvery weakly similar to (83.2) HDAC_MAIZE Probable histone deacetylase (RPD3 homolog) - Zea mays (Maize) AcuC Hist_deacetyl protein|histone deacetylase, putative, expressed	6.07808
27.3.55	RNA.regulation of transcription.HDA	i2_LQ_LWC_c35305/f1p0/2693	Transcript	moderately similar to ( 418) AT1G08460 | Symbols: HDA08, HDA8, ATHDA8 | HDA08; histone deacetylase | chr1:2672527-2674469 FORWARDvery weakly similar to (99.8) HDAC_MAIZE Probable histone deacetylase (RPD3 homolog) - Zea mays (Maize) AcuC Hist_deacetyl protein|histone deacetylase, putative, expressed	1.97801
27.3.55	RNA.regulation of transcription.HDA	i1_HQ_LWC_c954/f14p0/1728	Transcript	highly similar to ( 648) AT5G63110 | Symbols: HDA6, AXE1, ATHDA6, RTS1, RPD3B, SIL1 | HDA6 (HISTONE DEACETYLASE 6); histone deacetylase | chr5:25315834-25318227 REVERSEhighly similar to ( 534) HDAC_MAIZE Probable histone deacetylase (RPD3 homolog) - Zea mays (Maize) Hist_deacetyl AcuC protein|histone deacetylase, putative, expressed	3.43929
27.3.55	RNA.regulation of transcription.HDA	i1_LQ_LWC_c30967/f1p0/1862	Transcript	highly similar to ( 607) AT3G44680 | Symbols: HDA9, HDA09 | HDA9 (HISTONE DEACETYLASE 9); histone deacetylase | chr3:16226769-16229752 REVERSEmoderately similar to ( 378) HDAC_MAIZE Probable histone deacetylase (RPD3 homolog) - Zea mays (Maize) Hist_deacetyl AcuC protein|histone deacetylase, putative, expressed	4.09009
27.3.55	RNA.regulation of transcription.HDA	i1_LQ_LWC_c26758/f1p0/1171	Transcript	very weakly similar to (86.7) AT5G22650 | Symbols: HD2B, HDT02, HDT2, ATHD2B, HDA4, HD2 | HD2B (HISTONE DEACETYLASE 2B); histone deacetylase | chr5:7534120-7536054 FORWARDweakly similar to ( 173) HD2C_MAIZE Histone deacetylase 2c (HD2c) (Zm-HD2c) - Zea mays (Maize) protein|ZOS5-12 - C2H2 zinc finger protein, expressed	6.76277
27.3.55	RNA.regulation of transcription.HDA	i1_LQ_LWC_c20174/f1p0/1406	Transcript	highly similar to ( 715) AT4G38130 | Symbols: HD1, ATHD1, HDA1, RPD3A, HDA19 | HD1 (HISTONE DEACETYLASE 1); basal transcription repressor/ histone deacetylase/ protein binding | chr4:17896663-17899057 REVERSEhighly similar to ( 758) HDAC_MAIZE Probable histone deacetylase (RPD3 homolog) - Zea mays (Maize) Hist_deacetyl AcuC protein|histone deacetylase 19, putative, expressed	-11.1032
27.3.55	RNA.regulation of transcription.HDA	i2_LQ_LWC_c23548/f1p1/2508	Transcript	moderately similar to ( 447) AT3G18520 | Symbols: HDA15, ATHDA15 | HDA15; histone deacetylase | chr3:6361605-6365399 FORWARDvery weakly similar to (84.7) HDAC_MAIZE Probable histone deacetylase (RPD3 homolog) - Zea mays (Maize) Hist_deacetyl AcuC protein|histone deacetylase, putative, expressed	6.4701
27.3.57	RNA.regulation of transcription.JUMONJI family	i2_LQ_LWC_c36885/f1p1/2675	Transcript	moderately similar to ( 262) AT5G46910 | Symbols: | transcription factor jumonji (jmj) family protein | chr5:19047780-19050880 FORWARD protein|jmjC domain containing protein, expressed	0
27.3.57	RNA.regulation of transcription.JUMONJI family	i2_LQ_LWC_c47046/f1p0/2946	Transcript	highly similar to ( 741) AT4G20400 | Symbols: | transcription factor jumonji (jmj) family protein / zinc finger (C5HC2 type) family protein | chr4:11009753-11013588 FORWARD JmjC JmjC FYRC protein|transcription factor jumonji, putative, expressed	-7.92325
27.3.58	RNA.regulation of transcription.LUG	i2_HQ_LWC_c1668/f13p3/2924	Transcript	highly similar to ( 882) AT2G32700 | Symbols: LUH | WD-40 repeat family protein | chr2:13867235-13871844 FORWARD WD40 COG2319 protein|transcriptional corepressor LEUNIG, putative, expressed	0
27.3.58	RNA.regulation of transcription.LUG	i2_LQ_LWC_c101744/f1p3/2682	Transcript	highly similar to ( 585) AT2G32700 | Symbols: LUH | WD-40 repeat family protein | chr2:13867235-13871844 FORWARD WD40 COG2319 protein|THION30 - Plant thionin family protein precursor, expressed	-9.69354
27.3.59	RNA.regulation of transcription.Methyl binding domain proteins	i1_HQ_LWC_c1745/f3p0/1807	Transcript	protein|methyl-CpG binding domain containing protein, putative, expressed	2.52504
27.3.60	RNA.regulation of transcription.NIN-like bZIP-related family	i2_LQ_LWC_c35859/f1p3/2325	Transcript	highly similar to ( 585) AT4G35270 | Symbols: | RWP-RK domain-containing protein | chr4:16777657-16780824 REVERSERWP-RK PB1 protein|NIN, putative, expressed	3.70001
27.3.62	RNA.regulation of transcription.Nucleosome/chromatin assembly factor group	i1_LQ_LWC_c10016/f1p5/1753	Transcript	moderately similar to ( 260) AT1G04880 | Symbols: | high mobility group (HMG1/2) family protein / ARID/BRIGHT DNA-binding domain-containing protein | chr1:1376106-1378264 REVERSE BRIGHT protein|high mobility group, putative, expressed	-1.54698
27.3.62	RNA.regulation of transcription.Nucleosome/chromatin assembly factor group	i0_LQ_LWC_c1963/f1p0/632	Transcript	very weakly similar to (93.2) AT1G20696 | Symbols: HMGB3, NFD3, NFD03 | HMGB3 (HIGH MOBILITY GROUP B 3); DNA binding / chromatin binding / structural constituent of chromatin / transcription factor | chr1:7179825-7181170 FORWARDvery weakly similar to (99.4) HMGL_IPONI HMG1/2-like protein - Ipomoea nil (Japanese morning glory) (Pharbitis nil) protein|HMG1/2, putative, expressed	9.99937
27.3.62	RNA.regulation of transcription.Nucleosome/chromatin assembly factor group	i2_LQ_LWC_c39209/f1p2/2197	Transcript	highly similar to ( 727) AT3G28730 | Symbols: ATHMG, SSRP1, NFD | ATHMG (ARABIDOPSIS THALIANA HIGH MOBILITY GROUP); transcription factor | chr3:10784954-10788498 FORWARDnearly identical (1130) SSP1B_ORYSA FACT complex subunit SSRP1-B (Facilitates chromatin transcription complex subunit SSRP1-B) (Recombination signal sequence recognition protein 1-B) - Oryza sativa (Rice) SSrecog POB3 Rtt106 HMGB-…	3.7726
27.3.62	RNA.regulation of transcription.Nucleosome/chromatin assembly factor group	i1_HQ_LWC_c5500/f5p0/1953	Transcript	highly similar to ( 540) AT5G64630 | Symbols: FAS2, NFB01, NFB1, MUB3.9 | FAS2 (FASCIATA 2); nucleotide binding / protein binding | chr5:25833298-25836158 FORWARD WD40 protein|WD domain, G-beta repeat domain containing protein, expressed	9.99613
27.3.63	RNA.regulation of transcription.PHD finger transcription factor	i3_LQ_LWC_c5149/f1p2/3431	Transcript	moderately similar to ( 362) AT3G14980 | Symbols: | PHD finger transcription factor, putative | chr3:5039931-5044811 REVERSE protein|PHD finger family protein, putative, expressed	9.08031
27.3.63	RNA.regulation of transcription.PHD finger transcription factor	i2_LQ_LWC_c66154/f1p2/3007	Transcript	moderately similar to ( 244) AT3G53680 | Symbols: | PHD finger transcription factor, putative | chr3:19892863-19897412 REVERSE protein|expressed protein	9.03147
27.3.64	RNA.regulation of transcription.PHOR1	i1_HQ_LWC_c11397/f3p8/1722	Transcript	weakly similar to ( 200) AT5G37490 | Symbols: | U-box domain-containing protein | chr5:14887744-14889051 FORWARDvery weakly similar to (87.0) SPL11_ORYSA Spotted leaf protein 11 (Spotted leaf11) (Cell death-related protein SPL11) - Oryza sativa (Rice)Ubox U-box protein|U-box protein CMPG1, putative, expressed	0
27.3.64	RNA.regulation of transcription.PHOR1	i1_HQ_LWC_c2851/f3p0/1680	Transcript	weakly similar to ( 114) AT3G18710 | Symbols: PUB29, ATPUB29 | PUB29 (PLANT U-BOX 29); ubiquitin-protein ligase | chr3:6434234-6435481 REVERSEUbox U-box protein|U-box protein CMPG1, putative, expressed	2.65206
27.3.65	RNA.regulation of transcription.Polycomb Group (PcG)	i2_LQ_LWC_c35870/f1p0/2865	Transcript	highly similar to ( 771) AT2G23380 | Symbols: CLF, ICU1, SDG1, SET1 | CLF (CURLY LEAF); transcription factor | chr2:9955570-9960117 FORWARDnearly identical (1210) EZ1_MAIZE Polycomb protein EZ1 (Enhancer of zeste protein 1) - Zea mays (Maize) SET SET protein|SET domain containing protein, expressed	3.70471
27.3.65	RNA.regulation of transcription.Polycomb Group (PcG)	i1_HQ_LWC_c2199/f5p0/1764	Transcript	weakly similar to ( 181) AT5G65910 | Symbols: | BSD domain-containing protein | chr5:26361592-26363341 REVERSE protein|BSD domain containing protein, expressed	12.2156
27.3.65	RNA.regulation of transcription.Polycomb Group (PcG)	i1_LQ_LWC_c31462/f1p0/1977	Transcript	moderately similar to ( 246) AT1G79020 | Symbols: | transcription factor-related | chr1:29727282-29730059 REVERSE protein|enhancer of polycomb, putative, expressed	11.7059
27.3.65	RNA.regulation of transcription.Polycomb Group (PcG)	i2_HQ_LWC_c115549/f4p6/2497	Transcript	highly similar to ( 534) AT5G51230 | Symbols: EMF2, VEF2, CYR1 | EMF2 (EMBRYONIC FLOWER 2); DNA binding / transcription factor | chr5:20824153-20829344 FORWARD protein|ZOS9-03 - C2H2 zinc finger protein, expressed	10.0751
27.3.66	RNA.regulation of transcription.Psudo ARR transcription factor family	i2_LQ_LWC_c57791/f1p6/1511	Transcript	moderately similar to ( 350) AT5G02810 | Symbols: PRR7, APRR7 | PRR7 (PSEUDO-RESPONSE REGULATOR 7); transcription regulator/ two-component response regulator | chr5:638283-641461 REVERSEnearly identical (1212) PRR73_ORYSA Two-component response regulator-like PRR73 (Pseudo-response regulator 73) (OsPRR73) - Oryza sativa (Rice)REC REC Response_reg AtoC CheY OmpR protein|response regulator receiver…	14.225
27.3.66	RNA.regulation of transcription.Psudo ARR transcription factor family	i2_LQ_LWC_c127176/f10p3/2738	Transcript	weakly similar to ( 198) AT5G24470 | Symbols: APRR5, PRR5 | APRR5 (ARABIDOPSIS PSEUDO-RESPONSE REGULATOR 5); transcription regulator/ two-component response regulator | chr5:8356204-8358873 REVERSEweakly similar to ( 194) PRR95_ORYSA Two-component response regulator-like PRR95 (Pseudo-response regulator 95) (OsPRR95) - Oryza sativa (Rice)Response_reg REC REC AtoC CheY OmpR protein|response regula…	11.4745
27.3.67	RNA.regulation of transcription.putative transcription regulator	i1_LQ_LWC_c6615/f1p0/1721	Transcript	moderately similar to ( 201) AT2G36740 | Symbols: SWC2, ATSWC2 | SWC2; DNA binding / transcription factor | chr2:15407066-15409430 REVERSE YL1 protein|YL1 nuclear protein C-terminal domain containing protein, expressed	1.45768
27.3.67	RNA.regulation of transcription.putative transcription regulator	i2_LQ_LWC_c105799/f1p0/2416	Transcript	weakly similar to ( 139) AT1G32810 | Symbols: | protein binding / zinc ion binding | chr1:11881810-11885843 FORWARD protein|expressed protein	0
27.3.67	RNA.regulation of transcription.putative transcription regulator	i1_HQ_LWC_c27698/f9p0/1402	Transcript	weakly similar to ( 153) AT3G57540 | Symbols: | remorin family protein | chr3:21301623-21302924 REVERSERemorin_C protein|remorin, putative, expressed	14.7161
27.3.67	RNA.regulation of transcription.putative transcription regulator	i2_LQ_LWC_c48545/f1p0/2914	Transcript	moderately similar to ( 317) AT4G28830 | Symbols: | methyltransferase/ nucleic acid binding | chr4:14232490-14233696 FORWARD COG2263 protein|methyltransferase-like protein 5, putative, expressed	-1.73647
27.3.67	RNA.regulation of transcription.putative transcription regulator	i1_LQ_LWC_c20749/f1p0/1909	Transcript	highly similar to ( 688) AT3G05060 | Symbols: | SAR DNA-binding protein, putative | chr3:1413174-1415564 REVERSE SIK1 Nop NOSIC protein|nucleolar protein NOP5-1, putative, expressed	-9.75051
27.3.67	RNA.regulation of transcription.putative transcription regulator	i1_LQ_LWC_c30380/f1p0/1726	Transcript	moderately similar to ( 407) AT4G21705 | Symbols: | pentatricopeptide (PPR) repeat-containing protein | chr4:11533257-11534817 REVERSE protein|PPR repeat domain containing protein, putative, expressed	9.51236
27.3.67	RNA.regulation of transcription.putative transcription regulator	i2_LQ_LWC_c106738/f1p0/2632	Transcript	weakly similar to ( 192) AT1G73230 | Symbols: | nascent polypeptide-associated complex (NAC) domain-containing protein | chr1:27540506-27541364 REVERSE protein|transcription factor BTF3, putative, expressed	22.6621
27.3.67	RNA.regulation of transcription.putative transcription regulator	i2_LQ_LWC_c8119/f1p3/2288	Transcript	highly similar to ( 504) AT4G09980 | Symbols: EMB1691 | EMB1691 (EMBRYO DEFECTIVE 1691); S-adenosylmethionine-dependent methyltransferase/ methyltransferase/ nucleic acid binding | chr4:6249111-6252030 REVERSEweakly similar to ( 114) MTA70_MEDTR Putative N6-adenosine-methyltransferase MT-A70-like (EC 2.1.1.62) - Medicago truncatula (Barrel medic) MT-A70 IME4 protein|EMB1691, putative, expressed	10.4911
27.3.67	RNA.regulation of transcription.putative transcription regulator	i1_LQ_LWC_c30647/f1p0/1736	Transcript	moderately similar to ( 277) AT2G20710 | Symbols: | pentatricopeptide (PPR) repeat-containing protein | chr2:8926535-8927722 FORWARD protein|pentatricopeptide, putative, expressed	1.31949
27.3.67	RNA.regulation of transcription.putative transcription regulator	i1_LQ_LWC_c11755/f1p0/1614	Transcript	weakly similar to ( 162) AT1G29220 | Symbols: | transcriptional regulator family protein | chr1:10210678-10212571 REVERSEHCNGP protein|transcriptional regulator family protein, putative, expressed	11.0335
27.3.67	RNA.regulation of transcription.putative transcription regulator	i2_HQ_LWC_c7168/f2p3/2735	Transcript	highly similar to ( 630) AT5G60410 | Symbols: ATSIZ1, SIZ1 | SIZ1; DNA binding / SUMO ligase | chr5:24295226-24300792 FORWARD protein|ATSIZ1/SIZ1, putative, expressed	0
27.3.67	RNA.regulation of transcription.putative transcription regulator	i10_LQ_LWC_c40/f1p0/10270	Transcript	nearly identical (1429) AT1G23230 | Symbols: | unknown protein | chr1:8244481-8251741 FORWARD protein|expressed protein	0
27.3.67	RNA.regulation of transcription.putative transcription regulator	i1_LQ_LWC_c3204/f1p4/1942	Transcript	weakly similar to ( 127) AT1G50620 | Symbols: | PHD finger family protein | chr1:18748537-18751005 FORWARDBAH protein|BAH domain containing protein, expressed	-4.93864
27.3.67	RNA.regulation of transcription.putative transcription regulator	i1_LQ_LWC_c7214/f1p0/1923	Transcript	moderately similar to ( 349) AT1G19340 | Symbols: | methyltransferase MT-A70 family protein | chr1:6684798-6686798 FORWARD MT-A70 protein|MT-A70 domain containing protein, expressed	-7.99209
27.3.67	RNA.regulation of transcription.putative transcription regulator	i1_LQ_LWC_c14293/f1p13/1140	Transcript	weakly similar to ( 132) AT2G45430 | Symbols: | DNA-binding protein-related | chr2:18727848-18728801 FORWARDDUF296 protein|DNA binding protein, putative, expressed	-1.21947
27.3.67	RNA.regulation of transcription.putative transcription regulator	i2_LQ_LWC_c53819/f1p0/2503	Transcript	highly similar to ( 728) AT5G05660 | Symbols: ATNFXL2 | ATNFXL2; protein binding / transcription factor/ zinc ion binding | chr5:1691113-1695464 REVERSE protein|NF-X1-type zinc finger protein, putative, expressed	-3.34526
27.3.67	RNA.regulation of transcription.putative transcription regulator	i1_LQ_LWC_c26801/f1p0/1298	Transcript	weakly similar to ( 144) AT2G33620 | Symbols: | DNA-binding family protein / AT-hook protein 1 (AHP1) | chr2:14234749-14236563 FORWARDDUF296 protein|AT hook motif domain containing protein, expressed	1.59684
27.3.67	RNA.regulation of transcription.putative transcription regulator	i2_HQ_LWC_c46825/f3p0/2668	Transcript	moderately similar to ( 444) AT4G15020 | Symbols: | DNA binding / protein dimerization | chr4:8575806-8578372 FORWARDDUF659 zf-C2HC_plant protein|transposon protein, putative, unclassified, expressed	0
27.3.67	RNA.regulation of transcription.putative transcription regulator	i2_LQ_LWC_c42971/f1p1/2060	Transcript	weakly similar to ( 164) AT1G44770 | Symbols: | unknown protein | chr1:16907834-16909409 REVERSE protein|expressed protein	3.14014
27.3.67	RNA.regulation of transcription.putative transcription regulator	i2_LQ_LWC_c43075/f1p1/2058	Transcript	moderately similar to ( 399) AT4G02560 | Symbols: LD | LD (luminidependens); transcription factor | chr4:1123656-1128252 REVERSE protein|homeobox domain containing protein, expressed	9.14728
27.3.67	RNA.regulation of transcription.putative transcription regulator	i0_LQ_LWC_c687/f1p0/986	Transcript	highly similar to ( 608) AT1G51540 | Symbols: | INVOLVED IN: biological_process unknown; LOCATED IN: Golgi apparatus; EXPRESSED IN: 22 plant structures; EXPRESSED DURING: 13 growth stages; CONTAINS InterPro DOMAIN/s: Galactose oxidase/kelch, beta-propeller (InterPro:IPR011043), Kelch repeat type 1 (InterPro:IPR006652), Kelch repeat type 2 (InterPro:IPR011498), Kelch related (InterPro:IPR013089), …	1.54504
27.3.67	RNA.regulation of transcription.putative transcription regulator	i2_LQ_LWC_c103477/f1p2/2749	Transcript	moderately similar to ( 257) AT5G61150 | Symbols: VIP4 | VIP4 (VERNALIZATION INDEPENDENCE 4); protein binding | chr5:24603846-24607528 REVERSE Leo1 protein|VIP4, putative, expressed	0
27.3.67	RNA.regulation of transcription.putative transcription regulator	i2_LQ_LWC_c54262/f1p0/2839	Transcript	weakly similar to ( 144) AT4G12080 | Symbols: | DNA-binding family protein | chr4:7239466-7241246 FORWARDDUF296 protein|AT hook motif domain containing protein, expressed	11.9959
27.3.67	RNA.regulation of transcription.putative transcription regulator	i2_HQ_LWC_c88711/f2p11/2621	Transcript	nearly identical (1900) AT2G26780 | Symbols: | binding | chr2:11410125-11423598 FORWARD protein|HEAT repeat family protein, putative, expressed	11.2249
27.3.67	RNA.regulation of transcription.putative transcription regulator	i1_LQ_LWC_c17871/f1p0/1750	Transcript	weakly similar to ( 152) AT4G12080 | Symbols: | DNA-binding family protein | chr4:7239466-7241246 FORWARDDUF296 protein|AT hook motif domain containing protein, expressed	1.10259
27.3.67	RNA.regulation of transcription.putative transcription regulator	i1_LQ_LWC_c13854/f1p0/1418	Transcript	moderately similar to ( 364) AT5G09450 | Symbols: | pentatricopeptide (PPR) repeat-containing protein | chr5:2941864-2943324 FORWARD protein|pentatricopeptide, putative, expressed	-2.11378
27.3.67	RNA.regulation of transcription.putative transcription regulator	i1_LQ_LWC_c26711/f1p0/1266	Transcript	very weakly similar to (85.5) AT1G20220 | Symbols: | nucleic acid binding | chr1:7005090-7007285 REVERSE protein|protein of unknown function domain containing protein, expressed	12.833
27.3.67	RNA.regulation of transcription.putative transcription regulator	i2_LQ_LWC_c50882/f1p0/2557	Transcript	moderately similar to ( 340) AT2G19330 | Symbols: | leucine-rich repeat family protein | chr2:8372947-8374453 FORWARD COG4886 protein|leucine rich repeat containing protein, expressed	13.596
27.3.67	RNA.regulation of transcription.putative transcription regulator	i2_LQ_LWC_c19093/f1p1/2797	Transcript	highly similar to ( 630) AT4G25730 | Symbols: | FtsJ-like methyltransferase family protein | chr4:13102906-13106718 REVERSE FtsJ FtsJ Spb1_C rrmJ protein|ribosomal RNA large subunit methyltransferase J, putative, expressed	2.9778
27.3.67	RNA.regulation of transcription.putative transcription regulator	i1_LQ_LWC_c21405/f1p1/1947	Transcript	moderately similar to ( 323) AT2G13690 | Symbols: | PRLI-interacting factor, putative | chr2:5706704-5708895 REVERSE protein|H-BTB2 - Bric-a-Brac, Tramtrack, Broad Complex BTB domain with H family conserved sequence, expressed	-2.79253
27.3.67	RNA.regulation of transcription.putative transcription regulator	i1_LQ_LWC_c30106/f1p0/1835	Transcript	moderately similar to ( 203) AT1G17880 | Symbols: | nascent polypeptide-associated complex (NAC) domain-containing protein / BTF3b-like transcription factor, putative | chr1:6152572-6153425 REVERSE protein|transcription factor BTF3, putative, expressed	3.96681
27.3.67	RNA.regulation of transcription.putative transcription regulator	i1_LQ_LWC_c32029/f1p2/1508	Transcript	weakly similar to ( 150) AT5G09850 | Symbols: | transcription elongation factor-related | chr5:3063488-3065221 REVERSETFIIS protein|transcription elongation factor protein, putative, expressed	10.1636
27.3.67	RNA.regulation of transcription.putative transcription regulator	i3_LQ_LWC_c18668/f1p1/3168	Transcript	weakly similar to ( 173) AT4G14465 | Symbols: | DNA-binding protein-related | chr4:8320972-8321817 FORWARDDUF296 protein|DNA binding protein, putative, expressed	9.07758
27.3.67	RNA.regulation of transcription.putative transcription regulator	i1_LQ_LWC_c20812/f1p0/1891	Transcript	highly similar to ( 623) AT1G04950 | Symbols: TAFII59 | TAF6 (TBP-ASSOCIATED FACTOR 6); DNA binding / RNA polymerase II transcription factor/ transcription initiation factor | chr1:1403606-1407184 REVERSE TAF6 DUF1546 TAF protein|TATA binding protein-associated factor, putative, expressed	11.7922
27.3.67	RNA.regulation of transcription.putative transcription regulator	i1_LQ_LWC_c34267/f1p2/1795	Transcript	moderately similar to ( 473) AT4G02820 | Symbols: | pentatricopeptide (PPR) repeat-containing protein | chr4:1258581-1260265 FORWARD protein|pentatricopeptide, putative, expressed	9.37188
27.3.67	RNA.regulation of transcription.putative transcription regulator	i1_HQ_LWC_c16354/f2p0/1630	Transcript	moderately similar to ( 422) AT2G47790 | Symbols: | transducin family protein / WD-40 repeat family protein | chr2:19571102-19572946 REVERSE protein|WD domain, G-beta repeat domain containing protein, expressed	0.737565
27.3.67	RNA.regulation of transcription.putative transcription regulator	i1_HQ_LWC_c2938/f6p0/2002	Transcript	weakly similar to ( 162) AT2G45850 | Symbols: | DNA-binding family protein | chr2:18871901-18873457 REVERSEDUF296 protein|AT hook motif domain containing protein, expressed	11.8441
27.3.67	RNA.regulation of transcription.putative transcription regulator	i2_LQ_LWC_c23780/f1p1/2607	Transcript	moderately similar to ( 359) AT5G60170 | Symbols: | RNA binding / nucleic acid binding / nucleotide binding / protein binding / zinc ion binding | chr5:24228178-24232394 FORWARD MOT2 protein|RNA recognition motif containing protein, putative, expressed	5.61161
27.3.67	RNA.regulation of transcription.putative transcription regulator	i1_LQ_LWC_c25950/f1p4/1334	Transcript	weakly similar to ( 173) AT1G17880 | Symbols: | nascent polypeptide-associated complex (NAC) domain-containing protein / BTF3b-like transcription factor, putative | chr1:6152572-6153425 REVERSE protein|transcription factor BTF3, putative, expressed	0.968976
27.3.67	RNA.regulation of transcription.putative transcription regulator	i2_HQ_LWC_c81789/f2p0/2170	Transcript	moderately similar to ( 431) AT5G47430 | Symbols: | zinc ion binding | chr5:19235819-19240147 REVERSE COG5222 DWNN protein|transposon protein, putative, CACTA, En/Spm sub-class, expressed	10.6531
27.3.67	RNA.regulation of transcription.putative transcription regulator	i2_LQ_LWC_c32121/f1p2/2995	Transcript	weakly similar to ( 182) AT3G07030 | Symbols: | nucleic acid binding | chr3:2223001-2225254 REVERSE Alba protein|nucleic acid binding protein, putative, expressed	7.35866
27.3.67	RNA.regulation of transcription.putative transcription regulator	i1_HQ_LWC_c16745/f2p0/1796	Transcript	moderately similar to ( 353) AT5G05850 | Symbols: | leucine-rich repeat family protein | chr5:1762691-1764609 REVERSE COG4886 protein|leucine rich repeat containing protein, expressed	11.4521
27.3.67	RNA.regulation of transcription.putative transcription regulator	i1_LQ_LWC_c18991/f1p0/1971	Transcript	moderately similar to ( 374) AT5G11430 | Symbols: | zinc ion binding | chr5:3648469-3652256 FORWARD TFIIS_M TFS2M protein|transcription factor S-II, central domain containing protein, expressed	-7.68003
27.3.67	RNA.regulation of transcription.putative transcription regulator	i2_LQ_LWC_c18255/f1p12/2760	Transcript	nearly identical (1102) AT2G26780 | Symbols: | binding | chr2:11410125-11423598 FORWARD protein|HEAT repeat family protein, putative, expressed	-3.29296
27.3.67	RNA.regulation of transcription.putative transcription regulator	i2_LQ_LWC_c108695/f1p2/2383	Transcript	moderately similar to ( 239) AT1G72650 | Symbols: TRFL6 | TRFL6 (TRF-LIKE 6); DNA binding / transcription factor | chr1:27350253-27353483 FORWARD protein|MYB family transcription factor, putative, expressed	2.52761
27.3.67	RNA.regulation of transcription.putative transcription regulator	i1_LQ_LWC_c18009/f1p4/1890	Transcript	moderately similar to ( 404) AT1G02150 | Symbols: | pentatricopeptide (PPR) repeat-containing protein | chr1:408779-410433 FORWARD protein|PPR repeat domain containing protein, putative, expressed	-4.02226
27.3.67	RNA.regulation of transcription.putative transcription regulator	i2_LQ_LWC_c24119/f1p0/2285	Transcript	moderately similar to ( 221) AT1G75560 | Symbols: | zinc knuckle (CCHC-type) family protein | chr1:28371420-28372717 REVERSE protein|zinc knuckle domain containing protein, expressed	7.52293
27.3.67	RNA.regulation of transcription.putative transcription regulator	i3_LQ_LWC_c13376/f1p0/3320	Transcript	weakly similar to ( 174) AT3G17450 | Symbols: | hAT dimerisation domain-containing protein | chr3:5972793-5975684 REVERSEDUF659 protein|transposon protein, putative, Ac/Ds sub-class, expressed	11.6369
27.3.67	RNA.regulation of transcription.putative transcription regulator	i1_LQ_LWC_c20811/f1p0/1469	Transcript	highly similar to ( 781) AT3G43240 | Symbols: | ARID/BRIGHT DNA-binding domain-containing protein | chr3:15210032-15214440 REVERSE protein|ARID/BRIGHT DNA-binding domain containing protein, expressed	7.61532
27.3.67	RNA.regulation of transcription.putative transcription regulator	i3_LQ_LWC_c28346/f1p1/4064	Transcript	very weakly similar to (87.8) AT3G61260 | Symbols: | DNA-binding family protein / remorin family protein | chr3:22675403-22676701 REVERSEvery weakly similar to (95.9) REMO_SOLTU Remorin (pp34) - Solanum tuberosum (Potato) protein|remorin, putative, expressed	0
27.3.67	RNA.regulation of transcription.putative transcription regulator	i2_HQ_LWC_c10214/f5p1/2189	Transcript	moderately similar to ( 358) AT1G04020 | Symbols: ATBARD1, BARD1 | BARD1 (BREAST CANCER ASSOCIATED RING 1); DNA binding / transcription coactivator | chr1:1036610-1040045 FORWARD protein|BRCA1 C Terminus domain containing protein, expressed	1.66308
27.3.67	RNA.regulation of transcription.putative transcription regulator	i1_HQ_LWC_c17696/f2p95/1657	Transcript	weakly similar to ( 120) AT3G57540 | Symbols: | remorin family protein | chr3:21301623-21302924 REVERSERemorin_C protein|remorin, putative, expressed	2.21643
27.3.67	RNA.regulation of transcription.putative transcription regulator	i1_LQ_LWC_c19160/f1p1/1440	Transcript	highly similar to ( 566) AT1G59453 | Symbols: | transcription factor-related | chr1:21846902-21853384 REVERSE protein|transcription factor-related, putative, expressed	7.55861
27.3.67	RNA.regulation of transcription.putative transcription regulator	i1_LQ_LWC_c3947/f1p3/1509	Transcript	moderately similar to ( 231) AT1G53670 | Symbols: MSRB1, ATMSRB1 | MSRB1 (methionine sulfoxide reductase B 1); peptide-methionine-(S)-S-oxide reductase | chr1:20036687-20038074 FORWARD PRK00222 COG0229 SelR PRK05550 PRK05508 protein|peptide methionine sulfoxide reductase msrB, putative, expressed	8.96002
27.3.67	RNA.regulation of transcription.putative transcription regulator	i1_LQ_LWC_c14478/f1p60/1346	Transcript	weakly similar to ( 113) AT1G15910 | Symbols: | XH/XS domain-containing protein / XS zinc finger domain-containing protein | chr1:5465951-5468723 FORWARDXH protein|XH domain containing protein, expressed	-6.32916
27.3.67	RNA.regulation of transcription.putative transcription regulator	i2_LQ_LWC_c18112/f1p36/2638	Transcript	highly similar to ( 684) AT5G55390 | Symbols: EDM2 | EDM2; transcription factor | chr5:22448152-22454414 REVERSE protein|EDM2, putative, expressed	2.59428
27.3.67	RNA.regulation of transcription.putative transcription regulator	i1_LQ_LWC_c4821/f1p0/1889	Transcript	moderately similar to ( 304) AT2G13690 | Symbols: | PRLI-interacting factor, putative | chr2:5706704-5708895 REVERSE protein|H-BTB8 - Bric-a-Brac, Tramtrack, Broad Complex BTB domain with H family conserved sequence, expressed	0
27.3.67	RNA.regulation of transcription.putative transcription regulator	i2_LQ_LWC_c105833/f1p3/2880	Transcript	highly similar to ( 530) AT4G09980 | Symbols: EMB1691 | EMB1691 (EMBRYO DEFECTIVE 1691); S-adenosylmethionine-dependent methyltransferase/ methyltransferase/ nucleic acid binding | chr4:6249111-6252030 REVERSEweakly similar to ( 130) MTA70_MEDTR Putative N6-adenosine-methyltransferase MT-A70-like (EC 2.1.1.62) - Medicago truncatula (Barrel medic) MT-A70 IME4 protein|MT-A70 domain containing prote…	-7.32194
27.3.68	RNA.regulation of transcription.PWWP domain protein	i11_LQ_LWC_c16/f1p0/11455	Transcript	moderately similar to ( 244) AT5G23150 | Symbols: HUA2 | HUA2 (ENHANCER OF AG-4 2); transcription factor | chr5:7786173-7792080 FORWARD RPR protein|retrotransposon protein, putative, unclassified, expressed	-10.0456
27.3.69	RNA.regulation of transcription.SET-domain transcriptional regulator family	i3_LQ_LWC_c18905/f1p0/3766	Transcript	moderately similar to ( 455) AT2G35160 | Symbols: SUVH5, SGD9 | SUVH5 (SU(VAR)3-9 HOMOLOG 5); histone methyltransferase | chr2:14823562-14825946 FORWARD YDG_SRA SRA SET SET Pre-SET PreSET COG2940 protein|YDG/SRA domain containing protein, expressed	-10.8381
27.3.69	RNA.regulation of transcription.SET-domain transcriptional regulator family	i2_LQ_LWC_c4192/f1p0/2987	Transcript	highly similar to ( 659) AT5G14260 | Symbols: | SET domain-containing protein | chr5:4601139-4603873 FORWARD Rubis-subs-bind protein|SET domain-containing protein, putative, expressed	-2.55376
27.3.69	RNA.regulation of transcription.SET-domain transcriptional regulator family	i1_LQ_LWC_c3046/f1p1/2019	Transcript	moderately similar to ( 319) AT2G44150 | Symbols: ASHH3, SDG7 | ASHH3 (HISTONE-LYSINE N-METHYLTRANSFERASE ASHH3); histone-lysine N-methyltransferase | chr2:18258863-18261003 FORWARD SET SET COG2940 protein|SET domain containing protein, expressed	9.03315
27.3.69	RNA.regulation of transcription.SET-domain transcriptional regulator family	i1_LQ_LWC_c10761/f1p1/1634	Transcript	highly similar to ( 545) AT3G21820 | Symbols: ATXR2, SDG36 | ATXR2 (HISTONE-LYSINE N-METHYLTRANSFERASE ATXR2); zinc ion binding | chr3:7688629-7691444 REVERSE protein|zinc finger protein, putative, expressed	9.43588
27.3.69	RNA.regulation of transcription.SET-domain transcriptional regulator family	i2_LQ_LWC_c35870/f1p0/2865	Transcript	highly similar to ( 771) AT2G23380 | Symbols: CLF, ICU1, SDG1, SET1 | CLF (CURLY LEAF); transcription factor | chr2:9955570-9960117 FORWARDnearly identical (1210) EZ1_MAIZE Polycomb protein EZ1 (Enhancer of zeste protein 1) - Zea mays (Maize) SET SET protein|SET domain containing protein, expressed	3.70471
27.3.69	RNA.regulation of transcription.SET-domain transcriptional regulator family	i10_LQ_LWC_c104/f1p0/10182	Transcript	moderately similar to ( 407) AT2G23740 | Symbols: | nucleic acid binding / transcription factor/ zinc ion binding | chr2:10098213-10103229 FORWARD SET SET COG2940 protein|SET domain protein SDG117, putative, expressed	9.74329
27.3.71	RNA.regulation of transcription.SNF7	i5_LQ_LWC_c6233/f1p0/5174	Transcript	weakly similar to ( 153) AT2G19830 | Symbols: SNF7.2, VPS32 | SNF7.2 | chr2:8558101-8559389 REVERSE Snf7 protein|SNF7 domain containing protein, putative, expressed	7.08409
27.3.71	RNA.regulation of transcription.SNF7	i0_LQ_LWC_c556/f1p0/993	Transcript	weakly similar to ( 155) AT2G19830 | Symbols: SNF7.2, VPS32 | SNF7.2 | chr2:8558101-8559389 REVERSE Snf7 protein|SNF7 domain containing protein, putative, expressed	10.6604
27.3.71	RNA.regulation of transcription.SNF7	i0_LQ_LWC_c867/f1p0/997	Transcript	moderately similar to ( 233) AT2G06530 | Symbols: VPS2.1 | VPS2.1 | chr2:2588740-2590285 REVERSE Snf7 protein|SNF7 domain containing protein, putative, expressed	12.157
27.3.71	RNA.regulation of transcription.SNF7	i1_LQ_LWC_c13957/f1p0/1117	Transcript	moderately similar to ( 221) AT1G03950 | Symbols: VPS2.3 | VPS2.3 (VACUOLAR PROTEIN SORTING-ASSOCIATED PROTEIN 2.3) | chr1:1011388-1013212 REVERSE Snf7 protein|SNF7 domain containing protein, putative, expressed	2.31818
27.3.71	RNA.regulation of transcription.SNF7	i1_LQ_LWC_c37716/f1p0/1101	Transcript	moderately similar to ( 292) AT3G10640 | Symbols: VPS60.1 | VPS60.1 | chr3:3323501-3324484 REVERSE Snf7 protein|SNF7 domain containing protein, putative, expressed	13.0554
27.3.71	RNA.regulation of transcription.SNF7	i1_LQ_LWC_c20619/f1p0/1475	Transcript	weakly similar to ( 170) AT2G19830 | Symbols: SNF7.2, VPS32 | SNF7.2 | chr2:8558101-8559389 REVERSE Snf7 protein|SNF7 domain containing protein, putative, expressed	12.9134
27.3.71	RNA.regulation of transcription.SNF7	i1_LQ_LWC_c42588/f1p0/1022	Transcript	moderately similar to ( 249) AT1G73030 | Symbols: VPS46.2 | VPS46.2 | chr1:27473938-27474848 FORWARD protein|SNF7 domain containing protein, putative, expressed	14.235
27.3.71	RNA.regulation of transcription.SNF7	i2_LQ_LWC_c86262/f1p0/2635	Transcript	moderately similar to ( 226) AT2G06530 | Symbols: VPS2.1 | VPS2.1 | chr2:2588740-2590285 REVERSE Snf7 protein|SNF7 domain containing protein, putative, expressed	1.41105
27.3.73	RNA.regulation of transcription.Zn-finger(CCHC)	i1_LQ_LWC_c27681/f4p9/2007	Transcript	moderately similar to ( 213) AT4G19190 | Symbols: | zinc knuckle (CCHC-type) family protein | chr4:10493323-10495969 FORWARD protein|zinc knuckle family protein, putative, expressed	9.70575
27.3.73	RNA.regulation of transcription.Zn-finger(CCHC)	i1_HQ_LWC_c37287/f3p0/1308	Transcript	weakly similar to ( 126) AT5G49400 | Symbols: | zinc knuckle (CCHC-type) family protein | chr5:20031154-20031981 FORWARD protein|zinc finger CCHC domain-containing protein 10, putative, expressed	12.6109
27.3.73	RNA.regulation of transcription.Zn-finger(CCHC)	i1_LQ_LWC_c17725/f1p0/1910	Transcript	moderately similar to ( 207) AT3G62330 | Symbols: | zinc knuckle (CCHC-type) family protein | chr3:23063329-23065419 REVERSE protein|zinc knuckle family protein, putative, expressed	0
27.3.80	RNA.regulation of transcription.zf-HD	i2_HQ_LWC_c60977/f2p0/2087	Transcript	very weakly similar to ( 100) AT2G02540 | Symbols: ATHB21, ZFHD4 | ATHB21 (ARABIDOPSIS THALIANA HOMEOBOX PROTEIN 21); DNA binding / transcription activator/ transcription factor | chr2:684302-685234 FORWARDZF-HD_dimer protein|ZF-HD protein dimerisation region containing protein, expressed	0
27.3.81	RNA.regulation of transcription.S1FA	i2_LQ_LWC_c38042/f1p1/2360	Transcript	S1FA protein|DNA-binding protein S1FA, putative, expressed	10.4904
27.3.99	RNA.regulation of transcription.unclassified	i1_LQ_LWC_c22343/f1p2/1807	Transcript	moderately similar to ( 372) AT1G11650 | Symbols: ATRBP45B, RBP45B | RNA-binding protein 45 (RBP45), putative | chr1:3914895-3917301 FORWARD COG0724 RRM protein|RNA recognition motif containing protein, putative, expressed	0
27.3.99	RNA.regulation of transcription.unclassified	i1_LQ_LWC_c23285/f1p0/2001	Transcript	highly similar to ( 553) AT5G56900 | Symbols: | CwfJ-like family protein / zinc finger (CCCH-type) family protein | chr5:23019750-23022670 REVERSE CwfJ_C_1 CwfJ_C_2 protein|cwfJ-like family protein, putative, expressed	0
27.3.99	RNA.regulation of transcription.unclassified	i2_LQ_LWC_c76175/f1p0/2087	Transcript	weakly similar to ( 187) AT1G66810 | Symbols: | zinc finger (CCCH-type) family protein | chr1:24927613-24928619 REVERSE protein|zinc finger C-x8-C-x5-C-x3-H type family protein, expressed	-3.70961
27.3.99	RNA.regulation of transcription.unclassified	i1_LQ_LWC_c30230/f1p0/1679	Transcript	moderately similar to ( 213) AT3G18620 | Symbols: | zinc finger (DHHC type) family protein | chr3:6408849-6410716 FORWARD COG5273 zf-DHHC protein|DHHC zinc finger domain containing protein, expressed	2.25974
27.3.99	RNA.regulation of transcription.unclassified	i1_LQ_LWC_c36355/f1p0/1960	Transcript	weakly similar to ( 195) AT5G50020 | Symbols: | zinc finger (DHHC type) family protein | chr5:20351591-20354124 FORWARD protein|zinc finger DHHC domain-containing protein, putative, expressed	8.63549
27.3.99	RNA.regulation of transcription.unclassified	i1_LQ_LWC_c11829/f1p0/1575	Transcript	moderately similar to ( 385) AT2G39710 | Symbols: | aspartyl protease family protein | chr2:16562051-16563379 REVERSE protein|aspartic proteinase nepenthesin precursor, putative, expressed	-11.1674
27.3.99	RNA.regulation of transcription.unclassified	i0_LQ_LWC_c852/f1p0/930	Transcript	very weakly similar to (84.7) AT3G48940 | Symbols: | remorin family protein | chr3:18142863-18144163 REVERSE protein|remorin, putative, expressed	7.49598
27.3.99	RNA.regulation of transcription.unclassified	i1_LQ_LWC_c20541/f2p1/1769	Transcript	weakly similar to ( 150) AT1G56460 | Symbols: | PAPA-1-like family protein / zinc finger (HIT type) family protein | chr1:21146765-21149468 FORWARD protein|PAPA-1-like conserved region family protein, expressed	-10.2159
27.3.99	RNA.regulation of transcription.unclassified	i1_LQ_LWC_c30765/f1p0/1723	Transcript	moderately similar to ( 488) AT1G55460 | Symbols: | Kin17 DNA-binding protein-related | chr1:20707567-20708802 FORWARD protein|KIN, antigenic determinant of recA protein, putative, expressed	-10.0441
27.3.99	RNA.regulation of transcription.unclassified	i1_LQ_LWC_c34341/f1p5/1980	Transcript	moderately similar to ( 322) AT3G60400 | Symbols: | mitochondrial transcription termination factor-related / mTERF-related | chr3:22329093-22330769 FORWARD protein|mTERF domain containing protein, expressed	-2.84803
27.3.99	RNA.regulation of transcription.unclassified	i1_LQ_LWC_c13057/f1p0/1367	Transcript	moderately similar to ( 224) AT4G39870 | Symbols: | FUNCTIONS IN: molecular_function unknown; INVOLVED IN: biological_process unknown; LOCATED IN: cellular_component unknown; EXPRESSED IN: 23 plant structures; EXPRESSED DURING: 15 growth stages; CONTAINS InterPro DOMAIN/s: TLDc (InterPro:IPR006571); BEST Arabidopsis thaliana protein match is: unknown protein (TAIR:AT2G05590.2); Has 2018 Blast hit…	-5.72746
27.3.99	RNA.regulation of transcription.unclassified	i2_LQ_LWC_c90046/f1p0/2219	Transcript	moderately similar to ( 439) AT3G26935 | Symbols: | zinc finger (DHHC type) family protein | chr3:9933001-9935218 REVERSE COG5273 zf-DHHC protein|zinc finger DHHC domain-containing protein, putative, expressed	-3.70156
27.3.99	RNA.regulation of transcription.unclassified	i1_LQ_LWC_c29885/f1p0/1844	Transcript	moderately similar to ( 353) AT3G26935 | Symbols: | zinc finger (DHHC type) family protein | chr3:9933001-9935218 REVERSE COG5273 zf-DHHC protein|zinc finger DHHC domain-containing protein, putative, expressed	-9.52267
27.3.99	RNA.regulation of transcription.unclassified	i2_LQ_LWC_c85136/f1p12/2819	Transcript	highly similar to ( 545) AT1G33420 | Symbols: | PHD finger family protein | chr1:12121063-12123346 REVERSE protein|PHD-finger domain containing protein, putative, expressed	0
27.3.99	RNA.regulation of transcription.unclassified	i2_LQ_LWC_c65659/f1p1/2849	Transcript	highly similar to ( 570) AT1G07360 | Symbols: | zinc finger (CCCH-type) family protein / RNA recognition motif (RRM)-containing protein | chr1:2260562-2262795 REVERSE protein|RNA-binding motif protein, putative, expressed	-7.49057
27.3.99	RNA.regulation of transcription.unclassified	i1_HQ_LWC_c20923/f2p7/1559	Transcript	moderately similar to ( 433) AT1G01930 | Symbols: | zinc finger protein-related | chr1:320041-322809 REVERSE protein|ZOS4-12 - C2H2 zinc finger protein, expressed	3.0225
27.3.99	RNA.regulation of transcription.unclassified	i2_LQ_LWC_c17416/f1p7/2150	Transcript	moderately similar to ( 338) AT5G62090 | Symbols: | FUNCTIONS IN: molecular_function unknown; INVOLVED IN: biological_process unknown; LOCATED IN: cellular_component unknown; EXPRESSED IN: 17 plant structures; EXPRESSED DURING: 10 growth stages; BEST Arabidopsis thaliana protein match is: SLK1 (SEUSS-LIKE 1); transcription regulator (TAIR:AT4G25520.1); Has 38202 Blast hits to 15459 proteins in 74…	10.3225
27.3.99	RNA.regulation of transcription.unclassified	i1_LQ_LWC_c16950/f1p0/1985	Transcript	highly similar to ( 597) AT2G44020 | Symbols: | mitochondrial transcription termination factor-related / mTERF-related | chr2:18217737-18219260 REVERSE mTERF protein|mitochondrial transcription termination factor family protein, putative, expressed	0.948618
27.3.99	RNA.regulation of transcription.unclassified	i1_HQ_LWC_c10042/f3p2/1992	Transcript	weakly similar to ( 103) AT1G21150 | Symbols: | mitochondrial transcription termination factor family protein / mTERF family protein | chr1:7406406-7407578 REVERSE mTERF protein|mTERF family protein, expressed	10.5482
27.3.99	RNA.regulation of transcription.unclassified	i1_LQ_LWC_c38076/f1p0/1152	Transcript	moderately similar to ( 385) AT1G11650 | Symbols: ATRBP45B, RBP45B | RNA-binding protein 45 (RBP45), putative | chr1:3914895-3917301 FORWARDvery weakly similar to (86.7) ROC5_NICSY 33 kDa ribonucleoprotein, chloroplast precursor - Nicotiana sylvestris (Wood tobacco) COG0724 RRM protein|RNA recognition motif containing protein, putative, expressed	13.29
27.3.99	RNA.regulation of transcription.unclassified	i1_HQ_LWC_c23493/f2p0/1622	Transcript	moderately similar to ( 343) AT2G20280 | Symbols: | zinc finger (CCCH-type) family protein | chr2:8740054-8742349 REVERSE COG5252 protein|zinc finger C-x8-C-x5-C-x3-H type family protein, expressed	3.30512
27.3.99	RNA.regulation of transcription.unclassified	i2_LQ_LWC_c89999/f1p0/2140	Transcript	moderately similar to ( 208) AT5G57870 | Symbols: | eukaryotic translation initiation factor 4F, putative / eIF-4F, putative | chr5:23439755-23443433 FORWARDmoderately similar to ( 251) IF41_WHEAT Eukaryotic initiation factor iso-4F subunit p82-34 (eIF-(iso)4F p82-34) - Triticum aestivum (Wheat) protein|zinc finger C-x8-C-x5-C-x3-H type family protein, expressed	6.32775
27.3.99	RNA.regulation of transcription.unclassified	i1_LQ_LWC_c32990/f1p3/1965	Transcript	weakly similar to ( 132) AT1G69420 | Symbols: | zinc finger (DHHC type) family protein | chr1:26093690-26096736 FORWARD protein|zinc finger family protein, putative, expressed	4.55239
27.3.99	RNA.regulation of transcription.unclassified	i1_LQ_LWC_c24432/f1p0/1686	Transcript	moderately similar to ( 251) AT1G53490 | Symbols: | DNA binding | chr1:19965146-19966811 FORWARD protein|DNA binding protein, putative, expressed	-3.89777
27.3.99	RNA.regulation of transcription.unclassified	i1_LQ_LWC_c21922/f1p0/1866	Transcript	weakly similar to ( 177) AT4G11060 | Symbols: MTSSB | MTSSB (mitochondrially targeted single-stranded DNA binding protein); single-stranded DNA binding | chr4:6754820-6756230 REVERSE RT_nLTR_like RVT_1 protein|retrotransposon protein, putative, LINE subclass, expressed	-3.08863
27.3.99	RNA.regulation of transcription.unclassified	i1_LQ_LWC_c10821/f1p3/1526	Transcript	moderately similar to ( 385) AT1G32130 | Symbols: | FUNCTIONS IN: molecular_function unknown; INVOLVED IN: biological_process unknown; LOCATED IN: cellular_component unknown; EXPRESSED IN: 25 plant structures; EXPRESSED DURING: 15 growth stages; CONTAINS InterPro DOMAIN/s: TFIIS N-terminal (InterPro:IPR017923), IWS1, C-terminal (InterPro:IPR008654); BEST Arabidopsis thaliana protein match is: IWS…	11.6099
27.3.99	RNA.regulation of transcription.unclassified	i1_LQ_LWC_c12670/f1p11/1554	Transcript	moderately similar to ( 258) AT3G51390 | Symbols: | zinc finger (DHHC type) family protein | chr3:19075718-19077966 FORWARD COG5273 protein|DHHC zinc finger domain containing protein, expressed	3.57522
27.3.99	RNA.regulation of transcription.unclassified	i1_LQ_LWC_c21915/f1p1/1865	Transcript	weakly similar to ( 152) AT3G09210 | Symbols: PTAC13 | PTAC13 (PLASTID TRANSCRIPTIONALLY ACTIVE13); transcription elongation regulator | chr3:2825422-2826850 REVERSENGN protein|transcription termination factor nusG family protein, expressed	-3.77082
27.3.99	RNA.regulation of transcription.unclassified	i1_LQ_LWC_c20380/f1p13/1770	Transcript	moderately similar to ( 449) AT3G20800 | Symbols: | rcd1-like cell differentiation protein, putative | chr3:7271412-7273897 REVERSE Rcd1 RCD1 protein|expressed protein	0.275402
27.3.99	RNA.regulation of transcription.unclassified	i1_LQ_LWC_c23541/f1p0/1738	Transcript	moderately similar to ( 442) AT4G24630 | Symbols: | receptor/ zinc ion binding | chr4:12714919-12717111 FORWARD COG5273 zf-DHHC protein|zinc finger DHHC domain-containing protein, putative, expressed	9.69802
27.3.99	RNA.regulation of transcription.unclassified	i1_HQ_LWC_c29713/f2p0/1889	Transcript	moderately similar to ( 399) AT1G01300 | Symbols: | aspartyl protease family protein | chr1:117065-118522 FORWARD Asp protein|aspartic proteinase, putative, expressed	6.41781
27.3.99	RNA.regulation of transcription.unclassified	i2_LQ_LWC_c84700/f1p1/2504	Transcript	moderately similar to ( 237) AT3G21480 | Symbols: | FUNCTIONS IN: molecular_function unknown; INVOLVED IN: biological_process unknown; LOCATED IN: intracellular; CONTAINS InterPro DOMAIN/s: BRCT (InterPro:IPR001357); BEST Arabidopsis thaliana protein match is: transcription coactivator (TAIR:AT4G03130.1); Has 489 Blast hits to 455 proteins in 115 species: Archae - 2; Bacteria - 37; Metazoa - 270;…	-2.43226
27.3.99	RNA.regulation of transcription.unclassified	i1_LQ_LWC_c7756/f1p2/1991	Transcript	highly similar to ( 734) AT5G15810 | Symbols: | N2,N2-dimethylguanosine tRNA methyltransferase family protein | chr5:5157798-5161121 FORWARD TRM TRM1 PRK04338 protein|N-dimethylguanosine tRNA methyltransferase, putative, expressed	-1.31237
27.3.99	RNA.regulation of transcription.unclassified	i2_LQ_LWC_c108568/f1p0/2195	Transcript	highly similar to ( 509) AT4G15080 | Symbols: | zinc finger (DHHC type) family protein | chr4:8609085-8612229 REVERSE zf-DHHC COG5273 protein|zinc finger family protein, putative, expressed	1.9567
27.3.99	RNA.regulation of transcription.unclassified	i1_HQ_LWC_c2365/f2p0/1970	Transcript	highly similar to ( 548) AT1G29800 | Symbols: | phosphoinositide binding / zinc ion binding | chr1:10432736-10435046 FORWARD COG2930 DUF500 protein|FYVE zinc finger domain containing protein, expressed	-5.0606
27.3.99	RNA.regulation of transcription.unclassified	i2_HQ_LWC_c43699/f2p0/2221	Transcript	very weakly similar to (95.5) AT4G31540 | Symbols: ATEXO70G1 | ATEXO70G1 (exocyst subunit EXO70 family protein G1); protein binding | chr4:15284739-15286802 REVERSE Exo70 protein|exo70 exocyst complex subunit, putative, expressed	-9.68419
27.3.99	RNA.regulation of transcription.unclassified	i1_LQ_LWC_c25119/f1p0/1477	Transcript	highly similar to ( 829) AT5G20350 | Symbols: TIP1 | TIP1 (TIP GROWTH DEFECTIVE 1); S-acyltransferase/ acyl binding | chr5:6876772-6881102 FORWARD COG5273 ANK zf-DHHC Arp protein|palmitoyltransferase TIP1, putative, expressed	-3.98442
27.3.99	RNA.regulation of transcription.unclassified	i1_LQ_LWC_c21805/f1p3/1907	Transcript	moderately similar to ( 369) AT1G70150 | Symbols: | zinc ion binding | chr1:26416898-26419521 FORWARD protein|zinc finger protein, putative, expressed	-4.27545
27.3.99	RNA.regulation of transcription.unclassified	i2_LQ_LWC_c66844/f1p0/2169	Transcript	moderately similar to ( 314) AT3G09320 | Symbols: | zinc finger (DHHC type) family protein | chr3:2862142-2864113 REVERSE COG5273 zf-DHHC protein|DHHC zinc finger domain containing protein, expressed	2.77432
27.3.99	RNA.regulation of transcription.unclassified	i1_LQ_LWC_c9395/f1p0/1852	Transcript	weakly similar to ( 151) AT5G07900 | Symbols: | mitochondrial transcription termination factor family protein / mTERF family protein | chr5:2520188-2521405 FORWARD mTERF protein|mTERF family protein, expressed	-1.16749
27.3.99	RNA.regulation of transcription.unclassified	i2_LQ_LWC_c13066/f1p0/2311	Transcript	weakly similar to ( 113) AT1G67325 | Symbols: | binding / zinc ion binding | chr1:25209825-25212412 REVERSE protein|zinc finger family protein, putative, expressed	12.3222
27.3.99	RNA.regulation of transcription.unclassified	i4_LQ_LWC_c21747/f1p39/4764	Transcript	moderately similar to ( 288) AT2G12646 | Symbols: | FUNCTIONS IN: molecular_function unknown; INVOLVED IN: biological_process unknown; LOCATED IN: cellular_component unknown; CONTAINS InterPro DOMAIN/s: Protein of unknown function DUF597 (InterPro:IPR006734); BEST Arabidopsis thaliana protein match is: zinc-binding protein, putative (TAIR:AT3G60670.1); Has 191 Blast hits to 191 proteins in 14 spe…	-11.083
27.3.99	RNA.regulation of transcription.unclassified	i2_HQ_LWC_c64701/f2p0/2140	Transcript	highly similar to ( 639) AT5G58760 | Symbols: DDB2 | DDB2 (damaged DNA-binding 2); nucleic acid binding / nucleotide binding / zinc ion binding | chr5:23730741-23733606 REVERSE protein|WD domain, G-beta repeat domain containing protein, expressed	9.08435
27.3.99	RNA.regulation of transcription.unclassified	i1_LQ_LWC_c17503/f1p0/1559	Transcript	moderately similar to ( 304) AT5G10770 | Symbols: | chloroplast nucleoid DNA-binding protein, putative | chr5:3403331-3405331 REVERSE Asp protein|aspartic proteinase, putative, expressed	11.2015
27.3.99	RNA.regulation of transcription.unclassified	i2_LQ_LWC_c25997/f1p2/2627	Transcript	highly similar to ( 990) AT1G60560 | Symbols: | SWIM zinc finger family protein | chr1:22308791-22311277 REVERSE protein|SWIM zinc finger family protein, putative, expressed	7.91128
27.3.99	RNA.regulation of transcription.unclassified	i5_LQ_LWC_c9179/f1p0/5394	Transcript	moderately similar to ( 469) AT1G07705 | Symbols: | transcription regulator | chr1:2382090-2385856 FORWARD NOT2_3_5 CDC36 protein|CCR4-NOT transcription factor, putative, expressed	6.58069
27.3.99	RNA.regulation of transcription.unclassified	i1_LQ_LWC_c19017/f1p34/1843	Transcript	highly similar to ( 565) AT1G69420 | Symbols: | zinc finger (DHHC type) family protein | chr1:26093690-26096736 FORWARD COG5273 zf-DHHC protein|zinc finger family protein, putative, expressed	-3.9709
27.3.99	RNA.regulation of transcription.unclassified	i1_LQ_LWC_c23265/f1p0/1778	Transcript	moderately similar to ( 396) AT1G47490 | Symbols: ATRBP47C | ATRBP47C (ARABIDOPSIS THALIANA RNA-BINDING PROTEIN 47C); RNA binding | chr1:17424801-17427182 FORWARDvery weakly similar to (82.8) ROC1_NICPL 30 kDa ribonucleoprotein, chloroplast precursor (CP-RBP30) - Nicotiana plumbaginifolia (Leadwort-leaved tobacco) COG0724 protein|RNA recognition motif containing protein, putative, expressed	14.0014
27.3.99	RNA.regulation of transcription.unclassified	i2_LQ_LWC_c33039/f1p0/2514	Transcript	moderately similar to ( 243) AT4G22140 | Symbols: | DNA binding / protein binding / zinc ion binding | chr4:11728093-11730230 REVERSE BAH_BAHCC1 BAH BAH BAH protein|ES43 protein, putative, expressed	5.65013
27.3.99	RNA.regulation of transcription.unclassified	i1_LQ_LWC_c12480/f1p2/1887	Transcript	weakly similar to ( 192) AT1G67325 | Symbols: | binding / zinc ion binding | chr1:25209825-25212412 REVERSE protein|zinc finger family protein, putative, expressed	10.1027
27.3.99	RNA.regulation of transcription.unclassified	i1_LQ_LWC_c35108/f1p0/2022	Transcript	highly similar to ( 564) AT4G36860 | Symbols: | zinc ion binding | chr4:17358580-17361189 REVERSE protein|LIM domain-containing protein, putative, expressed	2.89023
27.3.99	RNA.regulation of transcription.unclassified	i1_LQ_LWC_c4951/f1p0/1982	Transcript	weakly similar to ( 184) AT3G12700 | Symbols: | aspartyl protease family protein | chr3:4037136-4038387 FORWARD protein|aspartyl protease family protein, putative, expressed	0
27.3.99	RNA.regulation of transcription.unclassified	i3_LQ_LWC_c28346/f1p1/4064	Transcript	very weakly similar to (87.8) AT3G61260 | Symbols: | DNA-binding family protein / remorin family protein | chr3:22675403-22676701 REVERSEvery weakly similar to (95.9) REMO_SOLTU Remorin (pp34) - Solanum tuberosum (Potato) protein|remorin, putative, expressed	0
27.3.99	RNA.regulation of transcription.unclassified	i1_LQ_LWC_c23428/f1p0/1609	Transcript	moderately similar to ( 290) AT5G63830 | Symbols: | FUNCTIONS IN: molecular_function unknown; INVOLVED IN: biological_process unknown; LOCATED IN: chloroplast; EXPRESSED IN: 20 plant structures; EXPRESSED DURING: 7 growth stages; CONTAINS InterPro DOMAIN/s: Zinc finger, HIT-type (InterPro:IPR007529); Has 339 Blast hits to 334 proteins in 111 species: Archae - 0; Bacteria - 0; Metazoa - 177; Fungi…	1.5567
27.3.99	RNA.regulation of transcription.unclassified	i1_LQ_LWC_c31546/f1p0/1755	Transcript	highly similar to ( 545) AT4G02990 | Symbols: | mitochondrial transcription termination factor family protein / mTERF family protein | chr4:1322158-1323783 FORWARD mTERF protein|mTERF domain containing protein, expressed	5.87584
27.3.99	RNA.regulation of transcription.unclassified	i0_HQ_LWC_c142/f3p0/998	Transcript	moderately similar to ( 293) AT3G44150 | Symbols: | unknown protein | chr3:15887617-15888728 FORWARD protein|expp1 protein precursor, putative, expressed	-2.95137
27.3.99	RNA.regulation of transcription.unclassified	i1_LQ_LWC_c5510/f1p0/1492	Transcript	moderately similar to ( 301) AT1G09750 | Symbols: | chloroplast nucleoid DNA-binding protein-related | chr1:3157541-3158960 FORWARD protein|aspartic proteinase nepenthesin precursor, putative, expressed	3.88162
27.3.99	RNA.regulation of transcription.unclassified	i3_LQ_LWC_c19003/f1p0/3244	Transcript	moderately similar to ( 400) AT2G32080 | Symbols: PUR ALPHA-1 | PUR ALPHA-1; nucleic acid binding | chr2:13642716-13644036 REVERSE PurA protein|PUR ALPHA-1, putative, expressed	12.2177
27.3.99	RNA.regulation of transcription.unclassified	i1_HQ_LWC_c10584/f2p1/1819	Transcript	moderately similar to ( 218) AT5G10770 | Symbols: | chloroplast nucleoid DNA-binding protein, putative | chr5:3403331-3405331 REVERSE protein|aspartic proteinase nepenthesin-2 precursor, putative, expressed	-12.2919
27.3.99	RNA.regulation of transcription.unclassified	i1_HQ_LWC_c6794/f2p0/1597	Transcript	moderately similar to ( 386) AT3G53710 | Symbols: AGD6 | AGD6; ARF GTPase activator/ DNA binding / zinc ion binding | chr3:19903730-19905419 REVERSE ArfGap COG5347 ArfGap protein|GTPase-activating protein, putative, expressed	6.06525
27.3.99	RNA.regulation of transcription.unclassified	i2_LQ_LWC_c67970/f1p0/2419	Transcript	moderately similar to ( 202) AT3G21480 | Symbols: | FUNCTIONS IN: molecular_function unknown; INVOLVED IN: biological_process unknown; LOCATED IN: intracellular; CONTAINS InterPro DOMAIN/s: BRCT (InterPro:IPR001357); BEST Arabidopsis thaliana protein match is: transcription coactivator (TAIR:AT4G03130.1); Has 489 Blast hits to 455 proteins in 115 species: Archae - 2; Bacteria - 37; Metazoa - 270;…	-2.28756
27.3.99	RNA.regulation of transcription.unclassified	i1_LQ_LWC_c34675/f1p4/1748	Transcript	moderately similar to ( 228) AT1G53860 | Symbols: | remorin family protein | chr1:20107165-20109458 REVERSERemorin_C protein|remorin C-terminal domain containing protein, putative, expressed	7.87636
27.3.99	RNA.regulation of transcription.unclassified	i1_HQ_LWC_c6331/f5p0/1733	Transcript	moderately similar to ( 488) AT5G19350 | Symbols: | RNA-binding protein 45 (RBP45), putative | chr5:6518978-6521295 FORWARDvery weakly similar to (88.2) ROC1_SPIOL 28 kDa ribonucleoprotein, chloroplast (28RNP) - Spinacia oleracea (Spinach) COG0724 protein|RNA recognition motif containing protein, putative, expressed	4.80207
27.3.99	RNA.regulation of transcription.unclassified	i1_LQ_LWC_c12638/f1p0/1734	Transcript	moderately similar to ( 275) AT4G06634 | Symbols: | zinc finger (C2H2 type) family protein | chr4:3764499-3766177 REVERSE protein|ZOS2-09 - C2H2 zinc finger protein, expressed	4.69547
27.3.99	RNA.regulation of transcription.unclassified	i1_LQ_LWC_c10028/f1p2/1826	Transcript	moderately similar to ( 435) AT4G02220 | Symbols: | zinc finger (MYND type) family protein / programmed cell death 2 C-terminal domain-containing protein | chr4:976728-978902 FORWARD PDCD2_C protein|programmed cell death protein 2, putative, expressed	4.8052
27.3.99	RNA.regulation of transcription.unclassified	i1_LQ_LWC_c32508/f1p3/2000	Transcript	moderately similar to ( 394) AT2G15560 | Symbols: | INVOLVED IN: response to oxidative stress; LOCATED IN: cellular_component unknown; CONTAINS InterPro DOMAIN/s: Protein of unknown function DUF537 (InterPro:IPR007491); BEST Arabidopsis thaliana protein match is: EDA32 (embryo sac development arrest 32) (TAIR:AT3G62210.1); Has 184 Blast hits to 179 proteins in 38 species: Archae - 0; Bacteria - 4…	-4.6654
27.3.99	RNA.regulation of transcription.unclassified	i1_LQ_LWC_c34852/f1p4/2008	Transcript	weakly similar to ( 167) AT1G56460 | Symbols: | PAPA-1-like family protein / zinc finger (HIT type) family protein | chr1:21146765-21149468 FORWARD protein|PAPA-1-like conserved region family protein, expressed	9.8002
27.3.99	RNA.regulation of transcription.unclassified	i1_LQ_LWC_c33804/f1p0/2001	Transcript	weakly similar to ( 112) AT3G21810 | Symbols: | zinc finger (CCCH-type) family protein | chr3:7684852-7688360 FORWARD protein|zinc finger C-x8-C-x5-C-x3-H type family protein, expressed	0
27.3.99	RNA.regulation of transcription.unclassified	i1_LQ_LWC_c8830/f1p0/1782	Transcript	moderately similar to ( 217) AT2G30580 | Symbols: DRIP2 | DRIP2 (DREB2A-INTERACTING PROTEIN 2); protein binding / ubiquitin-protein ligase/ zinc ion binding | chr2:13026444-13030363 FORWARD protein|zinc finger family protein, putative, expressed	0
27.3.99	RNA.regulation of transcription.unclassified	i1_LQ_LWC_c36554/f1p12/1475	Transcript	moderately similar to ( 447) AT1G20110 | Symbols: | zinc finger (FYVE type) family protein | chr1:6971554-6974578 FORWARD FYVE FYVE FYVE protein|zinc finger family protein, putative, expressed	10.9439
27.3.99	RNA.regulation of transcription.unclassified	i1_LQ_LWC_c19268/f1p1/1647	Transcript	moderately similar to ( 223) AT1G67340 | Symbols: | zinc finger (MYND type) family protein / F-box family protein | chr1:25230323-25231622 FORWARD protein|OsFBO2 - F-box and other domain containing protein, expressed	12.4566
27.3.99	RNA.regulation of transcription.unclassified	i1_HQ_LWC_c37337/f3p0/1376	Transcript	highly similar to ( 600) AT1G09340 | Symbols: CRB, CSP41B | CRB (CHLOROPLAST RNA BINDING); binding / catalytic/ coenzyme binding | chr1:3015473-3018035 FORWARDWcaG Epimerase protein|3-beta hydroxysteroid dehydrogenase/isomerase family protein, putative, expressed	-3.12463
27.3.99	RNA.regulation of transcription.unclassified	i1_LQ_LWC_c42454/f1p0/1054	Transcript	weakly similar to ( 139) AT1G32540 | Symbols: LOL1 | LOL1 (LSD ONE LIKE 1); DNA binding | chr1:11768043-11769591 FORWARD protein|LSD1 zinc finger domain containing protein, expressed	12.0132
27.3.99	RNA.regulation of transcription.unclassified	i2_LQ_LWC_c69034/f1p1/2699	Transcript	moderately similar to ( 454) AT1G78540 | Symbols: SHB, ATSHB, STATLB | SHB (SH2 DOMAIN PROTEIN B); protein binding / signal transducer/ transcription factor | chr1:29541244-29544574 REVERSE protein|expressed protein	8.68723
27.3.99	RNA.regulation of transcription.unclassified	i1_LQ_LWC_c5448/f1p0/1487	Transcript	weakly similar to ( 160) AT1G32700 | Symbols: | zinc-binding family protein | chr1:11827986-11829444 FORWARDPLATZ protein|zinc-binding protein, putative, expressed	3.28623
27.3.99	RNA.regulation of transcription.unclassified	i2_LQ_LWC_c33385/f1p3/2666	Transcript	weakly similar to ( 137) AT5G07900 | Symbols: | mitochondrial transcription termination factor family protein / mTERF family protein | chr5:2520188-2521405 FORWARDmTERF protein|mTERF family protein, expressed	-1.36964
27.3.99	RNA.regulation of transcription.unclassified	i1_LQ_LWC_c38755/f1p0/1263	Transcript	moderately similar to ( 262) AT1G77930 | Symbols: | DNAJ heat shock N-terminal domain-containing protein | chr1:29301184-29302467 FORWARD DnaJ protein|heat shock protein DnaJ, putative, expressed	-4.92457
27.3.99	RNA.regulation of transcription.unclassified	i1_HQ_LWC_c10027/f2p0/1493	Transcript	moderately similar to ( 353) AT3G04970 | Symbols: | zinc finger (DHHC type) family protein | chr3:1376240-1378010 FORWARD COG5273 zf-DHHC protein|DHHC zinc finger domain containing protein, expressed	10.622
27.3.99	RNA.regulation of transcription.unclassified	i2_LQ_LWC_c102384/f1p1/2775	Transcript	weakly similar to ( 109) AT3G12630 | Symbols: | zinc finger (AN1-like) family protein | chr3:4012707-4013189 FORWARDmoderately similar to ( 207) ISAP1_ORYSA Multiple stress-responsive zinc-finger protein ISAP1 (Stress-associated protein 1) (OsISAP1) - Oryza sativa (Rice) protein|AN1-like zinc finger domain containing protein, expressed	2.96167
30.99	signalling.unspecified	i1_LQ_LWC_c9312/f1p0/1632	Transcript	very weakly similar to (82.4) AT2G20410 | Symbols: | activating signal cointegrator-related | chr2:8802561-8804194 FORWARD protein|expressed protein	11.134	unspecified
30.99	signalling.unspecified	i2_HQ_LWC_c63649/f3p1/2990	Transcript	highly similar to ( 567) AT5G12080 | Symbols: MSL10 | MSL10 (MECHANOSENSITIVE CHANNEL OF SMALL CONDUCTANCE-LIKE 10); mechanically-gated ion channel | chr5:3898182-3900923 REVERSE MS_channel protein|uncharacterized mscS family protein, putative, expressed	0
30.99	signalling.unspecified	i1_LQ_LWC_c21869/f1p0/1591	Transcript	moderately similar to ( 260) AT5G05930 | Symbols: | guanylyl cyclase-related (GC1) | chr5:1780270-1782532 REVERSE protein|guanylyl cyclase, putative, expressed	7.48413
30.99	signalling.unspecified	i1_LQ_LWC_c31328/f1p1/1917	Transcript	moderately similar to ( 442) AT5G19390 | Symbols: | pleckstrin homology (PH) domain-containing protein / RhoGAP domain-containing protein | chr5:6531906-6537143 FORWARD RhoGAP RhoGAP RhoGAP protein|pleckstrin homology domain-containing protein-related taxo, putative, expressed	7.88197
30.99	signalling.unspecified	i3_LQ_LWC_c11801/f1p0/3315	Transcript	moderately similar to ( 258) AT5G19390 | Symbols: | pleckstrin homology (PH) domain-containing protein / RhoGAP domain-containing protein | chr5:6531906-6537143 FORWARD protein|PH domain containing protein, expressed	0
21.1	redox.thioredoxin	i1_LQ_LWC_c17264/f1p0/1789	Transcript	moderately similar to ( 430) AT1G35620 | Symbols: ATPDIL5-2, ATPDI8, PDI8 | ATPDIL5-2 (PDI-LIKE 5-2); protein disulfide isomerase | chr1:13156504-13158280 FORWARDweakly similar to ( 109) PDI_RICCO Protein disulfide-isomerase precursor (EC 5.3.4.1) (PDI) - Ricinus communis (Castor bean) PDI_a_family Thioredoxin PDI_a_ERp38 PDI_a_P5 PDI_a_ERp46 PDI_a_TMX3 PDI_a_MPD1_like TRX_family PDI_a_PDIR prote…	-7.21878	thioredoxin
21.1	redox.thioredoxin	i1_LQ_LWC_c3597/f1p7/1579	Transcript	moderately similar to ( 410) AT1G04980 | Symbols: ATPDIL2-2, ATPDI10, PDI10 | ATPDIL2-2 (PDI-LIKE 2-2); protein disulfide isomerase | chr1:1413869-1416120 REVERSEweakly similar to ( 130) PDIA6_MEDSA Probable protein disulfide-isomerase A6 precursor (EC 5.3.4.1) (P5) - Medicago sativa (Alfalfa) PDI_a_P5 PDI_a_family PDI_a_MPD1_like Thioredoxin PDI_a_ERp38 PDI_a_ERdj5_C PDI_a_ERp46 PDI_a_PDI_a'_C P…	8.76081
21.1	redox.thioredoxin	i1_LQ_LWC_c22913/f1p13/1685	Transcript	weakly similar to ( 158) AT1G50320 | Symbols: ATHX, ATX | ATHX; enzyme activator | chr1:18638606-18639464 REVERSEvery weakly similar to (87.0) TRXM_PEA Thioredoxin M-type, chloroplast precursor (TRX-M) - Pisum sativum (Garden pea) Thioredoxin TRX_family trxA PRK10996 protein|thioredoxin, putative, expressed	9.01022
21.1	redox.thioredoxin	i2_LQ_LWC_c72049/f1p1/2394	Transcript	weakly similar to ( 164) AT1G07960 | Symbols: ATPDIL5-1 | ATPDIL5-1 (PDI-like 5-1) | chr1:2467681-2468831 FORWARD PDI_a_ERp46 PDI_a_family PDI_a_ERp38 protein|OsPDIL5-1 protein disulfide isomerase PDIL5-1, expressed	-3.90445
21.1	redox.thioredoxin	i1_LQ_LWC_c17813/f1p0/1994	Transcript	highly similar to ( 590) AT1G15020 | Symbols: ATQSOX1, QSO2 | thioredoxin family protein | chr1:5173341-5176105 REVERSE PDI_a_QSOX PDI_a_family PDI_a_ERp38 protein|OsQSOXL1 quiescin-sulfhydryl oxidase-like OsQSOXL1, expressed	-9.30216
21.1	redox.thioredoxin	i1_LQ_LWC_c20213/f1p0/1429	Transcript	weakly similar to ( 177) AT1G34780 | Symbols: ATAPRL4 | ATAPRL4 (APR-like 4) | chr1:12748835-12750124 REVERSE PDI_a_ERp44_like protein|OsAPRL4 adenosine 5'-phosphosulfate reductase-like OsAPRL4, expressed	5.71163
21.1	redox.thioredoxin	i1_LQ_LWC_c34323/f1p0/1423	Transcript	highly similar to ( 517) AT1G36050 | Symbols: | unknown protein | chr1:13450467-13453055 FORWARD DUF1692 protein|endoplasmic reticulum-Golgi intermediate compartment protein 3, putative, expressed	6.03045
21.1	redox.thioredoxin	i1_LQ_LWC_c30803/f1p0/1964	Transcript	moderately similar to ( 445) AT3G16110 | Symbols: ATPDIL1-6, ATPDI4, PDI4 | ATPDIL1-6 (PDI-LIKE 1-6); protein disulfide isomerase | chr3:5460955-5463666 REVERSEweakly similar to ( 152) PDI_RICCO Protein disulfide-isomerase precursor (EC 5.3.4.1) (PDI) - Ricinus communis (Castor bean) PDI_a_PDI_a'_C PDI_a_family protein|OsPDIL1-5 protein disulfide isomerase PDIL1-5, expressed	10.556
21.1	redox.thioredoxin	i2_LQ_LWC_c109242/f1p1/2702	Transcript	moderately similar to ( 311) AT2G42580 | Symbols: TTL3, VIT | TTL3 (TETRATRICOPETIDE-REPEAT THIOREDOXIN-LIKE 3); binding / protein binding | chr2:17728855-17731461 FORWARD protein|TTL3, putative, expressed	9.93945
21.1	redox.thioredoxin	i1_LQ_LWC_c7285/f1p0/1469	Transcript	moderately similar to ( 220) AT5G18120 | Symbols: ATAPRL7 | ATAPRL7 (APR-like 7) | chr5:5991385-5993696 FORWARD PDI_a_ERp44_like protein|OsAPRL5 adenosine 5'-phosphosulfate reductase-like OsAPRL5, expressed	-1.49793
21.1	redox.thioredoxin	i1_LQ_LWC_c14493/f1p0/1188	Transcript	moderately similar to ( 468) AT2G17420 | Symbols: NTRA, ATNTRA, NTR2 | NTRA (NADPH-DEPENDENT THIOREDOXIN REDUCTASE A); thioredoxin-disulfide reductase | chr2:7564357-7566219 FORWARD TrxB PRK10262 AhpF Pyr_redox_2 PRK11749 protein|thioredoxin reductase 2, putative, expressed	1.31769
21.1	redox.thioredoxin	i2_LQ_LWC_c65521/f1p0/2718	Transcript	weakly similar to ( 149) AT3G15360 | Symbols: ATHM4, TRX-M4, ATM4 | TRX-M4 (ARABIDOPSIS THIOREDOXIN M-TYPE 4); enzyme activator | chr3:5188448-5189457 FORWARDweakly similar to ( 150) TRXM_PEA Thioredoxin M-type, chloroplast precursor (TRX-M) - Pisum sativum (Garden pea) Thioredoxin TRX_family trxA COG3118 PRK10996 TrxA protein|thioredoxin, putative, expressed	3.31019
21.1	redox.thioredoxin	i2_LQ_LWC_c21943/f1p0/2411	Transcript	weakly similar to ( 127) AT5G39950 | Symbols: ATTRX2, ATH2, ATTRXH2, TRXH2 | ATTRX2 (THIOREDOXIN 2); oxidoreductase, acting on sulfur group of donors, disulfide as acceptor | chr5:15990885-15991881 REVERSEweakly similar to ( 117) TRXH_RICCO Thioredoxin H-type (TRX-H) - Ricinus communis (Castor bean) TRX_family Thioredoxin protein|thioredoxin, putative, expressed	10.4556
21.1	redox.thioredoxin	i1_LQ_LWC_c24989/f1p0/1534	Transcript	weakly similar to ( 199) AT1G08570 | Symbols: ACHT4 | ACHT4 (ATYPICAL CYS HIS RICH THIOREDOXIN 4); oxidoreductase, acting on sulfur group of donors, disulfide as acceptor | chr1:2713604-2714312 FORWARD protein|thioredoxin, putative, expressed	-1.6603
21.1	redox.thioredoxin	i1_LQ_LWC_c10643/f1p89/1978	Transcript	weakly similar to ( 187) AT2G04700 | Symbols: | ferredoxin thioredoxin reductase catalytic beta chain family protein | chr2:1646961-1648345 FORWARDmoderately similar to ( 202) FTRC_MAIZE Ferredoxin-thioredoxin reductase catalytic chain, chloroplast precursor (EC 1.18.-.-) (FTR-C) (Ferredoxin-thioredoxin reductase subunit B) (FTR-B) - Zea mays (Maize)FeThRed_B FtrB protein|ferredoxin-thioredoxin r…	-3.84417
21.1	redox.thioredoxin	i1_HQ_LWC_c27586/f9p0/1920	Transcript	highly similar to ( 741) AT2G41680 | Symbols: NTRC | NTRC (NADPH-DEPENDENT THIOREDOXIN REDUCTASE C); thioredoxin-disulfide reductase | chr2:17376349-17379028 REVERSE TrxB PRK10262 AhpF TRX_NTR Pyr_redox_2 Lpd PRK11749 PRK12831 TRX_family gltD GltD protein|bifunctional thioredoxin reductase/thioredoxin, putative, expressed	3.90959
21.1	redox.thioredoxin	i2_LQ_LWC_c22228/f1p6/2935	Transcript	highly similar to ( 667) AT1G36050 | Symbols: | unknown protein | chr1:13450467-13453055 FORWARD DUF1692 protein|endoplasmic reticulum-Golgi intermediate compartment protein 3, putative, expressed	-8.31439
21.1	redox.thioredoxin	i1_HQ_LWC_c14972/f3p0/1463	Transcript	highly similar to ( 513) AT3G22290 | Symbols: | unknown protein | chr3:7882082-7885260 FORWARD DUF1692 protein|endoplasmic reticulum-Golgi intermediate compartment protein 3, putative, expressed	0
17.8.1	hormone metabolism.salicylic acid.synthesis-degradation	i1_LQ_LWC_c21046/f1p0/1928	Transcript	moderately similar to ( 276) AT3G61360 | Symbols: | pentatricopeptide (PPR) repeat-containing protein | chr3:22704630-22706126 REVERSEweakly similar to ( 101) RF1_ORYSA Rf1 protein, mitochondrial precursor (PPR protein) (Fertility restorer) (Restorer for CMS) - Oryza sativa (Rice) protein|tetratricopeptide-like helical, putative, expressed	-2.22531	SA
30.2	signalling.receptor kinases	i1_HQ_LWC_c16745/f2p0/1796	Transcript	moderately similar to ( 353) AT5G05850 | Symbols: | leucine-rich repeat family protein | chr5:1762691-1764609 REVERSE COG4886 protein|leucine rich repeat containing protein, expressed	11.4521	Receptor kinase
30.2.2	signalling.receptor kinases.leucine rich repeat II	i3_HQ_LWC_c2186/f2p2/3413	Transcript	weakly similar to ( 120) AT1G34210 | Symbols: SERK2, ATSERK2 | SERK2 (SOMATIC EMBRYOGENESIS RECEPTOR-LIKE KINASE 2); kinase | chr1:12459078-12462752 FORWARD protein|disease resistance protein RPM1, putative, expressed	0
30.2.3	signalling.receptor kinases.leucine rich repeat III	i2_HQ_LWC_c65003/f2p0/2685	Transcript	moderately similar to ( 327) AT5G43020 | Symbols: | leucine-rich repeat transmembrane protein kinase, putative | chr5:17255426-17257742 REVERSEweakly similar to ( 119) RPK1_IPONI Receptor-like protein kinase precursor (EC 2.7.11.1) - Ipomoea nil (Japanese morning glory) (Pharbitis nil) Pkinase S_TKc S_TKc Pkinase_Tyr TyrKc PTKc SPS1 PTKc_Src_like PTKc_Srm_Brk PTKc_Src PTKc_Lck_Blk PTKc_Frk_like P…	10.2714
30.2.3	signalling.receptor kinases.leucine rich repeat III	i1_HQ_LWC_c9661/f5p0/1529	Transcript	moderately similar to ( 205) AT5G06860 | Symbols: PGIP1, ATPGIP1 | PGIP1 (POLYGALACTURONASE INHIBITING PROTEIN 1); protein binding | chr5:2132373-2133434 FORWARDweakly similar to ( 187) PGIP1_ORYSA Polygalacturonase inhibitor 1 precursor (Polygalacturonase-inhibiting protein) (Floral organ regulator 1) - Oryza sativa (Rice) protein|polygalacturonase inhibitor precursor, putative, expressed	12.2828
30.2.3	signalling.receptor kinases.leucine rich repeat III	i1_LQ_LWC_c11921/f1p4/1933	Transcript	moderately similar to ( 432) AT1G63430 | Symbols: | leucine-rich repeat transmembrane protein kinase, putative | chr1:23522896-23526451 FORWARDweakly similar to ( 117) PSKR_DAUCA Phytosulfokine receptor precursor (EC 2.7.11.1) (Phytosulfokine LRR receptor kinase) - Daucus carota (Carrot) protein|leucine-rich repeat family protein, putative, expressed	-2.58837
30.2.3	signalling.receptor kinases.leucine rich repeat III	i2_HQ_LWC_c102624/f2p0/2339	Transcript	moderately similar to ( 283) AT3G57830 | Symbols: | leucine-rich repeat transmembrane protein kinase, putative | chr3:21419778-21422320 FORWARDweakly similar to ( 143) PSKR_DAUCA Phytosulfokine receptor precursor (EC 2.7.11.1) (Phytosulfokine LRR receptor kinase) - Daucus carota (Carrot) Pkinase_Tyr PTKc Pkinase TyrKc S_TKc S_TKc SPS1 protein|inactive receptor kinase At2g26730 precursor, putative…	-10.1102
30.2.3	signalling.receptor kinases.leucine rich repeat III	i2_LQ_LWC_c55326/f1p0/2340	Transcript	moderately similar to ( 364) AT4G31250 | Symbols: | leucine-rich repeat transmembrane protein kinase, putative | chr4:15179201-15181751 REVERSEweakly similar to ( 140) PSKR_DAUCA Phytosulfokine receptor precursor (EC 2.7.11.1) (Phytosulfokine LRR receptor kinase) - Daucus carota (Carrot) Pkinase S_TKc S_TKc PTKc Pkinase_Tyr TyrKc PTKc_Src_like PTKc_Srm_Brk SPS1 PTKc_Frk_like protein|inactive rece…	-7.74045
30.2.3	signalling.receptor kinases.leucine rich repeat III	i2_HQ_LWC_c23269/f4p0/2622	Transcript	moderately similar to ( 308) AT1G67510 | Symbols: | leucine-rich repeat family protein | chr1:25297477-25300184 REVERSEweakly similar to ( 103) RPK1_IPONI Receptor-like protein kinase precursor (EC 2.7.11.1) - Ipomoea nil (Japanese morning glory) (Pharbitis nil) protein|receptor protein kinase-like protein At4g34220 precursor, putative, expressed	1.20027
30.2.3	signalling.receptor kinases.leucine rich repeat III	i2_LQ_LWC_c23651/f1p3/2759	Transcript	highly similar to ( 645) AT1G63430 | Symbols: | leucine-rich repeat transmembrane protein kinase, putative | chr1:23522896-23526451 FORWARDweakly similar to ( 167) PSKR_DAUCA Phytosulfokine receptor precursor (EC 2.7.11.1) (Phytosulfokine LRR receptor kinase) - Daucus carota (Carrot) Pkinase_Tyr TyrKc PTKc Pkinase S_TKc protein|expressed protein	1.17386
30.2.3	signalling.receptor kinases.leucine rich repeat III	i3_LQ_LWC_c39535/f1p1/3068	Transcript	moderately similar to ( 460) AT4G34220 | Symbols: | leucine-rich repeat transmembrane protein kinase, putative | chr4:16381653-16384054 REVERSEweakly similar to ( 118) RPK1_IPONI Receptor-like protein kinase precursor (EC 2.7.11.1) - Ipomoea nil (Japanese morning glory) (Pharbitis nil) Pkinase S_TKc S_TKc PTKc Pkinase_Tyr TyrKc protein|transposon protein, putative, unclassified, expressed	0
30.2.3	signalling.receptor kinases.leucine rich repeat III	i3_LQ_LWC_c7520/f1p0/3909	Transcript	moderately similar to ( 463) AT2G27060 | Symbols: | ATP binding / protein binding / protein kinase/ protein serine/threonine kinase/ protein tyrosine kinase | chr2:11551288-11554577 FORWARDweakly similar to ( 149) RPK1_IPONI Receptor-like protein kinase precursor (EC 2.7.11.1) - Ipomoea nil (Japanese morning glory) (Pharbitis nil) TyrKc S_TKc PTKc S_TKc Pkinase_Tyr Pkinase PTKc_Jak_rpt2 protein|e…	6.56696
30.2.3	signalling.receptor kinases.leucine rich repeat III	i2_LQ_LWC_c6674/f7p0/2881	Transcript	highly similar to ( 717) AT3G51740 | Symbols: IMK2 | IMK2 (INFLORESCENCE MERISTEM RECEPTOR-LIKE KINASE 2); ATP binding / kinase/ protein kinase/ protein serine/threonine kinase | chr3:19189248-19191842 FORWARDmoderately similar to ( 242) PSKR_DAUCA Phytosulfokine receptor precursor (EC 2.7.11.1) (Phytosulfokine LRR receptor kinase) - Daucus carota (Carrot) S_TKc Pkinase S_TKc Pkinase_Tyr PTKc Tyr…	0
30.2.3	signalling.receptor kinases.leucine rich repeat III	i2_HQ_LWC_c6512/f2p0/2231	Transcript	moderately similar to ( 397) AT3G17840 | Symbols: RLK902 | RLK902; ATP binding / kinase/ protein serine/threonine kinase | chr3:6106092-6108430 FORWARDweakly similar to ( 119) PSKR_DAUCA Phytosulfokine receptor precursor (EC 2.7.11.1) (Phytosulfokine LRR receptor kinase) - Daucus carota (Carrot) Pkinase S_TKc S_TKc Pkinase_Tyr SPS1 TyrKc PTKc PTKc_Src_like PTKc_Jak_rpt2 PTKc_Csk_like protein|inac…	-2.43339
30.2.3	signalling.receptor kinases.leucine rich repeat III	i2_LQ_LWC_c18809/f1p0/2860	Transcript	nearly identical (1010) AT3G28040 | Symbols: | leucine-rich repeat transmembrane protein kinase, putative | chr3:10435139-10438268 FORWARDmoderately similar to ( 366) PSKR_DAUCA Phytosulfokine receptor precursor (EC 2.7.11.1) (Phytosulfokine LRR receptor kinase) - Daucus carota (Carrot) S_TKc S_TKc Pkinase Pkinase_Tyr PTKc TyrKc PTKc_Ack_like SPS1 PTKc_Jak_rpt2 PTKc_EGFR_like PTKc_Fes_like PTKc_F…	2.9745
30.2.3	signalling.receptor kinases.leucine rich repeat III	i1_LQ_LWC_c20593/f1p1/1983	Transcript	moderately similar to ( 476) AT1G03440 | Symbols: | leucine-rich repeat family protein | chr1:852681-853874 FORWARDweakly similar to ( 119) RPK1_IPONI Receptor-like protein kinase precursor (EC 2.7.11.1) - Ipomoea nil (Japanese morning glory) (Pharbitis nil) protein|receptor-like protein kinase precursor, putative, expressed	-2.54035
30.2.3	signalling.receptor kinases.leucine rich repeat III	i1_LQ_LWC_c13133/f1p0/1246	Transcript	moderately similar to ( 496) AT5G61240 | Symbols: | protein binding | chr5:24629485-24631958 FORWARDweakly similar to ( 125) RPK1_IPONI Receptor-like protein kinase precursor (EC 2.7.11.1) - Ipomoea nil (Japanese morning glory) (Pharbitis nil) protein|leucine-rich repeat resistance protein, putative, expressed	4.04515
30.2.3	signalling.receptor kinases.leucine rich repeat III	i2_HQ_LWC_c3829/f2p1/2411	Transcript	moderately similar to ( 214) AT4G31250 | Symbols: | leucine-rich repeat transmembrane protein kinase, putative | chr4:15179201-15181751 REVERSEvery weakly similar to (97.4) PSKR_DAUCA Phytosulfokine receptor precursor (EC 2.7.11.1) (Phytosulfokine LRR receptor kinase) - Daucus carota (Carrot) protein|receptor kinase, putative, expressed	0
30.2.3	signalling.receptor kinases.leucine rich repeat III	i1_LQ_LWC_c9756/f1p1/1942	Transcript	moderately similar to ( 280) AT1G10850 | Symbols: | ATP binding / protein binding / protein kinase/ protein serine/threonine kinase | chr1:3612228-3614343 FORWARDweakly similar to ( 114) PSKR_DAUCA Phytosulfokine receptor precursor (EC 2.7.11.1) (Phytosulfokine LRR receptor kinase) - Daucus carota (Carrot) Pkinase S_TKc S_TKc PTKc Pkinase_Tyr TyrKc SPS1 PTKc_Ror PTKc_Src_like PTKc_Fes_like PTKc_F…	-10.1627
30.2.3	signalling.receptor kinases.leucine rich repeat III	i2_HQ_LWC_c2378/f3p0/2573	Transcript	moderately similar to ( 415) AT2G36570 | Symbols: | leucine-rich repeat transmembrane protein kinase, putative | chr2:15335583-15337725 FORWARDweakly similar to ( 154) PSKR_DAUCA Phytosulfokine receptor precursor (EC 2.7.11.1) (Phytosulfokine LRR receptor kinase) - Daucus carota (Carrot) Pkinase Pkinase_Tyr TyrKc S_TKc PTKc S_TKc PTKc_Csk_like SPS1 PTKc_Jak_rpt2 PTKc_Src_like PTKc_Fes_like PTKc_F…	0
30.2.8.2	signalling.receptor kinases.leucine rich repeat VIII-2	i11_LQ_LWC_c55/f1p0/11050	Transcript	highly similar to ( 993) AT1G56130 | Symbols: | leucine-rich repeat family protein / protein kinase family protein | chr1:20994931-21000887 REVERSEmoderately similar to ( 214) NORK_PEA Nodulation receptor kinase precursor (EC 2.7.11.1) - Pisum sativum (Garden pea) TyrKc S_TKc Pkinase_Tyr PTKc Pkinase S_TKc PTKc_Jak_rpt2 PTKc_Srm_Brk PTKc_Src_like PTKc_Trk PTKc_Csk_like PTKc_EphR PTKc_Frk_like SPS…	-3.42944
30.2.8.2	signalling.receptor kinases.leucine rich repeat VIII-2	i1_LQ_LWC_c4660/f1p0/1970	Transcript	highly similar to ( 768) AT1G56145 | Symbols: | leucine-rich repeat family protein / protein kinase family protein | chr1:21008225-21013934 REVERSEweakly similar to ( 145) NORK_MEDTR Nodulation receptor kinase precursor (EC 2.7.11.1) (Does not make infections protein 2) (Symbiosis receptor-like kinase) (MtSYMRK) - Medicago truncatula (Barrel medic) TyrKc PTKc Pkinase_Tyr S_TKc S_TKc Pkinase PTKc_…	-7.31105
30.2.8.2	signalling.receptor kinases.leucine rich repeat VIII-2	i3_LQ_LWC_c11494/f1p0/3525	Transcript	highly similar to ( 535) AT1G53440 | Symbols: | leucine-rich repeat family protein / protein kinase family protein | chr1:19945959-19951562 FORWARDweakly similar to ( 122) RPK1_IPONI Receptor-like protein kinase precursor (EC 2.7.11.1) - Ipomoea nil (Japanese morning glory) (Pharbitis nil) protein|leucine-rich repeat-containing protein kinase family protein, putative, expressed	-7.53457
30.2.8.2	signalling.receptor kinases.leucine rich repeat VIII-2	i2_LQ_LWC_c39894/f1p7/2474	Transcript	highly similar to ( 855) AT1G56145 | Symbols: | leucine-rich repeat family protein / protein kinase family protein | chr1:21008225-21013934 REVERSEmoderately similar to ( 209) NORK_PEA Nodulation receptor kinase precursor (EC 2.7.11.1) - Pisum sativum (Garden pea) TyrKc PTKc S_TKc Pkinase_Tyr S_TKc Pkinase PTKc_Jak_rpt2 PTKc_Srm_Brk PTKc_Src_like PTKc_Trk PTKc_Csk_like PTKc_EphR PTKc_Itk PTKc_EGF…	3.02689
30.2.8.2	signalling.receptor kinases.leucine rich repeat VIII-2	i3_LQ_LWC_c14493/f1p0/3089	Transcript	highly similar to ( 947) AT1G56130 | Symbols: | leucine-rich repeat family protein / protein kinase family protein | chr1:20994931-21000887 REVERSEmoderately similar to ( 209) NORK_MEDTR Nodulation receptor kinase precursor (EC 2.7.11.1) (Does not make infections protein 2) (Symbiosis receptor-like kinase) (MtSYMRK) - Medicago truncatula (Barrel medic) TyrKc Pkinase_Tyr S_TKc S_TKc PTKc Pkinase P…	-7.08412
30.2.10	signalling.receptor kinases.leucine rich repeat X	i2_LQ_LWC_c54674/f1p0/2154	Transcript	highly similar to ( 803) AT1G72300 | Symbols: | leucine-rich repeat transmembrane protein kinase, putative | chr1:27217679-27220966 REVERSEhighly similar to ( 673) PSKR_DAUCA Phytosulfokine receptor precursor (EC 2.7.11.1) (Phytosulfokine LRR receptor kinase) - Daucus carota (Carrot) S_TKc Pkinase Pkinase_Tyr S_TKc PTKc TyrKc PTKc_Srm_Brk PTKc_Jak_rpt2 SPS1 PTKc_Src_like PTKc_Frk_like PTKc_Trk PT…	-10.7514
30.2.10	signalling.receptor kinases.leucine rich repeat X	i1_LQ_LWC_c27046/f1p0/1266	Transcript	moderately similar to ( 230) AT3G49750 | Symbols: AtRLP44 | AtRLP44 (Receptor Like Protein 44); protein binding | chr3:18450604-18451428 REVERSE protein|inactive receptor kinase At1g27190 precursor, putative, expressed	0
30.2.11	signalling.receptor kinases.leucine rich repeat XI	i2_HQ_LWC_c2677/f3p0/2998	Transcript	moderately similar to ( 305) AT1G17230 | Symbols: | ATP binding / protein binding / protein kinase/ protein serine/threonine kinase/ protein tyrosine kinase | chr1:5891375-5894855 FORWARDmoderately similar to ( 238) RPK1_IPONI Receptor-like protein kinase precursor (EC 2.7.11.1) - Ipomoea nil (Japanese morning glory) (Pharbitis nil) protein|receptor-like protein kinase 2 precursor, putative, expr…	-7.3732
30.2.11	signalling.receptor kinases.leucine rich repeat XI	i2_HQ_LWC_c12263/f2p2/2790	Transcript	moderately similar to ( 276) AT1G35710 | Symbols: | leucine-rich repeat transmembrane protein kinase, putative | chr1:13220940-13224386 FORWARDmoderately similar to ( 201) RPK1_IPONI Receptor-like protein kinase precursor (EC 2.7.11.1) - Ipomoea nil (Japanese morning glory) (Pharbitis nil) protein|receptor-like protein kinase 5 precursor, putative, expressed	-9.33554
30.2.11	signalling.receptor kinases.leucine rich repeat XI	i3_LQ_LWC_c30879/f1p0/3031	Transcript	highly similar to ( 836) AT1G73080 | Symbols: PEPR1 | PEPR1 (PEP1 receptor 1); ATP binding / kinase/ protein binding / protein serine/threonine kinase | chr1:27484513-27488021 FORWARDhighly similar to ( 880) RPK1_IPONI Receptor-like protein kinase precursor (EC 2.7.11.1) - Ipomoea nil (Japanese morning glory) (Pharbitis nil) S_TKc S_TKc Pkinase Pkinase_Tyr PTKc TyrKc PTKc_Jak_rpt2 SPS1 PTKc_Src_l…	6.74391
30.2.11	signalling.receptor kinases.leucine rich repeat XI	i2_LQ_LWC_c13043/f1p0/2180	Transcript	highly similar to ( 746) AT2G24130 | Symbols: | leucine-rich repeat transmembrane protein kinase, putative | chr2:10258148-10261220 FORWARDmoderately similar to ( 343) PSKR_DAUCA Phytosulfokine receptor precursor (EC 2.7.11.1) (Phytosulfokine LRR receptor kinase) - Daucus carota (Carrot) Pkinase_Tyr S_TKc S_TKc PTKc Pkinase TyrKc PTKc_Src_like PTKc_Frk_like PTKc_Srm_Brk PTKc_Fyn_Yrk PTKc_EphR PTK…	8.88785
30.2.11	signalling.receptor kinases.leucine rich repeat XI	i3_HQ_LWC_c1735/f5p12/3280	Transcript	highly similar to ( 875) AT5G61480 | Symbols: | leucine-rich repeat transmembrane protein kinase, putative | chr5:24724541-24727842 REVERSEmoderately similar to ( 315) PSKR_DAUCA Phytosulfokine receptor precursor (EC 2.7.11.1) (Phytosulfokine LRR receptor kinase) - Daucus carota (Carrot) Pkinase S_TKc S_TKc Pkinase_Tyr PTKc TyrKc SPS1 PTKc_Jak_rpt2 PTKc_Trk PTKc_EphR PTKc_Csk_like PTKc_EGFR_like …	0
30.2.11	signalling.receptor kinases.leucine rich repeat XI	i5_LQ_LWC_c3313/f1p1/5172	Transcript	highly similar to ( 755) AT5G25930 | Symbols: | leucine-rich repeat family protein / protein kinase family protein | chr5:9050880-9053978 FORWARDmoderately similar to ( 358) RPK1_IPONI Receptor-like protein kinase precursor (EC 2.7.11.1) - Ipomoea nil (Japanese morning glory) (Pharbitis nil) S_TKc Pkinase S_TKc PTKc Pkinase_Tyr TyrKc PTKc_Frk_like PTKc_Srm_Brk SPS1 PTKc_Jak_rpt2 PTKc_Ror PTKc_Src…	2.10985
30.2.11	signalling.receptor kinases.leucine rich repeat XI	i2_LQ_LWC_c54674/f1p0/2154	Transcript	highly similar to ( 803) AT1G72300 | Symbols: | leucine-rich repeat transmembrane protein kinase, putative | chr1:27217679-27220966 REVERSEhighly similar to ( 673) PSKR_DAUCA Phytosulfokine receptor precursor (EC 2.7.11.1) (Phytosulfokine LRR receptor kinase) - Daucus carota (Carrot) S_TKc Pkinase Pkinase_Tyr S_TKc PTKc TyrKc PTKc_Srm_Brk PTKc_Jak_rpt2 SPS1 PTKc_Src_like PTKc_Frk_like PTKc_Trk PT…	-10.7514
30.2.11	signalling.receptor kinases.leucine rich repeat XI	i3_HQ_LWC_c17800/f2p0/3154	Transcript	highly similar to ( 639) AT4G20140 | Symbols: GSO1 | GSO1 (GASSHO1); ATP binding / protein binding / protein kinase/ protein serine/threonine kinase/ protein tyrosine kinase | chr4:10884220-10888045 FORWARDmoderately similar to ( 314) RPK1_IPONI Receptor-like protein kinase precursor (EC 2.7.11.1) - Ipomoea nil (Japanese morning glory) (Pharbitis nil) protein|leucine-rich repeat receptor protein …	10.4274
30.2.11	signalling.receptor kinases.leucine rich repeat XI	i2_LQ_LWC_c51964/f1p0/2403	Transcript	nearly identical (1196) AT1G34110 | Symbols: | leucine-rich repeat transmembrane protein kinase, putative | chr1:12417331-12421189 REVERSEmoderately similar to ( 500) RPK1_IPONI Receptor-like protein kinase precursor (EC 2.7.11.1) - Ipomoea nil (Japanese morning glory) (Pharbitis nil) Pkinase Pkinase_Tyr TyrKc S_TKc S_TKc PTKc PTKc_Jak_rpt2 PTKc_Src_like SPS1 PTKc_Trk PTKc_Srm_Brk PTKc_DDR PTKc_F…	7.44629
30.2.11	signalling.receptor kinases.leucine rich repeat XI	i3_LQ_LWC_c35885/f1p0/3594	Transcript	highly similar to ( 906) AT4G20270 | Symbols: BAM3 | BAM3 (BARELY ANY MERISTEM 3); ATP binding / protein binding / protein kinase/ protein serine/threonine kinase | chr4:10949822-10952924 FORWARDmoderately similar to ( 289) RPK1_IPONI Receptor-like protein kinase precursor (EC 2.7.11.1) - Ipomoea nil (Japanese morning glory) (Pharbitis nil) S_TKc TyrKc Pkinase S_TKc PTKc Pkinase_Tyr PTKc_Src_like…	-4.28146
30.2.11	signalling.receptor kinases.leucine rich repeat XI	i2_LQ_LWC_c23651/f1p3/2759	Transcript	highly similar to ( 645) AT1G63430 | Symbols: | leucine-rich repeat transmembrane protein kinase, putative | chr1:23522896-23526451 FORWARDweakly similar to ( 167) PSKR_DAUCA Phytosulfokine receptor precursor (EC 2.7.11.1) (Phytosulfokine LRR receptor kinase) - Daucus carota (Carrot) Pkinase_Tyr TyrKc PTKc Pkinase S_TKc protein|expressed protein	1.17386
30.2.11	signalling.receptor kinases.leucine rich repeat XI	i1_LQ_LWC_c35300/f1p0/1826	Transcript	moderately similar to ( 380) AT4G35470 | Symbols: | leucine-rich repeat family protein | chr4:16846531-16848448 FORWARDvery weakly similar to (90.1) RPK1_IPONI Receptor-like protein kinase precursor (EC 2.7.11.1) - Ipomoea nil (Japanese morning glory) (Pharbitis nil) COG4886 protein|leucine rich repeat containing protein, expressed	-4.68135
30.2.11	signalling.receptor kinases.leucine rich repeat XI	i2_LQ_LWC_c17379/f1p49/2688	Transcript	highly similar to ( 679) AT3G47570 | Symbols: | leucine-rich repeat transmembrane protein kinase, putative | chr3:17527611-17530748 FORWARDmoderately similar to ( 378) RPK1_IPONI Receptor-like protein kinase precursor (EC 2.7.11.1) - Ipomoea nil (Japanese morning glory) (Pharbitis nil) S_TKc S_TKc Pkinase Pkinase_Tyr TyrKc PTKc PTKc_Srm_Brk PTKc_Csk_like PTKc_Src_like PTKc_Trk PTKc_Abl PTKc_Chk P…	0
30.2.11	signalling.receptor kinases.leucine rich repeat XI	i2_HQ_LWC_c4129/f2p3/2892	Transcript	nearly identical (1098) AT1G28440 | Symbols: HSL1 | HSL1 (HAESA-Like 1); ATP binding / kinase/ protein serine/threonine kinase | chr1:9996914-10000171 FORWARDmoderately similar to ( 447) RPK1_IPONI Receptor-like protein kinase precursor (EC 2.7.11.1) - Ipomoea nil (Japanese morning glory) (Pharbitis nil) S_TKc S_TKc Pkinase Pkinase_Tyr TyrKc PTKc PTKc_Jak_rpt2 PTKc_Src_like SPS1 PTKc_Csk_like PTK…	10.6895
30.2.11	signalling.receptor kinases.leucine rich repeat XI	i2_LQ_LWC_c65565/f1p0/2863	Transcript	nearly identical (1300) AT5G65700 | Symbols: BAM1 | BAM1 (BARELY ANY MERISTEM 1); ATP binding / kinase/ protein serine/threonine kinase | chr5:26281826-26284945 FORWARDmoderately similar to ( 460) RPK1_IPONI Receptor-like protein kinase precursor (EC 2.7.11.1) - Ipomoea nil (Japanese morning glory) (Pharbitis nil) Pkinase_Tyr S_TKc TyrKc Pkinase S_TKc PTKc PTKc_Jak_rpt2 PTKc_EphR PTKc_Src_like SP…	0
30.2.11	signalling.receptor kinases.leucine rich repeat XI	i3_LQ_LWC_c6115/f1p2/3586	Transcript	nearly identical (1251) AT2G01950 | Symbols: VH1, BRL2 | BRL2 (BRI1-LIKE 2); ATP binding / protein serine/threonine kinase/ transmembrane receptor protein serine/threonine kinase | chr2:440805-444236 REVERSEmoderately similar to ( 474) PSKR_DAUCA Phytosulfokine receptor precursor (EC 2.7.11.1) (Phytosulfokine LRR receptor kinase) - Daucus carota (Carrot) PTKc Pkinase_Tyr S_TKc TyrKc S_TKc Pkinase…	-3.32108
30.2.11	signalling.receptor kinases.leucine rich repeat XI	i3_HQ_LWC_c13008/f3p2/3462	Transcript	highly similar to ( 537) AT3G47570 | Symbols: | leucine-rich repeat transmembrane protein kinase, putative | chr3:17527611-17530748 FORWARDmoderately similar to ( 343) RPK1_IPONI Receptor-like protein kinase precursor (EC 2.7.11.1) - Ipomoea nil (Japanese morning glory) (Pharbitis nil) Pkinase S_TKc S_TKc TyrKc Pkinase_Tyr PTKc PTKc_Jak_rpt2 PTKc_Csk_like PTKc_Srm_Brk protein|receptor-like protei…	-5.65127
30.2.11	signalling.receptor kinases.leucine rich repeat XI	i2_LQ_LWC_c12057/f1p0/2749	Transcript	nearly identical (1168) AT1G55610 | Symbols: BRL1 | BRL1 (BRI 1 LIKE); kinase | chr1:20779874-20783374 REVERSEmoderately similar to ( 459) PSKR_DAUCA Phytosulfokine receptor precursor (EC 2.7.11.1) (Phytosulfokine LRR receptor kinase) - Daucus carota (Carrot) Pkinase_Tyr Pkinase TyrKc S_TKc PTKc S_TKc SPS1 PTKc_Jak_rpt2 PTKc_EphR PTKc_Trk PTKc_TrkB PTKc_Syk_like PTKc_EGFR_like PTKc_Csk_like PTKc_…	0
30.2.11	signalling.receptor kinases.leucine rich repeat XI	i3_HQ_LWC_c10402/f3p0/3904	Transcript	highly similar to ( 520) AT3G47570 | Symbols: | leucine-rich repeat transmembrane protein kinase, putative | chr3:17527611-17530748 FORWARDmoderately similar to ( 372) RPK1_IPONI Receptor-like protein kinase precursor (EC 2.7.11.1) - Ipomoea nil (Japanese morning glory) (Pharbitis nil) Pkinase S_TKc S_TKc Pkinase_Tyr TyrKc PTKc PTKc_Csk_like PTKc_Jak_rpt2 PTKc_Srm_Brk PTKc_Src_like PTKc_Axl_like …	5.45512
30.2.11	signalling.receptor kinases.leucine rich repeat XI	i2_LQ_LWC_c18809/f1p0/2860	Transcript	nearly identical (1010) AT3G28040 | Symbols: | leucine-rich repeat transmembrane protein kinase, putative | chr3:10435139-10438268 FORWARDmoderately similar to ( 366) PSKR_DAUCA Phytosulfokine receptor precursor (EC 2.7.11.1) (Phytosulfokine LRR receptor kinase) - Daucus carota (Carrot) S_TKc S_TKc Pkinase Pkinase_Tyr PTKc TyrKc PTKc_Ack_like SPS1 PTKc_Jak_rpt2 PTKc_EGFR_like PTKc_Fes_like PTKc_F…	2.9745
30.2.11	signalling.receptor kinases.leucine rich repeat XI	i2_LQ_LWC_c103232/f1p1/2875	Transcript	highly similar to ( 777) AT3G56370 | Symbols: | leucine-rich repeat transmembrane protein kinase, putative | chr3:20899403-20902390 REVERSEweakly similar to ( 198) RPK1_IPONI Receptor-like protein kinase precursor (EC 2.7.11.1) - Ipomoea nil (Japanese morning glory) (Pharbitis nil) Pkinase_Tyr PTKc S_TKc Pkinase TyrKc S_TKc PTKc_Jak_rpt2 SPS1 PTKc_EphR PTKc_Fes_like PTKc_EGFR_like PTKc_Trk PTKc_c…	-1.96717
30.2.11	signalling.receptor kinases.leucine rich repeat XI	i2_LQ_LWC_c108899/f1p1/2328	Transcript	nearly identical (1021) AT4G36180 | Symbols: | leucine-rich repeat family protein | chr4:17120209-17123698 REVERSEmoderately similar to ( 315) RPK1_IPONI Receptor-like protein kinase precursor (EC 2.7.11.1) - Ipomoea nil (Japanese morning glory) (Pharbitis nil) Pkinase S_TKc S_TKc PTKc Pkinase_Tyr TyrKc SPS1 PTKc_Jak_rpt2 COG4886 PTKc_Src_like PTKc_Trk PTKc_EphR protein|leucine-rich repeat family…	10.6358
30.2.11	signalling.receptor kinases.leucine rich repeat XI	i1_LQ_LWC_c13133/f1p0/1246	Transcript	moderately similar to ( 496) AT5G61240 | Symbols: | protein binding | chr5:24629485-24631958 FORWARDweakly similar to ( 125) RPK1_IPONI Receptor-like protein kinase precursor (EC 2.7.11.1) - Ipomoea nil (Japanese morning glory) (Pharbitis nil) protein|leucine-rich repeat resistance protein, putative, expressed	4.04515
30.2.11	signalling.receptor kinases.leucine rich repeat XI	i4_LQ_LWC_c25586/f1p8/4847	Transcript	highly similar to ( 658) AT3G47570 | Symbols: | leucine-rich repeat transmembrane protein kinase, putative | chr3:17527611-17530748 FORWARDmoderately similar to ( 328) RPK1_IPONI Receptor-like protein kinase precursor (EC 2.7.11.1) - Ipomoea nil (Japanese morning glory) (Pharbitis nil) TyrKc Pkinase S_TKc Pkinase_Tyr S_TKc PTKc PTKc_Jak_rpt2 PTKc_Src_like PTKc_EphR PTKc_Srm_Brk PTKc_Frk_like PTKc…	6.61982
30.2.11	signalling.receptor kinases.leucine rich repeat XI	i3_HQ_LWC_c2614/f2p0/3366	Transcript	moderately similar to ( 321) AT3G47570 | Symbols: | leucine-rich repeat transmembrane protein kinase, putative | chr3:17527611-17530748 FORWARDmoderately similar to ( 213) RPK1_IPONI Receptor-like protein kinase precursor (EC 2.7.11.1) - Ipomoea nil (Japanese morning glory) (Pharbitis nil) protein|receptor-like protein kinase 2 precursor, putative, expressed	12.4634
30.2.11	signalling.receptor kinases.leucine rich repeat XI	i3_LQ_LWC_c21002/f1p1/3234	Transcript	moderately similar to ( 294) AT5G21090 | Symbols: | leucine-rich repeat protein, putative | chr5:7164758-7166904 FORWARDweakly similar to ( 105) RPK1_IPONI Receptor-like protein kinase precursor (EC 2.7.11.1) - Ipomoea nil (Japanese morning glory) (Pharbitis nil) protein|BRASSINOSTEROID INSENSITIVE 1-associated receptor kinase 1 precursor, putative, expressed	10.7697
30.2.11	signalling.receptor kinases.leucine rich repeat XI	i1_LQ_LWC_c7096/f1p0/1821	Transcript	highly similar to ( 758) AT1G09970 | Symbols: LRR XI-23 | LRR XI-23; ATP binding / kinase/ protein kinase/ protein serine/threonine kinase | chr1:3252408-3255428 FORWARDmoderately similar to ( 225) RPK1_IPONI Receptor-like protein kinase precursor (EC 2.7.11.1) - Ipomoea nil (Japanese morning glory) (Pharbitis nil) S_TKc Pkinase S_TKc TyrKc Pkinase_Tyr PTKc SPS1 PTKc_Jak_rpt2 PTKc_Src_like PTKc_E…	-5.07386
30.2.11	signalling.receptor kinases.leucine rich repeat XI	i3_LQ_LWC_c10289/f1p0/3764	Transcript	highly similar to ( 859) AT5G65700 | Symbols: BAM1 | BAM1 (BARELY ANY MERISTEM 1); ATP binding / kinase/ protein serine/threonine kinase | chr5:26281826-26284945 FORWARDmoderately similar to ( 227) RPK1_IPONI Receptor-like protein kinase precursor (EC 2.7.11.1) - Ipomoea nil (Japanese morning glory) (Pharbitis nil) S_TKc Pkinase_Tyr Pkinase S_TKc PTKc TyrKc SPS1 PTKc_Jak_rpt2 PTKc_Src_like PTKc_S…	7.04688
30.2.11	signalling.receptor kinases.leucine rich repeat XI	i2_LQ_LWC_c90251/f1p1/2275	Transcript	nearly identical (1038) AT4G28650 | Symbols: | leucine-rich repeat transmembrane protein kinase, putative | chr4:14144155-14147276 REVERSEmoderately similar to ( 334) PSKR_DAUCA Phytosulfokine receptor precursor (EC 2.7.11.1) (Phytosulfokine LRR receptor kinase) - Daucus carota (Carrot) S_TKc Pkinase S_TKc Pkinase_Tyr TyrKc PTKc PTKc_EphR SPS1 PTKc_Src_like PTKc_Abl PTKc_Tec_like PTKc_EphR_A2 PTK…	10.5766
30.2.11	signalling.receptor kinases.leucine rich repeat XI	i1_LQ_LWC_c6943/f1p0/1520	Transcript	highly similar to ( 931) AT1G75820 | Symbols: CLV1, FAS3, FLO5 | CLV1 (CLAVATA 1); ATP binding / kinase/ protein serine/threonine kinase/ receptor signaling protein serine/threonine kinase | chr1:28463631-28466652 REVERSEmoderately similar to ( 244) RPK1_IPONI Receptor-like protein kinase precursor (EC 2.7.11.1) - Ipomoea nil (Japanese morning glory) (Pharbitis nil) Pkinase_Tyr S_TKc S_TKc Pkinas…	-10.2733
30.2.12	signalling.receptor kinases.leucine rich repeat XII	i2_LQ_LWC_c13043/f1p0/2180	Transcript	highly similar to ( 746) AT2G24130 | Symbols: | leucine-rich repeat transmembrane protein kinase, putative | chr2:10258148-10261220 FORWARDmoderately similar to ( 343) PSKR_DAUCA Phytosulfokine receptor precursor (EC 2.7.11.1) (Phytosulfokine LRR receptor kinase) - Daucus carota (Carrot) Pkinase_Tyr S_TKc S_TKc PTKc Pkinase TyrKc PTKc_Src_like PTKc_Frk_like PTKc_Srm_Brk PTKc_Fyn_Yrk PTKc_EphR PTK…	8.88785
30.2.12	signalling.receptor kinases.leucine rich repeat XII	i2_LQ_LWC_c17379/f1p49/2688	Transcript	highly similar to ( 679) AT3G47570 | Symbols: | leucine-rich repeat transmembrane protein kinase, putative | chr3:17527611-17530748 FORWARDmoderately similar to ( 378) RPK1_IPONI Receptor-like protein kinase precursor (EC 2.7.11.1) - Ipomoea nil (Japanese morning glory) (Pharbitis nil) S_TKc S_TKc Pkinase Pkinase_Tyr TyrKc PTKc PTKc_Srm_Brk PTKc_Csk_like PTKc_Src_like PTKc_Trk PTKc_Abl PTKc_Chk P…	0
30.2.12	signalling.receptor kinases.leucine rich repeat XII	i3_HQ_LWC_c13008/f3p2/3462	Transcript	highly similar to ( 537) AT3G47570 | Symbols: | leucine-rich repeat transmembrane protein kinase, putative | chr3:17527611-17530748 FORWARDmoderately similar to ( 343) RPK1_IPONI Receptor-like protein kinase precursor (EC 2.7.11.1) - Ipomoea nil (Japanese morning glory) (Pharbitis nil) Pkinase S_TKc S_TKc TyrKc Pkinase_Tyr PTKc PTKc_Jak_rpt2 PTKc_Csk_like PTKc_Srm_Brk protein|receptor-like protei…	-5.65127
30.2.12	signalling.receptor kinases.leucine rich repeat XII	i3_HQ_LWC_c10402/f3p0/3904	Transcript	highly similar to ( 520) AT3G47570 | Symbols: | leucine-rich repeat transmembrane protein kinase, putative | chr3:17527611-17530748 FORWARDmoderately similar to ( 372) RPK1_IPONI Receptor-like protein kinase precursor (EC 2.7.11.1) - Ipomoea nil (Japanese morning glory) (Pharbitis nil) Pkinase S_TKc S_TKc Pkinase_Tyr TyrKc PTKc PTKc_Csk_like PTKc_Jak_rpt2 PTKc_Srm_Brk PTKc_Src_like PTKc_Axl_like …	5.45512
30.2.12	signalling.receptor kinases.leucine rich repeat XII	i4_LQ_LWC_c25586/f1p8/4847	Transcript	highly similar to ( 658) AT3G47570 | Symbols: | leucine-rich repeat transmembrane protein kinase, putative | chr3:17527611-17530748 FORWARDmoderately similar to ( 328) RPK1_IPONI Receptor-like protein kinase precursor (EC 2.7.11.1) - Ipomoea nil (Japanese morning glory) (Pharbitis nil) TyrKc Pkinase S_TKc Pkinase_Tyr S_TKc PTKc PTKc_Jak_rpt2 PTKc_Src_like PTKc_EphR PTKc_Srm_Brk PTKc_Frk_like PTKc…	6.61982
30.2.16	signalling.receptor kinases.Catharanthus roseus-like RLK1	i1_HQ_LWC_c1393/f5p0/1746	Transcript	moderately similar to ( 244) AT4G00300 | Symbols: | fringe-related protein | chr4:126509-130126 FORWARD protein|receptor-like protein kinase At3g46290 precursor, putative, expressed	12.989
30.2.16	signalling.receptor kinases.Catharanthus roseus-like RLK1	i2_LQ_LWC_c36427/f1p0/2815	Transcript	highly similar to ( 840) AT1G30570 | Symbols: | protein kinase family protein | chr1:10828933-10831482 FORWARDmoderately similar to ( 244) NORK_MEDTR Nodulation receptor kinase precursor (EC 2.7.11.1) (Does not make infections protein 2) (Symbiosis receptor-like kinase) (MtSYMRK) - Medicago truncatula (Barrel medic) TyrKc S_TKc S_TKc PTKc Pkinase_Tyr Pkinase PTKc_Trk PTKc_Jak_rpt2 PTKc_Csk_like P…	-2.02789
30.2.16	signalling.receptor kinases.Catharanthus roseus-like RLK1	i1_HQ_LWC_c4970/f4p1/1763	Transcript	moderately similar to ( 350) AT3G51550 | Symbols: FER | FER (FERONIA); kinase/ protein kinase | chr3:19117877-19120564 REVERSE protein|FERONIA receptor-like kinase, putative, expressed	4.14024
30.2.17	signalling.receptor kinases.DUF 26	i1_LQ_LWC_c17981/f1p4/1595	Transcript	weakly similar to ( 139) AT4G23160 | Symbols: | protein kinase family protein | chr4:12129485-12134086 FORWARDmoderately similar to ( 462) POLX_TOBAC Retrovirus-related Pol polyprotein from transposon TNT 1-94 [Includes: Protease (EC 3.4.23.-); Reverse transcriptase (EC 2.7.7.49); Endonuclease] - Nicotiana tabacum (Common tobacco)RVT_2 rve protein|retrotransposon protein, putative, Ty1-copia subc…	5.76964
30.2.17	signalling.receptor kinases.DUF 26	i2_LQ_LWC_c127067/f8p0/2391	Transcript	highly similar to ( 620) AT5G51560 | Symbols: | leucine-rich repeat transmembrane protein kinase, putative | chr5:20945807-20948613 FORWARDweakly similar to ( 179) PSKR_DAUCA Phytosulfokine receptor precursor (EC 2.7.11.1) (Phytosulfokine LRR receptor kinase) - Daucus carota (Carrot) TyrKc PTKc Pkinase_Tyr PTKc_Jak_rpt2 S_TKc PTK_CCK4 Pkinase S_TKc PTKc_Jak2_Jak3_rpt2 PTKc_DDR PTKc_Srm_Brk PTKc_B…	0
30.2.17	signalling.receptor kinases.DUF 26	i2_HQ_LWC_c78402/f8p1/2229	Transcript	highly similar to ( 554) AT1G11050 | Symbols: | protein kinase family protein | chr1:3681892-3683769 FORWARDmoderately similar to ( 207) NORK_MEDTR Nodulation receptor kinase precursor (EC 2.7.11.1) (Does not make infections protein 2) (Symbiosis receptor-like kinase) (MtSYMRK) - Medicago truncatula (Barrel medic) S_TKc S_TKc TyrKc Pkinase_Tyr Pkinase PTKc PTKc_Csk_like SPS1 PTKc_Jak_rpt2 PTKc_Tr…	7.39721
30.2.17	signalling.receptor kinases.DUF 26	i2_LQ_LWC_c35262/f1p2/2614	Transcript	moderately similar to ( 395) AT4G23160 | Symbols: | protein kinase family protein | chr4:12129485-12134086 FORWARDmoderately similar to ( 367) POLX_TOBAC Retrovirus-related Pol polyprotein from transposon TNT 1-94 [Includes: Protease (EC 3.4.23.-); Reverse transcriptase (EC 2.7.7.49); Endonuclease] - Nicotiana tabacum (Common tobacco)RVT_2 protein|retrotransposon protein, putative, unclassified, …	9.52881
30.2.19	signalling.receptor kinases.legume-lectin	i2_LQ_LWC_c25941/f1p0/2167	Transcript	highly similar to ( 667) AT2G37710 | Symbols: RLK | RLK (receptor lectin kinase); kinase | chr2:15814934-15816961 REVERSEweakly similar to ( 195) PSKR_DAUCA Phytosulfokine receptor precursor (EC 2.7.11.1) (Phytosulfokine LRR receptor kinase) - Daucus carota (Carrot) Lectin_legB S_TKc S_TKc PTKc Pkinase Pkinase_Tyr TyrKc PTKc_Csk_like SPS1 PTKc_Jak_rpt2 PTKc_EphR PTKc_Srm_Brk PTKc_Abl PTKc_EGFR_li…	0
30.2.19	signalling.receptor kinases.legume-lectin	i2_LQ_LWC_c22393/f1p0/2287	Transcript	highly similar to ( 582) AT2G37710 | Symbols: RLK | RLK (receptor lectin kinase); kinase | chr2:15814934-15816961 REVERSEweakly similar to ( 196) PSKR_DAUCA Phytosulfokine receptor precursor (EC 2.7.11.1) (Phytosulfokine LRR receptor kinase) - Daucus carota (Carrot) Lectin_legB Pkinase S_TKc S_TKc Pkinase_Tyr TyrKc PTKc PTKc_EphR PTKc_Jak_rpt2 SPS1 PTKc_EphR_A2 PTKc_Tec_like PTKc_Srm_Brk PTKc_Frk…	5.50671
30.2.19	signalling.receptor kinases.legume-lectin	i2_HQ_LWC_c53311/f2p1/2432	Transcript	highly similar to ( 568) AT5G55830 | Symbols: | lectin protein kinase, putative | chr5:22594655-22596700 FORWARDmoderately similar to ( 204) PSKR_DAUCA Phytosulfokine receptor precursor (EC 2.7.11.1) (Phytosulfokine LRR receptor kinase) - Daucus carota (Carrot) Lectin_legB Pkinase Pkinase_Tyr PTKc S_TKc TyrKc S_TKc SPS1 PTKc_Jak_rpt2 PTKc_EphR PTKc_EphR_A2 PTKc_Src_like PTKc_EGFR_like PTKc_EphR_A…	-1.97725
30.2.19	signalling.receptor kinases.legume-lectin	i2_LQ_LWC_c17530/f1p4/2405	Transcript	highly similar to ( 650) AT3G53810 | Symbols: | lectin protein kinase, putative | chr3:19933153-19935186 REVERSEmoderately similar to ( 221) PSKR_DAUCA Phytosulfokine receptor precursor (EC 2.7.11.1) (Phytosulfokine LRR receptor kinase) - Daucus carota (Carrot) Lectin_legB Pkinase S_TKc S_TKc TyrKc Pkinase_Tyr PTKc SPS1 PTKc_EphR PTKc_Jak_rpt2 PTKc_Srm_Brk PTKc_Csk_like PTKc_Frk_like PTKc_Abl PTK…	-6.01618
30.2.22	signalling.receptor kinases.proline extensin like	i1_LQ_LWC_c30595/f1p0/1623	Transcript	highly similar to ( 587) AT3G24550 | Symbols: ATPERK1 | ATPERK1 (PROLINE EXTENSIN-LIKE RECEPTOR KINASE 1); ATP binding / protein kinase | chr3:8960411-8963303 FORWARDmoderately similar to ( 235) PSKR_DAUCA Phytosulfokine receptor precursor (EC 2.7.11.1) (Phytosulfokine LRR receptor kinase) - Daucus carota (Carrot) TyrKc Pkinase_Tyr PTKc S_TKc S_TKc Pkinase PTKc_Jak_rpt2 PTKc_Csk_like PTKc_Src_lik…	-7.81533
30.2.22	signalling.receptor kinases.proline extensin like	i11_LQ_LWC_c33/f1p0/11424	Transcript	highly similar to ( 785) AT5G10290 | Symbols: | leucine-rich repeat family protein / protein kinase family protein | chr5:3235462-3238171 REVERSEmoderately similar to ( 215) PSKR_DAUCA Phytosulfokine receptor precursor (EC 2.7.11.1) (Phytosulfokine LRR receptor kinase) - Daucus carota (Carrot) PTKc Pkinase_Tyr TyrKc S_TKc Pkinase S_TKc PTKc_Csk_like PTKc_Jak_rpt2 PTKc_EGFR_like PTKc_InsR_like PTK…	-11.6491
30.2.22	signalling.receptor kinases.proline extensin like	i2_HQ_LWC_c127271/f13p4/2225	Transcript	highly similar to ( 526) AT5G10290 | Symbols: | leucine-rich repeat family protein / protein kinase family protein | chr5:3235462-3238171 REVERSEmoderately similar to ( 209) PSKR_DAUCA Phytosulfokine receptor precursor (EC 2.7.11.1) (Phytosulfokine LRR receptor kinase) - Daucus carota (Carrot) Pkinase_Tyr TyrKc PTKc Pkinase S_TKc S_TKc PTKc_Met_Ron PTKc_InsR_like PTKc_Fes_like PTKc_Jak_rpt2 PTKc_…	3.37422
30.2.24	signalling.receptor kinases.S-locus glycoprotein like	i1_HQ_LWC_c16522/f2p0/1760	Transcript	weakly similar to ( 119) AT4G00960 | Symbols: | protein kinase family protein | chr4:414361-416180 FORWARD protein|TKL_IRAK_DUF26-lg.1 - DUF26 kinases have homology to DUF26 containing loci, expressed	1.54596
30.2.24	signalling.receptor kinases.S-locus glycoprotein like	i2_HQ_LWC_c9586/f2p0/2372	Transcript	moderately similar to ( 472) AT4G23160 | Symbols: | protein kinase family protein | chr4:12129485-12134086 FORWARDmoderately similar to ( 205) NORK_MEDTR Nodulation receptor kinase precursor (EC 2.7.11.1) (Does not make infections protein 2) (Symbiosis receptor-like kinase) (MtSYMRK) - Medicago truncatula (Barrel medic) TyrKc Pkinase S_TKc S_TKc PTKc Pkinase_Tyr PTKc_Srm_Brk PTKc_Jak_rpt2 PTKc_Sr…	-3.00288
30.2.24	signalling.receptor kinases.S-locus glycoprotein like	i2_LQ_LWC_c113283/f1p2/2088	Transcript	moderately similar to ( 436) AT4G23180 | Symbols: CRK10, RLK4 | CRK10 (CYSTEINE-RICH RLK10); ATP binding / kinase/ protein kinase/ protein serine/threonine kinase/ protein tyrosine kinase | chr4:12138171-12140780 FORWARDweakly similar to ( 198) NORK_MEDTR Nodulation receptor kinase precursor (EC 2.7.11.1) (Does not make infections protein 2) (Symbiosis receptor-like kinase) (MtSYMRK) - Medicago t…	8.5799
30.2.24	signalling.receptor kinases.S-locus glycoprotein like	i3_HQ_LWC_c10430/f2p3/3387	Transcript	highly similar to ( 756) AT1G56130 | Symbols: | leucine-rich repeat family protein / protein kinase family protein | chr1:20994931-21000887 REVERSEweakly similar to ( 191) NORK_PEA Nodulation receptor kinase precursor (EC 2.7.11.1) - Pisum sativum (Garden pea) TyrKc Pkinase_Tyr PTKc S_TKc S_TKc Pkinase PTKc_Srm_Brk PTKc_Jak_rpt2 PTKc_Trk PTKc_Csk_like PTKc_Src_like PTKc_EphR PTKc_Itk PTKc_Tec_lik…	7.21498
30.2.24	signalling.receptor kinases.S-locus glycoprotein like	i1_LQ_LWC_c20151/f1p2/1694	Transcript	highly similar to ( 850) AT1G34300 | Symbols: | lectin protein kinase family protein | chr1:12503450-12505939 FORWARDmoderately similar to ( 252) KPRO_MAIZE Putative receptor protein kinase ZmPK1 precursor (EC 2.7.11.1) - Zea mays (Maize) Pkinase S_TKc S_TKc Pkinase_Tyr TyrKc PTKc PTKc_Src_like SPS1 PTKc_Frk_like PTKc_Csk_like PTKc_EphR PTKc_Jak_rpt2 PTKc_Srm_Brk PTKc_Ror PTKc_Fes_like PTKc_Abl P…	4.38888
30.2.24	signalling.receptor kinases.S-locus glycoprotein like	i0_LQ_LWC_c1802/f1p0/719	Transcript	highly similar to ( 588) AT4G21390 | Symbols: B120 | B120; ATP binding / protein kinase/ protein serine/threonine kinase/ sugar binding | chr4:11394458-11397474 REVERSEmoderately similar to ( 245) KPRO_MAIZE Putative receptor protein kinase ZmPK1 precursor (EC 2.7.11.1) - Zea mays (Maize) TyrKc Pkinase_Tyr PTKc Pkinase S_TKc S_TKc PTKc_Jak_rpt2 PTKc_Src_like PTKc_Srm_Brk SPS1 PTKc_Ror PTKc_Lck_Bl…	-10.1282
30.2.24	signalling.receptor kinases.S-locus glycoprotein like	i1_LQ_LWC_c19065/f1p2/1684	Transcript	moderately similar to ( 459) AT4G23180 | Symbols: CRK10, RLK4 | CRK10 (CYSTEINE-RICH RLK10); ATP binding / kinase/ protein kinase/ protein serine/threonine kinase/ protein tyrosine kinase | chr4:12138171-12140780 FORWARDmoderately similar to ( 202) NORK_MEDTR Nodulation receptor kinase precursor (EC 2.7.11.1) (Does not make infections protein 2) (Symbiosis receptor-like kinase) (MtSYMRK) - Medica…	8.26079
30.2.24	signalling.receptor kinases.S-locus glycoprotein like	i2_HQ_LWC_c35936/f2p0/2615	Transcript	moderately similar to ( 307) AT4G23180 | Symbols: CRK10, RLK4 | CRK10 (CYSTEINE-RICH RLK10); ATP binding / kinase/ protein kinase/ protein serine/threonine kinase/ protein tyrosine kinase | chr4:12138171-12140780 FORWARDweakly similar to ( 142) NORK_MEDTR Nodulation receptor kinase precursor (EC 2.7.11.1) (Does not make infections protein 2) (Symbiosis receptor-like kinase) (MtSYMRK) - Medicago t…	-1.98759
30.2.24	signalling.receptor kinases.S-locus glycoprotein like	i2_LQ_LWC_c25720/f1p0/2639	Transcript	moderately similar to ( 373) AT1G34300 | Symbols: | lectin protein kinase family protein | chr1:12503450-12505939 FORWARDhighly similar to ( 638) KPRO_MAIZE Putative receptor protein kinase ZmPK1 precursor (EC 2.7.11.1) - Zea mays (Maize) Pkinase S_TKc S_TKc TyrKc Pkinase_Tyr PTKc PTKc_Csk_like SPS1 PTKc_Src_like PTKc_Jak_rpt2 PTKc_Srm_Brk PTKc_Frk_like PTKc_Itk PTKc_EphR B_lectin B_lectin PTKc_E…	-8.3638
30.2.24	signalling.receptor kinases.S-locus glycoprotein like	i1_LQ_LWC_c31252/f1p0/1963	Transcript	moderately similar to ( 428) AT1G16670 | Symbols: | protein kinase family protein | chr1:5697846-5699492 FORWARDmoderately similar to ( 206) NORK_MEDTR Nodulation receptor kinase precursor (EC 2.7.11.1) (Does not make infections protein 2) (Symbiosis receptor-like kinase) (MtSYMRK) - Medicago truncatula (Barrel medic) Pkinase_Tyr TyrKc PTKc S_TKc S_TKc Pkinase PTKc_Srm_Brk PTKc_Src_like PTKc_Csk_…	-0.7097
30.2.24	signalling.receptor kinases.S-locus glycoprotein like	i11_LQ_LWC_c33/f1p0/11424	Transcript	highly similar to ( 785) AT5G10290 | Symbols: | leucine-rich repeat family protein / protein kinase family protein | chr5:3235462-3238171 REVERSEmoderately similar to ( 215) PSKR_DAUCA Phytosulfokine receptor precursor (EC 2.7.11.1) (Phytosulfokine LRR receptor kinase) - Daucus carota (Carrot) PTKc Pkinase_Tyr TyrKc S_TKc Pkinase S_TKc PTKc_Csk_like PTKc_Jak_rpt2 PTKc_EGFR_like PTKc_InsR_like PTK…	-11.6491
30.2.24	signalling.receptor kinases.S-locus glycoprotein like	i2_LQ_LWC_c6470/f2p0/2500	Transcript	moderately similar to ( 443) AT4G23180 | Symbols: CRK10, RLK4 | CRK10 (CYSTEINE-RICH RLK10); ATP binding / kinase/ protein kinase/ protein serine/threonine kinase/ protein tyrosine kinase | chr4:12138171-12140780 FORWARDweakly similar to ( 198) NORK_PEA Nodulation receptor kinase precursor (EC 2.7.11.1) - Pisum sativum (Garden pea) TyrKc Pkinase_Tyr PTKc S_TKc Pkinase S_TKc SPS1 PTKc_Jak_rpt2 PTK…	11.0778
30.2.24	signalling.receptor kinases.S-locus glycoprotein like	i2_HQ_LWC_c23524/f5p0/2346	Transcript	moderately similar to ( 333) AT4G23180 | Symbols: CRK10, RLK4 | CRK10 (CYSTEINE-RICH RLK10); ATP binding / kinase/ protein kinase/ protein serine/threonine kinase/ protein tyrosine kinase | chr4:12138171-12140780 FORWARDweakly similar to ( 144) NORK_PEA Nodulation receptor kinase precursor (EC 2.7.11.1) - Pisum sativum (Garden pea) TyrKc Pkinase_Tyr PTKc Pkinase S_TKc S_TKc PTKc_Jak_rpt2 SPS1 PTK…	6.63931
30.2.24	signalling.receptor kinases.S-locus glycoprotein like	i2_LQ_LWC_c11043/f1p0/2949	Transcript	highly similar to ( 541) AT4G21390 | Symbols: B120 | B120; ATP binding / protein kinase/ protein serine/threonine kinase/ sugar binding | chr4:11394458-11397474 REVERSEweakly similar to ( 181) SLSG3_BRAOL S-locus-specific glycoprotein S13 precursor (SLSG-13) (Fragment) - Brassica oleracea (Wild cabbage) TyrKc Pkinase_Tyr S_TKc PTKc Pkinase S_TKc PTKc_Jak_rpt2 PTKc_Csk_like SPS1 PTKc_Src_like PTKc…	-2.47968
30.2.24	signalling.receptor kinases.S-locus glycoprotein like	i2_LQ_LWC_c66436/f1p1/2100	Transcript	moderately similar to ( 439) AT3G45860 | Symbols: | receptor-like protein kinase, putative | chr3:16863401-16866041 REVERSEweakly similar to ( 199) PSKR_DAUCA Phytosulfokine receptor precursor (EC 2.7.11.1) (Phytosulfokine LRR receptor kinase) - Daucus carota (Carrot) TyrKc Pkinase_Tyr PTKc S_TKc Pkinase S_TKc PTKc_Jak_rpt2 PTKc_Src_like SPS1 PTKc_Srm_Brk PTKc_Frk_like PTKc_Lyn PTKc_EphR PTKc_Ror…	7.34251
30.2.24	signalling.receptor kinases.S-locus glycoprotein like	i1_LQ_LWC_c11310/f1p0/1836	Transcript	moderately similar to ( 295) AT4G23140 | Symbols: CRK6 | CRK6 (CYSTEINE-RICH RLK 6); kinase | chr4:12121397-12124037 FORWARDweakly similar to ( 132) NORK_MEDTR Nodulation receptor kinase precursor (EC 2.7.11.1) (Does not make infections protein 2) (Symbiosis receptor-like kinase) (MtSYMRK) - Medicago truncatula (Barrel medic) S_TKc TyrKc S_TKc Pkinase_Tyr Pkinase PTKc PTKc_Jak_rpt2 PTKc_Srm_Brk p…	0.897807
30.2.24	signalling.receptor kinases.S-locus glycoprotein like	i2_LQ_LWC_c47037/f1p3/2631	Transcript	highly similar to ( 586) AT2G19130 | Symbols: | S-locus lectin protein kinase family protein | chr2:8293789-8296275 FORWARDmoderately similar to ( 247) KPRO_MAIZE Putative receptor protein kinase ZmPK1 precursor (EC 2.7.11.1) - Zea mays (Maize) Pkinase TyrKc Pkinase_Tyr S_TKc PTKc S_TKc PTKc_Csk_like PTKc_Frk_like PTKc_Src_like PTKc_InsR_like PTKc_Trk PTKc_EphR SPS1 PTKc_Itk PTKc_Fes_like PTKc_Te…	0
30.2.24	signalling.receptor kinases.S-locus glycoprotein like	i2_LQ_LWC_c127067/f8p0/2391	Transcript	highly similar to ( 620) AT5G51560 | Symbols: | leucine-rich repeat transmembrane protein kinase, putative | chr5:20945807-20948613 FORWARDweakly similar to ( 179) PSKR_DAUCA Phytosulfokine receptor precursor (EC 2.7.11.1) (Phytosulfokine LRR receptor kinase) - Daucus carota (Carrot) TyrKc PTKc Pkinase_Tyr PTKc_Jak_rpt2 S_TKc PTK_CCK4 Pkinase S_TKc PTKc_Jak2_Jak3_rpt2 PTKc_DDR PTKc_Srm_Brk PTKc_B…	0
30.2.24	signalling.receptor kinases.S-locus glycoprotein like	i4_LQ_LWC_c16402/f1p0/4302	Transcript	moderately similar to ( 461) AT1G70520 | Symbols: | protein kinase family protein | chr1:26584888-26587334 REVERSEmoderately similar to ( 201) PSKR_DAUCA Phytosulfokine receptor precursor (EC 2.7.11.1) (Phytosulfokine LRR receptor kinase) - Daucus carota (Carrot) Pkinase_Tyr Pkinase TyrKc S_TKc PTKc S_TKc SPS1 PTKc_Src_like PTKc_Srm_Brk PTKc_EphR PTKc_Jak_rpt2 PTKc_Csk_like PTKc_Frk_like PTKc_Lck…	6.64724
30.2.24	signalling.receptor kinases.S-locus glycoprotein like	i1_HQ_LWC_c1985/f4p0/1751	Transcript	moderately similar to ( 461) AT1G16670 | Symbols: | protein kinase family protein | chr1:5697846-5699492 FORWARDmoderately similar to ( 228) NORK_PEA Nodulation receptor kinase precursor (EC 2.7.11.1) - Pisum sativum (Garden pea) TyrKc PTKc Pkinase_Tyr S_TKc Pkinase S_TKc PTKc_Src_like PTKc_Srm_Brk PTKc_Csk_like PTKc_Frk_like PTKc_EphR PTKc_Src PTKc_Lck_Blk PTKc_Fyn_Yrk PTKc_Jak_rpt2 PTKc_Trk PTK…	7.89309
30.2.24	signalling.receptor kinases.S-locus glycoprotein like	i1_LQ_LWC_c4894/f1p196/1685	Transcript	moderately similar to ( 233) AT4G11530 | Symbols: | kinase | chr4:6987093-6989599 FORWARDweakly similar to ( 169) NORK_PEA Nodulation receptor kinase precursor (EC 2.7.11.1) - Pisum sativum (Garden pea) Pkinase S_TKc S_TKc TyrKc Pkinase_Tyr PTKc PTKc_Jak_rpt2 PTKc_Csk_like PTKc_Src_like PTKc_Fes_like PTKc_InsR_like PTKc_Srm_Brk PTKc_Trk PTKc_Jak2_Jak3_rpt2 PTKc_EphR PTKc_Frk_like SPS1 PTKc_Syk_li…	-8.29776
30.2.24	signalling.receptor kinases.S-locus glycoprotein like	i2_HQ_LWC_c78402/f8p1/2229	Transcript	highly similar to ( 554) AT1G11050 | Symbols: | protein kinase family protein | chr1:3681892-3683769 FORWARDmoderately similar to ( 207) NORK_MEDTR Nodulation receptor kinase precursor (EC 2.7.11.1) (Does not make infections protein 2) (Symbiosis receptor-like kinase) (MtSYMRK) - Medicago truncatula (Barrel medic) S_TKc S_TKc TyrKc Pkinase_Tyr Pkinase PTKc PTKc_Csk_like SPS1 PTKc_Jak_rpt2 PTKc_Tr…	7.39721
30.2.24	signalling.receptor kinases.S-locus glycoprotein like	i1_HQ_LWC_c21079/f2p5/1821	Transcript	moderately similar to ( 248) AT4G23130 | Symbols: CRK5, RLK6 | CRK5 (CYSTEINE-RICH RLK5); kinase | chr4:12117688-12120134 REVERSEweakly similar to ( 163) KPRO_MAIZE Putative receptor protein kinase ZmPK1 precursor (EC 2.7.11.1) - Zea mays (Maize) S_TKc Pkinase S_TKc Pkinase_Tyr TyrKc PTKc PTKc_Jak_rpt2 SPS1 PTKc_Srm_Brk PTKc_Src_like PTKc_Ror PTKc_Csk_like PTKc_Itk PTKc_EphR PTKc_Frk_like PTKc_Fe…	0
30.2.24	signalling.receptor kinases.S-locus glycoprotein like	i2_LQ_LWC_c64341/f1p0/2810	Transcript	moderately similar to ( 487) AT2G19130 | Symbols: | S-locus lectin protein kinase family protein | chr2:8293789-8296275 FORWARDmoderately similar to ( 234) KPRO_MAIZE Putative receptor protein kinase ZmPK1 precursor (EC 2.7.11.1) - Zea mays (Maize) Pkinase S_TKc S_TKc TyrKc PTKc Pkinase_Tyr PTKc_Csk_like SPS1 PTKc_EphR PTKc_Src_like PTKc_Jak_rpt2 PTKc_Frk_like PTKc_EphR_A PTKc_Trk PTKc_EphR_A2 PT…	-4.67954
30.2.24	signalling.receptor kinases.S-locus glycoprotein like	i3_LQ_LWC_c23377/f1p0/3266	Transcript	highly similar to ( 539) AT5G60900 | Symbols: RLK1 | RLK1 (RECEPTOR-LIKE PROTEIN KINASE 1); ATP binding / carbohydrate binding / kinase/ protein kinase/ protein serine/threonine kinase/ protein tyrosine kinase/ sugar binding | chr5:24498467-24501494 REVERSEmoderately similar to ( 315) KPRO_MAIZE Putative receptor protein kinase ZmPK1 precursor (EC 2.7.11.1) - Zea mays (Maize) S_TKc Pkinase S_TKc …	-2.69124
30.2.24	signalling.receptor kinases.S-locus glycoprotein like	i4_LQ_LWC_c9916/f1p0/4714	Transcript	moderately similar to ( 364) AT1G34300 | Symbols: | lectin protein kinase family protein | chr1:12503450-12505939 FORWARDhighly similar to ( 837) KPRO_MAIZE Putative receptor protein kinase ZmPK1 precursor (EC 2.7.11.1) - Zea mays (Maize) Pkinase S_TKc S_TKc Pkinase_Tyr TyrKc PTKc SPS1 PTKc_Src_like PTKc_Csk_like PTKc_Frk_like PTKc_EGFR_like PTKc_Itk PTKc_Jak_rpt2 PTKc_EphR PTKc_Lck_Blk PTKc_Tec_…	5.61104
30.2.24	signalling.receptor kinases.S-locus glycoprotein like	i2_HQ_LWC_c63563/f3p1/2240	Transcript	highly similar to ( 798) AT4G21380 | Symbols: ARK3 | ARK3 (A. THALIANA RECEPTOR KINASE 3); kinase/ transmembrane receptor protein serine/threonine kinase | chr4:11389219-11393090 REVERSEmoderately similar to ( 361) SLSG3_BRAOL S-locus-specific glycoprotein S13 precursor (SLSG-13) (Fragment) - Brassica oleracea (Wild cabbage) TyrKc Pkinase_Tyr PTKc S_TKc S_TKc Pkinase S_locus_glycop PTKc_Srm_Brk P…	10.8077
30.2.24	signalling.receptor kinases.S-locus glycoprotein like	i1_LQ_LWC_c35020/f1p4/1829	Transcript	weakly similar to ( 172) AT3G55950 | Symbols: CCR3, ATCRR3 | CCR3 (ARABIDOPSIS THALIANA CRINKLY4 RELATED 3); kinase | chr3:20753903-20756347 REVERSEweakly similar to ( 134) NORK_MEDTR Nodulation receptor kinase precursor (EC 2.7.11.1) (Does not make infections protein 2) (Symbiosis receptor-like kinase) (MtSYMRK) - Medicago truncatula (Barrel medic) S_TKc S_TKc Pkinase TyrKc Pkinase_Tyr PTKc SPS1…	0
30.2.24	signalling.receptor kinases.S-locus glycoprotein like	i1_LQ_LWC_c17302/f1p0/1577	Transcript	moderately similar to ( 436) AT1G16670 | Symbols: | protein kinase family protein | chr1:5697846-5699492 FORWARDmoderately similar to ( 216) NORK_MEDTR Nodulation receptor kinase precursor (EC 2.7.11.1) (Does not make infections protein 2) (Symbiosis receptor-like kinase) (MtSYMRK) - Medicago truncatula (Barrel medic) Pkinase TyrKc S_TKc Pkinase_Tyr PTKc S_TKc PTKc_Srm_Brk PTKc_Src_like PTKc_Csk_…	8.24096
30.2.24	signalling.receptor kinases.S-locus glycoprotein like	i2_LQ_LWC_c8634/f1p0/2813	Transcript	highly similar to ( 592) AT2G19130 | Symbols: | S-locus lectin protein kinase family protein | chr2:8293789-8296275 FORWARDmoderately similar to ( 306) KPRO_MAIZE Putative receptor protein kinase ZmPK1 precursor (EC 2.7.11.1) - Zea mays (Maize) S_TKc Pkinase TyrKc Pkinase_Tyr PTKc S_TKc PTKc_EphR PTKc_Itk PTKc_Trk PTKc_Csk_like SPS1 PTKc_Frk_like PTKc_Tec_like PTKc_Src_like B_lectin PTKc_DDR PTKc…	2.21657
30.2.24	signalling.receptor kinases.S-locus glycoprotein like	i2_HQ_LWC_c17017/f10p1/2313	Transcript	moderately similar to ( 417) AT4G23180 | Symbols: CRK10, RLK4 | CRK10 (CYSTEINE-RICH RLK10); ATP binding / kinase/ protein kinase/ protein serine/threonine kinase/ protein tyrosine kinase | chr4:12138171-12140780 FORWARDweakly similar to ( 182) PSKR_DAUCA Phytosulfokine receptor precursor (EC 2.7.11.1) (Phytosulfokine LRR receptor kinase) - Daucus carota (Carrot) TyrKc S_TKc S_TKc PTKc Pkinase_Ty…	-1.34681
30.2.24	signalling.receptor kinases.S-locus glycoprotein like	i2_LQ_LWC_c90220/f1p1/2692	Transcript	moderately similar to ( 290) AT4G23180 | Symbols: CRK10, RLK4 | CRK10 (CYSTEINE-RICH RLK10); ATP binding / kinase/ protein kinase/ protein serine/threonine kinase/ protein tyrosine kinase | chr4:12138171-12140780 FORWARDweakly similar to ( 181) PSKR_DAUCA Phytosulfokine receptor precursor (EC 2.7.11.1) (Phytosulfokine LRR receptor kinase) - Daucus carota (Carrot) S_TKc Pkinase S_TKc Pkinase_Tyr T…	2.33563
30.2.24	signalling.receptor kinases.S-locus glycoprotein like	i2_LQ_LWC_c11939/f1p0/2471	Transcript	highly similar to ( 631) AT5G51560 | Symbols: | leucine-rich repeat transmembrane protein kinase, putative | chr5:20945807-20948613 FORWARDweakly similar to ( 147) NORK_PEA Nodulation receptor kinase precursor (EC 2.7.11.1) - Pisum sativum (Garden pea) TyrKc PTKc Pkinase_Tyr PTKc_Jak_rpt2 PTKc_Srm_Brk PTKc_Tec_like PTKc_Jak2_Jak3_rpt2 PTKc_Src_like S_TKc Pkinase PTKc_Tec_Rlk S_TKc PTKc_Itk PTKc_C…	-1.79232
30.2.24	signalling.receptor kinases.S-locus glycoprotein like	i11_LQ_LWC_c55/f1p0/11050	Transcript	highly similar to ( 993) AT1G56130 | Symbols: | leucine-rich repeat family protein / protein kinase family protein | chr1:20994931-21000887 REVERSEmoderately similar to ( 214) NORK_PEA Nodulation receptor kinase precursor (EC 2.7.11.1) - Pisum sativum (Garden pea) TyrKc S_TKc Pkinase_Tyr PTKc Pkinase S_TKc PTKc_Jak_rpt2 PTKc_Srm_Brk PTKc_Src_like PTKc_Trk PTKc_Csk_like PTKc_EphR PTKc_Frk_like SPS…	-3.42944
30.2.24	signalling.receptor kinases.S-locus glycoprotein like	i1_LQ_LWC_c4660/f1p0/1970	Transcript	highly similar to ( 768) AT1G56145 | Symbols: | leucine-rich repeat family protein / protein kinase family protein | chr1:21008225-21013934 REVERSEweakly similar to ( 145) NORK_MEDTR Nodulation receptor kinase precursor (EC 2.7.11.1) (Does not make infections protein 2) (Symbiosis receptor-like kinase) (MtSYMRK) - Medicago truncatula (Barrel medic) TyrKc PTKc Pkinase_Tyr S_TKc S_TKc Pkinase PTKc_…	-7.31105
30.2.24	signalling.receptor kinases.S-locus glycoprotein like	i2_HQ_LWC_c21290/f2p2/2649	Transcript	highly similar to ( 649) AT4G21390 | Symbols: B120 | B120; ATP binding / protein kinase/ protein serine/threonine kinase/ sugar binding | chr4:11394458-11397474 REVERSEmoderately similar to ( 251) KPRO_MAIZE Putative receptor protein kinase ZmPK1 precursor (EC 2.7.11.1) - Zea mays (Maize) TyrKc PTKc Pkinase_Tyr S_TKc Pkinase S_TKc PTKc_Jak_rpt2 PTKc_Frk_like PTKc_Src_like PTKc_Srm_Brk PTKc_Ror PT…	-8.43833
30.2.24	signalling.receptor kinases.S-locus glycoprotein like	i1_LQ_LWC_c11050/f1p0/1983	Transcript	moderately similar to ( 371) AT4G05200 | Symbols: | protein kinase family protein | chr4:2679793-2682309 REVERSEweakly similar to ( 197) PSKR_DAUCA Phytosulfokine receptor precursor (EC 2.7.11.1) (Phytosulfokine LRR receptor kinase) - Daucus carota (Carrot) TyrKc Pkinase_Tyr PTKc S_TKc S_TKc Pkinase PTKc_Jak_rpt2 PTKc_Srm_Brk PTKc_Src_like PTKc_Frk_like PTKc_Ror PTKc_EphR PTKc_Csk_like PTKc_Fes_l…	-4.81443
30.2.24	signalling.receptor kinases.S-locus glycoprotein like	i5_LQ_LWC_c7111/f1p0/5596	Transcript	moderately similar to ( 335) AT5G38280 | Symbols: PR5K | PR5K; kinase/ transmembrane receptor protein serine/threonine kinase | chr5:15293325-15295838 REVERSEmoderately similar to ( 209) KPRO_MAIZE Putative receptor protein kinase ZmPK1 precursor (EC 2.7.11.1) - Zea mays (Maize) Pkinase_Tyr TyrKc PTKc S_TKc Pkinase S_TKc PTKc_Src_like PTKc_Frk_like PTKc_Syk_like PTKc_Jak_rpt2 PTKc_Abl PTKc_Srm_Br…	8.27313
30.2.24	signalling.receptor kinases.S-locus glycoprotein like	i2_LQ_LWC_c109048/f1p0/2186	Transcript	moderately similar to ( 385) AT4G23160 | Symbols: | protein kinase family protein | chr4:12129485-12134086 FORWARDweakly similar to ( 191) RPK1_IPONI Receptor-like protein kinase precursor (EC 2.7.11.1) - Ipomoea nil (Japanese morning glory) (Pharbitis nil) Pkinase_Tyr TyrKc S_TKc Pkinase S_TKc PTKc PTKc_Jak_rpt2 SPS1 PTKc_Srm_Brk PTKc_Src_like PTKc_Frk_like PTKc_Csk_like PTKc_Ror PTKc_Trk PTKc_E…	-6.54799
30.2.24	signalling.receptor kinases.S-locus glycoprotein like	i2_LQ_LWC_c54033/f1p1/2839	Transcript	weakly similar to ( 185) AT4G21380 | Symbols: ARK3 | ARK3 (A. THALIANA RECEPTOR KINASE 3); kinase/ transmembrane receptor protein serine/threonine kinase | chr4:11389219-11393090 REVERSEweakly similar to ( 174) SLSG6_BRAOL S-locus-specific glycoprotein S6 precursor (SLSG-6) - Brassica oleracea (Wild cabbage)RT_LTR S_locus_glycop PAN_2 RVT_1 rve PAN_AP_plant protein|retrotransposon protein, putati…	5.01165
30.2.24	signalling.receptor kinases.S-locus glycoprotein like	i2_LQ_LWC_c10508/f2p0/2484	Transcript	highly similar to ( 695) AT5G51560 | Symbols: | leucine-rich repeat transmembrane protein kinase, putative | chr5:20945807-20948613 FORWARDweakly similar to ( 156) NORK_PEA Nodulation receptor kinase precursor (EC 2.7.11.1) - Pisum sativum (Garden pea) PTKc TyrKc Pkinase_Tyr PTKc_Src_like Pkinase S_TKc PTKc_Jak_rpt2 S_TKc PTKc_Jak2_Jak3_rpt2 PTKc_Tec_like PTKc_Frk_like PTKc_EphR PTKc_Srm_Brk PTKc…	-4.54765
30.2.24	signalling.receptor kinases.S-locus glycoprotein like	i2_LQ_LWC_c39894/f1p7/2474	Transcript	highly similar to ( 855) AT1G56145 | Symbols: | leucine-rich repeat family protein / protein kinase family protein | chr1:21008225-21013934 REVERSEmoderately similar to ( 209) NORK_PEA Nodulation receptor kinase precursor (EC 2.7.11.1) - Pisum sativum (Garden pea) TyrKc PTKc S_TKc Pkinase_Tyr S_TKc Pkinase PTKc_Jak_rpt2 PTKc_Srm_Brk PTKc_Src_like PTKc_Trk PTKc_Csk_like PTKc_EphR PTKc_Itk PTKc_EGF…	3.02689
30.2.24	signalling.receptor kinases.S-locus glycoprotein like	i2_HQ_LWC_c9508/f2p0/2793	Transcript	highly similar to ( 547) AT1G11330 | Symbols: | S-locus lectin protein kinase family protein | chr1:3810372-3813416 FORWARDmoderately similar to ( 212) KPRO_MAIZE Putative receptor protein kinase ZmPK1 precursor (EC 2.7.11.1) - Zea mays (Maize) TyrKc Pkinase S_TKc PTKc Pkinase_Tyr S_TKc PTKc_Jak_rpt2 SPS1 PTKc_Src_like PTKc_Srm_Brk PTKc_Ror PTKc_Csk_like PTKc_Trk PTK_CCK4 PTKc_EphR PTKc_Frk_like …	-3.07735
30.2.24	signalling.receptor kinases.S-locus glycoprotein like	i3_LQ_LWC_c14493/f1p0/3089	Transcript	highly similar to ( 947) AT1G56130 | Symbols: | leucine-rich repeat family protein / protein kinase family protein | chr1:20994931-21000887 REVERSEmoderately similar to ( 209) NORK_MEDTR Nodulation receptor kinase precursor (EC 2.7.11.1) (Does not make infections protein 2) (Symbiosis receptor-like kinase) (MtSYMRK) - Medicago truncatula (Barrel medic) TyrKc Pkinase_Tyr S_TKc S_TKc PTKc Pkinase P…	-7.08412
30.2.24	signalling.receptor kinases.S-locus glycoprotein like	i1_HQ_LWC_c16580/f3p0/1858	Transcript	moderately similar to ( 373) AT1G70740 | Symbols: | protein kinase family protein | chr1:26673847-26675687 REVERSEmoderately similar to ( 203) NORK_PEA Nodulation receptor kinase precursor (EC 2.7.11.1) - Pisum sativum (Garden pea) TyrKc Pkinase_Tyr PTKc S_TKc S_TKc Pkinase PTKc_Jak_rpt2 PTKc_Trk SPS1 PTKc_EphR PTKc_Csk_like PTKc_Ror PTKc_Fes_like PTKc_Srm_Brk PTKc_InsR_like PTKc_Frk_like PTKc_Sy…	0
30.2.24	signalling.receptor kinases.S-locus glycoprotein like	i2_HQ_LWC_c87296/f2p1/2296	Transcript	moderately similar to ( 437) AT4G05200 | Symbols: | protein kinase family protein | chr4:2679793-2682309 REVERSEmoderately similar to ( 206) PSKR_DAUCA Phytosulfokine receptor precursor (EC 2.7.11.1) (Phytosulfokine LRR receptor kinase) - Daucus carota (Carrot) TyrKc PTKc Pkinase_Tyr S_TKc S_TKc Pkinase PTKc_Jak_rpt2 PTKc_Src_like PTKc_Srm_Brk PTKc_Frk_like PTKc_EphR SPS1 PTKc_Lck_Blk PTKc_Fes_li…	11.7785
30.2.24	signalling.receptor kinases.S-locus glycoprotein like	i1_LQ_LWC_c21366/f1p0/1981	Transcript	moderately similar to ( 434) AT4G05200 | Symbols: | protein kinase family protein | chr4:2679793-2682309 REVERSEweakly similar to ( 182) NORK_MEDTR Nodulation receptor kinase precursor (EC 2.7.11.1) (Does not make infections protein 2) (Symbiosis receptor-like kinase) (MtSYMRK) - Medicago truncatula (Barrel medic) Pkinase_Tyr PTKc TyrKc S_TKc S_TKc Pkinase PTKc_Jak_rpt2 PTKc_Src_like PTKc_Ror PTK…	-10.9838
30.2.24	signalling.receptor kinases.S-locus glycoprotein like	i2_LQ_LWC_c36837/f1p3/2162	Transcript	moderately similar to ( 302) AT1G66910 | Symbols: | protein kinase, putative | chr1:24961634-24963941 REVERSEweakly similar to ( 194) KPRO_MAIZE Putative receptor protein kinase ZmPK1 precursor (EC 2.7.11.1) - Zea mays (Maize) TyrKc Pkinase_Tyr Pkinase S_TKc PTKc S_TKc PTKc_Src_like PTKc_EphR PTKc_Srm_Brk PTKc_Tec_like PTKc_Jak_rpt2 PTKc_Abl SPS1 PTKc_Itk PTKc_Csk_like PTKc_Src PTKc_Fyn_Yrk PTKc_…	0
30.2.25	signalling.receptor kinases.wall associated kinase	i1_LQ_LWC_c19801/f1p0/1831	Transcript	moderately similar to ( 421) AT1G30300 | Symbols: | unknown protein | chr1:10673084-10675061 FORWARDweakly similar to ( 180) NORK_MEDTR Nodulation receptor kinase precursor (EC 2.7.11.1) (Does not make infections protein 2) (Symbiosis receptor-like kinase) (MtSYMRK) - Medicago truncatula (Barrel medic) Pkinase_Tyr S_TKc S_TKc TyrKc PTKc Pkinase PTKc_Jak_rpt2 SPS1 PTKc_Trk PTKc_Src_like PTKc_EGFR_…	-9.84818
30.2.99	signalling.receptor kinases.misc	i2_LQ_LWC_c21054/f2p0/2265	Transcript	moderately similar to ( 210) AT1G80870 | Symbols: | protein kinase family protein | chr1:30392133-30394211 FORWARDvery weakly similar to (98.2) PSKR_DAUCA Phytosulfokine receptor precursor (EC 2.7.11.1) (Phytosulfokine LRR receptor kinase) - Daucus carota (Carrot) Pkinase S_TKc S_TKc PTKc TyrKc Pkinase_Tyr protein|protein kinase family protein, putative, expressed	5.54239
30.2.99	signalling.receptor kinases.misc	i2_LQ_LWC_c64434/f1p2/2503	Transcript	highly similar to ( 738) AT2G24370 | Symbols: | ATP binding / kinase/ protein kinase/ protein serine/threonine kinase | chr2:10369979-10373063 REVERSEweakly similar to ( 171) NORK_PEA Nodulation receptor kinase precursor (EC 2.7.11.1) - Pisum sativum (Garden pea) STK_N S_TKc TyrKc Pkinase_Tyr S_TKc PTKc Pkinase SPS1 PTKc_Src_like PTKc_Jak_rpt2 PTKc_Srm_Brk PTKc_Frk_like PTKc_Csk_like PTKc_Ror PTK…	7.638
30.2.99	signalling.receptor kinases.misc	i3_HQ_LWC_c2479/f3p0/3740	Transcript	highly similar to ( 629) AT3G47570 | Symbols: | leucine-rich repeat transmembrane protein kinase, putative | chr3:17527611-17530748 FORWARDmoderately similar to ( 321) RPK1_IPONI Receptor-like protein kinase precursor (EC 2.7.11.1) - Ipomoea nil (Japanese morning glory) (Pharbitis nil) PTKc S_TKc Pkinase_Tyr TyrKc Pkinase S_TKc PTKc_Srm_Brk PTKc_Src_like PTKc_Csk_like PTKc_Jak_rpt2 PTKc_Frk_like …	3.81147
30.2.99	signalling.receptor kinases.misc	i3_HQ_LWC_c3495/f2p12/3374	Transcript	highly similar to ( 782) AT1G72300 | Symbols: | leucine-rich repeat transmembrane protein kinase, putative | chr1:27217679-27220966 REVERSEhighly similar to ( 674) PSKR_DAUCA Phytosulfokine receptor precursor (EC 2.7.11.1) (Phytosulfokine LRR receptor kinase) - Daucus carota (Carrot) Pkinase_Tyr S_TKc Pkinase S_TKc TyrKc PTKc PTKc_Csk_like PTKc_Src_like PTKc_Trk PTKc_EphR PTKc_InsR_like PTKc_Tec_…	5.30309
30.2.99	signalling.receptor kinases.misc	i1_LQ_LWC_c10529/f1p4/1634	Transcript	moderately similar to ( 399) AT4G18640 | Symbols: MRH1 | MRH1 (morphogenesis of root hair 1); ATP binding / protein binding / protein kinase/ protein serine/threonine kinase/ protein tyrosine kinase | chr4:10260481-10263577 FORWARDweakly similar to ( 110) NORK_MEDTR Nodulation receptor kinase precursor (EC 2.7.11.1) (Does not make infections protein 2) (Symbiosis receptor-like kinase) (MtSYMRK) -…	4.46722
30.2.99	signalling.receptor kinases.misc	i2_LQ_LWC_c88609/f1p0/2209	Transcript	moderately similar to ( 364) AT4G00330 | Symbols: CRCK2 | CRCK2; ATP binding / kinase/ protein kinase/ protein serine/threonine kinase | chr4:142787-144427 REVERSEmoderately similar to ( 210) NORK_MEDTR Nodulation receptor kinase precursor (EC 2.7.11.1) (Does not make infections protein 2) (Symbiosis receptor-like kinase) (MtSYMRK) - Medicago truncatula (Barrel medic) S_TKc S_TKc Pkinase_Tyr Pkin…	4.57053
30.2.99	signalling.receptor kinases.misc	i1_LQ_LWC_c34383/f1p2/1874	Transcript	moderately similar to ( 416) AT5G15730 | Symbols: | serine/threonine protein kinase, putative | chr5:5131284-5133046 FORWARDmoderately similar to ( 205) NORK_PEA Nodulation receptor kinase precursor (EC 2.7.11.1) - Pisum sativum (Garden pea) TyrKc S_TKc S_TKc Pkinase_Tyr PTKc Pkinase PTKc_Csk_like PTKc_Srm_Brk PTKc_Jak_rpt2 PTKc_Src_like PTKc_Jak2_Jak3_rpt2 PTKc_Frk_like PTKc_Trk SPS1 PTKc_Abl PT…	4.93903
30.2.99	signalling.receptor kinases.misc	i1_LQ_LWC_c20151/f1p2/1694	Transcript	highly similar to ( 850) AT1G34300 | Symbols: | lectin protein kinase family protein | chr1:12503450-12505939 FORWARDmoderately similar to ( 252) KPRO_MAIZE Putative receptor protein kinase ZmPK1 precursor (EC 2.7.11.1) - Zea mays (Maize) Pkinase S_TKc S_TKc Pkinase_Tyr TyrKc PTKc PTKc_Src_like SPS1 PTKc_Frk_like PTKc_Csk_like PTKc_EphR PTKc_Jak_rpt2 PTKc_Srm_Brk PTKc_Ror PTKc_Fes_like PTKc_Abl P…	4.38888
30.2.99	signalling.receptor kinases.misc	i3_LQ_LWC_c26432/f1p0/3737	Transcript	highly similar to ( 897) AT5G53890 | Symbols: | leucine-rich repeat transmembrane protein kinase, putative | chr5:21877235-21880345 FORWARDhighly similar to ( 805) PSKR_DAUCA Phytosulfokine receptor precursor (EC 2.7.11.1) (Phytosulfokine LRR receptor kinase) - Daucus carota (Carrot) S_TKc S_TKc Pkinase TyrKc Pkinase_Tyr PTKc PTKc_EphR SPS1 PTKc_Src_like PTKc_Srm_Brk PTKc_Jak_rpt2 PTKc_Csk_like P…	9.80967
30.2.99	signalling.receptor kinases.misc	i2_LQ_LWC_c48105/f1p1/2361	Transcript	moderately similar to ( 275) AT5G10530 | Symbols: | lectin protein kinase, putative | chr5:3324978-3326933 REVERSEweakly similar to ( 153) NORK_MEDTR Nodulation receptor kinase precursor (EC 2.7.11.1) (Does not make infections protein 2) (Symbiosis receptor-like kinase) (MtSYMRK) - Medicago truncatula (Barrel medic) S_TKc Pkinase S_TKc Lectin_legB Pkinase_Tyr TyrKc PTKc PTKc_Jak_rpt2 SPS1 PTKc_Ep…	9.67679
30.2.99	signalling.receptor kinases.misc	i3_LQ_LWC_c30879/f1p0/3031	Transcript	highly similar to ( 836) AT1G73080 | Symbols: PEPR1 | PEPR1 (PEP1 receptor 1); ATP binding / kinase/ protein binding / protein serine/threonine kinase | chr1:27484513-27488021 FORWARDhighly similar to ( 880) RPK1_IPONI Receptor-like protein kinase precursor (EC 2.7.11.1) - Ipomoea nil (Japanese morning glory) (Pharbitis nil) S_TKc S_TKc Pkinase Pkinase_Tyr PTKc TyrKc PTKc_Jak_rpt2 SPS1 PTKc_Src_l…	6.74391
30.2.99	signalling.receptor kinases.misc	i2_LQ_LWC_c37866/f1p3/3008	Transcript	highly similar to ( 845) AT1G79620 | Symbols: | leucine-rich repeat transmembrane protein kinase, putative | chr1:29957633-29962174 REVERSEmoderately similar to ( 244) NORK_PEA Nodulation receptor kinase precursor (EC 2.7.11.1) - Pisum sativum (Garden pea) TyrKc S_TKc Pkinase_Tyr S_TKc PTKc Pkinase PTKc_Jak_rpt2 PTKc_Itk PTKc_Srm_Brk PTKc_Frk_like PTKc_Src_like PTKc_Csk_like PTKc_Ror PTKc_Tec_lik…	8.72621
30.2.99	signalling.receptor kinases.misc	i1_LQ_LWC_c11921/f1p4/1933	Transcript	moderately similar to ( 432) AT1G63430 | Symbols: | leucine-rich repeat transmembrane protein kinase, putative | chr1:23522896-23526451 FORWARDweakly similar to ( 117) PSKR_DAUCA Phytosulfokine receptor precursor (EC 2.7.11.1) (Phytosulfokine LRR receptor kinase) - Daucus carota (Carrot) protein|leucine-rich repeat family protein, putative, expressed	-2.58837
30.2.99	signalling.receptor kinases.misc	i1_LQ_LWC_c30488/f1p0/1745	Transcript	moderately similar to ( 465) AT1G18390 | Symbols: | ATP binding / kinase/ protein kinase/ protein serine/threonine kinase/ protein tyrosine kinase | chr1:6327463-6329935 FORWARDmoderately similar to ( 217) CRI4_MAIZE Putative receptor protein kinase CRINKLY4 precursor (EC 2.7.11.1) - Zea mays (Maize) S_TKc S_TKc Pkinase_Tyr Pkinase PTKc TyrKc SPS1 PTKc_Jak_rpt2 PTKc_Csk_like PTKc_Frk_like PTKc_EG…	1.62972
30.2.99	signalling.receptor kinases.misc	i2_LQ_LWC_c87359/f1p1/2275	Transcript	moderately similar to ( 384) AT1G21240 | Symbols: WAK3 | WAK3 (wall associated kinase 3); kinase/ protein serine/threonine kinase | chr1:7434303-7436702 FORWARDweakly similar to ( 182) CRI4_MAIZE Putative receptor protein kinase CRINKLY4 precursor (EC 2.7.11.1) - Zea mays (Maize) TyrKc Pkinase_Tyr PTKc S_TKc Pkinase S_TKc PTKc_Csk_like PTKc_Trk SPS1 PTKc_Itk PTKc_Jak_rpt2 PTKc_Src_like PTKc_Frk_l…	-9.16244
30.2.99	signalling.receptor kinases.misc	i3_LQ_LWC_c11269/f1p0/3513	Transcript	highly similar to ( 783) AT1G72300 | Symbols: | leucine-rich repeat transmembrane protein kinase, putative | chr1:27217679-27220966 REVERSEhighly similar to ( 687) PSKR_DAUCA Phytosulfokine receptor precursor (EC 2.7.11.1) (Phytosulfokine LRR receptor kinase) - Daucus carota (Carrot) Pkinase S_TKc S_TKc Pkinase_Tyr TyrKc PTKc PTKc_Src_like PTKc_Csk_like PTKc_Trk SPS1 PTKc_EphR PTKc_Tec_like PTKc_…	0
30.2.99	signalling.receptor kinases.misc	i2_HQ_LWC_c3649/f2p0/2272	Transcript	moderately similar to ( 317) AT2G37050 | Symbols: | kinase | chr2:15569290-15573477 FORWARDhighly similar to ( 605) NORK_MEDTR Nodulation receptor kinase precursor (EC 2.7.11.1) (Does not make infections protein 2) (Symbiosis receptor-like kinase) (MtSYMRK) - Medicago truncatula (Barrel medic) TyrKc Pkinase_Tyr PTKc S_TKc Pkinase S_TKc PTKc_Csk_like PTKc_Jak_rpt2 PTKc_Src_like PTKc_Trk PTKc_Fes_l…	8.22122
30.2.99	signalling.receptor kinases.misc	i1_LQ_LWC_c18799/f1p0/1955	Transcript	highly similar to ( 545) AT2G26330 | Symbols: ER, QRP1 | ER (ERECTA); transmembrane receptor protein kinase | chr2:11208367-11213895 REVERSEmoderately similar to ( 224) RPK1_IPONI Receptor-like protein kinase precursor (EC 2.7.11.1) - Ipomoea nil (Japanese morning glory) (Pharbitis nil) Pkinase S_TKc S_TKc Pkinase_Tyr TyrKc PTKc PTKc_Jak_rpt2 PTKc_EphR PTKc_Itk PTKc_Jak2_Jak3_rpt2 PTKc_Trk SPS1 P…	-9.93822
30.2.99	signalling.receptor kinases.misc	i2_HQ_LWC_c81616/f2p0/2980	Transcript	moderately similar to ( 490) AT1G21270 | Symbols: WAK2 | WAK2; ATP binding / calcium ion binding / protein kinase/ protein serine/threonine kinase | chr1:7444997-7447345 FORWARDmoderately similar to ( 208) NORK_MEDTR Nodulation receptor kinase precursor (EC 2.7.11.1) (Does not make infections protein 2) (Symbiosis receptor-like kinase) (MtSYMRK) - Medicago truncatula (Barrel medic) TyrKc S_TKc Pk…	7.01463
30.2.99	signalling.receptor kinases.misc	i2_LQ_LWC_c11590/f1p0/2485	Transcript	moderately similar to ( 234) AT2G46850 | Symbols: | ATP binding / protein kinase/ protein tyrosine kinase | chr2:19251083-19253313 FORWARDvery weakly similar to (88.6) NORK_MEDTR Nodulation receptor kinase precursor (EC 2.7.11.1) (Does not make infections protein 2) (Symbiosis receptor-like kinase) (MtSYMRK) - Medicago truncatula (Barrel medic) Pkinase_Tyr TyrKc S_TKc protein|ATP binding protein,…	5.0501
30.2.99	signalling.receptor kinases.misc	i2_LQ_LWC_c66007/f1p1/2594	Transcript	moderately similar to ( 370) AT1G34300 | Symbols: | lectin protein kinase family protein | chr1:12503450-12505939 FORWARDhighly similar to ( 695) KPRO_MAIZE Putative receptor protein kinase ZmPK1 precursor (EC 2.7.11.1) - Zea mays (Maize) Pkinase S_TKc Pkinase_Tyr TyrKc S_TKc PTKc SPS1 PTKc_EphR PTKc_EGFR_like PTKc_Csk_like PTKc_Trk PTKc_Src_like PTKc_Frk_like PTKc_EphR_A2 PTKc_Jak_rpt2 PTKc_Syk_…	7.86136
30.2.99	signalling.receptor kinases.misc	i2_LQ_LWC_c53697/f1p2/2351	Transcript	highly similar to ( 728) AT2G24370 | Symbols: | ATP binding / kinase/ protein kinase/ protein serine/threonine kinase | chr2:10369979-10373063 REVERSEweakly similar to ( 173) PSKR_DAUCA Phytosulfokine receptor precursor (EC 2.7.11.1) (Phytosulfokine LRR receptor kinase) - Daucus carota (Carrot) STK_N S_TKc S_TKc Pkinase_Tyr PTKc TyrKc Pkinase SPS1 PTKc_Src_like PTKc_Jak_rpt2 PTKc_Ror PTKc_Srm_Brk…	6.16808
30.2.99	signalling.receptor kinases.misc	i2_LQ_LWC_c72239/f1p0/2300	Transcript	weakly similar to ( 193) AT3G60720 | Symbols: PDLP8 | PDLP8 (PLASMODESMATA-LOCATED PROTEIN 8) | chr3:22442035-22443608 FORWARD protein|cysteine-rich repeat secretory protein precursor, putative, expressed	8.67538
30.2.99	signalling.receptor kinases.misc	i2_HQ_LWC_c35464/f2p2/2303	Transcript	moderately similar to ( 392) AT5G10530 | Symbols: | lectin protein kinase, putative | chr5:3324978-3326933 REVERSEweakly similar to ( 178) NORK_PEA Nodulation receptor kinase precursor (EC 2.7.11.1) - Pisum sativum (Garden pea) Pkinase S_TKc S_TKc TyrKc Pkinase_Tyr PTKc SPS1 PTKc_Srm_Brk PTKc_Trk PTKc_Jak_rpt2 PTKc_EphR PTKc_Syk_like PTKc_Src_like PTKc_Csk_like PTKc_Abl PTKc_Ror PTKc_Frk_like PTK…	-7.92107
30.2.99	signalling.receptor kinases.misc	i1_LQ_LWC_c34715/f1p2/1456	Transcript	moderately similar to ( 236) AT1G33260 | Symbols: | protein kinase family protein | chr1:12064796-12066114 FORWARDweakly similar to ( 137) NORK_MEDTR Nodulation receptor kinase precursor (EC 2.7.11.1) (Does not make infections protein 2) (Symbiosis receptor-like kinase) (MtSYMRK) - Medicago truncatula (Barrel medic) Pkinase S_TKc S_TKc TyrKc Pkinase_Tyr PTKc SPS1 PTKc_Ror PTKc_Src_like PTKc_Csk_l…	-1.11457
30.2.99	signalling.receptor kinases.misc	i2_HQ_LWC_c11755/f2p0/2670	Transcript	highly similar to ( 506) AT5G45840 | Symbols: | leucine-rich repeat transmembrane protein kinase, putative | chr5:18594080-18597221 REVERSEvery weakly similar to (98.2) CRI4_MAIZE Putative receptor protein kinase CRINKLY4 precursor (EC 2.7.11.1) - Zea mays (Maize) Pkinase_Tyr PTKc S_TKc S_TKc Pkinase TyrKc protein|expressed protein	-5.15533
30.2.99	signalling.receptor kinases.misc	i3_HQ_LWC_c31815/f3p0/3125	Transcript	highly similar to ( 664) AT4G29990 | Symbols: | light repressible receptor protein kinase | chr4:14665802-14669438 REVERSEmoderately similar to ( 332) NORK_MEDTR Nodulation receptor kinase precursor (EC 2.7.11.1) (Does not make infections protein 2) (Symbiosis receptor-like kinase) (MtSYMRK) - Medicago truncatula (Barrel medic) Pkinase_Tyr S_TKc Pkinase TyrKc PTKc S_TKc SPS1 PTKc_Frk_like PTKc_Cs…	-1.29473
30.2.99	signalling.receptor kinases.misc	i2_LQ_LWC_c104446/f1p6/2372	Transcript	weakly similar to ( 164) AT4G23200 | Symbols: | protein kinase family protein | chr4:12145380-12147934 REVERSEweakly similar to ( 143) PSKR_DAUCA Phytosulfokine receptor precursor (EC 2.7.11.1) (Phytosulfokine LRR receptor kinase) - Daucus carota (Carrot) Pkinase S_TKc S_TKc Pkinase_Tyr TyrKc PTKc PTKc_Jak_rpt2 SPS1 PTKc_EphR PTKc_Srm_Brk PTKc_Csk_like PTKc_Src_like PTKc_Tec_like PTKc_Itk PTKc_Ep…	-3.99939
30.2.99	signalling.receptor kinases.misc	i2_HQ_LWC_c115586/f5p0/2937	Transcript	moderately similar to ( 285) AT5G47850 | Symbols: CCR4 | CCR4 (ARABIDOPSIS THALIANA CRINKLY4 RELATED 4); kinase | chr5:19378803-19381058 REVERSEmoderately similar to ( 229) CRI4_MAIZE Putative receptor protein kinase CRINKLY4 precursor (EC 2.7.11.1) - Zea mays (Maize) Pkinase S_TKc S_TKc PTKc TyrKc Pkinase_Tyr SPS1 PTKc_Jak_rpt2 PTKc_Csk_like PTKc_Fes_like PTKc_Csk PTKc_Itk PTKc_Trk PTKc_Tec_like…	8.4863
30.2.99	signalling.receptor kinases.misc	i2_HQ_LWC_c4809/f2p0/2296	Transcript	moderately similar to ( 429) AT3G45410 | Symbols: | lectin protein kinase family protein | chr3:16654019-16656013 REVERSEmoderately similar to ( 211) PSKR_DAUCA Phytosulfokine receptor precursor (EC 2.7.11.1) (Phytosulfokine LRR receptor kinase) - Daucus carota (Carrot) Lectin_legB Pkinase S_TKc TyrKc S_TKc PTKc Pkinase_Tyr PTKc_Csk_like SPS1 PTKc_Jak_rpt2 PTKc_EphR PTKc_Src_like PTKc_Srm_Brk PTK…	-9.12003
30.2.99	signalling.receptor kinases.misc	i2_LQ_LWC_c38797/f1p1/2547	Transcript	moderately similar to ( 448) AT1G21270 | Symbols: WAK2 | WAK2; ATP binding / calcium ion binding / protein kinase/ protein serine/threonine kinase | chr1:7444997-7447345 FORWARDweakly similar to ( 180) NORK_MEDTR Nodulation receptor kinase precursor (EC 2.7.11.1) (Does not make infections protein 2) (Symbiosis receptor-like kinase) (MtSYMRK) - Medicago truncatula (Barrel medic) TyrKc Pkinase_Tyr …	0
30.2.99	signalling.receptor kinases.misc	i2_LQ_LWC_c18958/f1p1/2278	Transcript	moderately similar to ( 439) AT1G25570 | Symbols: | leucine-rich repeat protein-related | chr1:8992183-8995430 REVERSE protein|leucine-rich repeat protein-related, putative, expressed	0
30.2.99	signalling.receptor kinases.misc	i2_LQ_LWC_c103886/f1p3/2189	Transcript	nearly identical (1126) AT1G79620 | Symbols: | leucine-rich repeat transmembrane protein kinase, putative | chr1:29957633-29962174 REVERSEmoderately similar to ( 213) NORK_MEDTR Nodulation receptor kinase precursor (EC 2.7.11.1) (Does not make infections protein 2) (Symbiosis receptor-like kinase) (MtSYMRK) - Medicago truncatula (Barrel medic) TyrKc PTKc Pkinase_Tyr S_TKc S_TKc Pkinase PTKc_Src_l…	-4.70358
30.2.99	signalling.receptor kinases.misc	i2_LQ_LWC_c11721/f1p0/2239	Transcript	highly similar to ( 653) AT3G53810 | Symbols: | lectin protein kinase, putative | chr3:19933153-19935186 REVERSEmoderately similar to ( 202) PSKR_DAUCA Phytosulfokine receptor precursor (EC 2.7.11.1) (Phytosulfokine LRR receptor kinase) - Daucus carota (Carrot) Lectin_legB Pkinase S_TKc TyrKc Pkinase_Tyr PTKc S_TKc PTKc_Jak_rpt2 PTKc_EphR SPS1 PTKc_Csk_like PTKc_EGFR_like PTKc_Srm_Brk PTKc_Abl PT…	0
30.2.99	signalling.receptor kinases.misc	i2_LQ_LWC_c20868/f1p0/2187	Transcript	moderately similar to ( 296) AT4G00330 | Symbols: CRCK2 | CRCK2; ATP binding / kinase/ protein kinase/ protein serine/threonine kinase | chr4:142787-144427 REVERSEweakly similar to ( 182) NORK_MEDTR Nodulation receptor kinase precursor (EC 2.7.11.1) (Does not make infections protein 2) (Symbiosis receptor-like kinase) (MtSYMRK) - Medicago truncatula (Barrel medic) Pkinase_Tyr PTKc TyrKc Pkinase S…	4.24991
30.2.99	signalling.receptor kinases.misc	i3_LQ_LWC_c7252/f1p4/3919	Transcript	moderately similar to ( 338) AT2G45910 | Symbols: | protein kinase family protein / U-box domain-containing protein | chr2:18894520-18898212 FORWARDweakly similar to ( 120) NORK_MEDTR Nodulation receptor kinase precursor (EC 2.7.11.1) (Does not make infections protein 2) (Symbiosis receptor-like kinase) (MtSYMRK) - Medicago truncatula (Barrel medic) STK_N S_TKc Pkinase S_TKc Pkinase_Tyr TyrKc PTK…	11.6962
30.2.99	signalling.receptor kinases.misc	i1_LQ_LWC_c11521/f1p0/1539	Transcript	moderately similar to ( 204) AT1G33260 | Symbols: | protein kinase family protein | chr1:12064796-12066114 FORWARDweakly similar to ( 111) NORK_MEDTR Nodulation receptor kinase precursor (EC 2.7.11.1) (Does not make infections protein 2) (Symbiosis receptor-like kinase) (MtSYMRK) - Medicago truncatula (Barrel medic) S_TKc S_TKc Pkinase SPS1 Pkinase_Tyr TyrKc PTKc PTKc_Jak_rpt2 protein|serine/thre…	-1.50465
30.2.99	signalling.receptor kinases.misc	i2_HQ_LWC_c16621/f6p1/2645	Transcript	moderately similar to ( 338) AT1G34300 | Symbols: | lectin protein kinase family protein | chr1:12503450-12505939 FORWARDhighly similar to ( 603) KPRO_MAIZE Putative receptor protein kinase ZmPK1 precursor (EC 2.7.11.1) - Zea mays (Maize) Pkinase S_TKc S_TKc TyrKc Pkinase_Tyr PTKc SPS1 PTKc_InsR_like PTKc_Src_like PTKc_EGFR_like PTKc_Csk_like PTKc_Frk_like B_lectin PTKc_Fes_like PTKc_EphR_A2 PTKc…	0
30.2.99	signalling.receptor kinases.misc	i2_LQ_LWC_c3242/f1p0/2547	Transcript	moderately similar to ( 380) AT1G21270 | Symbols: WAK2 | WAK2; ATP binding / calcium ion binding / protein kinase/ protein serine/threonine kinase | chr1:7444997-7447345 FORWARDweakly similar to ( 185) NORK_MEDTR Nodulation receptor kinase precursor (EC 2.7.11.1) (Does not make infections protein 2) (Symbiosis receptor-like kinase) (MtSYMRK) - Medicago truncatula (Barrel medic) TyrKc S_TKc Pkinas…	1.18876
30.2.99	signalling.receptor kinases.misc	i2_LQ_LWC_c33964/f1p1/2961	Transcript	highly similar to ( 848) AT1G60800 | Symbols: NIK3 | NIK3 (NSP-INTERACTING KINASE 3); kinase | chr1:22383601-22386931 REVERSEmoderately similar to ( 270) PSKR_DAUCA Phytosulfokine receptor precursor (EC 2.7.11.1) (Phytosulfokine LRR receptor kinase) - Daucus carota (Carrot) TyrKc PTKc Pkinase_Tyr S_TKc S_TKc Pkinase PTKc_Csk_like PTKc_Jak_rpt2 PTKc_Srm_Brk PTKc_EphR PTKc_Fes_like PTKc_InsR_like S…	8.59047
30.2.99	signalling.receptor kinases.misc	i4_LQ_LWC_c9916/f1p0/4714	Transcript	moderately similar to ( 364) AT1G34300 | Symbols: | lectin protein kinase family protein | chr1:12503450-12505939 FORWARDhighly similar to ( 837) KPRO_MAIZE Putative receptor protein kinase ZmPK1 precursor (EC 2.7.11.1) - Zea mays (Maize) Pkinase S_TKc S_TKc Pkinase_Tyr TyrKc PTKc SPS1 PTKc_Src_like PTKc_Csk_like PTKc_Frk_like PTKc_EGFR_like PTKc_Itk PTKc_Jak_rpt2 PTKc_EphR PTKc_Lck_Blk PTKc_Tec_…	5.61104
30.2.99	signalling.receptor kinases.misc	i1_HQ_LWC_c2243/f3p0/1659	Transcript	moderately similar to ( 387) AT4G00330 | Symbols: CRCK2 | CRCK2; ATP binding / kinase/ protein kinase/ protein serine/threonine kinase | chr4:142787-144427 REVERSEmoderately similar to ( 211) NORK_MEDTR Nodulation receptor kinase precursor (EC 2.7.11.1) (Does not make infections protein 2) (Symbiosis receptor-like kinase) (MtSYMRK) - Medicago truncatula (Barrel medic) S_TKc S_TKc Pkinase_Tyr TyrK…	11.7647
30.2.99	signalling.receptor kinases.misc	i2_LQ_LWC_c39851/f2p2/2936	Transcript	moderately similar to ( 473) AT3G46400 | Symbols: | leucine-rich repeat protein kinase, putative | chr3:17073196-17077328 FORWARDmoderately similar to ( 323) NORK_MEDTR Nodulation receptor kinase precursor (EC 2.7.11.1) (Does not make infections protein 2) (Symbiosis receptor-like kinase) (MtSYMRK) - Medicago truncatula (Barrel medic) Pkinase_Tyr TyrKc PTKc S_TKc S_TKc Pkinase PTKc_Fes_like PTKc_…	10.5186
30.2.99	signalling.receptor kinases.misc	i2_HQ_LWC_c127271/f13p4/2225	Transcript	highly similar to ( 526) AT5G10290 | Symbols: | leucine-rich repeat family protein / protein kinase family protein | chr5:3235462-3238171 REVERSEmoderately similar to ( 209) PSKR_DAUCA Phytosulfokine receptor precursor (EC 2.7.11.1) (Phytosulfokine LRR receptor kinase) - Daucus carota (Carrot) Pkinase_Tyr TyrKc PTKc Pkinase S_TKc S_TKc PTKc_Met_Ron PTKc_InsR_like PTKc_Fes_like PTKc_Jak_rpt2 PTKc_…	3.37422
30.2.99	signalling.receptor kinases.misc	i2_HQ_LWC_c38968/f2p1/2289	Transcript	weakly similar to ( 188) AT2G33580 | Symbols: | protein kinase family protein / peptidoglycan-binding LysM domain-containing protein | chr2:14219848-14221842 REVERSEweakly similar to ( 120) KPRO_MAIZE Putative receptor protein kinase ZmPK1 precursor (EC 2.7.11.1) - Zea mays (Maize) S_TKc Pkinase_Tyr S_TKc Pkinase PTKc TyrKc SPS1 PTKc_Csk_like PTKc_Src_like PTKc_Srm_Brk PTKc_Chk PTKc_Frk_like PTKc…	0
30.2.99	signalling.receptor kinases.misc	i3_LQ_LWC_c6115/f1p2/3586	Transcript	nearly identical (1251) AT2G01950 | Symbols: VH1, BRL2 | BRL2 (BRI1-LIKE 2); ATP binding / protein serine/threonine kinase/ transmembrane receptor protein serine/threonine kinase | chr2:440805-444236 REVERSEmoderately similar to ( 474) PSKR_DAUCA Phytosulfokine receptor precursor (EC 2.7.11.1) (Phytosulfokine LRR receptor kinase) - Daucus carota (Carrot) PTKc Pkinase_Tyr S_TKc TyrKc S_TKc Pkinase…	-3.32108
30.2.99	signalling.receptor kinases.misc	i3_HQ_LWC_c13008/f3p2/3462	Transcript	highly similar to ( 537) AT3G47570 | Symbols: | leucine-rich repeat transmembrane protein kinase, putative | chr3:17527611-17530748 FORWARDmoderately similar to ( 343) RPK1_IPONI Receptor-like protein kinase precursor (EC 2.7.11.1) - Ipomoea nil (Japanese morning glory) (Pharbitis nil) Pkinase S_TKc S_TKc TyrKc Pkinase_Tyr PTKc PTKc_Jak_rpt2 PTKc_Csk_like PTKc_Srm_Brk protein|receptor-like protei…	-5.65127
30.2.99	signalling.receptor kinases.misc	i1_LQ_LWC_c23590/f1p3/1918	Transcript	moderately similar to ( 404) AT1G21270 | Symbols: WAK2 | WAK2; ATP binding / calcium ion binding / protein kinase/ protein serine/threonine kinase | chr1:7444997-7447345 FORWARDweakly similar to ( 191) NORK_MEDTR Nodulation receptor kinase precursor (EC 2.7.11.1) (Does not make infections protein 2) (Symbiosis receptor-like kinase) (MtSYMRK) - Medicago truncatula (Barrel medic) TyrKc S_TKc Pkinas…	-7.93015
30.2.99	signalling.receptor kinases.misc	i3_HQ_LWC_c2036/f4p7/3416	Transcript	highly similar to ( 676) AT3G47570 | Symbols: | leucine-rich repeat transmembrane protein kinase, putative | chr3:17527611-17530748 FORWARDmoderately similar to ( 405) RPK1_IPONI Receptor-like protein kinase precursor (EC 2.7.11.1) - Ipomoea nil (Japanese morning glory) (Pharbitis nil) Pkinase S_TKc S_TKc Pkinase_Tyr TyrKc PTKc PTKc_Jak_rpt2 PTKc_Src_like PTKc_Srm_Brk PTKc_Csk_like SPS1 PTKc_Frk_…	-2.91081
30.2.99	signalling.receptor kinases.misc	i3_HQ_LWC_c10402/f3p0/3904	Transcript	highly similar to ( 520) AT3G47570 | Symbols: | leucine-rich repeat transmembrane protein kinase, putative | chr3:17527611-17530748 FORWARDmoderately similar to ( 372) RPK1_IPONI Receptor-like protein kinase precursor (EC 2.7.11.1) - Ipomoea nil (Japanese morning glory) (Pharbitis nil) Pkinase S_TKc S_TKc Pkinase_Tyr TyrKc PTKc PTKc_Csk_like PTKc_Jak_rpt2 PTKc_Srm_Brk PTKc_Src_like PTKc_Axl_like …	5.45512
30.2.99	signalling.receptor kinases.misc	i2_LQ_LWC_c103368/f1p3/3662	Transcript	moderately similar to ( 298) AT1G06840 | Symbols: | leucine-rich repeat transmembrane protein kinase, putative | chr1:2097854-2103479 REVERSEweakly similar to ( 140) NORK_MEDTR Nodulation receptor kinase precursor (EC 2.7.11.1) (Does not make infections protein 2) (Symbiosis receptor-like kinase) (MtSYMRK) - Medicago truncatula (Barrel medic) PTKc S_TKc Pkinase_Tyr TyrKc S_TKc Pkinase PTKc_Met_Ro…	-11.0167
30.2.99	signalling.receptor kinases.misc	i2_HQ_LWC_c20471/f3p1/2460	Transcript	moderately similar to ( 462) AT5G10530 | Symbols: | lectin protein kinase, putative | chr5:3324978-3326933 REVERSEmoderately similar to ( 344) POLX_TOBAC Retrovirus-related Pol polyprotein from transposon TNT 1-94 [Includes: Protease (EC 3.4.23.-); Reverse transcriptase (EC 2.7.7.49); Endonuclease] - Nicotiana tabacum (Common tobacco) RVT_2 Lectin_legB Pkinase S_TKc S_TKc Pkinase_Tyr PTKc TyrKc P…	1.80987
30.2.99	signalling.receptor kinases.misc	i2_LQ_LWC_c23676/f1p1/2825	Transcript	highly similar to ( 756) AT5G45780 | Symbols: | leucine-rich repeat transmembrane protein kinase, putative | chr5:18566946-18569625 REVERSEmoderately similar to ( 280) PSKR_DAUCA Phytosulfokine receptor precursor (EC 2.7.11.1) (Phytosulfokine LRR receptor kinase) - Daucus carota (Carrot) TyrKc Pkinase_Tyr PTKc S_TKc Pkinase S_TKc PTKc_Csk_like PTKc_Srm_Brk PTKc_Src_like PTKc_Fes_like PTKc_Jak_rpt…	0
30.2.99	signalling.receptor kinases.misc	i1_LQ_LWC_c19801/f1p0/1831	Transcript	moderately similar to ( 421) AT1G30300 | Symbols: | unknown protein | chr1:10673084-10675061 FORWARDweakly similar to ( 180) NORK_MEDTR Nodulation receptor kinase precursor (EC 2.7.11.1) (Does not make infections protein 2) (Symbiosis receptor-like kinase) (MtSYMRK) - Medicago truncatula (Barrel medic) Pkinase_Tyr S_TKc S_TKc TyrKc PTKc Pkinase PTKc_Jak_rpt2 SPS1 PTKc_Trk PTKc_Src_like PTKc_EGFR_…	-9.84818
30.2.99	signalling.receptor kinases.misc	i2_LQ_LWC_c32293/f1p3/2618	Transcript	highly similar to ( 502) AT1G21230 | Symbols: WAK5 | WAK5 (WALL ASSOCIATED KINASE 5); kinase/ protein serine/threonine kinase | chr1:7429980-7432346 FORWARDweakly similar to ( 181) NORK_MEDTR Nodulation receptor kinase precursor (EC 2.7.11.1) (Does not make infections protein 2) (Symbiosis receptor-like kinase) (MtSYMRK) - Medicago truncatula (Barrel medic) TyrKc S_TKc Pkinase_Tyr PTKc S_TKc Pkin…	-4.30967
30.2.99	signalling.receptor kinases.misc	i2_LQ_LWC_c4413/f1p0/2122	Transcript	weakly similar to ( 155) AT1G28390 | Symbols: | protein kinase family protein | chr1:9966814-9968226 REVERSEweakly similar to ( 120) CRI4_MAIZE Putative receptor protein kinase CRINKLY4 precursor (EC 2.7.11.1) - Zea mays (Maize) TyrKc PTKc Pkinase_Tyr S_TKc S_TKc Pkinase SPS1 PTKc_Jak_rpt2 PTKc_Jak2_Jak3_rpt2 protein|TKL_IRAK_CR4L.2 - The CR4L subfamily has homology with Crinkly4, expressed	3.08784
30.2.99	signalling.receptor kinases.misc	i2_LQ_LWC_c108445/f1p1/2508	Transcript	moderately similar to ( 346) AT5G38260 | Symbols: | serine/threonine protein kinase, putative | chr5:15283692-15285837 REVERSEweakly similar to ( 181) KPRO_MAIZE Putative receptor protein kinase ZmPK1 precursor (EC 2.7.11.1) - Zea mays (Maize) PTKc TyrKc Pkinase_Tyr Pkinase S_TKc S_TKc PTKc_Srm_Brk SPS1 PTKc_Jak_rpt2 PTKc_EGFR_like PTKc_Itk PTKc_Trk PTKc_Csk_like PTKc_FGFR PTKc_Ror PTKc_Tec_like …	0
30.2.99	signalling.receptor kinases.misc	i2_LQ_LWC_c24403/f1p0/2667	Transcript	highly similar to ( 779) AT1G28340 | Symbols: AtRLP4 | AtRLP4 (Receptor Like Protein 4); protein binding | chr1:9940175-9943252 FORWARDvery weakly similar to (94.0) NORK_PEA Nodulation receptor kinase precursor (EC 2.7.11.1) - Pisum sativum (Garden pea) protein|leucine-rich repeat family protein, putative, expressed	6.3053
30.2.99	signalling.receptor kinases.misc	i2_LQ_LWC_c53915/f2p0/2748	Transcript	moderately similar to ( 332) AT3G19300 | Symbols: | protein kinase family protein | chr3:6690242-6693210 REVERSEweakly similar to ( 166) CRI4_MAIZE Putative receptor protein kinase CRINKLY4 precursor (EC 2.7.11.1) - Zea mays (Maize) TyrKc Pkinase S_TKc PTKc Pkinase_Tyr S_TKc PTKc_Srm_Brk SPS1 PTKc_Csk_like PTKc_Src_like PTKc_EphR PTKc_Fes_like PTKc_Abl PTKc_Itk PTKc_Frk_like PTKc_Trk PTKc_Chk pro…	9.34574
30.2.99	signalling.receptor kinases.misc	i2_HQ_LWC_c52871/f2p0/2228	Transcript	moderately similar to ( 371) AT5G13290 | Symbols: SOL2, CRN | CRN (CORYNE); ATP binding / kinase/ protein kinase | chr5:4253126-4254215 REVERSEweakly similar to ( 139) PSKR_DAUCA Phytosulfokine receptor precursor (EC 2.7.11.1) (Phytosulfokine LRR receptor kinase) - Daucus carota (Carrot) S_TKc S_TKc Pkinase TyrKc PTKc Pkinase_Tyr PTKc_Jak_rpt2 SPS1 protein|receptor-like protein kinase 2 precursor…	7.39
30.2.99	signalling.receptor kinases.misc	i3_LQ_LWC_c43067/f1p0/3696	Transcript	highly similar to ( 923) AT2G02220 | Symbols: ATPSKR1, PSKR1 | PSKR1 (PHYTOSULFOKIN RECEPTOR 1); ATP binding / peptide receptor/ protein serine/threonine kinase | chr2:584098-587124 REVERSEhighly similar to ( 904) PSKR_DAUCA Phytosulfokine receptor precursor (EC 2.7.11.1) (Phytosulfokine LRR receptor kinase) - Daucus carota (Carrot) Pkinase Pkinase_Tyr TyrKc S_TKc S_TKc PTKc PTKc_EphR SPS1 PTKc_S…	6.14311
30.2.99	signalling.receptor kinases.misc	i4_LQ_LWC_c25586/f1p8/4847	Transcript	highly similar to ( 658) AT3G47570 | Symbols: | leucine-rich repeat transmembrane protein kinase, putative | chr3:17527611-17530748 FORWARDmoderately similar to ( 328) RPK1_IPONI Receptor-like protein kinase precursor (EC 2.7.11.1) - Ipomoea nil (Japanese morning glory) (Pharbitis nil) TyrKc Pkinase S_TKc Pkinase_Tyr S_TKc PTKc PTKc_Jak_rpt2 PTKc_Src_like PTKc_EphR PTKc_Srm_Brk PTKc_Frk_like PTKc…	6.61982
30.2.99	signalling.receptor kinases.misc	i2_LQ_LWC_c87366/f1p1/2331	Transcript	highly similar to ( 794) AT1G06840 | Symbols: | leucine-rich repeat transmembrane protein kinase, putative | chr1:2097854-2103479 REVERSEmoderately similar to ( 214) NORK_MEDTR Nodulation receptor kinase precursor (EC 2.7.11.1) (Does not make infections protein 2) (Symbiosis receptor-like kinase) (MtSYMRK) - Medicago truncatula (Barrel medic) TyrKc PTKc Pkinase_Tyr S_TKc S_TKc Pkinase PTKc_Jak_rp…	0
30.2.99	signalling.receptor kinases.misc	i2_HQ_LWC_c55615/f2p1/2492	Transcript	moderately similar to ( 445) AT1G18390 | Symbols: | ATP binding / kinase/ protein kinase/ protein serine/threonine kinase/ protein tyrosine kinase | chr1:6327463-6329935 FORWARDweakly similar to ( 193) NORK_MEDTR Nodulation receptor kinase precursor (EC 2.7.11.1) (Does not make infections protein 2) (Symbiosis receptor-like kinase) (MtSYMRK) - Medicago truncatula (Barrel medic) S_TKc Pkinase_Tyr …	7.42999
30.2.99	signalling.receptor kinases.misc	i2_LQ_LWC_c75863/f1p0/2042	Transcript	highly similar to ( 614) AT3G53810 | Symbols: | lectin protein kinase, putative | chr3:19933153-19935186 REVERSEmoderately similar to ( 224) PSKR_DAUCA Phytosulfokine receptor precursor (EC 2.7.11.1) (Phytosulfokine LRR receptor kinase) - Daucus carota (Carrot) Lectin_legB Pkinase S_TKc S_TKc Pkinase_Tyr TyrKc PTKc PTKc_Csk_like PTKc_EphR PTKc_Jak_rpt2 SPS1 PTKc_EGFR_like PTKc_Frk_like PTKc_EphR_…	0
30.2.99	signalling.receptor kinases.misc	i2_LQ_LWC_c36090/f1p0/2598	Transcript	moderately similar to ( 261) AT5G60900 | Symbols: RLK1 | RLK1 (RECEPTOR-LIKE PROTEIN KINASE 1); ATP binding / carbohydrate binding / kinase/ protein kinase/ protein serine/threonine kinase/ protein tyrosine kinase/ sugar binding | chr5:24498467-24501494 REVERSEweakly similar to ( 162) KPRO_MAIZE Putative receptor protein kinase ZmPK1 precursor (EC 2.7.11.1) - Zea mays (Maize) Pkinase_Tyr Pkinase …	-4.34073
30.2.99	signalling.receptor kinases.misc	i2_LQ_LWC_c109167/f1p0/2922	Transcript	moderately similar to ( 328) AT1G79670 | Symbols: RFO1, WAKL22 | RFO1 (RESISTANCE TO FUSARIUM OXYSPORUM 1); kinase | chr1:29976887-29979337 REVERSEweakly similar to ( 184) NORK_MEDTR Nodulation receptor kinase precursor (EC 2.7.11.1) (Does not make infections protein 2) (Symbiosis receptor-like kinase) (MtSYMRK) - Medicago truncatula (Barrel medic) TyrKc Pkinase_Tyr S_TKc Pkinase PTKc S_TKc PTKc_…	-6.17805
30.2.99	signalling.receptor kinases.misc	i2_LQ_LWC_c10508/f2p0/2484	Transcript	highly similar to ( 695) AT5G51560 | Symbols: | leucine-rich repeat transmembrane protein kinase, putative | chr5:20945807-20948613 FORWARDweakly similar to ( 156) NORK_PEA Nodulation receptor kinase precursor (EC 2.7.11.1) - Pisum sativum (Garden pea) PTKc TyrKc Pkinase_Tyr PTKc_Src_like Pkinase S_TKc PTKc_Jak_rpt2 S_TKc PTKc_Jak2_Jak3_rpt2 PTKc_Tec_like PTKc_Frk_like PTKc_EphR PTKc_Srm_Brk PTKc…	-4.54765
30.2.99	signalling.receptor kinases.misc	i2_LQ_LWC_c33397/f1p1/2420	Transcript	highly similar to ( 648) AT3G53810 | Symbols: | lectin protein kinase, putative | chr3:19933153-19935186 REVERSEmoderately similar to ( 212) PSKR_DAUCA Phytosulfokine receptor precursor (EC 2.7.11.1) (Phytosulfokine LRR receptor kinase) - Daucus carota (Carrot) Lectin_legB TyrKc S_TKc Pkinase_Tyr Pkinase S_TKc PTKc PTKc_EphR PTKc_Jak_rpt2 PTKc_Csk_like SPS1 PTKc_Frk_like PTKc_Src_like PTKc_EphR_A…	-5.02792
30.2.99	signalling.receptor kinases.misc	i3_LQ_LWC_c10289/f1p0/3764	Transcript	highly similar to ( 859) AT5G65700 | Symbols: BAM1 | BAM1 (BARELY ANY MERISTEM 1); ATP binding / kinase/ protein serine/threonine kinase | chr5:26281826-26284945 FORWARDmoderately similar to ( 227) RPK1_IPONI Receptor-like protein kinase precursor (EC 2.7.11.1) - Ipomoea nil (Japanese morning glory) (Pharbitis nil) S_TKc Pkinase_Tyr Pkinase S_TKc PTKc TyrKc SPS1 PTKc_Jak_rpt2 PTKc_Src_like PTKc_S…	7.04688
30.2.99	signalling.receptor kinases.misc	i1_LQ_LWC_c4803/f1p7/1738	Transcript	moderately similar to ( 263) AT1G33260 | Symbols: | protein kinase family protein | chr1:12064796-12066114 FORWARDweakly similar to ( 162) NORK_MEDTR Nodulation receptor kinase precursor (EC 2.7.11.1) (Does not make infections protein 2) (Symbiosis receptor-like kinase) (MtSYMRK) - Medicago truncatula (Barrel medic) S_TKc S_TKc Pkinase Pkinase_Tyr TyrKc PTKc SPS1 PTKc_Src_like PTKc_Ror PTKc_Jak_r…	1.79068
30.2.99	signalling.receptor kinases.misc	i1_LQ_LWC_c6943/f1p0/1520	Transcript	highly similar to ( 931) AT1G75820 | Symbols: CLV1, FAS3, FLO5 | CLV1 (CLAVATA 1); ATP binding / kinase/ protein serine/threonine kinase/ receptor signaling protein serine/threonine kinase | chr1:28463631-28466652 REVERSEmoderately similar to ( 244) RPK1_IPONI Receptor-like protein kinase precursor (EC 2.7.11.1) - Ipomoea nil (Japanese morning glory) (Pharbitis nil) Pkinase_Tyr S_TKc S_TKc Pkinas…	-10.2733
BinCode	BinName	#N/A	type	description	input_1hr.txt	protein_modification
29.4	protein.postranslational modification	i4_LQ_LWC_c26181/f1p6/5043	Transcript	moderately similar to ( 365) AT1G03510 | Symbols: | pentatricopeptide (PPR) repeat-containing protein | chr1:876258-877547 REVERSE protein|pentatricopeptide, putative, expressed	0
29.4	protein.postranslational modification	i2_LQ_LWC_c33942/f1p0/2447	Transcript	weakly similar to ( 151) AT2G42390 | Symbols: | protein kinase C substrate, heavy chain-related | chr2:17651381-17652509 REVERSE protein|glucosidase 2 subunit beta precursor, putative, expressed	1.26807
29.4	protein.postranslational modification	i2_LQ_LWC_c48906/f1p1/2517	Transcript	moderately similar to ( 275) AT4G26470 | Symbols: | calcium ion binding | chr4:13371377-13372197 FORWARD protein|EF hand family protein, putative, expressed	9.73599
29.4	protein.postranslational modification	i1_LQ_LWC_c18638/f1p3/1709	Transcript	moderately similar to ( 337) AT2G30360 | Symbols: CIPK11, PKS5, SIP4, SNRK3.22 | SIP4 (SOS3-INTERACTING PROTEIN 4); kinase/ protein kinase | chr2:12937265-12938572 REVERSEmoderately similar to ( 279) CIPK1_ORYSA CIPK-like protein 1 (EC 2.7.11.1) (OsCK1) - Oryza sativa (Rice) S_TKc S_TKc Pkinase SPS1 Pkinase_Tyr TyrKc PTKc PTKc_Csk_like PTKc_Srm_Brk protein|CAMK_KIN1/SNF1/Nim1_like.30 - CAMK inclu…	-1.71598
29.4	protein.postranslational modification	i1_HQ_LWC_c16693/f6p1/1883	Transcript	highly similar to ( 800) AT3G01090 | Symbols: AKIN10 | AKIN10 (Arabidopsis SNF1 kinase homolog 10); protein binding / protein kinase | chr3:31437-33977 REVERSEhighly similar to ( 818) RKIN1_SECCE Carbon catabolite derepressing protein kinase (EC 2.7.11.1) - Secale cereale (Rye) S_TKc S_TKc Pkinase SPS1 Pkinase_Tyr TyrKc PTKc PTKc_FAK PTKc_Srm_Brk PTKc_Jak_rpt2 PTKc_Tec_Rlk PTKc_Tec_like PTKc_PDGF…	0
29.4	protein.postranslational modification	i3_LQ_LWC_c20706/f1p0/3614	Transcript	moderately similar to ( 357) AT3G59410 | Symbols: | protein kinase family protein | chr3:21950575-21959151 FORWARDvery weakly similar to (90.9) SYH_ORYSA Histidyl-tRNA synthetase (EC 6.1.1.21) (Histidine--tRNA ligase) (HisRS) - Oryza sativa (Rice) HisS protein|serine/threonine-protein kinase GCN2, putative, expressed	9.80479
29.4	protein.postranslational modification	i2_LQ_LWC_c133698/f1p0/2028	Transcript	moderately similar to ( 364) AT4G28400 | Symbols: | protein phosphatase 2C, putative / PP2C, putative | chr4:14048499-14050118 FORWARD PP2Cc PP2Cc PP2C PTC1 protein|protein phosphatase 2C, putative, expressed	5.06149
29.4	protein.postranslational modification	i1_HQ_LWC_c11456/f2p3/1688	Transcript	moderately similar to ( 303) AT5G36250 | Symbols: | protein phosphatase 2C, putative / PP2C, putative | chr5:14282590-14284376 FORWARD PP2Cc PP2Cc PP2C PTC1 protein|protein phosphatase 2C, putative, expressed	6.17411
29.4	protein.postranslational modification	i2_LQ_LWC_c37172/f1p1/3009	Transcript	highly similar to ( 660) AT4G24480 | Symbols: | serine/threonine protein kinase, putative | chr4:12650410-12654755 FORWARDweakly similar to ( 110) NORK_MEDTR Nodulation receptor kinase precursor (EC 2.7.11.1) (Does not make infections protein 2) (Symbiosis receptor-like kinase) (MtSYMRK) - Medicago truncatula (Barrel medic) Pkinase_Tyr S_TKc TyrKc PTKc S_TKc Pkinase PTKc_Src_like PTKc_Jak_rpt2 PT…	10.2459
29.4	protein.postranslational modification	i1_HQ_LWC_c20561/f2p0/1770	Transcript	moderately similar to ( 420) AT5G01850 | Symbols: | protein kinase, putative | chr5:332829-334180 FORWARDvery weakly similar to (86.7) CDC22_ORYSA Cell division control protein 2 homolog 2 (EC 2.7.11.22) - Oryza sativa (Rice) TyrKc Pkinase_Tyr PTKc S_TKc S_TKc Pkinase PTKc_Fes_like PTKc_Csk_like PTKc_Jak_rpt2 PTKc_Tec_like PTKc_Src_like PTKc_Ack_like PTKc_Syk_like PTKc_InsR_like PTKc_Tec_Rlk PTKc…	-4.09694
29.4	protein.postranslational modification	i1_HQ_LWC_c8829/f2p0/1588	Transcript	moderately similar to ( 437) AT1G05750 | Symbols: PDE247, CLB19 | PDE247 (pigment defective 247) | chr1:1721523-1723025 FORWARDvery weakly similar to (99.4) RF1_ORYSA Rf1 protein, mitochondrial precursor (PPR protein) (Fertility restorer) (Restorer for CMS) - Oryza sativa (Rice) protein|tetratricopeptide-like helical, putative, expressed	7.42903
29.4	protein.postranslational modification	i2_LQ_LWC_c88680/f1p0/2146	Transcript	moderately similar to ( 251) AT1G33770 | Symbols: | protein kinase family protein | chr1:12242126-12244462 FORWARDweakly similar to ( 143) CDC2_MAIZE Cell division control protein 2 homolog (EC 2.7.11.22) (EC 2.7.11.23) (p34cdc2) - Zea mays (Maize) S_TKc Pkinase S_TKc SPS1 protein|protein kinase domain containing protein, expressed	-5.63371
29.4	protein.postranslational modification	i2_LQ_LWC_c38621/f1p1/2252	Transcript	moderately similar to ( 453) AT3G47840 | Symbols: | pentatricopeptide (PPR) repeat-containing protein | chr3:17651912-17654032 FORWARDvery weakly similar to (81.6) RF1_ORYSA Rf1 protein, mitochondrial precursor (PPR protein) (Fertility restorer) (Restorer for CMS) - Oryza sativa (Rice) protein|pentatricopeptide, putative, expressed	0
29.4	protein.postranslational modification	i2_LQ_LWC_c102717/f1p0/2367	Transcript	moderately similar to ( 315) AT1G78230 | Symbols: | protein binding | chr1:29430226-29432516 FORWARD protein|leucine rich repeat domain containing protein, putative, expressed	-6.05098
29.4	protein.postranslational modification	i2_HQ_LWC_c115509/f2p2/2111	Transcript	highly similar to ( 579) AT2G31800 | Symbols: | ankyrin protein kinase, putative | chr2:13520605-13523646 REVERSEvery weakly similar to (82.4) CIPK1_ORYSA CIPK-like protein 1 (EC 2.7.11.1) (OsCK1) - Oryza sativa (Rice) TyrKc Pkinase_Tyr PTKc S_TKc S_TKc Pkinase PTKc_Csk_like PTKc_Src_like PTKc_Jak_rpt2 PTKc_Srm_Brk PTKc_Fes_like PTKc_Tec_like PTKc_EphR PTKc_Chk PTKc_Abl PTKc_Frk_like PTKc_Lyn PTK…	-2.98684
29.4	protein.postranslational modification	i1_LQ_LWC_c10525/f1p2/1870	Transcript	nearly identical (1040) AT3G25800 | Symbols: PDF1, PR 65, PP2AA2 | PP2AA2 (PROTEIN PHOSPHATASE 2A SUBUNIT A2); protein phosphatase type 2A regulator | chr3:9423036-9425783 REVERSEhighly similar to ( 673) 2AAA_PEA Protein phosphatase PP2A regulatory subunit A (PR65) (Fragment) - Pisum sativum (Garden pea) protein|HEAT repeat family protein, putative, expressed	4.13461
29.4	protein.postranslational modification	i1_HQ_LWC_c9474/f2p0/1543	Transcript	moderately similar to ( 353) AT1G04130 | Symbols: | tetratricopeptide repeat (TPR)-containing protein | chr1:1073465-1075374 FORWARD protein|tetratricopeptide repeat domain containing protein, expressed	-0.741994
29.4	protein.postranslational modification	i1_HQ_LWC_c5454/f2p0/1664	Transcript	highly similar to ( 652) AT4G01370 | Symbols: ATMPK4, MPK4 | ATMPK4 (ARABIDOPSIS THALIANA MAP KINASE 4); MAP kinase/ kinase | chr4:567219-568889 FORWARDhighly similar to ( 758) MPK6_ORYSA Mitogen-activated protein kinase 6 (EC 2.7.11.24) (MAP kinase 6) - Oryza sativa (Rice) S_TKc S_TKc Pkinase SPS1 TyrKc Pkinase_Tyr PTKc PTKc_Srm_Brk PTKc_Jak_rpt2 PTKc_Trk PTKc_InsR_like PTKc_Src_like PTKc_Jak1_r…	12.7043
29.4	protein.postranslational modification	i1_HQ_LWC_c9365/f5p0/1635	Transcript	highly similar to ( 528) AT1G60940 | Symbols: SNRK2-10, SNRK2.10, SRK2B | SNRK2.10 (SNF1-RELATED PROTEIN KINASE 2.10); kinase | chr1:22439398-22441896 REVERSEhighly similar to ( 671) SAPK6_ORYSA Serine/threonine-protein kinase SAPK6 (EC 2.7.11.1) (Osmotic stress/abscisic acid-activated protein kinase 6) - Oryza sativa (Rice) S_TKc S_TKc Pkinase SPS1 Pkinase_Tyr TyrKc PTKc PTKc_Csk_like PTKc_Ack_l…	4.80174
29.4	protein.postranslational modification	i2_HQ_LWC_c11258/f10p2/2294	Transcript	moderately similar to ( 360) AT4G08500 | Symbols: MEKK1, ATMEKK1, MAPKKK8, ARAKIN | MEKK1 (MAP KINASE KINASE KINASE 1); DNA binding / MAP kinase kinase kinase/ kinase/ kinase binding / protein binding | chr4:5404272-5407062 REVERSEweakly similar to ( 123) CIPK1_ORYSA CIPK-like protein 1 (EC 2.7.11.1) (OsCK1) - Oryza sativa (Rice) S_TKc S_TKc Pkinase Pkinase_Tyr TyrKc PTKc SPS1 PTKc_FAK PTKc_Ack_l…	-5.7816
29.4	protein.postranslational modification	i1_LQ_LWC_c33166/f1p2/1976	Transcript	moderately similar to ( 223) AT3G06270 | Symbols: | protein phosphatase 2C, putative / PP2C, putative | chr3:1896763-1897887 FORWARD PP2Cc PP2Cc PP2C PTC1 protein|protein phosphatase 2C, putative, expressed	3.69356
29.4	protein.postranslational modification	i2_LQ_LWC_c13982/f1p0/2089	Transcript	moderately similar to ( 347) AT4G14170 | Symbols: | pentatricopeptide (PPR) repeat-containing protein | chr4:8176709-8178085 REVERSEvery weakly similar to (89.7) RF1_ORYSA Rf1 protein, mitochondrial precursor (PPR protein) (Fertility restorer) (Restorer for CMS) - Oryza sativa (Rice) protein|pentatricopeptide, putative, expressed	0
29.4	protein.postranslational modification	i4_LQ_LWC_c2493/f1p2/4994	Transcript	moderately similar to ( 274) AT4G21065 | Symbols: | FUNCTIONS IN: molecular_function unknown; INVOLVED IN: biological_process unknown; CONTAINS InterPro DOMAIN/s: Pentatricopeptide repeat (InterPro:IPR002885); BEST Arabidopsis thaliana protein match is: pentatricopeptide (PPR) repeat-containing protein (TAIR:AT4G33170.1); Has 16184 Blast hits to 5257 proteins in 175 species: Archae - 0; Bacteria …	0
29.4	protein.postranslational modification	i3_LQ_LWC_c21523/f1p0/3360	Transcript	highly similar to ( 899) AT5G22470 | Symbols: | NAD+ ADP-ribosyltransferase | chr5:7447045-7450743 FORWARDnearly identical (1652) PARP3_ORYSA Poly [ADP-ribose] polymerase 3 (EC 2.4.2.30) (PARP-3) (ADPRT 3) (NAD(+) ADP-ribosyltransferase 3) (Poly[ADP-ribose] synthetase 3) - Oryza sativa (Rice) parp_like PARP protein|poly synthetase 3, putative, expressed	7.75338
29.4	protein.postranslational modification	i1_LQ_LWC_c22151/f1p0/1798	Transcript	moderately similar to ( 320) AT2G34650 | Symbols: PID, ABR | PID (PINOID); kinase/ protein kinase/ protein serine/threonine kinase | chr2:14589934-14591557 REVERSEmoderately similar to ( 272) KPK1_PHAVU Protein kinase PVPK-1 (EC 2.7.11.1) - Phaseolus vulgaris (Kidney bean) (French bean) S_TKc S_TKc Pkinase SPS1 Pkinase_Tyr TyrKc PTKc protein|AGC_PVPK_like_kin82y.9 - ACG kinases include homologs t…	2.10643
29.4	protein.postranslational modification	i3_LQ_LWC_c24878/f1p32/3407	Transcript	nearly identical (1157) AT2G31320 | Symbols: PARP2, ATPARP2 | PARP2 (POLY(ADP-RIBOSE) POLYMERASE 2); DNA binding / NAD or NADH binding / NAD+ ADP-ribosyltransferase/ zinc ion binding | chr2:13354046-13359578 REVERSEnearly identical (1896) PARP1_ORYSA Poly [ADP-ribose] polymerase 1 (EC 2.4.2.30) (PARP-1) (ADPRT 1) (NAD(+) ADP-ribosyltransferase 1) (Poly[ADP-ribose] synthetase 1) - Oryza sativa (Ri…	2.59729
29.4	protein.postranslational modification	i2_LQ_LWC_c69163/f1p1/2113	Transcript	highly similar to ( 513) AT5G58380 | Symbols: CIPK10, PKS2, SIP1, SNRK3.8 | SIP1 (SOS3-INTERACTING PROTEIN 1); ATP binding / kinase/ protein kinase/ protein serine/threonine kinase | chr5:23597092-23598531 REVERSEmoderately similar to ( 384) CIPK1_ORYSA CIPK-like protein 1 (EC 2.7.11.1) (OsCK1) - Oryza sativa (Rice) S_TKc S_TKc Pkinase Pkinase_Tyr SPS1 TyrKc PTKc PTKc_Srm_Brk PTKc_Csk_like PTKc_F…	2.89497
29.4	protein.postranslational modification	i2_LQ_LWC_c47216/f1p1/2243	Transcript	highly similar to ( 520) AT1G78290 | Symbols: | serine/threonine protein kinase, putative | chr1:29457457-29458909 REVERSEhighly similar to ( 691) SAPK1_ORYSA Serine/threonine-protein kinase SAPK1 (EC 2.7.11.1) (Osmotic stress/abscisic acid-activated protein kinase 1) - Oryza sativa (Rice) S_TKc S_TKc Pkinase SPS1 TyrKc Pkinase_Tyr PTKc PTKc_Jak_rpt2 PTKc_Tyk2_rpt2 PTKc_Tec_like PTKc_Btk_Bmx prot…	-3.88483
29.4	protein.postranslational modification	i2_LQ_LWC_c48105/f1p1/2361	Transcript	moderately similar to ( 275) AT5G10530 | Symbols: | lectin protein kinase, putative | chr5:3324978-3326933 REVERSEweakly similar to ( 153) NORK_MEDTR Nodulation receptor kinase precursor (EC 2.7.11.1) (Does not make infections protein 2) (Symbiosis receptor-like kinase) (MtSYMRK) - Medicago truncatula (Barrel medic) S_TKc Pkinase S_TKc Lectin_legB Pkinase_Tyr TyrKc PTKc PTKc_Jak_rpt2 SPS1 PTKc_Ep…	9.67679
29.4	protein.postranslational modification	i1_LQ_LWC_c32036/f1p4/2057	Transcript	moderately similar to ( 462) AT1G02970 | Symbols: WEE1, ATWEE1 | WEE1 (ARABIDOPSIS WEE1 KINASE HOMOLOG); kinase/ protein kinase | chr1:673408-676127 FORWARDvery weakly similar to (90.1) M2K1_ORYSA Mitogen-activated protein kinase kinase 1 (EC 2.7.12.2) (MAP kinase kinase 1) (MAPKK1) (OsMEK1) - Oryza sativa (Rice) Pkinase S_TKc S_TKc SPS1 Pkinase_Tyr PTKc TyrKc protein|wee1-like protein kinase, pu…	-2.87175
29.4	protein.postranslational modification	i1_LQ_LWC_c33057/f1p0/1882	Transcript	moderately similar to ( 500) AT4G33950 | Symbols: OST1, SNRK2-6, SRK2E, SNRK2.6, P44 | OST1 (OPEN STOMATA 1); calcium-dependent protein serine/threonine kinase/ kinase/ protein kinase | chr4:16272819-16274657 FORWARDhighly similar to ( 615) SAPK3_ORYSA Serine/threonine-protein kinase SAPK3 (EC 2.7.11.1) (Osmotic stress/abscisic acid-activated protein kinase 3) (Protein kinase REK) - Oryza sativa …	4.80737
29.4	protein.postranslational modification	i1_LQ_LWC_c18643/f1p0/1472	Transcript	moderately similar to ( 373) AT1G34750 | Symbols: | protein phosphatase 2C, putative / PP2C, putative | chr1:12736386-12737727 REVERSE PP2Cc PP2Cc PP2C PTC1 protein|protein phosphatase 2C, putative, expressed	4.95162
29.4	protein.postranslational modification	i1_LQ_LWC_c11264/f1p0/1519	Transcript	moderately similar to ( 261) AT3G04530 | Symbols: PPCK2, PEPCK2 | PPCK2; kinase/ protein serine/threonine kinase | chr3:1221546-1222456 FORWARDmoderately similar to ( 208) CDPK3_ORYSA Calcium-dependent protein kinase, isoform 11 (EC 2.7.11.1) (CDPK 11) - Oryza sativa (Rice) S_TKc S_TKc Pkinase SPS1 Pkinase_Tyr TyrKc PTKc PTKc_Srm_Brk PTKc_Src_like PTKc_Tec_like protein|calcium-dependent protein k…	3.9278
29.4	protein.postranslational modification	i1_HQ_LWC_c2261/f3p0/1670	Transcript	highly similar to ( 541) AT3G15610 | Symbols: | transducin family protein / WD-40 repeat family protein | chr3:5291076-5292796 REVERSE WD40 COG2319 protein|WD domain, G-beta repeat domain containing protein, expressed	2.3562
29.4	protein.postranslational modification	i2_LQ_LWC_c86448/f1p2/2557	Transcript	moderately similar to ( 443) AT3G53380 | Symbols: | lectin protein kinase family protein | chr3:19789204-19791351 REVERSEweakly similar to ( 195) NORK_MEDTR Nodulation receptor kinase precursor (EC 2.7.11.1) (Does not make infections protein 2) (Symbiosis receptor-like kinase) (MtSYMRK) - Medicago truncatula (Barrel medic) Pkinase S_TKc S_TKc TyrKc Lectin_legB PTKc Pkinase_Tyr PTKc_Src_like SPS1 …	11.9183
29.4	protein.postranslational modification	i3_LQ_LWC_c22964/f1p3/3494	Transcript	nearly identical (1028) AT2G40730 | Symbols: | HEAT repeat-containing protein | chr2:16990083-16996072 REVERSE protein|HEAT repeat family protein, putative, expressed	6.31432
29.4	protein.postranslational modification	i2_LQ_LWC_c32355/f1p2/2550	Transcript	highly similar to ( 717) AT5G40440 | Symbols: ATMKK3, MKK3 | ATMKK3 (ARABIDOPSIS THALIANA MITOGEN-ACTIVATED PROTEIN KINASE KINASE 3); MAP kinase kinase | chr5:16182149-16184513 FORWARDmoderately similar to ( 256) M2K1_ORYSA Mitogen-activated protein kinase kinase 1 (EC 2.7.12.2) (MAP kinase kinase 1) (MAPKK1) (OsMEK1) - Oryza sativa (Rice) S_TKc S_TKc Pkinase SPS1 Pkinase_Tyr PTKc TyrKc PTKc_EphR…	-13.1977
29.4	protein.postranslational modification	i1_LQ_LWC_c4721/f1p2/1918	Transcript	moderately similar to ( 248) AT4G33500 | Symbols: | protein phosphatase 2C-related / PP2C-related | chr4:16112835-16116243 REVERSE protein|expressed protein	-12.3943
29.4	protein.postranslational modification	i2_HQ_LWC_c3720/f4p0/2732	Transcript	highly similar to ( 611) AT2G03380 | Symbols: | pentatricopeptide (PPR) repeat-containing protein | chr2:1028292-1030361 FORWARDvery weakly similar to (87.0) RF1_ORYSA Rf1 protein, mitochondrial precursor (PPR protein) (Fertility restorer) (Restorer for CMS) - Oryza sativa (Rice) protein|pentatricopeptide, putative, expressed	7.37904
29.4	protein.postranslational modification	i2_LQ_LWC_c2190/f2p0/2662	Transcript	moderately similar to ( 301) AT4G35500 | Symbols: | protein kinase family protein | chr4:16857475-16859407 FORWARD S_TKc S_TKc Pkinase protein|expressed protein	-9.90691
29.4	protein.postranslational modification	i1_LQ_LWC_c12368/f1p0/1899	Transcript	moderately similar to ( 333) AT3G14370 | Symbols: WAG2 | WAG2; kinase/ protein serine/threonine kinase | chr3:4798026-4799468 REVERSEmoderately similar to ( 278) KPK1_PHAVU Protein kinase PVPK-1 (EC 2.7.11.1) - Phaseolus vulgaris (Kidney bean) (French bean) S_TKc S_TKc Pkinase Pkinase_Tyr SPS1 TyrKc PTKc protein|AGC_PVPK_like_kin82y.8 - ACG kinases include homologs to PKA, PKG and PKC, expressed	-3.614
29.4	protein.postranslational modification	i2_LQ_LWC_c17641/f1p1/2627	Transcript	highly similar to ( 726) AT3G45100 | Symbols: SETH2 | SETH2; transferase, transferring glycosyl groups | chr3:16504648-16506858 FORWARD PIGA RfaG Glycos_transf_1 protein|glycosyl transferase, group 1 domain containing protein, expressed	6.80164
29.4	protein.postranslational modification	i1_LQ_LWC_c13380/f1p6/1346	Transcript	highly similar to ( 622) AT1G50370 | Symbols: | serine/threonine protein phosphatase, putative | chr1:18658894-18661672 FORWARDmoderately similar to ( 388) PP2A3_ORYSA Serine/threonine-protein phosphatase PP2A-3 catalytic subunit (EC 3.1.3.16) - Oryza sativa (Rice) PP2Ac PP2Ac ApaH Metallophos protein|Ser/Thr protein phosphatase family protein, putative, expressed	-7.46348
29.4	protein.postranslational modification	i2_HQ_LWC_c36401/f2p0/2753	Transcript	moderately similar to ( 368) AT3G04910 | Symbols: WNK1, ZIK4 | WNK1 (WITH NO LYSINE (K) 1); kinase/ protein kinase/ protein serine/threonine kinase | chr3:1356061-1358057 FORWARDvery weakly similar to (84.7) M2K1_ORYSA Mitogen-activated protein kinase kinase 1 (EC 2.7.12.2) (MAP kinase kinase 1) (MAPKK1) (OsMEK1) - Oryza sativa (Rice) S_TKc S_TKc Pkinase TyrKc Pkinase_Tyr SPS1 PTKc PTKc_Tec_like …	7.73366
29.4	protein.postranslational modification	i1_HQ_LWC_c18093/f2p0/1628	Transcript	highly similar to ( 620) AT5G55260 | Symbols: PPX2, PPX-2 | PPX2 (PROTEIN PHOSPHATASE X 2); protein serine/threonine phosphatase | chr5:22416808-22418621 FORWARDmoderately similar to ( 454) PP2A_TOBAC Serine/threonine-protein phosphatase PP2A catalytic subunit (EC 3.1.3.16) - Nicotiana tabacum (Common tobacco) PP2Ac PP2Ac ApaH Metallophos protein|Ser/Thr protein phosphatase family protein, putati…	2.16037
29.4	protein.postranslational modification	i2_LQ_LWC_c34898/f1p0/2417	Transcript	highly similar to ( 649) AT1G13460 | Symbols: | serine/threonine protein phosphatase 2A (PP2A) regulatory subunit B', putative | chr1:4616504-4618180 FORWARD B56 protein|transposon protein, putative, unclassified, expressed	8.50292
29.4	protein.postranslational modification	i1_LQ_LWC_c18170/f2p0/1943	Transcript	moderately similar to ( 293) AT4G35780 | Symbols: | protein kinase family protein | chr4:16946729-16950405 REVERSE ACT_TyrKc protein|serine/threonine-protein kinase CTR1, putative, expressed	7.35222
29.4	protein.postranslational modification	i1_LQ_LWC_c34393/f1p0/1930	Transcript	moderately similar to ( 390) AT3G59380 | Symbols: FTA, PLP, ATFTA, PFT/PGGT-IALPHA | FTA (FARNESYLTRANSFERASE A); farnesyltranstransferase/ protein heterodimerization/ protein prenyltransferase | chr3:21944209-21945781 FORWARDmoderately similar to ( 393) PFTA_PEA Protein farnesyltransferase/geranylgeranyltransferase type I alpha subunit (EC 2.5.1.58) (EC 2.5.1.59) (CAAX farnesyltransferase alpha …	10.1789
29.4	protein.postranslational modification	i1_HQ_LWC_c37377/f2p2/1251	Transcript	moderately similar to ( 216) AT5G08160 | Symbols: ATPK3 | ATPK3; ATP binding / kinase/ protein kinase/ protein serine/threonine kinase | chr5:2625903-2627942 REVERSE protein|serine/threonine-protein kinase 16, putative, expressed	2.75197
29.4	protein.postranslational modification	i3_LQ_LWC_c10042/f1p2/3516	Transcript	highly similar to ( 536) AT1G10940 | Symbols: ASK1, SNRK2-4, SNRK2.4, SRK2A | SNRK2.4 (SNF1-RELATED PROTEIN KINASE 2.4); kinase | chr1:3656050-3658170 REVERSEhighly similar to ( 690) SAPK4_ORYSA Serine/threonine-protein kinase SAPK4 (EC 2.7.11.1) (Osmotic stress/abscisic acid-activated protein kinase 4) - Oryza sativa (Rice) S_TKc S_TKc Pkinase SPS1 Pkinase_Tyr TyrKc PTKc PTKc_Ack_like PTKc_Syk_l…	11.7595
29.4	protein.postranslational modification	i2_LQ_LWC_c7321/f1p0/2476	Transcript	moderately similar to ( 206) AT5G08510 | Symbols: | pentatricopeptide (PPR) repeat-containing protein | chr5:2753099-2754731 FORWARD protein|pentatricopeptide, putative, expressed	7.15878
29.4	protein.postranslational modification	i1_LQ_LWC_c26854/f1p0/1221	Transcript	nearly identical (1082) AT3G03940 | Symbols: | protein kinase family protein | chr3:1014412-1018244 REVERSE Pkinase S_TKc SPS1 S_TKc protein|CK1_CaseinKinase_1a.3 - CK1 includes the casein kinase 1 kinases, expressed	0
29.4	protein.postranslational modification	i1_LQ_LWC_c18449/f1p0/1841	Transcript	moderately similar to ( 422) AT1G49160 | Symbols: WNK7 | WNK7; kinase/ protein kinase | chr1:18179473-18181867 REVERSEvery weakly similar to (98.2) M2K1_ORYSA Mitogen-activated protein kinase kinase 1 (EC 2.7.12.2) (MAP kinase kinase 1) (MAPKK1) (OsMEK1) - Oryza sativa (Rice) S_TKc S_TKc Pkinase Pkinase_Tyr TyrKc PTKc SPS1 PTKc_Jak2_Jak3_rpt2 PTKc_Jak_rpt2 PTKc_Srm_Brk PTKc_Frk_like PTKc_Src_like…	0
29.4	protein.postranslational modification	i3_LQ_LWC_c21361/f1p8/3289	Transcript	moderately similar to ( 449) AT2G22410 | Symbols: | pentatricopeptide (PPR) repeat-containing protein | chr2:9509035-9511080 FORWARDweakly similar to ( 117) RF1_ORYSA Rf1 protein, mitochondrial precursor (PPR protein) (Fertility restorer) (Restorer for CMS) - Oryza sativa (Rice) protein|pentatricopeptide, putative, expressed	-2.52547
29.4	protein.postranslational modification	i1_HQ_LWC_c39472/f4p0/1964	Transcript	highly similar to ( 535) AT4G14340 | Symbols: CKI1, CKL11 | CKI1 (CASEIN KINASE I); kinase/ protein serine/threonine kinase | chr4:8248532-8251668 REVERSE S_TKc Pkinase SPS1 S_TKc protein|CK1_CaseinKinase_1.7 - CK1 includes the casein kinase 1 kinases, expressed	4.87912
29.4	protein.postranslational modification	i1_LQ_LWC_c27147/f1p0/1372	Transcript	moderately similar to ( 368) AT5G64960 | Symbols: CDKC2, CDKC;2 | CDKC2 (Cyclin dependent kinase group C 2); kinase | chr5:25956150-25958427 FORWARDmoderately similar to ( 257) CDC2A_ANTMA Cell division control protein 2 homolog A (EC 2.7.11.22) (EC 2.7.11.23) - Antirrhinum majus (Garden snapdragon) S_TKc S_TKc Pkinase SPS1 Pkinase_Tyr TyrKc PTKc PTKc_Jak_rpt2 PTKc_Srm_Brk PTKc_Src_like PTKc_ALK_…	8.3135
29.4	protein.postranslational modification	i11_LQ_LWC_c33/f1p0/11424	Transcript	highly similar to ( 785) AT5G10290 | Symbols: | leucine-rich repeat family protein / protein kinase family protein | chr5:3235462-3238171 REVERSEmoderately similar to ( 215) PSKR_DAUCA Phytosulfokine receptor precursor (EC 2.7.11.1) (Phytosulfokine LRR receptor kinase) - Daucus carota (Carrot) PTKc Pkinase_Tyr TyrKc S_TKc Pkinase S_TKc PTKc_Csk_like PTKc_Jak_rpt2 PTKc_EGFR_like PTKc_InsR_like PTK…	-11.6491
29.4	protein.postranslational modification	i1_LQ_LWC_c31031/f1p0/1918	Transcript	weakly similar to ( 186) AT3G23610 | Symbols: | dual specificity protein phosphatase (DsPTP1) | chr3:8478280-8479641 FORWARDvery weakly similar to (93.6) PTP3_CHLEU Dual specificity protein phosphatase (EC 3.1.3.48) (EC 3.1.3.16) - Chlamydomonas eugametos DSPc DSPc DSPc protein|dual specificity protein phosphatase, putative, expressed	-0.817924
29.4	protein.postranslational modification	i1_HQ_LWC_c10874/f2p0/1841	Transcript	highly similar to ( 570) AT4G28880 | Symbols: ckl3 | ckl3 (Casein Kinase I-like 3); ATP binding / kinase/ protein kinase/ protein serine/threonine kinase | chr4:14251351-14254048 FORWARD S_TKc Pkinase SPS1 S_TKc protein|CK1_CaseinKinase_1.1 - CK1 includes the casein kinase 1 kinases, expressed	2.02559
29.4	protein.postranslational modification	i2_LQ_LWC_c85371/f1p0/2750	Transcript	moderately similar to ( 471) AT1G18670 | Symbols: IBS1 | IBS1 (IMPAIRED IN BABA-INDUCED STERILITY 1); ATP binding / kinase/ protein kinase/ protein serine/threonine kinase/ protein tyrosine kinase | chr1:6427242-6430696 REVERSEweakly similar to ( 194) KC47_ORYSA CDC2+/CDC28-related protein kinase R2 (EC 2.7.11.22) - Oryza sativa (Rice) S_TKc S_TKc Pkinase SPS1 Pkinase_Tyr PTKc TyrKc PTKc_Jak_rpt2…	0
29.4	protein.postranslational modification	i3_LQ_LWC_c19229/f1p5/3166	Transcript	highly similar to ( 561) AT1G77010 | Symbols: | pentatricopeptide (PPR) repeat-containing protein | chr1:28942710-28944797 FORWARDvery weakly similar to ( 100) RF1_ORYSA Rf1 protein, mitochondrial precursor (PPR protein) (Fertility restorer) (Restorer for CMS) - Oryza sativa (Rice) protein|pentatricopeptide, putative, expressed	8.22489
29.4	protein.postranslational modification	i1_HQ_LWC_c24132/f2p2/1576	Transcript	highly similar to ( 603) AT3G50000 | Symbols: CKA2, ATCKA2 | CKA2 (CASEIN KINASE II, ALPHA CHAIN 2); kinase | chr3:18534487-18536743 FORWARDhighly similar to ( 605) CSK2A_MAIZE Casein kinase II subunit alpha (EC 2.7.11.1) (CK II) (CK2-alpha) - Zea mays (Maize) Pkinase S_TKc S_TKc SPS1 PTKc TyrKc Pkinase_Tyr protein|casein kinase II subunit alpha-2, putative, expressed	-5.19437
29.4	protein.postranslational modification	i4_LQ_LWC_c40487/f1p0/4083	Transcript	highly similar to ( 575) AT5G58380 | Symbols: CIPK10, PKS2, SIP1, SNRK3.8 | SIP1 (SOS3-INTERACTING PROTEIN 1); ATP binding / kinase/ protein kinase/ protein serine/threonine kinase | chr5:23597092-23598531 REVERSEmoderately similar to ( 439) CIPK1_ORYSA CIPK-like protein 1 (EC 2.7.11.1) (OsCK1) - Oryza sativa (Rice) S_TKc S_TKc Pkinase SPS1 Pkinase_Tyr TyrKc PTKc PTKc_Csk_like PTKc_Srm_Brk PTKc_F…	6.57
29.4	protein.postranslational modification	i2_LQ_LWC_c112133/f1p0/2091	Transcript	moderately similar to ( 295) AT3G25840 | Symbols: | protein kinase family protein | chr3:9452993-9456322 REVERSEvery weakly similar to (97.4) MSK1_MEDSA Glycogen synthase kinase-3 homolog MsK-1 (EC 2.7.11.1) - Medicago sativa (Alfalfa) S_TKc S_TKc Pkinase SPS1 protein|protein kinase, putative, expressed	8.54505
29.4	protein.postranslational modification	i2_LQ_LWC_c103378/f1p0/2509	Transcript	moderately similar to ( 427) AT4G14820 | Symbols: | pentatricopeptide (PPR) repeat-containing protein | chr4:8507794-8510038 REVERSE protein|pentatricopeptide, putative, expressed	-5.40875
29.4	protein.postranslational modification	i1_LQ_LWC_c17544/f1p0/1827	Transcript	moderately similar to ( 454) AT5G60550 | Symbols: GRIK2, ATSNAK1 | GRIK2 (GEMINIVIRUS REP INTERACTING KINASE 2); kinase | chr5:24340135-24342356 FORWARDweakly similar to ( 162) CIPK1_ORYSA CIPK-like protein 1 (EC 2.7.11.1) (OsCK1) - Oryza sativa (Rice) S_TKc S_TKc Pkinase Pkinase_Tyr SPS1 TyrKc PTKc PTKc_Jak_rpt2 PTKc_Src_like PTKc_Ack_like PTKc_Jak1_rpt2 PTKc_Abl PTKc_Frk_like PTKc_Syk_like PTKc…	0
29.4	protein.postranslational modification	i1_HQ_LWC_c24128/f2p2/1978	Transcript	moderately similar to ( 300) AT2G29380 | Symbols: | protein phosphatase 2C, putative / PP2C, putative | chr2:12608855-12610124 FORWARD PP2Cc PP2Cc PP2C PTC1 protein|protein phosphatase 2C, putative, expressed	-9.68854
29.4	protein.postranslational modification	i1_LQ_LWC_c34421/f1p6/1943	Transcript	highly similar to ( 757) AT4G30700 | Symbols: | pentatricopeptide (PPR) repeat-containing protein | chr4:14962617-14964995 REVERSEweakly similar to ( 102) RF1_ORYSA Rf1 protein, mitochondrial precursor (PPR protein) (Fertility restorer) (Restorer for CMS) - Oryza sativa (Rice) protein|pentatricopeptide, putative, expressed	-2.05281
29.4	protein.postranslational modification	i2_LQ_LWC_c127036/f3p3/2683	Transcript	highly similar to ( 532) AT2G40120 | Symbols: | protein kinase family protein | chr2:16755137-16757258 REVERSEweakly similar to ( 123) MPK17_ORYSA Mitogen-activated protein kinase 17 (EC 2.7.11.24) (MAP kinase 17) - Oryza sativa (Rice) S_TKc S_TKc Pkinase SPS1 Pkinase_Tyr TyrKc PTKc protein|protein kinase family protein, putative, expressed	10.2718
29.4	protein.postranslational modification	i1_LQ_LWC_c2788/f2p0/1923	Transcript	highly similar to ( 720) AT1G30270 | Symbols: CIPK23, SnRK3.23, ATCIPK23, LKS1 | CIPK23 (CBL-INTERACTING PROTEIN KINASE 23); kinase/ protein binding / protein serine/threonine kinase | chr1:10655270-10658524 FORWARDhighly similar to ( 603) CIPK1_ORYSA CIPK-like protein 1 (EC 2.7.11.1) (OsCK1) - Oryza sativa (Rice) S_TKc S_TKc Pkinase SPS1 Pkinase_Tyr TyrKc PTKc PTKc_Srm_Brk PTKc_Csk_like PTKc_Jak…	10.1311
29.4	protein.postranslational modification	i1_LQ_LWC_c13775/f1p0/1304	Transcript	moderately similar to ( 413) AT3G60340 | Symbols: | palmitoyl protein thioesterase family protein | chr3:22304395-22306389 FORWARD Palm_thioest protein|palmitoyl-protein thioesterase 1 precursor, putative, expressed	4.69192
29.4	protein.postranslational modification	i3_LQ_LWC_c3973/f1p0/3264	Transcript	highly similar to ( 858) AT3G02330 | Symbols: | pentatricopeptide (PPR) repeat-containing protein | chr3:473881-476592 REVERSEweakly similar to ( 117) RF1_ORYSA Rf1 protein, mitochondrial precursor (PPR protein) (Fertility restorer) (Restorer for CMS) - Oryza sativa (Rice) protein|pentatricopeptide, putative, expressed	6.02187
29.4	protein.postranslational modification	i4_LQ_LWC_c14616/f1p3/4647	Transcript	nearly identical (1502) AT5G18700 | Symbols: EMB3013 | EMB3013 (embryo defective 3013); ATP binding / binding / kinase/ protein kinase/ protein serine/threonine kinase | chr5:6235387-6240733 REVERSEweakly similar to ( 119) M2K1_ORYSA Mitogen-activated protein kinase kinase 1 (EC 2.7.12.2) (MAP kinase kinase 1) (MAPKK1) (OsMEK1) - Oryza sativa (Rice) S_TKc S_TKc Pkinase Pkinase_Tyr PTKc TyrKc SPS1…	-3.17465
29.4	protein.postranslational modification	i3_LQ_LWC_c35726/f1p0/3608	Transcript	moderately similar to ( 211) AT4G13650 | Symbols: | pentatricopeptide (PPR) repeat-containing protein | chr4:7939611-7942898 REVERSE protein|pentatricopeptide repeat-containing protein, putative, expressed	2.39037
29.4	protein.postranslational modification	i2_LQ_LWC_c70592/f1p0/2108	Transcript	moderately similar to ( 444) AT1G03590 | Symbols: | catalytic/ protein serine/threonine phosphatase | chr1:894480-896257 REVERSE PP2Cc PP2Cc PP2C PTC1 protein|protein phosphatase 2C, putative, expressed	8.15704
29.4	protein.postranslational modification	i11_LQ_LWC_c45/f1p0/11275	Transcript	moderately similar to ( 429) AT3G60340 | Symbols: | palmitoyl protein thioesterase family protein | chr3:22304395-22306389 FORWARD Palm_thioest protein|palmitoyl-protein thioesterase 1 precursor, putative, expressed	-4.27944
29.4	protein.postranslational modification	i1_HQ_LWC_c3107/f3p0/1782	Transcript	highly similar to ( 662) AT5G10270 | Symbols: CDKC;1 | CDKC;1 (Cyclin-dependent kinase C;1); kinase | chr5:3221715-3224674 REVERSEmoderately similar to ( 274) CDC21_ORYSA Cell division control protein 2 homolog 1 (EC 2.7.11.22) - Oryza sativa (Rice) S_TKc S_TKc Pkinase SPS1 Pkinase_Tyr TyrKc PTKc PTKc_Jak_rpt2 PTKc_Jak2_Jak3_rpt2 PTKc_Src_like PTKc_Tyk2_rpt2 PTKc_Tec_like PTKc_Jak1_rpt2 PTKc_Frk_…	10.7376
29.4	protein.postranslational modification	i2_HQ_LWC_c24377/f3p0/2257	Transcript	highly similar to ( 542) AT2G28890 | Symbols: PLL4 | PLL4 (POLTERGEIST LIKE 4); catalytic/ protein serine/threonine phosphatase | chr2:12405799-12408062 REVERSE PP2Cc PP2Cc PP2C protein|protein phosphatase 2C, putative, expressed	3.06863
29.4	protein.postranslational modification	i2_HQ_LWC_c35464/f2p2/2303	Transcript	moderately similar to ( 392) AT5G10530 | Symbols: | lectin protein kinase, putative | chr5:3324978-3326933 REVERSEweakly similar to ( 178) NORK_PEA Nodulation receptor kinase precursor (EC 2.7.11.1) - Pisum sativum (Garden pea) Pkinase S_TKc S_TKc TyrKc Pkinase_Tyr PTKc SPS1 PTKc_Srm_Brk PTKc_Trk PTKc_Jak_rpt2 PTKc_EphR PTKc_Syk_like PTKc_Src_like PTKc_Csk_like PTKc_Abl PTKc_Ror PTKc_Frk_like PTK…	-7.92107
29.4	protein.postranslational modification	i1_LQ_LWC_c18422/f1p0/1725	Transcript	weakly similar to ( 169) AT2G33700 | Symbols: | protein phosphatase 2C, putative / PP2C, putative | chr2:14254200-14255784 FORWARDPP2Cc protein|protein phosphatase 2C, putative, expressed	0
29.4	protein.postranslational modification	i3_LQ_LWC_c27134/f1p0/3439	Transcript	highly similar to ( 511) AT5G19020 | Symbols: | pentatricopeptide (PPR) repeat-containing protein | chr5:6352771-6357083 REVERSEweakly similar to ( 110) RF1_ORYSA Rf1 protein, mitochondrial precursor (PPR protein) (Fertility restorer) (Restorer for CMS) - Oryza sativa (Rice) protein|tetratricopeptide-like helical, putative, expressed	8.57072
29.4	protein.postranslational modification	i1_LQ_LWC_c6619/f1p0/1911	Transcript	highly similar to ( 850) AT3G56760 | Symbols: | calcium-dependent protein kinase, putative / CDPK, putative | chr3:21020661-21023756 REVERSEhighly similar to ( 806) CRK_DAUCA CDPK-related protein kinase (EC 2.7.11.1) (PK421) - Daucus carota (Carrot) S_TKc S_TKc Pkinase SPS1 Pkinase_Tyr TyrKc PTKc PTKc_Tec_like PTKc_Src_like PTKc_Btk_Bmx PTKc_Trk PTKc_Srm_Brk PTKc_Itk PTKc_Csk_like PTKc_PDGFR PTKc…	-6.02691
29.4	protein.postranslational modification	i2_LQ_LWC_c20289/f2p0/2479	Transcript	moderately similar to ( 318) AT5G20050 | Symbols: | protein kinase family protein | chr5:6774381-6775739 FORWARDweakly similar to ( 172) KPRO_MAIZE Putative receptor protein kinase ZmPK1 precursor (EC 2.7.11.1) - Zea mays (Maize) S_TKc Pkinase S_TKc Pkinase_Tyr TyrKc PTKc SPS1 PTKc_Ror PTKc_Csk_like PTKc_Itk PTKc_Jak_rpt2 PTKc_EGFR_like PTKc_Srm_Brk PTKc_InsR_like PTKc_Src_like PTKc_Tec_like PTKc…	-7.84017
29.4	protein.postranslational modification	i1_LQ_LWC_c18091/f1p21/2016	Transcript	moderately similar to ( 492) AT1G16220 | Symbols: | protein phosphatase 2C family protein / PP2C family protein | chr1:5548653-5550553 FORWARD PP2Cc PP2Cc PP2C PTC1 protein|protein phosphatase 2C, putative, expressed	11.8065
29.4	protein.postranslational modification	i1_HQ_LWC_c18263/f2p0/1853	Transcript	highly similar to ( 700) AT2G26980 | Symbols: CIPK3 | CIPK3 (CBL-INTERACTING PROTEIN KINASE 3); kinase/ protein kinase/ protein serine/threonine kinase | chr2:11515458-11518205 REVERSEhighly similar to ( 682) CIPK1_ORYSA CIPK-like protein 1 (EC 2.7.11.1) (OsCK1) - Oryza sativa (Rice) S_TKc S_TKc Pkinase SPS1 Pkinase_Tyr PTKc TyrKc PTKc_Jak_rpt2 PTKc_Csk_like PTKc_Srm_Brk NAF PTKc_Fes PTKc_Fes_lik…	10.6714
29.4	protein.postranslational modification	i2_LQ_LWC_c108247/f1p1/2490	Transcript	highly similar to ( 712) AT4G32250 | Symbols: | protein kinase family protein | chr4:15570285-15572528 REVERSE S_TKc S_TKc Pkinase Pkinase_Tyr TyrKc SPS1 PTKc protein|protein kinase domain containing protein, expressed	6.35624
29.4	protein.postranslational modification	i1_LQ_LWC_c13782/f1p0/1299	Transcript	highly similar to ( 659) AT1G54610 | Symbols: | protein kinase family protein | chr1:20393962-20396902 REVERSEmoderately similar to ( 220) CDC2A_ANTMA Cell division control protein 2 homolog A (EC 2.7.11.22) (EC 2.7.11.23) - Antirrhinum majus (Garden snapdragon) S_TKc S_TKc Pkinase SPS1 Pkinase_Tyr PTKc TyrKc PTKc_Jak_rpt2 PTKc_EphR_B PTKc_Src_like PTKc_Tyk2_rpt2 PTKc_Frk_like PTKc_EphR PTKc_Abl …	2.09479
29.4	protein.postranslational modification	i3_LQ_LWC_c18618/f1p1/3897	Transcript	moderately similar to ( 493) AT1G18160 | Symbols: | protein kinase family protein | chr1:6249126-6253835 FORWARDweakly similar to ( 115) PSKR_DAUCA Phytosulfokine receptor precursor (EC 2.7.11.1) (Phytosulfokine LRR receptor kinase) - Daucus carota (Carrot) Pkinase_Tyr TyrKc S_TKc PTKc Pkinase S_TKc PTKc_Src_like PTKc_Abl PTKc_Csk_like PTKc_InsR_like PTKc_Jak_rpt2 PTKc_Srm_Brk PTKc_Tec_like PTKc_…	6.29184
29.4	protein.postranslational modification	i1_LQ_LWC_c21406/f1p29/1793	Transcript	moderately similar to ( 367) AT2G34650 | Symbols: PID, ABR | PID (PINOID); kinase/ protein kinase/ protein serine/threonine kinase | chr2:14589934-14591557 REVERSEmoderately similar to ( 310) KPK1_PHAVU Protein kinase PVPK-1 (EC 2.7.11.1) - Phaseolus vulgaris (Kidney bean) (French bean) S_TKc S_TKc Pkinase SPS1 Pkinase_Tyr TyrKc PTKc PTKc_Jak_rpt2 protein|AGC_PVPK_like_kin82y.20 - ACG kinases inc…	4.51494
29.4	protein.postranslational modification	i1_LQ_LWC_c33049/f1p1/1888	Transcript	highly similar to ( 671) AT4G18710 | Symbols: BIN2, DWF12, UCU1, ATSK21, SK21 | BIN2 (BRASSINOSTEROID-INSENSITIVE 2); glycogen synthase kinase 3/ kinase/ protein kinase | chr4:10296474-10298913 FORWARDhighly similar to ( 606) MSK3_MEDSA Glycogen synthase kinase-3 homolog MsK-3 (EC 2.7.11.1) - Medicago sativa (Alfalfa) S_TKc S_TKc Pkinase SPS1 TyrKc Pkinase_Tyr PTKc PTKc_Jak_rpt2 PTKc_Jak2_Jak3_rp…	-11.3604
29.4	protein.postranslational modification	i1_LQ_LWC_c32326/f1p0/1914	Transcript	moderately similar to ( 410) AT5G53140 | Symbols: | protein phosphatase 2C, putative / PP2C, putative | chr5:21549228-21552132 FORWARD PP2Cc PP2Cc PP2C PTC1 protein|protein phosphatase 2C, putative, expressed	7.93872
29.4	protein.postranslational modification	i1_HQ_LWC_c21012/f3p0/1659	Transcript	highly similar to ( 656) AT2G43790 | Symbols: ATMPK6, MPK6, MAPK6 | ATMPK6 (ARABIDOPSIS THALIANA MAP KINASE 6); MAP kinase/ kinase | chr2:18138477-18140693 FORWARDhighly similar to ( 770) MPK1_ORYSA Mitogen-activated protein kinase 1 (EC 2.7.11.24) (MAP kinase 1) (MAP kinase 6) (OsMAPK6) (OsSIPK) - Oryza sativa (Rice) S_TKc S_TKc Pkinase SPS1 TyrKc Pkinase_Tyr PTKc PTKc_Jak_rpt2 PTKc_Srm_Brk PTKc…	1.32052
29.4	protein.postranslational modification	i2_LQ_LWC_c49473/f1p1/2111	Transcript	moderately similar to ( 379) AT2G44680 | Symbols: CKB4 | CKB4 (CASEIN KINASE II BETA SUBUNIT 4); protein serine/threonine kinase | chr2:18426898-18428166 REVERSE CK_II_beta SKB2 protein|casein kinase II subunit beta-4, putative, expressed	0.936698
29.4	protein.postranslational modification	i2_LQ_LWC_c11157/f4p0/2438	Transcript	highly similar to ( 780) AT3G50530 | Symbols: CRK | CRK (CDPK-related kinase); ATP binding / calcium ion binding / calcium-dependent protein serine/threonine phosphatase/ kinase/ protein kinase/ protein serine/threonine kinase | chr3:18753833-18756487 FORWARDhighly similar to ( 785) CRK_DAUCA CDPK-related protein kinase (EC 2.7.11.1) (PK421) - Daucus carota (Carrot) S_TKc S_TKc Pkinase SPS1 Pkina…	9.6397
29.4	protein.postranslational modification	i4_LQ_LWC_c22666/f1p0/4764	Transcript	weakly similar to ( 107) AT2G28060 | Symbols: | protein kinase-related | chr2:11950174-11950618 REVERSEAMPKBI protein|SNF1-related protein kinase regulatory subunit beta-2, putative, expressed	4.5055
29.4	protein.postranslational modification	i2_LQ_LWC_c70348/f1p5/2762	Transcript	weakly similar to ( 150) AT1G29370 | Symbols: | kinase-related | chr1:10278080-10283024 REVERSEDUF1296 protein|protein of unknown function DUF1296 domain containing protein, expressed	8.51387
29.4	protein.postranslational modification	i1_LQ_LWC_c14456/f1p0/1332	Transcript	moderately similar to ( 452) AT4G29810 | Symbols: ATMKK2, MKK2, MK1 | ATMKK2 (ARABIDOPSIS THALIANA MAP KINASE KINASE 2); MAP kinase kinase/ kinase | chr4:14593479-14595241 REVERSEmoderately similar to ( 439) M2K1_ORYSA Mitogen-activated protein kinase kinase 1 (EC 2.7.12.2) (MAP kinase kinase 1) (MAPKK1) (OsMEK1) - Oryza sativa (Rice) S_TKc S_TKc Pkinase Pkinase_Tyr PTKc TyrKc SPS1 PTKc_Jak_rpt2 …	1.63376
29.4	protein.postranslational modification	i2_LQ_LWC_c103193/f1p2/2354	Transcript	moderately similar to ( 225) AT5G10480 | Symbols: PAS2, PEP | PAS2 (PASTICCINO 2); enoyl-CoA hydratase/ protein tyrosine phosphatase | chr5:3298047-3299980 REVERSE PTPLA protein|expressed protein	0
29.4	protein.postranslational modification	i2_HQ_LWC_c4809/f2p0/2296	Transcript	moderately similar to ( 429) AT3G45410 | Symbols: | lectin protein kinase family protein | chr3:16654019-16656013 REVERSEmoderately similar to ( 211) PSKR_DAUCA Phytosulfokine receptor precursor (EC 2.7.11.1) (Phytosulfokine LRR receptor kinase) - Daucus carota (Carrot) Lectin_legB Pkinase S_TKc TyrKc S_TKc PTKc Pkinase_Tyr PTKc_Csk_like SPS1 PTKc_Jak_rpt2 PTKc_EphR PTKc_Src_like PTKc_Srm_Brk PTK…	-9.12003
29.4	protein.postranslational modification	i3_HQ_LWC_c29430/f2p0/3035	Transcript	moderately similar to ( 281) AT1G48120 | Symbols: | calcineurin-like phosphoesterase family protein | chr1:17774238-17779624 REVERSE protein|transposon protein, putative, unclassified, expressed	1.05645
29.4	protein.postranslational modification	i1_HQ_LWC_c19286/f2p0/1913	Transcript	moderately similar to ( 380) AT3G21220 | Symbols: ATMKK5, ATMAP2K_ALPHA, MAP2K_A, MKK5, ATMEK5, MEK5 | ATMKK5 (ARABIDOPSIS THALIANA MITOGEN-ACTIVATED PROTEIN KINASE KINASE 5); MAP kinase kinase/ kinase | chr3:7445917-7446963 FORWARDweakly similar to ( 193) M2K1_ORYSA Mitogen-activated protein kinase kinase 1 (EC 2.7.12.2) (MAP kinase kinase 1) (MAPKK1) (OsMEK1) - Oryza sativa (Rice) S_TKc S_TKc P…	10.6189
29.4	protein.postranslational modification	i1_LQ_LWC_c7632/f1p22/2003	Transcript	highly similar to ( 548) AT5G37350 | Symbols: | RIO1 family protein | chr5:14793837-14795828 FORWARD RIO1_euk RIO1_like RIO RIO RIO1 RIO1 RIO3_euk RIO2_C COG0478 protein|serine/threonine-protein kinase RIO-like, putative, expressed	7.81925
29.4	protein.postranslational modification	i1_LQ_LWC_c12574/f1p1/1889	Transcript	highly similar to ( 917) AT3G58640 | Symbols: | protein kinase family protein | chr3:21687153-21692675 REVERSEweakly similar to ( 109) NORK_MEDTR Nodulation receptor kinase precursor (EC 2.7.11.1) (Does not make infections protein 2) (Symbiosis receptor-like kinase) (MtSYMRK) - Medicago truncatula (Barrel medic) S_TKc S_TKc Pkinase_Tyr TyrKc PTKc Pkinase PTKc_Csk_like PTKc_Src_like PTKc_EphR PTKc…	-0.899217
29.4	protein.postranslational modification	i1_LQ_LWC_c14068/f1p1/1411	Transcript	moderately similar to ( 208) AT1G08650 | Symbols: PPCK1 | PPCK1 (PHOSPHOENOLPYRUVATE CARBOXYLASE KINASE); kinase/ protein serine/threonine kinase | chr1:2752206-2753232 FORWARDweakly similar to ( 153) CDPK_DAUCA Calcium-dependent protein kinase (EC 2.7.11.1) (CDPK) - Daucus carota (Carrot) S_TKc S_TKc Pkinase SPS1 Pkinase_Tyr PTKc TyrKc PTKc_Tec_like PTKc_Src_like PTKc_Tec_Rlk PTKc_Srm_Brk PTKc_I…	6.84994
29.4	protein.postranslational modification	i2_LQ_LWC_c104327/f1p1/2705	Transcript	highly similar to ( 518) AT1G09000 | Symbols: ANP1, MAPKKK1 | ANP1 (ARABIDOPSIS NPK1-RELATED PROTEIN KINASE 1); MAP kinase kinase kinase/ kinase | chr1:2891111-2894987 FORWARDweakly similar to ( 132) M2K1_ORYSA Mitogen-activated protein kinase kinase 1 (EC 2.7.12.2) (MAP kinase kinase 1) (MAPKK1) (OsMEK1) - Oryza sativa (Rice) S_TKc S_TKc Pkinase Pkinase_Tyr PTKc TyrKc SPS1 PTKc_Jak_rpt2 PTKc_Jak…	10.1092
29.4	protein.postranslational modification	i1_LQ_LWC_c33216/f1p0/1434	Transcript	moderately similar to ( 402) AT2G25620 | Symbols: | protein phosphatase 2C, putative / PP2C, putative | chr2:10903154-10904978 REVERSE PP2Cc PP2Cc PP2C PTC1 protein|protein phosphatase 2C, putative, expressed	4.61497
29.4	protein.postranslational modification	i0_LQ_LWC_c1888/f1p0/600	Transcript	highly similar to ( 571) AT3G08720 | Symbols: ATPK19, ATPK2 | S6K2 (ARABIDOPSIS THALIANA SERINE/THREONINE PROTEIN KINASE 2); kinase/ protein kinase | chr3:2648625-2650407 REVERSEweakly similar to ( 147) CIPK1_ORYSA CIPK-like protein 1 (EC 2.7.11.1) (OsCK1) - Oryza sativa (Rice) S_TKc S_TKc Pkinase SPS1 Pkinase_Tyr TyrKc PTKc PTKc_Csk_like PTKc_Jak_rpt2 PTKc_Tec_like PTKc_FAK PTKc_Srm_Brk PTKc_Ack…	3.34214
29.4	protein.postranslational modification	i1_LQ_LWC_c13302/f1p0/1255	Transcript	moderately similar to ( 374) AT4G17640 | Symbols: CKB2 | CKB2; protein kinase CK2 regulator | chr4:9825438-9826988 FORWARD CK_II_beta SKB2 protein|casein kinase II subunit beta-4, putative, expressed	12.4044
29.4	protein.postranslational modification	i4_LQ_LWC_c10399/f1p0/4959	Transcript	moderately similar to ( 317) AT1G58210 | Symbols: EMB1674 | EMB1674 (EMBRYO DEFECTIVE 1674) | chr1:21553621-21558056 FORWARDKIP1 protein|KIP1, putative, expressed	7.25367
29.4	protein.postranslational modification	i1_LQ_LWC_c6827/f1p148/1763	Transcript	moderately similar to ( 222) AT2G29380 | Symbols: | protein phosphatase 2C, putative / PP2C, putative | chr2:12608855-12610124 FORWARD PP2Cc PP2Cc PP2C PTC1 protein|protein phosphatase 2C, putative, expressed	7.92886
29.4	protein.postranslational modification	i2_LQ_LWC_c65048/f1p0/2192	Transcript	moderately similar to ( 430) AT3G44610 | Symbols: | protein kinase family protein | chr3:16188266-16192107 REVERSEmoderately similar to ( 360) KPK1_PHAVU Protein kinase PVPK-1 (EC 2.7.11.1) - Phaseolus vulgaris (Kidney bean) (French bean) S_TKc S_TKc Pkinase SPS1 PTKc Pkinase_Tyr TyrKc protein|AGC_PVPK_like_kin82y.1 - ACG kinases include homologs to PKA, PKG and PKC, expressed	9.10443
29.4	protein.postranslational modification	i1_HQ_LWC_c10489/f2p0/1651	Transcript	moderately similar to ( 359) AT5G40280 | Symbols: ERA1, ATFTB, WIG | ERA1 (ENHANCED RESPONSE TO ABA 1); farnesyltranstransferase/ protein farnesyltransferase | chr5:16101391-16104783 FORWARDmoderately similar to ( 436) PFTB_PEA Protein farnesyltransferase subunit beta (EC 2.5.1.58) (CAAX farnesyltransferase subunit beta) (RAS proteins prenyltransferase beta) (FTase-beta) - Pisum sativum (Garden p…	-1.05063
29.4	protein.postranslational modification	i1_LQ_LWC_c22585/f1p1/1997	Transcript	weakly similar to ( 166) AT4G15415 | Symbols: ATB' GAMMA | ATB' GAMMA; poly(U) binding / protein phosphatase type 2A regulator | chr4:8817707-8819349 FORWARD B56 protein|serine/threonine protein phosphatase 2A 59 kDa regulatory subunit Bgamma isoform, putative, expressed	-5.41876
29.4	protein.postranslational modification	i1_LQ_LWC_c35711/f1p0/1626	Transcript	highly similar to ( 584) AT1G53050 | Symbols: | protein kinase family protein | chr1:19772574-19775531 FORWARDmoderately similar to ( 208) CDC22_MEDSA Cell division control protein 2 homolog 2 (EC 2.7.11.22) - Medicago sativa (Alfalfa) S_TKc S_TKc Pkinase SPS1 Pkinase_Tyr PTKc TyrKc PTKc_Jak_rpt2 PTKc_Src_like PTKc_EphR PTKc_Lck_Blk PTKc_Jak2_Jak3_rpt2 PTKc_Jak1_rpt2 PTKc_Frk_like PTKc_Tyk2_rpt2 …	-11.9956
29.4	protein.postranslational modification	i2_LQ_LWC_c121195/f1p0/2806	Transcript	highly similar to ( 561) AT1G77720 | Symbols: | protein kinase family protein | chr1:29210730-29213877 FORWARDvery weakly similar to (90.5) CDC2_MAIZE Cell division control protein 2 homolog (EC 2.7.11.22) (EC 2.7.11.23) (p34cdc2) - Zea mays (Maize) S_TKc S_TKc Pkinase SPS1 Pkinase_Tyr PTKc protein|protein kinase family protein, putative, expressed	9.09781
29.4	protein.postranslational modification	i3_LQ_LWC_c9178/f1p0/4000	Transcript	highly similar to ( 733) AT1G03920 | Symbols: | protein kinase, putative | chr1:1001473-1004240 FORWARDweakly similar to ( 160) G11A_ORYSA Protein kinase G11A (EC 2.7.11.1) - Oryza sativa (Rice) S_TKc S_TKc Pkinase SPS1 Pkinase_Tyr TyrKc PTKc protein|AGC_AGC_other_NDRh_TRCd.3 - ACG kinases include homologs to PKA, PKG and PKC, expressed	6.19582
29.4	protein.postranslational modification	i1_HQ_LWC_c2959/f2p0/1693	Transcript	moderately similar to ( 398) AT4G08960 | Symbols: | phosphotyrosyl phosphatase activator (PTPA) family protein | chr4:5746326-5747994 FORWARD PTPA PTPA LAG1 protein|serine/threonine-protein phosphatase 2A activator 2, putative, expressed	10.1534
29.4	protein.postranslational modification	i1_LQ_LWC_c8927/f1p0/1976	Transcript	moderately similar to ( 495) AT3G05580 | Symbols: | serine/threonine protein phosphatase, putative | chr3:1618216-1619850 REVERSEmoderately similar to ( 496) PP1_PHAVU Serine/threonine-protein phosphatase PP1 (EC 3.1.3.16) - Phaseolus vulgaris (Kidney bean) (French bean) PP2Ac PP2Ac Metallophos ApaH protein|Ser/Thr protein phosphatase family protein, putative, expressed	1.77157
29.4	protein.postranslational modification	i2_LQ_LWC_c52799/f1p0/2623	Transcript	moderately similar to ( 381) AT1G07630 | Symbols: PLL5 | PLL5; catalytic/ protein serine/threonine phosphatase | chr1:2349189-2351437 FORWARD PP2Cc PP2Cc PP2C protein|protein phosphatase 2C, putative, expressed	4.75277
29.4	protein.postranslational modification	i2_LQ_LWC_c10031/f1p0/2094	Transcript	moderately similar to ( 340) AT3G48330 | Symbols: PIMT1 | PIMT1 (PROTEIN-L-ISOASPARTATE METHYLTRANSFERASE 1); protein-L-isoaspartate (D-aspartate) O-methyltransferase | chr3:17892969-17893975 REVERSEmoderately similar to ( 338) PIMT_WHEAT Protein-L-isoaspartate O-methyltransferase (EC 2.1.1.77) (Protein-beta-aspartate methyltransferase) (PIMT) (Protein L-isoaspartyl methyltransferase) (L-isoaspar…	4.85118
29.4	protein.postranslational modification	i1_LQ_LWC_c34041/f1p1/1596	Transcript	highly similar to ( 595) AT3G58500 | Symbols: PP2A-3, EP7 | PP2A-3 (PROTEIN PHOSPHATASE 2A-3); protein serine/threonine phosphatase | chr3:21635503-21638911 REVERSEhighly similar to ( 602) PP2A4_ORYSA Serine/threonine-protein phosphatase PP2A-4 catalytic subunit (EC 3.1.3.16) - Oryza sativa (Rice) PP2Ac PP2Ac ApaH Metallophos protein|OsPP2Ac-5 - Phosphatase 2A isoform 5 belonging to family 2, exp…	12.0444
29.4	protein.postranslational modification	i1_HQ_LWC_c29656/f2p0/1683	Transcript	moderately similar to ( 334) AT1G79630 | Symbols: | protein phosphatase 2C family protein / PP2C family protein | chr1:29962931-29964920 REVERSE PP2Cc PP2Cc PP2C PTC1 protein|protein phosphatase 2c, putative, expressed	-3.24876
29.4	protein.postranslational modification	i1_LQ_LWC_c27101/f1p9/1224	Transcript	highly similar to ( 566) AT1G47380 | Symbols: | protein phosphatase 2C-related / PP2C-related | chr1:17373004-17375305 REVERSE PP2Cc PP2Cc PP2C PTC1 protein|protein phosphotase protein, putative, expressed	8.34132
29.4	protein.postranslational modification	i4_LQ_LWC_c15967/f1p0/4149	Transcript	moderately similar to ( 278) AT1G05000 | Symbols: | tyrosine specific protein phosphatase family protein | chr1:1425660-1428393 FORWARD Y_phosphatase2 protein|tyrosine phosphatase family protein, putative, expressed	8.6695
29.4	protein.postranslational modification	i2_LQ_LWC_c88976/f1p1/2278	Transcript	highly similar to ( 759) AT1G17720 | Symbols: ATB BETA | ATB BETA; nucleotide binding / protein phosphatase type 2A regulator | chr1:6093949-6098065 REVERSEhighly similar to ( 779) 2ABB_ORYSA Serine/threonine protein phosphatase 2A 55 kDa regulatory subunit B beta isoform (PP2A, subunit B, beta isoform) - Oryza sativa (Rice) CDC55 protein|serine/threonine protein phosphatase 2A 55 kDa regulatory …	6.39449
29.4	protein.postranslational modification	i1_HQ_LWC_c22316/f2p0/1769	Transcript	moderately similar to ( 387) AT5G63610 | Symbols: HEN3, CDKE;1, ATCDK8 | CDKE;1 (CYCLIN-DEPENDENT KINASE E;1); ATP binding / kinase/ protein kinase/ protein serine/threonine kinase | chr5:25463645-25465057 REVERSEweakly similar to ( 176) CDC2_MAIZE Cell division control protein 2 homolog (EC 2.7.11.22) (EC 2.7.11.23) (p34cdc2) - Zea mays (Maize) S_TKc S_TKc Pkinase SPS1 Pkinase_Tyr PTKc TyrKc PTK…	-1.55372
29.4	protein.postranslational modification	i3_LQ_LWC_c29693/f1p0/3029	Transcript	moderately similar to ( 400) AT1G20930 | Symbols: CDKB2;2 | CDKB2;2 (CYCLIN-DEPENDENT KINASE B2;2); cyclin-dependent protein kinase/ kinase | chr1:7292752-7294664 REVERSEmoderately similar to ( 383) CDC2D_ANTMA Cell division control protein 2 homolog D (EC 2.7.11.22) (EC 2.7.11.23) - Antirrhinum majus (Garden snapdragon) S_TKc S_TKc Pkinase SPS1 protein|cyclin-dependent kinase B2-1, putative, exp…	0
29.4	protein.postranslational modification	i1_LQ_LWC_c21035/f1p6/1842	Transcript	highly similar to ( 597) AT4G38520 | Symbols: | protein phosphatase 2C family protein / PP2C family protein | chr4:18015999-18017514 REVERSE PP2Cc PP2Cc PP2C PTC1 protein|protein phosphatase 2C, putative, expressed	-7.63466
29.4	protein.postranslational modification	i1_LQ_LWC_c7608/f1p0/1496	Transcript	moderately similar to ( 410) AT1G18030 | Symbols: | protein phosphatase 2C, putative / PP2C, putative | chr1:6204400-6206336 FORWARD PP2Cc PP2Cc PP2C PTC1 protein|protein phosphatase 2C, putative, expressed	9.91881
29.4	protein.postranslational modification	i1_LQ_LWC_c8869/f1p0/1981	Transcript	highly similar to ( 783) AT2G17890 | Symbols: CPK16 | CPK16; ATP binding / calcium ion binding / calmodulin-dependent protein kinase/ protein kinase/ protein serine/threonine kinase | chr2:7769885-7772627 REVERSEmoderately similar to ( 436) CRK_DAUCA CDPK-related protein kinase (EC 2.7.11.1) (PK421) - Daucus carota (Carrot) S_TKc S_TKc Pkinase SPS1 Pkinase_Tyr TyrKc PTKc PTKc_Tec_like protein|CAM…	-1.51156
29.4	protein.postranslational modification	i7_LQ_LWC_c151/f1p0/7524	Transcript	highly similar to ( 569) AT1G53050 | Symbols: | protein kinase family protein | chr1:19772574-19775531 FORWARDmoderately similar to ( 215) CDC2A_ANTMA Cell division control protein 2 homolog A (EC 2.7.11.22) (EC 2.7.11.23) - Antirrhinum majus (Garden snapdragon) S_TKc S_TKc Pkinase SPS1 Pkinase_Tyr PTKc TyrKc PTKc_Jak_rpt2 PTKc_Src_like PTKc_Tyk2_rpt2 PTKc_Fes_like PTKc_Jak2_Jak3_rpt2 PTKc_Itk PT…	1.95875
29.4	protein.postranslational modification	i2_HQ_LWC_c127293/f3p1/2376	Transcript	highly similar to ( 723) AT5G47750 | Symbols: D6PKL2, PK5 | D6PKL2 (D6 PROTEIN KINASE LIKE 2); kinase | chr5:19339947-19341864 REVERSEhighly similar to ( 714) G11A_ORYSA Protein kinase G11A (EC 2.7.11.1) - Oryza sativa (Rice) S_TKc S_TKc Pkinase Pkinase_Tyr TyrKc SPS1 PTKc protein|AGC_PVPK_like_kin82y.16 - ACG kinases include homologs to PKA, PKG and PKC, expressed	3.7999
29.4	protein.postranslational modification	i2_LQ_LWC_c11939/f1p0/2471	Transcript	highly similar to ( 631) AT5G51560 | Symbols: | leucine-rich repeat transmembrane protein kinase, putative | chr5:20945807-20948613 FORWARDweakly similar to ( 147) NORK_PEA Nodulation receptor kinase precursor (EC 2.7.11.1) - Pisum sativum (Garden pea) TyrKc PTKc Pkinase_Tyr PTKc_Jak_rpt2 PTKc_Srm_Brk PTKc_Tec_like PTKc_Jak2_Jak3_rpt2 PTKc_Src_like S_TKc Pkinase PTKc_Tec_Rlk S_TKc PTKc_Itk PTKc_C…	-1.79232
29.4	protein.postranslational modification	i3_LQ_LWC_c8807/f1p0/3241	Transcript	highly similar to ( 540) AT3G50420 | Symbols: | pentatricopeptide (PPR) repeat-containing protein | chr3:18710871-18713649 REVERSEvery weakly similar to (85.5) RF1_ORYSA Rf1 protein, mitochondrial precursor (PPR protein) (Fertility restorer) (Restorer for CMS) - Oryza sativa (Rice) protein|pentatricopeptide, putative, expressed	6.99204
29.4	protein.postranslational modification	i2_LQ_LWC_c25941/f1p0/2167	Transcript	highly similar to ( 667) AT2G37710 | Symbols: RLK | RLK (receptor lectin kinase); kinase | chr2:15814934-15816961 REVERSEweakly similar to ( 195) PSKR_DAUCA Phytosulfokine receptor precursor (EC 2.7.11.1) (Phytosulfokine LRR receptor kinase) - Daucus carota (Carrot) Lectin_legB S_TKc S_TKc PTKc Pkinase Pkinase_Tyr TyrKc PTKc_Csk_like SPS1 PTKc_Jak_rpt2 PTKc_EphR PTKc_Srm_Brk PTKc_Abl PTKc_EGFR_li…	0
29.4	protein.postranslational modification	i2_LQ_LWC_c71723/f1p0/2123	Transcript	moderately similar to ( 432) AT3G58590 | Symbols: | pentatricopeptide (PPR) repeat-containing protein | chr3:21666262-21668487 FORWARD protein|pentatricopeptide, putative, expressed	-7.548
29.4	protein.postranslational modification	i1_HQ_LWC_c16535/f2p0/1480	Transcript	moderately similar to ( 496) AT4G31860 | Symbols: | protein phosphatase 2C, putative / PP2C, putative | chr4:15406685-15408589 REVERSE PP2Cc PP2Cc PP2C PTC1 protein|protein phosphatase 2C, putative, expressed	10.7161
29.4	protein.postranslational modification	i2_LQ_LWC_c53315/f1p1/2697	Transcript	highly similar to ( 695) AT5G47750 | Symbols: D6PKL2, PK5 | D6PKL2 (D6 PROTEIN KINASE LIKE 2); kinase | chr5:19339947-19341864 REVERSEnearly identical (1061) G11A_ORYSA Protein kinase G11A (EC 2.7.11.1) - Oryza sativa (Rice) S_TKc S_TKc Pkinase TyrKc Pkinase_Tyr SPS1 PTKc protein|AGC_PVPK_like_kin82y.13 - ACG kinases include homologs to PKA, PKG and PKC, expressed	6.35504
29.4	protein.postranslational modification	i1_LQ_LWC_c18155/f1p0/1715	Transcript	moderately similar to ( 363) AT4G33920 | Symbols: | protein phosphatase 2C family protein / PP2C family protein | chr4:16260876-16262703 FORWARD PP2Cc PP2Cc PP2C PTC1 protein|protein phosphatase 2C, putative, expressed	10.4267
29.4	protein.postranslational modification	i0_LQ_LWC_c828/f1p0/921	Transcript	moderately similar to ( 254) AT1G05000 | Symbols: | tyrosine specific protein phosphatase family protein | chr1:1425660-1428393 FORWARD Y_phosphatase2 protein|tyrosine phosphatase family protein, putative, expressed	12.195
29.4	protein.postranslational modification	i2_LQ_LWC_c22393/f1p0/2287	Transcript	highly similar to ( 582) AT2G37710 | Symbols: RLK | RLK (receptor lectin kinase); kinase | chr2:15814934-15816961 REVERSEweakly similar to ( 196) PSKR_DAUCA Phytosulfokine receptor precursor (EC 2.7.11.1) (Phytosulfokine LRR receptor kinase) - Daucus carota (Carrot) Lectin_legB Pkinase S_TKc S_TKc Pkinase_Tyr TyrKc PTKc PTKc_EphR PTKc_Jak_rpt2 SPS1 PTKc_EphR_A2 PTKc_Tec_like PTKc_Srm_Brk PTKc_Frk…	5.50671
29.4	protein.postranslational modification	i1_LQ_LWC_c39083/f1p0/1191	Transcript	moderately similar to ( 303) AT4G25130 | Symbols: | peptide methionine sulfoxide reductase, putative | chr4:12898802-12899998 REVERSEmoderately similar to ( 311) MSRA_LACSA Peptide methionine sulfoxide reductase (EC 1.8.4.11) (Protein-methionine-S-oxide reductase) (Peptide-methionine (S)-S-oxide reductase) (Peptide Met(O) reductase) - Lactuca sativa (Garden lettuce) PRK00058 MsrA PMSR PRK05550 PR…	11.7784
29.4	protein.postranslational modification	i1_HQ_LWC_c29624/f2p0/1838	Transcript	moderately similar to ( 444) AT1G12680 | Symbols: PEPKR2 | PEPKR2 (Phosphoenolpyruvate carboxylase-related kinase 2); ATP binding / kinase/ protein kinase/ protein serine/threonine kinase | chr1:4320123-4322269 REVERSEmoderately similar to ( 233) CDPK_SOYBN Calcium-dependent protein kinase SK5 (EC 2.7.11.1) (CDPK) - Glycine max (Soybean) S_TKc S_TKc Pkinase SPS1 Pkinase_Tyr PTKc TyrKc PTKc_Tec_li…	8.55818
29.4	protein.postranslational modification	i1_LQ_LWC_c33419/f1p0/1718	Transcript	highly similar to ( 718) AT1G09840 | Symbols: ATSK41 | ATSK41 (SHAGGY-LIKE PROTEIN KINASE 41); ATP binding / protein kinase/ protein serine/threonine kinase | chr1:3196114-3199524 REVERSEhighly similar to ( 660) MSK2_MEDSA Glycogen synthase kinase-3 homolog MsK-2 (EC 2.7.11.1) - Medicago sativa (Alfalfa) S_TKc S_TKc Pkinase SPS1 TyrKc Pkinase_Tyr PTKc PTKc_Jak_rpt2 PTKc_Jak2_Jak3_rpt2 PTKc_Syk_li…	-12.8038
29.4	protein.postranslational modification	i1_LQ_LWC_c23929/f1p0/1750	Transcript	highly similar to ( 513) AT5G06750 | Symbols: | protein phosphatase 2C family protein / PP2C family protein | chr5:2086403-2088245 REVERSE PP2Cc PP2Cc PP2C PTC1 protein|protein phosphatase 2C, putative, expressed	-5.70414
29.4	protein.postranslational modification	i1_LQ_LWC_c6552/f1p17/1730	Transcript	moderately similar to ( 400) AT1G49160 | Symbols: WNK7 | WNK7; kinase/ protein kinase | chr1:18179473-18181867 REVERSEvery weakly similar to (89.7) M2K1_ORYSA Mitogen-activated protein kinase kinase 1 (EC 2.7.12.2) (MAP kinase kinase 1) (MAPKK1) (OsMEK1) - Oryza sativa (Rice) S_TKc S_TKc Pkinase TyrKc Pkinase_Tyr PTKc SPS1 PTKc_Jak_rpt2 PTKc_Jak1_rpt2 PTKc_Srm_Brk PTKc_Ack_like PTKc_Frk_like PTKc…	3.99446
29.4	protein.postranslational modification	i2_LQ_LWC_c8007/f1p0/2280	Transcript	moderately similar to ( 444) AT1G07630 | Symbols: PLL5 | PLL5; catalytic/ protein serine/threonine phosphatase | chr1:2349189-2351437 FORWARD PP2Cc PP2Cc PP2C protein|protein phosphatase 2C, putative, expressed	5.08925
29.4	protein.postranslational modification	i1_LQ_LWC_c23839/f1p0/1840	Transcript	moderately similar to ( 485) AT3G53030 | Symbols: SRPK4 | SRPK4 (Ser/Arg-rich protein kinase 4); kinase/ protein kinase | chr3:19662412-19664362 FORWARD S_TKc S_TKc Pkinase protein|SRPK4, putative, expressed	11.2694
29.4	protein.postranslational modification	i2_LQ_LWC_c85949/f1p1/2248	Transcript	highly similar to ( 610) AT5G50000 | Symbols: | protein kinase, putative | chr5:20342838-20345033 REVERSEvery weakly similar to (99.0) NORK_MEDTR Nodulation receptor kinase precursor (EC 2.7.11.1) (Does not make infections protein 2) (Symbiosis receptor-like kinase) (MtSYMRK) - Medicago truncatula (Barrel medic) Pkinase_Tyr TyrKc PTKc S_TKc S_TKc Pkinase PTKc_Csk_like PTKc_Tec_like PTKc_Chk PTKc_…	4.70082
29.4	protein.postranslational modification	i2_LQ_LWC_c12059/f1p0/2961	Transcript	highly similar to ( 799) AT5G23720 | Symbols: PHS1 | PHS1 (PROPYZAMIDE-HYPERSENSITIVE 1); phosphoprotein phosphatase/ protein tyrosine/serine/threonine phosphatase | chr5:7998506-8002594 FORWARD DSPc Act-Frag_cataly DSPc DSPc protein|PHS1, putative, expressed	-7.025
29.4	protein.postranslational modification	i2_HQ_LWC_c8163/f2p0/2387	Transcript	moderately similar to ( 315) AT4G13650 | Symbols: | pentatricopeptide (PPR) repeat-containing protein | chr4:7939611-7942898 REVERSEweakly similar to ( 103) RF1_ORYSA Rf1 protein, mitochondrial precursor (PPR protein) (Fertility restorer) (Restorer for CMS) - Oryza sativa (Rice) protein|vegetative storage protein, putative, expressed	7.39337
29.4	protein.postranslational modification	i1_LQ_LWC_c13599/f1p2/1213	Transcript	moderately similar to ( 335) AT4G31750 | Symbols: WIN2 | WIN2 (HOPW1-1-INTERACTING 2); protein serine/threonine phosphatase | chr4:15364657-15367207 REVERSE PP2Cc PP2Cc PP2C PTC1 protein|protein phosphatase 2C, putative, expressed	1.45158
29.4	protein.postranslational modification	i5_LQ_LWC_c6639/f1p0/5305	Transcript	moderately similar to ( 232) AT1G29370 | Symbols: | kinase-related | chr1:10278080-10283024 REVERSEDUF1296 protein|protein of unknown function DUF1296 domain containing protein, expressed	7.68949
29.4	protein.postranslational modification	i1_LQ_LWC_c20926/f1p0/2009	Transcript	moderately similar to ( 493) AT3G23340 | Symbols: ckl10 | ckl10 (Casein Kinase I-like 10); ATP binding / kinase/ protein kinase/ protein serine/threonine kinase | chr3:8351047-8353791 FORWARD S_TKc Pkinase SPS1 protein|CK1_CaseinKinase_1.6 - CK1 includes the casein kinase 1 kinases, expressed	-8.19805
29.4	protein.postranslational modification	i1_HQ_LWC_c14899/f5p0/1785	Transcript	moderately similar to ( 356) AT1G72770 | Symbols: HAB1 | HAB1 (HOMOLOGY TO ABI1); catalytic/ protein serine/threonine phosphatase | chr1:27390998-27392413 FORWARD PP2Cc PP2Cc PP2C PTC1 protein|protein phosphatase 2C, putative, expressed	0
29.4	protein.postranslational modification	i1_LQ_LWC_c21289/f1p0/1434	Transcript	moderately similar to ( 444) AT1G04190 | Symbols: | tetratricopeptide repeat (TPR)-containing protein | chr1:1106617-1108557 REVERSEvery weakly similar to (85.9) STIP_SOYBN Heat shock protein STI (Stress-inducible protein) (GmSTI) - Glycine max (Soybean) TPR protein|tetratricopeptide repeat domain containing protein, expressed	11.5118
29.4	protein.postranslational modification	i1_LQ_LWC_c34716/f1p0/1946	Transcript	moderately similar to ( 393) AT2G37840 | Symbols: | protein kinase family protein | chr2:15853108-15856047 FORWARDweakly similar to ( 111) CDPK1_ORYSA Calcium-dependent protein kinase, isoform 1 (EC 2.7.11.1) (CDPK 1) - Oryza sativa (Rice) S_TKc S_TKc Pkinase PTKc Pkinase_Tyr TyrKc SPS1 protein|CAMK_CAMK_like_ULKh_APGy.2 - CAMK includes calcium/calmodulin depedent protein kinases, expressed	5.32222
29.4	protein.postranslational modification	i1_LQ_LWC_c4553/f1p0/1592	Transcript	highly similar to ( 630) AT3G58500 | Symbols: PP2A-3, EP7 | PP2A-3 (PROTEIN PHOSPHATASE 2A-3); protein serine/threonine phosphatase | chr3:21635503-21638911 REVERSEhighly similar to ( 665) PP2A2_ORYSA Serine/threonine-protein phosphatase PP2A-2 catalytic subunit (EC 3.1.3.16) - Oryza sativa (Rice) PP2Ac PP2Ac ApaH Metallophos protein|OsPP2Ac-2 - Phosphatase 2A isoform 2 belonging to family 2, exp…	1.63
29.4	protein.postranslational modification	i2_LQ_LWC_c103931/f1p0/3024	Transcript	highly similar to ( 555) AT3G10550 | Symbols: | phosphatase/ protein tyrosine phosphatase | chr3:3293210-3298452 REVERSE Myotub-related protein|inositol or phosphatidylinositol phosphatase/ phosphoric monoester hydrolase, putative, expressed	-8.00246
29.4	protein.postranslational modification	i1_HQ_LWC_c37495/f2p0/1235	Transcript	moderately similar to ( 426) AT3G09970 | Symbols: | calcineurin-like phosphoesterase family protein | chr3:3063813-3065337 FORWARD protein|Ser/Thr protein phosphatase family protein, putative, expressed	2.21075
29.4	protein.postranslational modification	i5_LQ_LWC_c7111/f1p0/5596	Transcript	moderately similar to ( 335) AT5G38280 | Symbols: PR5K | PR5K; kinase/ transmembrane receptor protein serine/threonine kinase | chr5:15293325-15295838 REVERSEmoderately similar to ( 209) KPRO_MAIZE Putative receptor protein kinase ZmPK1 precursor (EC 2.7.11.1) - Zea mays (Maize) Pkinase_Tyr TyrKc PTKc S_TKc Pkinase S_TKc PTKc_Src_like PTKc_Frk_like PTKc_Syk_like PTKc_Jak_rpt2 PTKc_Abl PTKc_Srm_Br…	8.27313
29.4	protein.postranslational modification	i1_LQ_LWC_c6415/f1p3/2042	Transcript	highly similar to ( 550) AT5G58380 | Symbols: CIPK10, PKS2, SIP1, SNRK3.8 | SIP1 (SOS3-INTERACTING PROTEIN 1); ATP binding / kinase/ protein kinase/ protein serine/threonine kinase | chr5:23597092-23598531 REVERSEmoderately similar to ( 437) CIPK1_ORYSA CIPK-like protein 1 (EC 2.7.11.1) (OsCK1) - Oryza sativa (Rice) S_TKc S_TKc Pkinase SPS1 Pkinase_Tyr TyrKc PTKc PTKc_Csk_like PTKc_Fes PTKc_Srm_B…	-8.65401
29.4	protein.postranslational modification	i2_LQ_LWC_c108663/f1p0/2812	Transcript	moderately similar to ( 412) AT1G58210 | Symbols: EMB1674 | EMB1674 (EMBRYO DEFECTIVE 1674) | chr1:21553621-21558056 FORWARDKIP1 protein|KIP1, putative, expressed	-2.11929
29.4	protein.postranslational modification	i1_LQ_LWC_c4157/f1p0/2020	Transcript	moderately similar to ( 212) AT2G25010 | Symbols: | unknown protein | chr2:10631691-10633547 FORWARD protein|transposon protein, putative, unclassified, expressed	0
29.4	protein.postranslational modification	i1_LQ_LWC_c12777/f1p0/1510	Transcript	moderately similar to ( 393) AT5G19680 | Symbols: | leucine-rich repeat family protein | chr5:6649663-6651564 FORWARD protein|protein phosphatase 1 regulatory subunit SDS22, putative, expressed	3.47921
29.4	protein.postranslational modification	i2_LQ_LWC_c11979/f1p0/2747	Transcript	moderately similar to ( 409) AT4G23660 | Symbols: AtPPT1 | AtPPT1 (Arabidopsis thaliana polyprenyltransferase 1); 4-hydroxybenzoate nonaprenyltransferase | chr4:12328086-12331359 REVERSE ubiA ubiA ubiA ubiA UbiA ubiA ubiA UbiA ubiA ubiA ubiA ubiA protein|para-hydroxybenzoate--polyprenyltransferase, mitochondrial precursor, putative, expressed	-5.63839
29.4	protein.postranslational modification	i1_LQ_LWC_c42207/f1p0/1014	Transcript	highly similar to ( 835) AT3G01090 | Symbols: AKIN10 | AKIN10 (Arabidopsis SNF1 kinase homolog 10); protein binding / protein kinase | chr3:31437-33977 REVERSEhighly similar to ( 697) RKIN1_SECCE Carbon catabolite derepressing protein kinase (EC 2.7.11.1) - Secale cereale (Rye) S_TKc S_TKc Pkinase SPS1 Pkinase_Tyr TyrKc PTKc PTKc_Jak_rpt2 PTKc_FAK PTKc_Tec_Rlk PTKc_Srm_Brk PTKc_Tec_like PTKc_Csk_…	-9.61132
29.4	protein.postranslational modification	i1_HQ_LWC_c39419/f5p0/1498	Transcript	moderately similar to ( 358) AT4G11260 | Symbols: ATSGT1B, ETA3, RPR1, EDM1, SGT1B | SGT1B; protein binding | chr4:6851515-6853719 REVERSE SGT1 p23 SGS CS protein|suppressor of G2 allele of SKP1, putative, expressed	13.6426
29.4	protein.postranslational modification	i1_LQ_LWC_c11814/f1p1/1913	Transcript	highly similar to ( 596) AT4G33950 | Symbols: OST1, SNRK2-6, SRK2E, SNRK2.6, P44 | OST1 (OPEN STOMATA 1); calcium-dependent protein serine/threonine kinase/ kinase/ protein kinase | chr4:16272819-16274657 FORWARDhighly similar to ( 701) SAPKA_ORYSA Serine/threonine-protein kinase SAPK10 (EC 2.7.11.1) (Osmotic stress/abscisic acid-activated protein kinase 10) - Oryza sativa (Rice) S_TKc S_TKc Pkin…	-2.15229
29.4	protein.postranslational modification	i2_HQ_LWC_c12167/f3p0/2998	Transcript	highly similar to ( 713) AT1G69220 | Symbols: SIK1 | SIK1; ATP binding / kinase/ protein kinase/ protein serine/threonine kinase | chr1:26020298-26026119 REVERSEweakly similar to ( 152) M2K1_ORYSA Mitogen-activated protein kinase kinase 1 (EC 2.7.12.2) (MAP kinase kinase 1) (MAPKK1) (OsMEK1) - Oryza sativa (Rice) S_TKc S_TKc Pkinase Pkinase_Tyr TyrKc SPS1 PTKc PTKc_Jak_rpt2 KIND PTKc_Fes_like PTK…	11.6101
29.4	protein.postranslational modification	i1_LQ_LWC_c33946/f1p0/1766	Transcript	moderately similar to ( 379) AT5G47750 | Symbols: D6PKL2, PK5 | D6PKL2 (D6 PROTEIN KINASE LIKE 2); kinase | chr5:19339947-19341864 REVERSEmoderately similar to ( 247) KPK1_PHAVU Protein kinase PVPK-1 (EC 2.7.11.1) - Phaseolus vulgaris (Kidney bean) (French bean) S_TKc S_TKc Pkinase SPS1 Pkinase_Tyr TyrKc protein|AGC_PVPK_like_kin82y.3 - ACG kinases include homologs to PKA, PKG and PKC, expressed	7.68606
29.4	protein.postranslational modification	i2_HQ_LWC_c92480/f2p0/2126	Transcript	moderately similar to ( 314) AT5G10530 | Symbols: | lectin protein kinase, putative | chr5:3324978-3326933 REVERSEweakly similar to ( 170) NORK_PEA Nodulation receptor kinase precursor (EC 2.7.11.1) - Pisum sativum (Garden pea) S_TKc S_TKc Pkinase_Tyr Pkinase TyrKc PTKc SPS1 PTKc_EphR PTKc_Jak_rpt2 PTKc_Srm_Brk PTKc_Trk PTKc_Fes_like PTKc_Src_like PTKc_EphR_A PTKc_EphR_B PTKc_Frk_like PTKc_FAK PT…	9.12098
29.4	protein.postranslational modification	i5_LQ_LWC_c6451/f1p0/5580	Transcript	moderately similar to ( 394) AT1G16220 | Symbols: | protein phosphatase 2C family protein / PP2C family protein | chr1:5548653-5550553 FORWARD PP2Cc PP2Cc PP2C PTC1 protein|protein phosphatase 2C, putative, expressed	6.91674
29.4	protein.postranslational modification	i11_LQ_LWC_c38/f1p0/11448	Transcript	highly similar to ( 513) AT4G29380 | Symbols: | protein kinase family protein / WD-40 repeat family protein | chr4:14458822-14464692 FORWARD S_TKc S_TKc Pkinase protein|WD domain and HEAT domain containing protein, putative, expressed	0
29.4	protein.postranslational modification	i1_LQ_LWC_c8135/f1p3/1849	Transcript	highly similar to ( 721) AT2G46700 | Symbols: ATCRK3 | calcium-dependent protein kinase, putative / CDPK, putative | chr2:19182968-19184892 REVERSEhighly similar to ( 671) CRK_DAUCA CDPK-related protein kinase (EC 2.7.11.1) (PK421) - Daucus carota (Carrot) S_TKc S_TKc Pkinase SPS1 Pkinase_Tyr TyrKc PTKc PTKc_Tec_like PTKc_Tec_Rlk PTKc_Src_like PTKc_Srm_Brk PTKc_Btk_Bmx PTKc_Jak_rpt2 PTKc_Csk_like…	1.05191
29.4	protein.postranslational modification	i2_LQ_LWC_c102532/f1p2/2331	Transcript	moderately similar to ( 477) AT4G13020 | Symbols: MHK | MHK; ATP binding / kinase/ protein kinase/ protein serine/threonine kinase | chr4:7603947-7606732 FORWARDmoderately similar to ( 215) CDC22_MEDSA Cell division control protein 2 homolog 2 (EC 2.7.11.22) - Medicago sativa (Alfalfa) S_TKc S_TKc Pkinase Pkinase_Tyr SPS1 TyrKc PTKc PTKc_Tec_like PTKc_Jak_rpt2 PTKc_EphR PTKc_Itk PTKc_Trk PTKc_Ror…	-7.38609
29.4	protein.postranslational modification	i1_HQ_LWC_c11031/f2p0/1681	Transcript	highly similar to ( 520) AT1G60940 | Symbols: SNRK2-10, SNRK2.10, SRK2B | SNRK2.10 (SNF1-RELATED PROTEIN KINASE 2.10); kinase | chr1:22439398-22441896 REVERSEhighly similar to ( 685) SAPK5_ORYSA Serine/threonine-protein kinase SAPK5 (EC 2.7.11.1) (Osmotic stress/abscisic acid-activated protein kinase 5) - Oryza sativa (Rice) S_TKc S_TKc Pkinase SPS1 Pkinase_Tyr TyrKc PTKc PTKc_Jak_rpt2 PTKc_Tyk2_…	1.06659
29.4	protein.postranslational modification	i4_LQ_LWC_c21748/f1p0/4396	Transcript	moderately similar to ( 216) AT2G22560 | Symbols: | FUNCTIONS IN: molecular_function unknown; INVOLVED IN: biological_process unknown; LOCATED IN: plasma membrane; EXPRESSED IN: 15 plant structures; EXPRESSED DURING: 6 growth stages; CONTAINS InterPro DOMAIN/s: KIP1-like (InterPro:IPR011684); BEST Arabidopsis thaliana protein match is: kinase interacting family protein (TAIR:AT5G10500.1); Has 478…	6.61009
29.4	protein.postranslational modification	i2_HQ_LWC_c8617/f2p1/2715	Transcript	highly similar to ( 731) AT5G03730 | Symbols: CTR1, SIS1 | CTR1 (CONSTITUTIVE TRIPLE RESPONSE 1); kinase/ protein binding / protein serine/threonine kinase/ protein serine/threonine/tyrosine kinase | chr5:974958-979660 REVERSEweakly similar to ( 115) NORK_MEDTR Nodulation receptor kinase precursor (EC 2.7.11.1) (Does not make infections protein 2) (Symbiosis receptor-like kinase) (MtSYMRK) - Medi…	-2.29376
29.4	protein.postranslational modification	i1_LQ_LWC_c22042/f1p0/2022	Transcript	highly similar to ( 564) AT5G21326 | Symbols: | protein kinase family protein / NAF domain-containing protein | chr5:7218081-7221743 FORWARDhighly similar to ( 772) CIPK1_ORYSA CIPK-like protein 1 (EC 2.7.11.1) (OsCK1) - Oryza sativa (Rice) S_TKc S_TKc Pkinase SPS1 Pkinase_Tyr TyrKc PTKc NAF PTKc_Fes PTKc_Csk_like protein|CAMK_KIN1/SNF1/Nim1_like.2 - CAMK includes calcium/calmodulin depedent prot…	-3.27856
29.4	protein.postranslational modification	i2_LQ_LWC_c27076/f1p0/2077	Transcript	moderately similar to ( 499) AT3G46920 | Symbols: | protein kinase family protein | chr3:17280430-17284857 REVERSEvery weakly similar to (99.0) NORK_MEDTR Nodulation receptor kinase precursor (EC 2.7.11.1) (Does not make infections protein 2) (Symbiosis receptor-like kinase) (MtSYMRK) - Medicago truncatula (Barrel medic) Pkinase_Tyr TyrKc PTKc S_TKc Pkinase S_TKc PTKc_Tec_like PTKc_Csk_like PTKc_…	7.34014
[truncated: 862 more rows]

## Sheet: 3hr
BinCode	BinName	transcript_ids	type	description	input_3hr.txt
[truncated: 1,865 more rows]

## Sheet: 7hr
BinCode	BinName	transcript_ids	type	description	input_7hr.txt
[truncated: 1,865 more rows]

## Sheet: annotation
BinCode	BinName	type	description
[truncated: 1,865 more rows]
